# Supplementary material for: Predicting long term breast cancer risk using longitudinal mammographic screening history
Source: Research Square preprint supplement (doi:10.21203/rs.3.rs-3376534/v1), 2023-09-27
Supplement: Supplementary file 1 [file c6fd151541fcb3d09f6078ca.xlsx]

## Sheet: Fig. 3
Fig.3. A. Patient level - Inhouse test set							Fig.3. B. Patient level - Inhouse screening cohort 1							Fig.3. C. Patient level - Inhouse screening cohort 2							Fig.3. D. Patient level - Inhosue recurrence cohort							Fig.3. E. Patient level - External CSAW-CC dataset							Fig.3. F. Breast level - Inhouse test set							Fig.3. G. Breast level - Inhouse screening cohort 1							Fig.3. H. Breast level - Inhouse screening cohort 2
	fpr	tpr	thresholds	followup	auc			fpr	tpr	thresholds	followup	auc			fpr	tpr	thresholds	followup	auc			fpr	tpr	thresholds	followup	auc			fpr	tpr	thresholds	followup	auc			fpr	tpr	thresholds	followup	auc			fpr	tpr	thresholds	followup	auc
0	0	0	1.99998	1	0.908655		0	0	0	1.99983	1	0.769295		0	0	0	1.99933	1	0.7408		0	0	0	1.99545	1	0.817905		0	0	0	1.99864	1	0.893164		0	0	0	1.99979	1	0.889971		0	0	0	1.9985	1	0.762645		0
1	0	0.00195695	0.999977	1	0.908655		1	0	0.00729927	0.999834	1	0.769295		1	0	0.0196078	0.999333	1	0.7408		1	0	0.0140845	0.99545	1	0.817905		1	0	0.0019084	0.998639	1	0.893164		1	0	0.00204499	0.999794	1	0.889971		1	8.49762e-05	0	0.998499	1	0.762645		1
2	0	0.00391389	0.99988	1	0.908655		2	0	0.0218978	0.999333	1	0.769295		2	0	0.0294118	0.998634	1	0.7408		2	0.0003885	0.0140845	0.99529	1	0.817905		2	0	0.0916031	0.977723	1	0.893164		2	0	0.00613497	0.999217	1	0.889971		2	8.49762e-05	0.00943396	0.993801	1	0.762645		2
3	0	0.00782779	0.999878	1	0.908655		3	0	0.0291971	0.998634	1	0.769295		3	0.000397062	0.0294118	0.99529	1	0.7408		3	0.0003885	0.0422535	0.983789	1	0.817905		3	4.13685e-05	0.0916031	0.977607	1	0.893164		3	0	0.0163599	0.99861	1	0.889971		3	0.000169952	0.00943396	0.984815	1	0.762645		3
4	0	0.0117417	0.999834	1	0.908655		4	0	0.0437956	0.998441	1	0.769295		4	0.000397062	0.0686275	0.990871	1	0.7408		4	0.0003885	0.0704225	0.93963	1	0.817905		4	4.13685e-05	0.219466	0.889329	1	0.893164		4	8.24198e-05	0.0163599	0.998499	1	0.889971		4	0.000169952	0.0283019	0.978566	1	0.762645		4
5	0	0.0156556	0.999832	1	0.908655		5	0.000344828	0.0437956	0.99529	1	0.769295		5	0.000794123	0.0686275	0.968165	1	0.7408		5	0.0003885	0.084507	0.920574	1	0.817905		5	8.27369e-05	0.219466	0.881832	1	0.893164		5	8.24198e-05	0.0204499	0.997673	1	0.889971		5	0.000764786	0.0283019	0.854151	1	0.762645		5
6	0	0.037182	0.999563	1	0.908655		6	0.000344828	0.080292	0.989205	1	0.769295		6	0.000794123	0.0784314	0.967202	1	0.7408		6	0.0011655	0.084507	0.903393	1	0.817905		6	8.27369e-05	0.221374	0.879401	1	0.893164		6	8.24198e-05	0.0327198	0.996193	1	0.889971		6	0.000934738	0.0283019	0.849159	1	0.762645		6
7	0	0.0450098	0.999485	1	0.908655		7	0.000689655	0.080292	0.981222	1	0.769295		7	0.000992654	0.0784314	0.947443	1	0.7408		7	0.0011655	0.0985915	0.894877	1	0.817905		7	0.000165474	0.221374	0.878226	1	0.893164		7	8.24198e-05	0.0613497	0.99182	1	0.889971		7	0.00101971	0.0283019	0.830025	1	0.762645		7
8	0	0.0547945	0.999355	1	0.908655		8	0.000689655	0.0875912	0.978492	1	0.769295		8	0.000992654	0.0980392	0.944118	1	0.7408		8	0.001554	0.0985915	0.856608	1	0.817905		8	0.000165474	0.244275	0.840809	1	0.893164		8	8.24198e-05	0.0736196	0.989882	1	0.889971		8	0.00118967	0.0283019	0.809983	1	0.762645		8
9	0	0.0587084	0.999333	1	0.908655		9	0.00103448	0.0875912	0.968165	1	0.769295		9	0.00178678	0.0980392	0.896693	1	0.7408		9	0.001554	0.15493	0.752103	1	0.817905		9	0.000248211	0.244275	0.835657	1	0.893164		9	8.24198e-05	0.0777096	0.988978	1	0.889971		9	0.00169952	0.0283019	0.773848	1	0.762645		9
10	0	0.0645793	0.999171	1	0.908655		10	0.00103448	0.0948905	0.967202	1	0.769295		10	0.00178678	0.107843	0.894877	1	0.7408		10	0.0027195	0.15493	0.65802	1	0.817905		10	0.000248211	0.25	0.833277	1	0.893164		10	8.24198e-05	0.0817996	0.987345	1	0.889971		10	0.00186948	0.0283019	0.755163	1	0.762645		10
11	0	0.0684932	0.999089	1	0.908655		11	0.00172414	0.0948905	0.947443	1	0.769295		11	0.0025809	0.107843	0.855078	1	0.7408		11	0.0027195	0.169014	0.60108	1	0.817905		11	0.000289579	0.25	0.828345	1	0.893164		11	8.24198e-05	0.0858896	0.985475	1	0.889971		11	0.00237933	0.0283019	0.671837	1	0.762645		11
12	0	0.0704501	0.999028	1	0.908655		12	0.00172414	0.109489	0.944118	1	0.769295		12	0.0025809	0.127451	0.848356	1	0.7408		12	0.00777001	0.169014	0.372785	1	0.817905		12	0.000289579	0.255725	0.806818	1	0.893164		12	0.00016484	0.0858896	0.984815	1	0.889971		12	0.00237933	0.0377358	0.667045	1	0.762645		12
13	0	0.074364	0.999027	1	0.908655		13	0.00189655	0.109489	0.942656	1	0.769295		13	0.00277943	0.127451	0.847231	1	0.7408		13	0.00777001	0.183099	0.344686	1	0.817905		13	0.000330948	0.255725	0.805137	1	0.893164		13	0.00016484	0.102249	0.979139	1	0.889971		13	0.00263426	0.0377358	0.647397	1	0.762645		13
14	0	0.0880626	0.998528	1	0.908655		14	0.00189655	0.116788	0.934077	1	0.769295		14	0.00277943	0.137255	0.843135	1	0.7408		14	0.00815851	0.183099	0.340938	1	0.817905		14	0.000330948	0.267176	0.797992	1	0.893164		14	0.00016484	0.106339	0.978767	1	0.889971		14	0.00280421	0.0377358	0.646606	1	0.762645		14
15	0	0.0919765	0.998519	1	0.908655		15	0.00189655	0.131387	0.926675	1	0.769295		15	0.00317649	0.137255	0.833899	1	0.7408		15	0.00815851	0.197183	0.333466	1	0.817905		15	0.000372316	0.267176	0.797397	1	0.893164		15	0.00016484	0.110429	0.978212	1	0.889971		15	0.00288919	0.0377358	0.637097	1	0.762645		15
16	0	0.0958904	0.998506	1	0.908655		16	0.00224138	0.131387	0.925095	1	0.769295		16	0.00357356	0.137255	0.831043	1	0.7408		16	0.00854701	0.197183	0.332552	1	0.817905		16	0.000372316	0.290076	0.760959	1	0.893164		16	0.00016484	0.114519	0.978041	1	0.889971		16	0.00305914	0.0377358	0.617947	1	0.762645		16
17	0	0.0998043	0.998441	1	0.908655		17	0.00241379	0.131387	0.921081	1	0.769295		17	0.00436768	0.137255	0.785253	1	0.7408		17	0.00854701	0.211268	0.326707	1	0.817905		17	0.000413685	0.290076	0.75368	1	0.893164		17	0.00016484	0.126789	0.969111	1	0.889971		17	0.00730795	0.0377358	0.228125	1	0.762645		17
18	0	0.111546	0.998141	1	0.908655		18	0.00241379	0.138686	0.913772	1	0.769295		18	0.00436768	0.156863	0.775969	1	0.7408		18	0.010101	0.211268	0.293791	1	0.817905		18	0.000413685	0.293893	0.749772	1	0.893164		18	0.00024726	0.126789	0.965288	1	0.889971		18	0.00747791	0.0377358	0.219756	1	0.762645		18
19	0	0.11546	0.998126	1	0.908655		19	0.00344828	0.138686	0.896693	1	0.769295		19	0.00456621	0.156863	0.771337	1	0.7408		19	0.010101	0.239437	0.281113	1	0.817905		19	0.000455053	0.293893	0.749466	1	0.893164		19	0.00024726	0.128834	0.965083	1	0.889971		19	0.00798776	0.0377358	0.210439	1	0.762645		19
20	0	0.119374	0.997852	1	0.908655		20	0.00344828	0.145985	0.894877	1	0.769295		20	0.00496327	0.156863	0.763454	1	0.7408		20	0.0151515	0.239437	0.232212	1	0.817905		20	0.000455053	0.307252	0.733012	1	0.893164		20	0.000329679	0.128834	0.963368	1	0.889971		20	0.00798776	0.0471698	0.210244	1	0.762645		20
21	0	0.127202	0.997757	1	0.908655		21	0.005	0.145985	0.853697	1	0.769295		21	0.00635299	0.156863	0.690061	1	0.7408		21	0.0151515	0.253521	0.230075	1	0.817905		21	0.000496422	0.307252	0.732358	1	0.893164		21	0.000329679	0.147239	0.94833	1	0.889971		21	0.00815772	0.0471698	0.203397	1	0.762645		21
22	0	0.135029	0.997547	1	0.908655		22	0.005	0.160584	0.848356	1	0.769295		22	0.00675005	0.156863	0.689383	1	0.7408		22	0.019425	0.253521	0.211766	1	0.817905		22	0.000496422	0.30916	0.723952	1	0.893164		22	0.000494519	0.147239	0.946123	1	0.889971		22	0.00977226	0.0471698	0.156862	1	0.762645		22
23	0.000172414	0.135029	0.997438	1	0.908655		23	0.00517241	0.160584	0.847231	1	0.769295		23	0.00714711	0.156863	0.679717	1	0.7408		23	0.019425	0.295775	0.203102	1	0.817905		23	0.00053779	0.30916	0.723796	1	0.893164		23	0.000494519	0.153374	0.941528	1	0.889971		23	0.00994222	0.0471698	0.155228	1	0.762645		23
24	0.000172414	0.148728	0.996781	1	0.908655		24	0.00586207	0.160584	0.843526	1	0.769295		24	0.00714711	0.166667	0.678585	1	0.7408		24	0.0213675	0.295775	0.188952	1	0.817905		24	0.00053779	0.311069	0.723247	1	0.893164		24	0.000576939	0.153374	0.938351	1	0.889971		24	0.010877	0.0471698	0.146269	1	0.762645		24
25	0.000172414	0.156556	0.996723	1	0.908655		25	0.00586207	0.175182	0.842603	1	0.769295		25	0.00972801	0.166667	0.569405	1	0.7408		25	0.0213675	0.309859	0.187063	1	0.817905		25	0.000579159	0.311069	0.718446	1	0.893164		25	0.000576939	0.157464	0.937143	1	0.889971		25	0.010877	0.0566038	0.141871	1	0.762645		25
26	0.000172414	0.158513	0.996485	1	0.908655		26	0.00586207	0.189781	0.841926	1	0.769295		26	0.00972801	0.176471	0.569391	1	0.7408		26	0.0221445	0.309859	0.178912	1	0.817905		26	0.000579159	0.312977	0.714077	1	0.893164		26	0.000576939	0.161554	0.930187	1	0.889971		26	0.0117267	0.0566038	0.128945	1	0.762645		26
27	0.000172414	0.162427	0.996305	1	0.908655		27	0.00637931	0.189781	0.833899	1	0.769295		27	0.0105221	0.176471	0.556302	1	0.7408		27	0.0221445	0.323944	0.178395	1	0.817905		27	0.000661896	0.312977	0.712331	1	0.893164		27	0.000741779	0.161554	0.923342	1	0.889971		27	0.0117267	0.0660377	0.127778	1	0.762645		27
28	0.000172414	0.164384	0.996048	1	0.908655		28	0.00672414	0.189781	0.831043	1	0.769295		28	0.0105221	0.186275	0.552984	1	0.7408		28	0.024864	0.323944	0.166962	1	0.817905		28	0.000661896	0.320611	0.705566	1	0.893164		28	0.000741779	0.167689	0.911659	1	0.889971		28	0.0121516	0.0660377	0.116189	1	0.762645		28
29	0.000172414	0.168297	0.996004	1	0.908655		29	0.00689655	0.189781	0.82113	1	0.769295		29	0.0113163	0.186275	0.539897	1	0.7408		29	0.024864	0.338028	0.166111	1	0.817905		29	0.000786001	0.320611	0.692808	1	0.893164		29	0.000741779	0.175869	0.905106	1	0.889971		29	0.0123215	0.0660377	0.114105	1	0.762645		29
30	0.000172414	0.170254	0.995662	1	0.908655		30	0.00724138	0.189781	0.805631	1	0.769295		30	0.0113163	0.196078	0.533109	1	0.7408		30	0.0252525	0.338028	0.165231	1	0.817905		30	0.000786001	0.326336	0.690825	1	0.893164		30	0.000741779	0.184049	0.867942	1	0.889971		30	0.0135112	0.0660377	0.0976521	1	0.762645		30
31	0.000172414	0.174168	0.995611	1	0.908655		31	0.00793103	0.189781	0.785253	1	0.769295		31	0.0150883	0.196078	0.401211	1	0.7408		31	0.0260295	0.338028	0.16484	1	0.817905		31	0.000827369	0.326336	0.689511	1	0.893164		31	0.000741779	0.188139	0.867166	1	0.889971		31	0.0136812	0.0660377	0.0966291	1	0.762645		31
32	0.000172414	0.176125	0.99545	1	0.908655		32	0.00827586	0.189781	0.784467	1	0.769295		32	0.0150883	0.205882	0.39716	1	0.7408		32	0.027972	0.338028	0.15887	1	0.817905		32	0.000827369	0.330153	0.687996	1	0.893164		32	0.000906618	0.188139	0.862593	1	0.889971		32	0.0151258	0.0660377	0.0849069	1	0.762645		32
33	0.000344828	0.176125	0.99529	1	0.908655		33	0.00827586	0.19708	0.782885	1	0.769295		33	0.0156839	0.205882	0.381236	1	0.7408		33	0.027972	0.352113	0.158621	1	0.817905		33	0.000868738	0.330153	0.685626	1	0.893164		33	0.000906618	0.192229	0.855657	1	0.889971		33	0.0151258	0.0754717	0.0848241	1	0.762645		33
34	0.000344828	0.189824	0.994162	1	0.908655		34	0.00844828	0.19708	0.782693	1	0.769295		34	0.016081	0.205882	0.380105	1	0.7408		34	0.029526	0.352113	0.150411	1	0.817905		34	0.000868738	0.332061	0.684066	1	0.893164		34	0.000906618	0.194274	0.854364	1	0.889971		34	0.0169952	0.0754717	0.0721698	1	0.762645		34
35	0.000344828	0.193738	0.994149	1	0.908655		35	0.00844828	0.20438	0.775969	1	0.769295		35	0.0174707	0.205882	0.362465	1	0.7408		35	0.029526	0.366197	0.150402	1	0.817905		35	0.000951475	0.332061	0.678395	1	0.893164		35	0.000989038	0.194274	0.854151	1	0.889971		35	0.0169952	0.0849057	0.0715723	1	0.762645		35
36	0.000344828	0.209393	0.99285	1	0.908655		36	0.0087931	0.20438	0.771337	1	0.769295		36	0.0178678	0.205882	0.354739	1	0.7408		36	0.0345765	0.366197	0.133873	1	0.817905		36	0.000951475	0.347328	0.667313	1	0.893164		36	0.00115388	0.194274	0.849159	1	0.889971		36	0.0191196	0.0849057	0.0632099	1	0.762645		36
37	0.000344828	0.213307	0.992744	1	0.908655		37	0.00913793	0.20438	0.763454	1	0.769295		37	0.0271987	0.205882	0.230529	1	0.7408		37	0.0345765	0.380282	0.133294	1	0.817905		37	0.000992843	0.347328	0.66567	1	0.893164		37	0.00115388	0.198364	0.841951	1	0.889971		37	0.0191196	0.0943396	0.0628684	1	0.762645		37
38	0.000344828	0.223092	0.992342	1	0.908655		38	0.0113793	0.20438	0.690061	1	0.769295		38	0.0271987	0.215686	0.230075	1	0.7408		38	0.034965	0.380282	0.130769	1	0.817905		38	0.000992843	0.349237	0.661583	1	0.893164		38	0.0012363	0.198364	0.830025	1	0.889971		38	0.0220938	0.160377	0.0625	1	0.762645		38
39	0.000344828	0.227006	0.992161	1	0.908655		39	0.0117241	0.20438	0.689383	1	0.769295		39	0.0305738	0.215686	0.215317	1	0.7408		39	0.034965	0.394366	0.130149	1	0.817905		39	0.00111695	0.349237	0.649667	1	0.893164		39	0.00140114	0.198364	0.809983	1	0.889971		39	0.0220938	0.169811	0.0623444	1	0.762645		39
40	0.000344828	0.228963	0.992072	1	0.908655		40	0.012069	0.20438	0.679717	1	0.769295		40	0.0309708	0.215686	0.214532	1	0.7408		40	0.0376845	0.394366	0.123746	1	0.817905		40	0.00111695	0.351145	0.645152	1	0.893164		40	0.00156598	0.198364	0.806531	1	0.889971		40	0.0241332	0.169811	0.0602528	1	0.762645		40
41	0.000344828	0.232877	0.99206	1	0.908655		41	0.012069	0.211679	0.678585	1	0.769295		41	0.032162	0.215686	0.207755	1	0.7408		41	0.0376845	0.408451	0.123295	1	0.817905		41	0.00119969	0.351145	0.642957	1	0.893164		41	0.00156598	0.200409	0.792045	1	0.889971		41	0.0241332	0.179245	0.0601568	1	0.762645		41
42	0.000344828	0.234834	0.99196	1	0.908655		42	0.0134483	0.211679	0.618161	1	0.769295		42	0.032162	0.22549	0.206013	1	0.7408		42	0.041958	0.408451	0.117592	1	0.817905		42	0.00119969	0.353053	0.64274	1	0.893164		42	0.00181324	0.200409	0.77457	1	0.889971		42	0.0257478	0.179245	0.0589667	1	0.762645		42
43	0.000344828	0.238748	0.99182	1	0.908655		43	0.0134483	0.218978	0.617668	1	0.769295		43	0.0339488	0.22549	0.199053	1	0.7408		43	0.041958	0.422535	0.116693	1	0.817905		43	0.00132379	0.353053	0.642018	1	0.893164		43	0.00181324	0.202454	0.774122	1	0.889971		43	0.0257478	0.188679	0.0586899	1	0.762645		43
44	0.000344828	0.242661	0.990871	1	0.908655		44	0.0137931	0.218978	0.608373	1	0.769295		44	0.0339488	0.235294	0.198467	1	0.7408		44	0.0446775	0.422535	0.104694	1	0.817905		44	0.00132379	0.358779	0.638115	1	0.893164		44	0.00189566	0.202454	0.773848	1	0.889971		44	0.0271074	0.188679	0.0568649	1	0.762645		44
45	0.000344828	0.246575	0.990397	1	0.908655		45	0.0137931	0.226277	0.60108	1	0.769295		45	0.0379194	0.235294	0.173613	1	0.7408		45	0.0446775	0.43662	0.104246	1	0.817905		45	0.0014479	0.358779	0.634807	1	0.893164		45	0.00189566	0.206544	0.756167	1	0.889971		45	0.0271074	0.207547	0.0568227	1	0.762645		45
46	0.000344828	0.25636	0.987231	1	0.908655		46	0.0153448	0.226277	0.569405	1	0.769295		46	0.0379194	0.245098	0.173285	1	0.7408		46	0.0520591	0.43662	0.0972412	1	0.817905		46	0.0014479	0.364504	0.632126	1	0.893164		46	0.0020605	0.206544	0.755163	1	0.889971		46	0.0311863	0.207547	0.0544617	1	0.762645		46
47	0.000517241	0.25636	0.986736	1	0.908655		47	0.0153448	0.233577	0.569391	1	0.769295		47	0.0399047	0.245098	0.165231	1	0.7408		47	0.0520591	0.450704	0.0970104	1	0.817905		47	0.00148926	0.364504	0.631727	1	0.893164		47	0.00214292	0.206544	0.754591	1	0.889971		47	0.0311863	0.216981	0.0544157	1	0.762645		47
48	0.000517241	0.277886	0.98186	1	0.908655		48	0.0160345	0.233577	0.556302	1	0.769295		48	0.0403018	0.245098	0.16484	1	0.7408		48	0.0578866	0.450704	0.091644	1	0.817905		48	0.00148926	0.366412	0.631421	1	0.893164		48	0.00214292	0.210634	0.729805	1	0.889971		48	0.0312712	0.216981	0.0544084	1	0.762645		48
49	0.000689655	0.277886	0.981222	1	0.908655		49	0.0160345	0.240876	0.552984	1	0.769295		49	0.0464562	0.245098	0.144995	1	0.7408		49	0.0578866	0.464789	0.0915413	1	0.817905		49	0.00153063	0.366412	0.629735	1	0.893164		49	0.00222534	0.210634	0.708362	1	0.889971		49	0.0312712	0.226415	0.0543311	1	0.762645		49
50	0.000689655	0.293542	0.9777	1	0.908655		50	0.0231034	0.240876	0.398419	1	0.769295		50	0.0464562	0.254902	0.143578	1	0.7408		50	0.0687646	0.464789	0.0827185	1	0.817905		50	0.00153063	0.368321	0.629464	1	0.893164		50	0.00222534	0.212679	0.70831	1	0.889971		50	0.0319511	0.226415	0.0540378	1	0.762645		50
51	0.000689655	0.297456	0.977311	1	0.908655		51	0.0231034	0.248175	0.39716	1	0.769295		51	0.0478459	0.254902	0.138811	1	0.7408		51	0.0687646	0.478873	0.082078	1	0.817905		51	0.00161337	0.368321	0.623674	1	0.893164		51	0.00230776	0.212679	0.704923	1	0.889971		51	0.032121	0.226415	0.054024	1	0.762645		51
52	0.000689655	0.303327	0.974503	1	0.908655		52	0.0234483	0.248175	0.394294	1	0.769295		52	0.048243	0.254902	0.137787	1	0.7408		52	0.0730381	0.478873	0.0786436	1	0.817905		52	0.00161337	0.370229	0.621994	1	0.893164		52	0.00230776	0.216769	0.69687	1	0.889971		52	0.0324609	0.226415	0.0539299	1	0.762645		52
53	0.000689655	0.307241	0.974466	1	0.908655		53	0.0234483	0.255474	0.391226	1	0.769295		53	0.0502283	0.254902	0.133873	1	0.7408		53	0.0730381	0.492958	0.07863	1	0.817905		53	0.00165474	0.370229	0.621678	1	0.893164		53	0.00230776	0.218814	0.681354	1	0.889971		53	0.0324609	0.235849	0.0538915	1	0.762645		53
54	0.000689655	0.311155	0.973486	1	0.908655		54	0.0237931	0.255474	0.381236	1	0.769295		54	0.0502283	0.264706	0.133294	1	0.7408		54	0.0757576	0.492958	0.0761288	1	0.817905		54	0.00165474	0.387405	0.60542	1	0.893164		54	0.00239018	0.218814	0.679708	1	0.889971		54	0.0333956	0.235849	0.0532144	1	0.762645		54
55	0.000689655	0.315068	0.97275	1	0.908655		55	0.0241379	0.255474	0.380105	1	0.769295		55	0.0504268	0.264706	0.132693	1	0.7408		55	0.0757576	0.507042	0.075954	1	0.817905		55	0.00190295	0.387405	0.602006	1	0.893164		55	0.00255502	0.218814	0.677485	1	0.889971		55	0.0333956	0.245283	0.0532034	1	0.762645		55
56	0.000689655	0.320939	0.972275	1	0.908655		56	0.0255172	0.255474	0.367938	1	0.769295		56	0.0504268	0.27451	0.130956	1	0.7408		56	0.0800311	0.507042	0.0743417	1	0.817905		56	0.00190295	0.39313	0.600735	1	0.893164		56	0.00255502	0.220859	0.673182	1	0.889971		56	0.0348402	0.245283	0.0521813	1	0.762645		56
57	0.000862069	0.320939	0.970936	1	0.908655		57	0.0255172	0.270073	0.367317	1	0.769295		57	0.0534048	0.27451	0.123746	1	0.7408		57	0.0800311	0.521127	0.0743333	1	0.817905		57	0.00194432	0.39313	0.60009	1	0.893164		57	0.00271985	0.220859	0.671837	1	0.889971		57	0.0350102	0.245283	0.0519172	1	0.762645		57
58	0.000862069	0.322896	0.970321	1	0.908655		58	0.0258621	0.270073	0.362424	1	0.769295		58	0.0534048	0.284314	0.123642	1	0.7408		58	0.0843046	0.521127	0.0716567	1	0.817905		58	0.00194432	0.395038	0.598347	1	0.893164		58	0.00271985	0.222904	0.667045	1	0.889971		58	0.0355201	0.245283	0.0514436	1	0.762645		58
59	0.000862069	0.32681	0.969784	1	0.908655		59	0.0262069	0.270073	0.354739	1	0.769295		59	0.0536033	0.284314	0.123346	1	0.7408		59	0.0850816	0.521127	0.0713027	1	0.817905		59	0.00202705	0.395038	0.597197	1	0.893164		59	0.00296711	0.222904	0.647397	1	0.889971		59	0.03569	0.245283	0.0514158	1	0.762645		59
60	0.000862069	0.330724	0.969728	1	0.908655		60	0.032931	0.270073	0.275415	1	0.769295		60	0.0536033	0.294118	0.123295	1	0.7408		60	0.0905206	0.521127	0.0687132	1	0.817905		60	0.00202705	0.402672	0.590941	1	0.893164		60	0.00313195	0.222904	0.646606	1	0.889971		60	0.0381543	0.245283	0.049373	1	0.762645		60
61	0.000862069	0.338552	0.969091	1	0.908655		61	0.032931	0.277372	0.275087	1	0.769295		61	0.057971	0.294118	0.113741	1	0.7408		61	0.0912976	0.521127	0.0686096	1	0.817905		61	0.00215116	0.402672	0.58773	1	0.893164		61	0.00313195	0.224949	0.644568	1	0.889971		61	0.0381543	0.254717	0.0493651	1	0.762645		61
62	0.00103448	0.338552	0.968165	1	0.908655		62	0.0362069	0.277372	0.251192	1	0.769295		62	0.0583681	0.294118	0.113019	1	0.7408		62	0.0940171	0.521127	0.0672535	1	0.817905		62	0.00215116	0.40458	0.586707	1	0.893164		62	0.00313195	0.229039	0.643545	1	0.889971		62	0.0471618	0.254717	0.0446749	1	0.762645		62
63	0.00103448	0.342466	0.963044	1	0.908655		63	0.0362069	0.291971	0.251078	1	0.769295		63	0.0589637	0.294118	0.112329	1	0.7408		63	0.0940171	0.535211	0.0671037	1	0.817905		63	0.00227527	0.40458	0.582389	1	0.893164		63	0.00313195	0.231084	0.639127	1	0.889971		63	0.0471618	0.264151	0.0446662	1	0.762645		63
64	0.0012069	0.342466	0.962759	1	0.908655		64	0.0362069	0.29927	0.25093	1	0.769295		64	0.0589637	0.313725	0.111413	1	0.7408		64	0.0944056	0.535211	0.0667884	1	0.817905		64	0.00227527	0.406489	0.581511	1	0.893164		64	0.00321437	0.231084	0.637097	1	0.889971		64	0.0525153	0.264151	0.0428194	1	0.762645		64
65	0.0012069	0.348337	0.959045	1	0.908655		65	0.0363793	0.29927	0.250727	1	0.769295		65	0.0659122	0.313725	0.0972412	1	0.7408		65	0.0944056	0.549296	0.0667236	1	0.817905		65	0.00231663	0.406489	0.580759	1	0.893164		65	0.00321437	0.233129	0.629431	1	0.889971		65	0.0525153	0.273585	0.0428088	1	0.762645		65
66	0.0012069	0.35225	0.957707	1	0.908655		66	0.0363793	0.306569	0.250377	1	0.769295		66	0.0659122	0.323529	0.0970104	1	0.7408		66	0.102953	0.549296	0.0628039	1	0.817905		66	0.00231663	0.408397	0.57845	1	0.893164		66	0.00337921	0.233129	0.617947	1	0.889971		66	0.0545547	0.273585	0.0421651	1	0.762645		66
67	0.0012069	0.354207	0.955704	1	0.908655		67	0.0375862	0.306569	0.241858	1	0.769295		67	0.0671034	0.323529	0.0952783	1	0.7408		67	0.173271	0.619718	0.0625	1	0.817905		67	0.002358	0.408397	0.578313	1	0.893164		67	0.00337921	0.237219	0.604129	1	0.889971		67	0.0545547	0.283019	0.0421564	1	0.762645		67
68	0.0012069	0.358121	0.954156	1	0.908655		68	0.037931	0.306569	0.24057	1	0.769295		68	0.0671034	0.333333	0.0952151	1	0.7408		68	0.182207	0.619718	0.0619223	1	0.817905		68	0.002358	0.416031	0.574117	1	0.893164		68	0.00362647	0.237219	0.567781	1	0.889971		68	0.0557444	0.283019	0.0418494	1	0.762645		68
69	0.00137931	0.358121	0.95371	1	0.908655		69	0.042931	0.306569	0.215317	1	0.769295		69	0.0730594	0.333333	0.0893016	1	0.7408		69	0.182207	0.633803	0.0619218	1	0.817905		69	0.00248211	0.416031	0.572768	1	0.893164		69	0.00362647	0.239264	0.565199	1	0.889971		69	0.0559143	0.283019	0.0418371	1	0.762645		69
70	0.00137931	0.362035	0.951645	1	0.908655		70	0.0432759	0.306569	0.214532	1	0.769295		70	0.0730594	0.343137	0.0892966	1	0.7408		70	0.182984	0.633803	0.0618771	1	0.817905		70	0.00248211	0.417939	0.571444	1	0.893164		70	0.00379131	0.239264	0.536058	1	0.889971		70	0.0582937	0.283019	0.0409525	1	0.762645		70
71	0.00155172	0.362035	0.950462	1	0.908655		71	0.0446552	0.306569	0.207755	1	0.769295		71	0.0806035	0.343137	0.0811558	1	0.7408		71	0.182984	0.647887	0.0618402	1	0.817905		71	0.00252348	0.417939	0.571314	1	0.893164		71	0.00379131	0.241309	0.533762	1	0.889971		71	0.0582937	0.292453	0.0409525	1	0.762645		71
72	0.00155172	0.363992	0.948628	1	0.908655		72	0.0446552	0.313869	0.206013	1	0.769295		72	0.0806035	0.352941	0.081051	1	0.7408		72	0.184149	0.647887	0.0617554	1	0.817905		72	0.00252348	0.419847	0.570827	1	0.893164		72	0.00403857	0.241309	0.515216	1	0.889971		72	0.0586336	0.292453	0.040849	1	0.762645		72
73	0.00172414	0.363992	0.947443	1	0.908655		73	0.0455172	0.313869	0.204249	1	0.769295		73	0.0829859	0.352941	0.0787577	1	0.7408		73	0.184149	0.661972	0.0617233	1	0.817905		73	0.00256485	0.419847	0.57029	1	0.893164		73	0.00403857	0.243354	0.510708	1	0.889971		73	0.0586336	0.301887	0.0408048	1	0.762645		73
74	0.00172414	0.365949	0.946371	1	0.908655		74	0.0455172	0.321168	0.202885	1	0.769295		74	0.0829859	0.362745	0.0786636	1	0.7408		74	0.192696	0.661972	0.0609589	1	0.817905		74	0.00256485	0.425573	0.566777	1	0.893164		74	0.00403857	0.247444	0.51019	1	0.889971		74	0.0616927	0.301887	0.03986	1	0.762645		74
75	0.00172414	0.377691	0.944118	1	0.908655		75	0.0458621	0.321168	0.200763	1	0.769295		75	0.089736	0.362745	0.071772	1	0.7408		75	0.192696	0.676056	0.060946	1	0.817905		75	0.00260621	0.425573	0.566528	1	0.893164		75	0.00412099	0.247444	0.480883	1	0.889971		75	0.0616927	0.311321	0.0398273	1	0.762645		75
76	0.00172414	0.381605	0.943416	1	0.908655		76	0.0462069	0.321168	0.200318	1	0.769295		76	0.090133	0.362745	0.0713027	1	0.7408		76	0.195027	0.676056	0.0607538	1	0.817905		76	0.00260621	0.427481	0.566094	1	0.893164		76	0.00412099	0.251534	0.435263	1	0.889971		76	0.0617777	0.311321	0.0397481	1	0.762645		76
77	0.00189655	0.381605	0.942656	1	0.908655		77	0.0465517	0.321168	0.199053	1	0.769295		77	0.0907286	0.362745	0.0707744	1	0.7408		77	0.195027	0.690141	0.0607206	1	0.817905		77	0.00264758	0.427481	0.565297	1	0.893164		77	0.00445067	0.251534	0.416648	1	0.889971		77	0.0621176	0.311321	0.0396882	1	0.762645		77
78	0.00189655	0.389432	0.937883	1	0.908655		78	0.0465517	0.328467	0.198467	1	0.769295		78	0.0911257	0.362745	0.0706129	1	0.7408		78	0.213287	0.690141	0.0593001	1	0.817905		78	0.00264758	0.429389	0.564796	1	0.893164		78	0.00445067	0.253579	0.401352	1	0.889971		78	0.0656016	0.311321	0.0386682	1	0.762645		78
79	0.00189655	0.399217	0.931984	1	0.908655		79	0.0513793	0.328467	0.173613	1	0.769295		79	0.0937066	0.362745	0.0687132	1	0.7408		79	0.213287	0.704225	0.0592928	1	0.817905		79	0.00273032	0.429389	0.564439	1	0.893164		79	0.00527487	0.253579	0.385343	1	0.889971		79	0.0656016	0.320755	0.0386604	1	0.762645		79
80	0.00189655	0.403131	0.926675	1	0.908655		80	0.0513793	0.335766	0.173285	1	0.769295		80	0.0941036	0.362745	0.0686096	1	0.7408		80	0.221445	0.704225	0.0584455	1	0.817905		80	0.00273032	0.431298	0.564043	1	0.893164		80	0.00527487	0.257669	0.368739	1	0.889971		80	0.0674711	0.320755	0.0383106	1	0.762645		80
81	0.00189655	0.405088	0.926264	1	0.908655		81	0.052069	0.335766	0.171804	1	0.769295		81	0.0968831	0.362745	0.0667884	1	0.7408		81	0.221445	0.71831	0.0584052	1	0.817905		81	0.00289579	0.431298	0.557813	1	0.893164		81	0.00543971	0.257669	0.365322	1	0.889971		81	0.0674711	0.330189	0.0383036	1	0.762645		81
82	0.00224138	0.405088	0.925095	1	0.908655		82	0.0524138	0.335766	0.170836	1	0.769295		82	0.0968831	0.372549	0.0667236	1	0.7408		82	0.254468	0.71831	0.0543756	1	0.817905		82	0.00289579	0.433206	0.556828	1	0.893164		82	0.00543971	0.261759	0.364965	1	0.889971		82	0.0702753	0.330189	0.0376722	1	0.762645		82
83	0.00224138	0.409002	0.924983	1	0.908655		83	0.0536207	0.335766	0.166942	1	0.769295		83	0.102243	0.372549	0.0626479	1	0.7408		83	0.254468	0.732394	0.0543568	1	0.817905		83	0.00297853	0.433206	0.55469	1	0.893164		83	0.00585181	0.261759	0.341476	1	0.889971		83	0.0702753	0.339623	0.0376386	1	0.762645		83
84	0.00224138	0.410959	0.924481	1	0.908655		84	0.0536207	0.343066	0.166111	1	0.769295		84	0.142744	0.421569	0.0625	1	0.7408		84	0.258353	0.732394	0.0539527	1	0.817905		84	0.00297853	0.437023	0.553355	1	0.893164		84	0.00585181	0.265849	0.341399	1	0.889971		84	0.0718049	0.339623	0.0373229	1	0.762645		84
85	0.00241379	0.410959	0.921081	1	0.908655		85	0.0537931	0.343066	0.165231	1	0.769295		85	0.1487	0.421569	0.0618567	1	0.7408		85	0.258353	0.746479	0.0539407	1	0.817905		85	0.00306127	0.437023	0.552431	1	0.893164		85	0.00585181	0.269939	0.334074	1	0.889971		85	0.0719748	0.339623	0.0372841	1	0.762645		85
86	0.00241379	0.424658	0.911148	1	0.908655		86	0.0541379	0.343066	0.16484	1	0.769295		86	0.1487	0.431373	0.0618402	1	0.7408		86	0.25913	0.746479	0.0538555	1	0.817905		86	0.00306127	0.438931	0.550628	1	0.893164		86	0.00601665	0.269939	0.323604	1	0.889971		86	0.0734194	0.339623	0.0368166	1	0.762645		86
87	0.00275862	0.424658	0.910799	1	0.908655		87	0.0558621	0.343066	0.160958	1	0.769295		87	0.149692	0.431373	0.0617315	1	0.7408		87	0.25913	0.760563	0.0537948	1	0.817905		87	0.00310264	0.438931	0.549397	1	0.893164		87	0.00601665	0.271984	0.321151	1	0.889971		87	0.0734194	0.349057	0.0368128	1	0.762645		87
88	0.00275862	0.428571	0.908326	1	0.908655		88	0.0558621	0.350365	0.160765	1	0.769295		88	0.149692	0.441176	0.0617233	1	0.7408		88	0.266123	0.760563	0.0531583	1	0.817905		88	0.00310264	0.44084	0.548533	1	0.893164		88	0.00609907	0.271984	0.311154	1	0.889971		88	0.074864	0.349057	0.0364721	1	0.762645		88
89	0.00293103	0.428571	0.906311	1	0.908655		89	0.057931	0.350365	0.153749	1	0.769295		89	0.150288	0.441176	0.0616678	1	0.7408		89	0.266123	0.774648	0.0531476	1	0.817905		89	0.003144	0.44084	0.547072	1	0.893164		89	0.00609907	0.276074	0.305424	1	0.889971		89	0.075034	0.349057	0.0364662	1	0.762645		89
90	0.00293103	0.430528	0.905114	1	0.908655		90	0.0582759	0.350365	0.153576	1	0.769295		90	0.150288	0.45098	0.0616631	1	0.7408		90	0.27972	0.774648	0.0512045	1	0.817905		90	0.003144	0.444656	0.546104	1	0.893164		90	0.00618149	0.276074	0.305403	1	0.889971		90	0.0759687	0.349057	0.036251	1	0.762645		90
91	0.00293103	0.434442	0.904701	1	0.908655		91	0.0610345	0.350365	0.144995	1	0.769295		91	0.153266	0.45098	0.061414	1	0.7408		91	0.27972	0.788732	0.0511357	1	0.817905		91	0.00322674	0.444656	0.545278	1	0.893164		91	0.00618149	0.280164	0.294926	1	0.889971		91	0.0761387	0.349057	0.0362392	1	0.762645		91
92	0.00327586	0.434442	0.903393	1	0.908655		92	0.0610345	0.357664	0.143578	1	0.769295		92	0.153266	0.460784	0.0613922	1	0.7408		92	0.28244	0.788732	0.0508656	1	0.817905		92	0.00322674	0.448473	0.544876	1	0.893164		92	0.00684085	0.280164	0.271476	1	0.889971		92	0.0767335	0.349057	0.0359691	1	0.762645		92
93	0.00327586	0.436399	0.903038	1	0.908655		93	0.0631034	0.357664	0.138811	1	0.769295		93	0.156839	0.460784	0.0609931	1	0.7408		93	0.28244	0.802817	0.0508321	1	0.817905		93	0.00330948	0.448473	0.544651	1	0.893164		93	0.00684085	0.282209	0.265596	1	0.889971		93	0.0769035	0.349057	0.0359215	1	0.762645		93
94	0.00344828	0.436399	0.896693	1	0.908655		94	0.0634483	0.357664	0.137787	1	0.769295		94	0.156839	0.470588	0.060946	1	0.7408		94	0.321678	0.802817	0.045181	1	0.817905		94	0.00330948	0.450382	0.543915	1	0.893164		94	0.00692327	0.282209	0.257473	1	0.889971		94	0.0835316	0.349057	0.0343256	1	0.762645		94
95	0.00344828	0.438356	0.894877	1	0.908655		95	0.0658621	0.357664	0.133873	1	0.769295		95	0.165972	0.470588	0.0598863	1	0.7408		95	0.321678	0.816901	0.0451731	1	0.817905		95	0.00335085	0.450382	0.543744	1	0.893164		95	0.00692327	0.284254	0.25697	1	0.889971		95	0.0837016	0.349057	0.0343208	1	0.762645		95
96	0.00362069	0.438356	0.893979	1	0.908655		96	0.0658621	0.364964	0.133294	1	0.769295		96	0.165972	0.480392	0.0598572	1	0.7408		96	0.339938	0.816901	0.0428012	1	0.817905		96	0.00335085	0.45229	0.542492	1	0.893164		96	0.00750021	0.284254	0.228125	1	0.889971		96	0.0844663	0.349057	0.0341961	1	0.762645		96
97	0.00362069	0.440313	0.892609	1	0.908655		97	0.0660345	0.364964	0.132693	1	0.769295		97	0.174707	0.480392	0.0585104	1	0.7408		97	0.340715	0.816901	0.0427591	1	0.817905		97	0.00339221	0.45229	0.542285	1	0.893164		97	0.00750021	0.288344	0.225448	1	0.889971		97	0.0844663	0.358491	0.0341876	1	0.762645		97
98	0.00396552	0.440313	0.888193	1	0.908655		98	0.0660345	0.372263	0.130956	1	0.769295		98	0.174707	0.490196	0.0584052	1	0.7408		98	0.456099	0.816901	0.0310117	1	0.817905		98	0.00339221	0.454198	0.541936	1	0.893164		98	0.00766505	0.288344	0.219756	1	0.889971		98	0.0885452	0.358491	0.0333827	1	0.762645		98
99	0.00396552	0.444227	0.883702	1	0.908655		99	0.0663793	0.372263	0.130443	1	0.769295		99	0.179472	0.490196	0.0577634	1	0.7408		99	0.456099	0.830986	0.0310083	1	0.817905		99	0.00359906	0.454198	0.53899	1	0.893164		99	0.00815956	0.288344	0.210439	1	0.889971		99	0.0885452	0.367925	0.0333423	1	0.762645		99
100	0.00396552	0.448141	0.881897	1	0.908655		100	0.0663793	0.379562	0.130149	1	0.769295		100	0.179472	0.5	0.0577612	1	0.7408		100	0.463869	0.830986	0.0300152	1	0.817905		100	0.00359906	0.456107	0.536917	1	0.893164		100	0.00815956	0.290389	0.210244	1	0.889971		100	0.0954283	0.367925	0.0318903	1	0.762645		100
101	0.00396552	0.450098	0.87721	1	0.908655		101	0.0696552	0.379562	0.123722	1	0.769295		101	0.194163	0.5	0.0552748	1	0.7408		101	0.463869	0.84507	0.0299978	1	0.817905		101	0.00364043	0.456107	0.536503	1	0.893164		101	0.0083244	0.290389	0.203397	1	0.889971		101	0.0954283	0.377358	0.0318761	1	0.762645		101
102	0.00413793	0.450098	0.875171	1	0.908655		102	0.0696552	0.386861	0.123642	1	0.769295		102	0.19456	0.5	0.0552416	1	0.7408		102	0.475136	0.84507	0.0290099	1	0.817905		102	0.00364043	0.459924	0.536271	1	0.893164		102	0.00848924	0.290389	0.195801	1	0.889971		102	0.0967879	0.377358	0.0316696	1	0.762645		102
103	0.00413793	0.452055	0.873066	1	0.908655		103	0.0698276	0.386861	0.123346	1	0.769295		103	0.201707	0.5	0.0539527	1	0.7408		103	0.475136	0.859155	0.0290087	1	0.817905		103	0.00372316	0.459924	0.535632	1	0.893164		103	0.00848924	0.292434	0.195143	1	0.889971		103	0.0969579	0.377358	0.0316135	1	0.762645		103
104	0.00413793	0.455969	0.870453	1	0.908655		104	0.0698276	0.394161	0.123295	1	0.769295		104	0.201707	0.509804	0.0539407	1	0.7408		104	0.482906	0.859155	0.028382	1	0.817905		104	0.00372316	0.46374	0.535189	1	0.893164		104	0.0091486	0.292434	0.176724	1	0.889971		104	0.10639	0.377358	0.0298983	1	0.762645		104
105	0.00431034	0.455969	0.869493	1	0.908655		105	0.0743103	0.394161	0.113416	1	0.769295		105	0.2027	0.509804	0.0537951	1	0.7408		105	0.482906	0.873239	0.0283811	1	0.817905		105	0.0038059	0.46374	0.534101	1	0.893164		105	0.0091486	0.294479	0.174753	1	0.889971		105	0.10639	0.386792	0.0298916	1	0.762645		105
106	0.00431034	0.46184	0.867855	1	0.908655		106	0.0746552	0.394161	0.113019	1	0.769295		106	0.2027	0.519608	0.0537948	1	0.7408		106	0.521368	0.873239	0.0253184	1	0.817905		106	0.0038059	0.465649	0.530982	1	0.893164		106	0.00964312	0.294479	0.168061	1	0.889971		106	0.10707	0.386792	0.0298248	1	0.762645		106
107	0.00431034	0.46771	0.86333	1	0.908655		107	0.0753448	0.394161	0.111419	1	0.769295		107	0.206869	0.519608	0.0531651	1	0.7408		107	0.521368	0.887324	0.0252408	1	0.817905		107	0.00397137	0.465649	0.528909	1	0.893164		107	0.00964312	0.296524	0.167533	1	0.889971		107	0.10707	0.396226	0.0298216	1	0.762645		107
108	0.005	0.46771	0.853697	1	0.908655		108	0.0753448	0.40146	0.111413	1	0.769295		108	0.206869	0.529412	0.0531476	1	0.7408		108	0.557498	0.887324	0.0227573	1	0.817905		108	0.00397137	0.467557	0.528768	1	0.893164		108	0.0101376	0.296524	0.159371	1	0.889971		108	0.109959	0.396226	0.0293495	1	0.762645		108
109	0.005	0.471624	0.849114	1	0.908655		109	0.0843103	0.40146	0.0972412	1	0.769295		109	0.207266	0.529412	0.0531209	1	0.7408		109	0.557498	0.901408	0.0227147	1	0.817905		109	0.00409548	0.467557	0.527784	1	0.893164		109	0.0101376	0.298569	0.158247	1	0.889971		109	0.109959	0.40566	0.0293177	1	0.762645		109
110	0.005	0.475538	0.848356	1	0.908655		110	0.0843103	0.408759	0.0970104	1	0.769295		110	0.207663	0.529412	0.0530741	1	0.7408		110	0.568376	0.901408	0.0215009	1	0.817905		110	0.00409548	0.471374	0.52699	1	0.893164		110	0.0102201	0.298569	0.156862	1	0.889971		110	0.111659	0.40566	0.0290315	1	0.762645		110
111	0.00517241	0.475538	0.847231	1	0.908655		111	0.0855172	0.408759	0.0952783	1	0.769295		111	0.210641	0.529412	0.0525201	1	0.7408		111	0.568376	0.915493	0.0214979	1	0.817905		111	0.00417822	0.471374	0.526199	1	0.893164		111	0.0103849	0.298569	0.155228	1	0.889971		111	0.111659	0.415094	0.0290207	1	0.762645		111
112	0.00586207	0.475538	0.843526	1	0.908655		112	0.0855172	0.416058	0.0952151	1	0.769295		112	0.210641	0.539216	0.0524408	1	0.7408		112	0.574592	0.915493	0.02112	1	0.817905		112	0.00417822	0.473282	0.52615	1	0.893164		112	0.0112915	0.298569	0.146269	1	0.889971		112	0.119731	0.415094	0.0277341	1	0.762645		112
113	0.00586207	0.479452	0.842603	1	0.908655		113	0.092069	0.416058	0.0893016	1	0.769295		113	0.215605	0.539216	0.0516266	1	0.7408		113	0.574592	0.929577	0.021096	1	0.817905		113	0.00421958	0.473282	0.526116	1	0.893164		113	0.0112915	0.302658	0.141871	1	0.889971		113	0.119731	0.424528	0.0277316	1	0.762645		113
114	0.00586207	0.483366	0.841926	1	0.908655		114	0.092069	0.423358	0.0892966	1	0.769295		114	0.215605	0.54902	0.0516177	1	0.7408		114	0.65035	0.929577	0.0158613	1	0.817905		114	0.00421958	0.475191	0.525726	1	0.893164		114	0.0113739	0.302658	0.141212	1	0.889971		114	0.119816	0.424528	0.0277225	1	0.762645		114
115	0.00586207	0.489237	0.8387	1	0.908655		115	0.0958621	0.423358	0.0857048	1	0.769295		115	0.2162	0.54902	0.0515392	1	0.7408		115	0.65035	0.943662	0.0158314	1	0.817905		115	0.00438506	0.475191	0.523293	1	0.893164		115	0.0113739	0.306748	0.140754	1	0.889971		115	0.119986	0.424528	0.0277078	1	0.762645		115
116	0.00603448	0.489237	0.837464	1	0.908655		116	0.0962069	0.423358	0.0856444	1	0.769295		116	0.2162	0.558824	0.0515296	1	0.7408		116	0.663947	0.943662	0.0150217	1	0.817905		116	0.00438506	0.477099	0.523277	1	0.893164		116	0.0115388	0.306748	0.13847	1	0.889971		116	0.120156	0.424528	0.0276853	1	0.762645		116
117	0.00603448	0.491194	0.837438	1	0.908655		117	0.100172	0.423358	0.0821039	1	0.769295		117	0.220369	0.558824	0.0508656	1	0.7408		117	0.663947	0.957746	0.0150084	1	0.817905		117	0.00463327	0.477099	0.520166	1	0.893164		117	0.0115388	0.308793	0.137254	1	0.889971		117	0.120326	0.424528	0.0276819	1	0.762645		117
118	0.0062069	0.491194	0.836493	1	0.908655		118	0.100172	0.430657	0.082078	1	0.769295		118	0.220369	0.568627	0.0508321	1	0.7408		118	0.729215	0.957746	0.0116022	1	0.817905		118	0.00463327	0.480916	0.51948	1	0.893164		118	0.0121981	0.308793	0.128945	1	0.889971		118	0.123046	0.424528	0.0272201	1	0.762645		118
119	0.0062069	0.495108	0.834939	1	0.908655		119	0.101207	0.430657	0.0811558	1	0.769295		119	0.226722	0.568627	0.0494894	1	0.7408		119	0.729215	0.971831	0.0115759	1	0.817905		119	0.00467464	0.480916	0.519208	1	0.893164		119	0.0121981	0.310838	0.127778	1	0.889971		119	0.123046	0.433962	0.0272117	1	0.762645		119
120	0.00637931	0.495108	0.833899	1	0.908655		120	0.101207	0.437956	0.081051	1	0.769295		120	0.226722	0.578431	0.04945	1	0.7408		120	0.835276	0.971831	0.00683492	1	0.817905		120	0.00467464	0.482824	0.518798	1	0.893164		120	0.0122806	0.310838	0.12338	1	0.889971		120	0.12432	0.433962	0.0270832	1	0.762645		120
121	0.00672414	0.495108	0.831043	1	0.908655		121	0.101897	0.437956	0.0804516	1	0.769295		121	0.252333	0.578431	0.045181	1	0.7408		121	0.835276	0.985915	0.0068079	1	0.817905		121	0.00479874	0.482824	0.517486	1	0.893164		121	0.0122806	0.312883	0.121366	1	0.889971		121	0.12449	0.433962	0.0270693	1	0.762645		121
122	0.00672414	0.497065	0.82179	1	0.908655		122	0.101897	0.445255	0.0804279	1	0.769295		122	0.252333	0.588235	0.0451731	1	0.7408		122	0.8446	0.985915	0.00646755	1	0.817905		122	0.00479874	0.484733	0.516626	1	0.893164		122	0.012363	0.312883	0.120806	1	0.889971		122	0.126275	0.433962	0.0268226	1	0.762645		122
123	0.00689655	0.497065	0.82113	1	0.908655		123	0.103966	0.445255	0.0786751	1	0.769295		123	0.275958	0.588235	0.0416602	1	0.7408		123	0.845377	0.985915	0.00645159	1	0.817905		123	0.00488148	0.484733	0.515928	1	0.893164		123	0.0125278	0.312883	0.119504	1	0.889971		123	0.126275	0.443396	0.0268084	1	0.762645		123
124	0.00689655	0.500978	0.812591	1	0.908655		124	0.103966	0.452555	0.0786636	1	0.769295		124	0.276355	0.588235	0.0416551	1	0.7408		124	0.919969	0.985915	0.00356337	1	0.817905		124	0.00488148	0.486641	0.515467	1	0.893164		124	0.0128575	0.312883	0.116189	1	0.889971		124	0.127294	0.443396	0.0266587	1	0.762645		124
125	0.00689655	0.504892	0.80753	1	0.908655		125	0.112241	0.452555	0.0716567	1	0.769295		125	0.288664	0.588235	0.0402334	1	0.7408		125	0.919969	1	0.00355655	1	0.817905		125	0.00529516	0.486641	0.51346	1	0.893164		125	0.0128575	0.314928	0.116095	1	0.889971		125	0.127464	0.443396	0.0266549	1	0.762645		125
126	0.00724138	0.504892	0.805631	1	0.908655		126	0.112586	0.452555	0.0713027	1	0.769295		126	0.288664	0.598039	0.0401955	1	0.7408		126	1	1	0.000209735	1	0.817905		126	0.00529516	0.494275	0.511986	1	0.893164		126	0.0130223	0.314928	0.114105	1	0.889971		126	0.130354	0.443396	0.0262914	1	0.762645		126
127	0.00724138	0.510763	0.794615	1	0.908655		127	0.113448	0.452555	0.0707744	1	0.769295		127	0.298987	0.598039	0.0390399	1	0.7408		0	0	0	1.99575	2	0.790421		127	0.00570885	0.494275	0.50995	1	0.893164		127	0.0131872	0.314928	0.113258	1	0.889971		127	0.130354	0.45283	0.0262551	1	0.762645		127
128	0.00758621	0.510763	0.790141	1	0.908655		128	0.113793	0.452555	0.0706129	1	0.769295		128	0.298987	0.607843	0.0390039	1	0.7408		1	0	0.00854701	0.995753	2	0.790421		128	0.00570885	0.496183	0.509805	1	0.893164		128	0.0131872	0.316973	0.113097	1	0.889971		128	0.133413	0.45283	0.0257536	1	0.762645		128
129	0.00758621	0.514677	0.78997	1	0.908655		129	0.116552	0.452555	0.0687132	1	0.769295		129	0.30276	0.607843	0.0383874	1	0.7408		2	0.00039557	0.00854701	0.995589	2	0.790421		129	0.00575022	0.496183	0.509448	1	0.893164		129	0.0132696	0.316973	0.110443	1	0.889971		129	0.133413	0.462264	0.0257426	1	0.762645		129
130	0.00758621	0.516634	0.787638	1	0.908655		130	0.116897	0.452555	0.0686096	1	0.769295		130	0.303157	0.607843	0.0383808	1	0.7408		3	0.00039557	0.025641	0.98487	2	0.790421		130	0.00575022	0.498092	0.509338	1	0.893164		130	0.0132696	0.319018	0.108129	1	0.889971		130	0.135792	0.462264	0.0253688	1	0.762645		130
131	0.00793103	0.516634	0.785253	1	0.908655		131	0.119138	0.452555	0.0672535	1	0.769295		131	0.311296	0.607843	0.0371889	1	0.7408		4	0.00039557	0.042735	0.942148	2	0.790421		131	0.00583295	0.498092	0.508622	1	0.893164		131	0.0135169	0.319018	0.104533	1	0.889971		131	0.135962	0.462264	0.0253481	1	0.762645		131
132	0.00827586	0.516634	0.784467	1	0.908655		132	0.119138	0.459854	0.0671037	1	0.769295		132	0.311296	0.617647	0.0371825	1	0.7408		5	0.00039557	0.0512821	0.925869	2	0.790421		132	0.00583295	0.5	0.508421	1	0.893164		132	0.0135169	0.321063	0.103286	1	0.889971		132	0.136727	0.462264	0.0252976	1	0.762645		132
133	0.00827586	0.518591	0.782885	1	0.908655		133	0.119655	0.459854	0.0667884	1	0.769295		133	0.315068	0.617647	0.0366978	1	0.7408		6	0.00118671	0.0512821	0.907916	2	0.790421		133	0.00591569	0.5	0.507076	1	0.893164		133	0.0142586	0.321063	0.0976521	1	0.889971		133	0.136727	0.471698	0.0252969	1	0.762645		133
134	0.00844828	0.518591	0.782693	1	0.908655		134	0.119655	0.467153	0.0667236	1	0.769295		134	0.315068	0.627451	0.0366922	1	0.7408		7	0.00118671	0.0598291	0.901885	2	0.790421		134	0.00591569	0.501908	0.507075	1	0.893164		134	0.0144235	0.321063	0.0966291	1	0.889971		134	0.140636	0.471698	0.024682	1	0.762645		134
135	0.00844828	0.522505	0.775969	1	0.908655		135	0.125517	0.467153	0.0626479	1	0.769295		135	0.317848	0.627451	0.0364458	1	0.7408		8	0.00158228	0.0598291	0.86573	2	0.790421		135	0.00599843	0.501908	0.506428	1	0.893164		135	0.0148356	0.321063	0.0936129	1	0.889971		135	0.140636	0.481132	0.0246741	1	0.762645		135
136	0.0087931	0.522505	0.771337	1	0.908655		136	0.166034	0.518248	0.0625	1	0.769295		136	0.317848	0.637255	0.0364425	1	0.7408		9	0.00158228	0.0940171	0.768629	2	0.790421		136	0.00599843	0.507634	0.504747	1	0.893164		136	0.0150004	0.321063	0.0927891	1	0.889971		136	0.14191	0.481132	0.0245434	1	0.762645		136
137	0.0087931	0.524462	0.767518	1	0.908655		137	0.171552	0.518248	0.0619223	1	0.769295		137	0.323605	0.637255	0.0355881	1	0.7408		10	0.00276899	0.0940171	0.680289	2	0.790421		137	0.0060398	0.507634	0.50348	1	0.893164		137	0.0153301	0.321063	0.0900918	1	0.889971		137	0.14191	0.490566	0.0245371	1	0.762645		137
138	0.00913793	0.524462	0.763454	1	0.908655		138	0.171552	0.525547	0.0619218	1	0.769295		138	0.323605	0.647059	0.0355522	1	0.7408		11	0.00276899	0.102564	0.627463	2	0.790421		138	0.0060398	0.51145	0.503061	1	0.893164		138	0.0154949	0.321063	0.0896249	1	0.889971		138	0.14412	0.490566	0.0243552	1	0.762645		138
139	0.00931034	0.524462	0.75239	1	0.908655		139	0.172241	0.525547	0.0618567	1	0.769295		139	0.339091	0.647059	0.0333305	1	0.7408		12	0.00316456	0.102564	0.601723	2	0.790421		139	0.00608116	0.51145	0.502702	1	0.893164		139	0.0154949	0.323108	0.0894304	1	0.889971		139	0.14429	0.490566	0.0243393	1	0.762645		139
140	0.00931034	0.528376	0.749348	1	0.908655		140	0.172241	0.532847	0.0618402	1	0.769295		140	0.339091	0.656863	0.0333197	1	0.7408		13	0.00316456	0.111111	0.590497	2	0.790421		140	0.00608116	0.513359	0.50223	1	0.893164		140	0.0163191	0.323108	0.0849069	1	0.889971		140	0.145989	0.490566	0.0240992	1	0.762645		140
141	0.01	0.528376	0.725801	1	0.908655		141	0.173276	0.532847	0.0617315	1	0.769295		141	0.339488	0.656863	0.0333124	1	0.7408		14	0.00356013	0.111111	0.582049	2	0.790421		141	0.0061639	0.513359	0.502052	1	0.893164		141	0.0163191	0.325153	0.0848241	1	0.889971		141	0.146159	0.490566	0.0240983	1	0.762645		141
142	0.01	0.53229	0.723317	1	0.908655		142	0.173276	0.540146	0.0617233	1	0.769295		142	0.339488	0.666667	0.0332995	1	0.7408		15	0.00356013	0.119658	0.55036	2	0.790421		142	0.0061639	0.515267	0.501829	1	0.893164		142	0.0165664	0.325153	0.0830024	1	0.889971		142	0.150238	0.490566	0.0236117	1	0.762645		142
143	0.0103448	0.53229	0.720944	1	0.908655		143	0.173793	0.540146	0.0616678	1	0.769295		143	0.349216	0.666667	0.0319755	1	0.7408		16	0.00712025	0.119658	0.390039	2	0.790421		143	0.00624664	0.515267	0.499712	1	0.893164		143	0.0165664	0.327198	0.0817578	1	0.889971		143	0.150238	0.5	0.0236042	1	0.762645		143
144	0.0103448	0.534247	0.717549	1	0.908655		144	0.173793	0.547445	0.0616631	1	0.769295		144	0.349216	0.676471	0.031974	1	0.7408		17	0.00712025	0.128205	0.388374	2	0.790421		144	0.00624664	0.519084	0.498995	1	0.893164		144	0.0168136	0.327198	0.0812719	1	0.889971		144	0.157206	0.5	0.0226833	1	0.762645		144
145	0.0110345	0.534247	0.710155	1	0.908655		145	0.176552	0.547445	0.0613973	1	0.769295		145	0.353186	0.676471	0.0313163	1	0.7408		18	0.00751582	0.128205	0.384876	2	0.790421		145	0.00632938	0.519084	0.498761	1	0.893164		145	0.0168136	0.329243	0.0799717	1	0.889971		145	0.157206	0.509434	0.0226701	1	0.762645		145
146	0.0110345	0.536204	0.698762	1	0.908655		146	0.176552	0.554745	0.0613922	1	0.769295		146	0.353186	0.686275	0.0312867	1	0.7408		19	0.00751582	0.145299	0.371593	2	0.790421		146	0.00632938	0.520992	0.498759	1	0.893164		146	0.0175554	0.329243	0.0753611	1	0.889971		146	0.160435	0.509434	0.0222536	1	0.762645		146
147	0.0112069	0.536204	0.692785	1	0.908655		147	0.179828	0.554745	0.0609589	1	0.769295		147	0.355172	0.686275	0.0310117	1	0.7408		20	0.0090981	0.145299	0.33705	2	0.790421		147	0.00637074	0.520992	0.498659	1	0.893164		147	0.0175554	0.331288	0.0747567	1	0.889971		147	0.160605	0.509434	0.0222536	1	0.762645		147
148	0.0112069	0.53816	0.69037	1	0.908655		148	0.179828	0.562044	0.060946	1	0.769295		148	0.355172	0.696078	0.0310083	1	0.7408		21	0.0090981	0.17094	0.319502	2	0.790421		148	0.00637074	0.524809	0.498159	1	0.893164		148	0.0178027	0.331288	0.073492	1	0.889971		148	0.162899	0.509434	0.0219667	1	0.762645		148
149	0.0113793	0.53816	0.690061	1	0.908655		149	0.181207	0.562044	0.0607538	1	0.769295		149	0.359142	0.696078	0.030241	1	0.7408		22	0.0126582	0.17094	0.28332	2	0.790421		149	0.00649485	0.524809	0.497705	1	0.893164		149	0.0179675	0.331288	0.0734916	1	0.889971		149	0.163069	0.509434	0.0219516	1	0.762645		149
150	0.0117241	0.53816	0.689383	1	0.908655		150	0.181207	0.569343	0.0607206	1	0.769295		150	0.359142	0.705882	0.0302354	1	0.7408		23	0.0126582	0.179487	0.281404	2	0.790421		150	0.00649485	0.526718	0.497558	1	0.893164		150	0.0182972	0.331288	0.0721698	1	0.889971		150	0.164344	0.509434	0.0218223	1	0.762645		150
151	0.0118966	0.53816	0.689256	1	0.908655		151	0.186897	0.569343	0.0601838	1	0.769295		151	0.360334	0.705882	0.0300152	1	0.7408		24	0.0146361	0.179487	0.273742	2	0.790421		151	0.00686717	0.526718	0.496119	1	0.893164		151	0.0182972	0.333333	0.0718652	1	0.889971		151	0.164344	0.518868	0.0218151	1	0.762645		151
152	0.0118966	0.540117	0.688504	1	0.908655		152	0.186897	0.576642	0.0600969	1	0.769295		152	0.360334	0.715686	0.0299978	1	0.7408		25	0.0146361	0.188034	0.271062	2	0.790421		152	0.00686717	0.528626	0.4958	1	0.893164		152	0.0182972	0.337423	0.0717242	1	0.889971		152	0.166638	0.518868	0.0215525	1	0.762645		152
153	0.0118966	0.544031	0.687871	1	0.908655		153	0.188621	0.576642	0.0598807	1	0.769295		153	0.361922	0.715686	0.0296696	1	0.7408		26	0.0158228	0.188034	0.267574	2	0.790421		153	0.00707401	0.528626	0.494603	1	0.893164		153	0.0182972	0.339468	0.0715723	1	0.889971		153	0.166638	0.528302	0.0215482	1	0.762645		153
154	0.012069	0.544031	0.679717	1	0.908655		154	0.188621	0.583942	0.0598572	1	0.769295		154	0.362319	0.715686	0.0296531	1	0.7408		27	0.0158228	0.196581	0.266825	2	0.790421		154	0.00707401	0.530534	0.494561	1	0.893164		154	0.0189566	0.339468	0.065957	1	0.889971		154	0.169782	0.528302	0.0211412	1	0.762645		154
155	0.012069	0.547945	0.667848	1	0.908655		155	0.197931	0.583942	0.0584455	1	0.769295		155	0.368076	0.715686	0.02896	1	0.7408		28	0.0166139	0.196581	0.264315	2	0.790421		155	0.00728085	0.530534	0.493615	1	0.893164		155	0.0189566	0.341513	0.0658669	1	0.889971		155	0.169782	0.537736	0.021135	1	0.762645		155
156	0.0131034	0.547945	0.640413	1	0.908655		156	0.197931	0.591241	0.0584052	1	0.769295		156	0.368473	0.715686	0.0289471	1	0.7408		29	0.0166139	0.222222	0.255317	2	0.790421		156	0.00728085	0.532443	0.493316	1	0.893164		156	0.0197808	0.341513	0.0645905	1	0.889971		156	0.172502	0.537736	0.0208641	1	0.762645		156
157	0.0131034	0.551859	0.639698	1	0.908655		157	0.202241	0.591241	0.0577634	1	0.769295		157	0.373437	0.715686	0.028382	1	0.7408		30	0.0181962	0.222222	0.241686	2	0.790421		157	0.00740496	0.532443	0.492281	1	0.893164		157	0.0197808	0.345603	0.0643866	1	0.889971		157	0.172502	0.54717	0.0208637	1	0.762645		157
158	0.0131034	0.553816	0.638873	1	0.908655		158	0.202241	0.59854	0.0577612	1	0.769295		158	0.373437	0.72549	0.0283811	1	0.7408		31	0.0181962	0.230769	0.241258	2	0.790421		158	0.00740496	0.534351	0.492135	1	0.893164		158	0.0203577	0.345603	0.0632099	1	0.889971		158	0.17913	0.54717	0.0201107	1	0.762645		158
159	0.0132759	0.553816	0.631688	1	0.908655		159	0.214655	0.59854	0.055819	1	0.769295		159	0.384951	0.72549	0.0272934	1	0.7408		32	0.0189873	0.230769	0.240334	2	0.790421		159	0.00752906	0.534351	0.491371	1	0.893164		159	0.0203577	0.347648	0.0628684	1	0.889971		159	0.17913	0.556604	0.0200953	1	0.762645		159
160	0.0132759	0.561644	0.621034	1	0.908655		160	0.215	0.59854	0.0558186	1	0.769295		160	0.384951	0.735294	0.0272673	1	0.7408		33	0.0189873	0.239316	0.233169	2	0.790421		160	0.00752906	0.53626	0.491175	1	0.893164		160	0.0235721	0.574642	0.0625	1	0.889971		160	0.184823	0.556604	0.0195824	1	0.762645		160
161	0.0134483	0.561644	0.618161	1	0.908655		161	0.218103	0.59854	0.0552748	1	0.769295		161	0.403415	0.735294	0.0254857	1	0.7408		34	0.0213608	0.239316	0.220848	2	0.790421		161	0.00757043	0.53626	0.490315	1	0.893164		161	0.0235721	0.578732	0.0623444	1	0.889971		161	0.184823	0.566038	0.0195777	1	0.762645		161
162	0.0134483	0.565558	0.614707	1	0.908655		162	0.218448	0.59854	0.0552416	1	0.769295		162	0.403415	0.745098	0.0254813	1	0.7408		35	0.0221519	0.239316	0.219936	2	0.790421		162	0.00757043	0.538168	0.490016	1	0.893164		162	0.0236545	0.578732	0.0622968	1	0.889971		162	0.185673	0.566038	0.0195043	1	0.762645		162
163	0.0134483	0.569472	0.613445	1	0.908655		163	0.225517	0.59854	0.0539527	1	0.769295		163	0.404407	0.745098	0.02537	1	0.7408		36	0.0241297	0.239316	0.214946	2	0.790421		163	0.00806685	0.538168	0.486228	1	0.893164		163	0.0236545	0.580777	0.062234	1	0.889971		163	0.185673	0.575472	0.0194898	1	0.762645		163
164	0.0136207	0.569472	0.612213	1	0.908655		164	0.225517	0.605839	0.0539407	1	0.769295		164	0.404407	0.764706	0.0253491	1	0.7408		37	0.0241297	0.247863	0.214267	2	0.790421		164	0.00806685	0.540076	0.485812	1	0.893164		164	0.0237369	0.580777	0.0621922	1	0.889971		164	0.188477	0.575472	0.019029	1	0.762645		164
165	0.0136207	0.573386	0.610831	1	0.908655		165	0.226034	0.605839	0.0538555	1	0.769295		165	0.4324	0.764706	0.0227192	1	0.7408		38	0.0265032	0.247863	0.20705	2	0.790421		165	0.00827369	0.540076	0.484168	1	0.893164		165	0.0237369	0.582822	0.0621757	1	0.889971		165	0.188477	0.584906	0.0190184	1	0.762645		165
166	0.0137931	0.573386	0.608373	1	0.908655		166	0.226379	0.605839	0.0538499	1	0.769295		166	0.4324	0.77451	0.0227147	1	0.7408		39	0.0265032	0.25641	0.207042	2	0.790421		166	0.00827369	0.541985	0.483729	1	0.893164		166	0.0238193	0.582822	0.0620734	1	0.889971		166	0.189497	0.584906	0.0188943	1	0.762645		166
167	0.0137931	0.575342	0.60108	1	0.908655		167	0.226724	0.605839	0.0537951	1	0.769295		167	0.434981	0.77451	0.0223887	1	0.7408		40	0.028481	0.25641	0.195686	2	0.790421		167	0.00835643	0.541985	0.483555	1	0.893164		167	0.0238193	0.584867	0.0618625	1	0.889971		167	0.189667	0.584906	0.0188773	1	0.762645		167
168	0.0146552	0.575342	0.584168	1	0.908655		168	0.226724	0.613139	0.0537948	1	0.769295		168	0.434981	0.784314	0.0223706	1	0.7408		41	0.028481	0.264957	0.195135	2	0.790421		168	0.00835643	0.543893	0.482441	1	0.893164		168	0.0248084	0.584867	0.0612925	1	0.889971		168	0.190262	0.584906	0.0188243	1	0.762645		168
169	0.0146552	0.577299	0.578608	1	0.908655		169	0.231207	0.613139	0.0531583	1	0.769295		169	0.440341	0.784314	0.021749	1	0.7408		42	0.0300633	0.264957	0.192908	2	0.790421		169	0.00843917	0.543893	0.481604	1	0.893164		169	0.0248084	0.588957	0.0612722	1	0.889971		169	0.190432	0.584906	0.018818	1	0.762645		169
170	0.0151724	0.577299	0.575545	1	0.908655		170	0.231207	0.620438	0.0531476	1	0.769295		170	0.440739	0.784314	0.0217191	1	0.7408		43	0.0300633	0.282051	0.188139	2	0.790421		170	0.00843917	0.545802	0.481408	1	0.893164		170	0.0248084	0.591002	0.0611655	1	0.889971		170	0.192981	0.584906	0.0185165	1	0.762645		170
171	0.0151724	0.579256	0.571438	1	0.908655		171	0.231724	0.620438	0.0531209	1	0.769295		171	0.453047	0.784314	0.0205542	1	0.7408		44	0.0320411	0.282051	0.182865	2	0.790421		171	0.00848054	0.545802	0.480658	1	0.893164		171	0.0248908	0.591002	0.061153	1	0.889971		171	0.192981	0.59434	0.0185009	1	0.762645		171
172	0.0153448	0.579256	0.569405	1	0.908655		172	0.232069	0.620438	0.0530741	1	0.769295		172	0.453047	0.794118	0.0205274	1	0.7408		45	0.0320411	0.290598	0.181742	2	0.790421		172	0.00848054	0.54771	0.48058	1	0.893164		172	0.0248908	0.595092	0.0610761	1	0.889971		172	0.19536	0.59434	0.0182249	1	0.762645		172
173	0.0153448	0.581213	0.569391	1	0.908655		173	0.234828	0.620438	0.0524502	1	0.769295		173	0.475481	0.794118	0.018608	1	0.7408		46	0.0399525	0.290598	0.158786	2	0.790421		173	0.00856327	0.54771	0.479535	1	0.893164		173	0.0256326	0.595092	0.0602528	1	0.889971		173	0.19536	0.603774	0.0182148	1	0.762645		173
174	0.0158621	0.581213	0.56003	1	0.908655		174	0.234828	0.627737	0.0524408	1	0.769295		174	0.475878	0.794118	0.0186075	1	0.7408		47	0.0399525	0.299145	0.158218	2	0.790421		174	0.00856327	0.549618	0.479217	1	0.893164		174	0.0256326	0.597137	0.0601568	1	0.889971		174	0.210486	0.603774	0.0167966	1	0.762645		174
175	0.0158621	0.58317	0.558269	1	0.908655		175	0.24	0.627737	0.0516266	1	0.769295		175	0.479651	0.794118	0.0182597	1	0.7408		48	0.0466772	0.299145	0.151774	2	0.790421		175	0.00864601	0.549618	0.478701	1	0.893164		175	0.025715	0.597137	0.0601153	1	0.889971		175	0.210486	0.613208	0.0167914	1	0.762645		175
176	0.0160345	0.58317	0.556302	1	0.908655		176	0.24	0.635036	0.0516177	1	0.769295		176	0.479651	0.803922	0.0182547	1	0.7408		49	0.0466772	0.307692	0.151769	2	0.790421		176	0.00864601	0.551527	0.478541	1	0.893164		176	0.025715	0.601227	0.0599742	1	0.889971		176	0.223827	0.613208	0.0156636	1	0.762645		176
177	0.0160345	0.585127	0.552984	1	0.908655		177	0.24069	0.635036	0.0515392	1	0.769295		177	0.511018	0.803922	0.0158613	1	0.7408		50	0.0549842	0.307692	0.143374	2	0.790421		177	0.00889422	0.551527	0.475864	1	0.893164		177	0.0271985	0.601227	0.0589667	1	0.889971		177	0.223827	0.622642	0.0156585	1	0.762645		177
178	0.0162069	0.585127	0.552143	1	0.908655		178	0.24069	0.642336	0.0515296	1	0.769295		178	0.511018	0.813725	0.0158314	1	0.7408		51	0.0549842	0.316239	0.143273	2	0.790421		178	0.00889422	0.553435	0.475518	1	0.893164		178	0.0271985	0.605317	0.0586899	1	0.889971		178	0.224677	0.622642	0.01556	1	0.762645		178
179	0.0162069	0.587084	0.551597	1	0.908655		179	0.244828	0.642336	0.0508656	1	0.769295		179	0.521342	0.813725	0.0150217	1	0.7408		52	0.0621044	0.316239	0.136939	2	0.790421		179	0.00901833	0.553435	0.474704	1	0.893164		179	0.027281	0.605317	0.0586632	1	0.889971		179	0.224847	0.622642	0.0155536	1	0.762645		179
180	0.0163793	0.587084	0.549837	1	0.908655		180	0.244828	0.649635	0.0508321	1	0.769295		180	0.521342	0.823529	0.0150084	1	0.7408		53	0.0621044	0.324786	0.13679	2	0.790421		180	0.00901833	0.555344	0.474655	1	0.893164		180	0.027281	0.607362	0.0586423	1	0.889971		180	0.230795	0.622642	0.0150506	1	0.762645		180
181	0.0163793	0.589041	0.545524	1	0.908655		181	0.247931	0.649635	0.0502189	1	0.769295		181	0.531666	0.823529	0.0144258	1	0.7408		54	0.0664557	0.324786	0.131167	2	0.790421		181	0.00968022	0.555344	0.47145	1	0.893164		181	0.0273634	0.607362	0.058622	1	0.889971		181	0.230965	0.622642	0.0150347	1	0.762645		181
182	0.017069	0.589041	0.539897	1	0.908655		182	0.247931	0.656934	0.0502165	1	0.769295		182	0.531666	0.833333	0.014419	1	0.7408		55	0.0664557	0.333333	0.131128	2	0.790421		182	0.00968022	0.557252	0.470867	1	0.893164		182	0.0273634	0.609407	0.0585208	1	0.889971		182	0.236999	0.622642	0.0145296	1	0.762645		182
183	0.017069	0.592955	0.533109	1	0.908655		183	0.25069	0.656934	0.0495581	1	0.769295		183	0.549732	0.833333	0.0131075	1	0.7408		56	0.0672468	0.333333	0.130938	2	0.790421		183	0.00976296	0.557252	0.470614	1	0.893164		183	0.0274458	0.609407	0.0584503	1	0.889971		183	0.236999	0.632075	0.0145123	1	0.762645		183
184	0.0174138	0.592955	0.518243	1	0.908655		184	0.251034	0.656934	0.0495385	1	0.769295		184	0.550129	0.833333	0.0130867	1	0.7408		57	0.0672468	0.34188	0.130913	2	0.790421		184	0.00976296	0.55916	0.470382	1	0.893164		184	0.0274458	0.611452	0.0583338	1	0.889971		184	0.239123	0.632075	0.0143974	1	0.762645		184
185	0.0174138	0.594912	0.516887	1	0.908655		185	0.251379	0.656934	0.0494894	1	0.769295		185	0.553107	0.833333	0.0128891	1	0.7408		58	0.068038	0.34188	0.130251	2	0.790421		185	0.0100112	0.55916	0.469188	1	0.893164		185	0.0276931	0.611452	0.0581506	1	0.889971		185	0.239123	0.641509	0.0143834	1	0.762645		185
186	0.0184483	0.594912	0.496496	1	0.908655		186	0.251379	0.664234	0.04945	1	0.769295		186	0.553107	0.843137	0.0128818	1	0.7408		59	0.068038	0.358974	0.129297	2	0.790421		186	0.0100112	0.561069	0.469078	1	0.893164		186	0.0276931	0.615542	0.0581177	1	0.889971		186	0.239463	0.641509	0.0143682	1	0.762645		186
187	0.0184483	0.596869	0.493096	1	0.908655		187	0.276034	0.664234	0.0453797	1	0.769295		187	0.553306	0.843137	0.0128797	1	0.7408		60	0.0719937	0.358974	0.127068	2	0.790421		187	0.010218	0.561069	0.467963	1	0.893164		187	0.0286821	0.615542	0.0568649	1	0.889971		187	0.239463	0.650943	0.0143384	1	0.762645		187
188	0.0196552	0.596869	0.471074	1	0.908655		188	0.276379	0.664234	0.0453772	1	0.769295		188	0.553306	0.852941	0.0128776	1	0.7408		61	0.0719937	0.367521	0.12652	2	0.790421		188	0.010218	0.562977	0.467879	1	0.893164		188	0.0286821	0.619632	0.0568227	1	0.889971		188	0.246516	0.650943	0.0137763	1	0.762645		188
189	0.0196552	0.598826	0.457027	1	0.908655		189	0.277414	0.664234	0.045181	1	0.769295		189	0.562438	0.852941	0.0123531	1	0.7408		62	0.0735759	0.367521	0.125774	2	0.790421		189	0.0107144	0.562977	0.465871	1	0.893164		189	0.0294239	0.619632	0.056327	1	0.889971		189	0.246516	0.660377	0.0137671	1	0.762645		189
190	0.0198276	0.598826	0.456242	1	0.908655		190	0.277414	0.671533	0.0451731	1	0.769295		190	0.562438	0.862745	0.0123285	1	0.7408		63	0.0743671	0.367521	0.125743	2	0.790421		190	0.0107144	0.564885	0.465535	1	0.893164		190	0.0294239	0.621677	0.0562432	1	0.889971		190	0.25068	0.660377	0.013461	1	0.762645		190
191	0.0198276	0.600783	0.455757	1	0.908655		191	0.285172	0.671533	0.0437664	1	0.769295		191	0.578122	0.862745	0.0116022	1	0.7408		64	0.0743671	0.376068	0.125544	2	0.790421		191	0.0108799	0.564885	0.464808	1	0.893164		191	0.0297536	0.621677	0.0560792	1	0.889971		191	0.25068	0.669811	0.0134496	1	0.762645		191
192	0.0205172	0.600783	0.439957	1	0.908655		192	0.285172	0.678832	0.0436867	1	0.769295		192	0.578122	0.872549	0.0115759	1	0.7408		65	0.0755538	0.376068	0.12516	2	0.790421		192	0.0108799	0.566794	0.464224	1	0.893164		192	0.0299184	0.621677	0.0560772	1	0.889971		192	0.253994	0.669811	0.013281	1	0.762645		192
193	0.0205172	0.60274	0.439756	1	0.908655		193	0.292241	0.678832	0.0427649	1	0.769295		193	0.604725	0.872549	0.0102906	1	0.7408		66	0.143196	0.504274	0.125	2	0.790421		193	0.011004	0.566794	0.463293	1	0.893164		193	0.031402	0.621677	0.0552475	1	0.889971		193	0.254164	0.669811	0.0132762	1	0.762645		193
194	0.0206897	0.60274	0.439667	1	0.908655		194	0.292586	0.678832	0.0427591	1	0.769295		194	0.604725	0.882353	0.0102893	1	0.7408		67	0.143987	0.504274	0.124957	2	0.790421		194	0.011004	0.568702	0.463244	1	0.893164		194	0.031402	0.623722	0.0552422	1	0.889971		194	0.263171	0.669811	0.0126988	1	0.762645		194
195	0.0206897	0.606654	0.437358	1	0.908655		195	0.300862	0.678832	0.0416602	1	0.769295		195	0.613857	0.882353	0.00985843	1	0.7408		68	0.143987	0.512821	0.124847	2	0.790421		195	0.0111281	0.568702	0.462008	1	0.893164		195	0.0323086	0.623722	0.05469	1	0.889971		195	0.263341	0.669811	0.0126934	1	0.762645		195
196	0.0210345	0.606654	0.435539	1	0.908655		196	0.301207	0.678832	0.0416551	1	0.769295		196	0.613857	0.892157	0.00985343	1	0.7408		69	0.150712	0.512821	0.123997	2	0.790421		196	0.0111281	0.570611	0.461307	1	0.893164		196	0.0323086	0.625767	0.0546531	1	0.889971		196	0.265976	0.669811	0.012519	1	0.762645		196
197	0.0210345	0.610568	0.430021	1	0.908655		197	0.312759	0.678832	0.0402334	1	0.769295		197	0.625372	0.892157	0.00943771	1	0.7408		70	0.150712	0.521368	0.123844	2	0.790421		197	0.0112109	0.570611	0.46102	1	0.893164		197	0.0323086	0.629857	0.0546491	1	0.889971		197	0.265976	0.679245	0.0125052	1	0.762645		197
198	0.0212069	0.610568	0.429056	1	0.908655		198	0.312759	0.686131	0.0401955	1	0.769295		198	0.625372	0.901961	0.00942747	1	0.7408		71	0.151503	0.521368	0.123754	2	0.790421		198	0.0112109	0.572519	0.460631	1	0.893164		198	0.0328855	0.629857	0.0544617	1	0.889971		198	0.270819	0.679245	0.0122216	1	0.762645		198
199	0.0212069	0.612524	0.424153	1	0.908655		199	0.322414	0.686131	0.0390399	1	0.769295		199	0.666071	0.901961	0.00755924	1	0.7408		72	0.151503	0.529915	0.12368	2	0.790421		199	0.0112936	0.572519	0.460092	1	0.893164		199	0.0328855	0.631902	0.0544157	1	0.889971		199	0.270989	0.679245	0.01222	1	0.762645		199
200	0.0212069	0.616438	0.424101	1	0.908655		200	0.322414	0.693431	0.0390039	1	0.769295		200	0.666071	0.911765	0.0075539	1	0.7408		73	0.151899	0.529915	0.123637	2	0.790421		200	0.0112936	0.574427	0.459983	1	0.893164		200	0.0329679	0.631902	0.0544084	1	0.889971		200	0.274643	0.679245	0.0119758	1	0.762645		200
201	0.0222414	0.616438	0.416299	1	0.908655		201	0.326034	0.693431	0.0383874	1	0.769295		201	0.68652	0.911765	0.00683492	1	0.7408		74	0.151899	0.538462	0.123551	2	0.790421		201	0.0114591	0.574427	0.459349	1	0.893164		201	0.0329679	0.633947	0.0543311	1	0.889971		201	0.274813	0.679245	0.0119616	1	0.762645		201
202	0.0222414	0.620352	0.414561	1	0.908655		202	0.326379	0.693431	0.0383808	1	0.769295		202	0.68652	0.921569	0.00682585	1	0.7408		75	0.152294	0.538462	0.123511	2	0.790421		202	0.0114591	0.576336	0.459264	1	0.893164		202	0.0334625	0.633947	0.0541235	1	0.889971		202	0.281526	0.679245	0.0115375	1	0.762645		202
203	0.0222414	0.622309	0.414377	1	0.908655		203	0.335517	0.693431	0.0371889	1	0.769295		203	0.688505	0.921569	0.00669865	1	0.7408		76	0.152294	0.547009	0.123447	2	0.790421		203	0.0115832	0.576336	0.458821	1	0.893164		203	0.0334625	0.635992	0.0540688	1	0.889971		203	0.281526	0.688679	0.0115349	1	0.762645		203
204	0.0231034	0.622309	0.398419	1	0.908655		204	0.335517	0.70073	0.0371825	1	0.769295		204	0.688902	0.921569	0.00669119	1	0.7408		77	0.157041	0.547009	0.122905	2	0.790421		204	0.0115832	0.578244	0.458776	1	0.893164		204	0.0336273	0.635992	0.0540378	1	0.889971		204	0.283736	0.688679	0.0113532	1	0.762645		204
205	0.0231034	0.624266	0.39716	1	0.908655		205	0.339138	0.70073	0.0366978	1	0.769295		205	0.696049	0.921569	0.00645675	1	0.7408		78	0.157041	0.555556	0.122875	2	0.790421		205	0.0116245	0.578244	0.458596	1	0.893164		205	0.0337921	0.635992	0.054024	1	0.889971		205	0.283906	0.688679	0.0113457	1	0.762645		205
206	0.0234483	0.624266	0.394294	1	0.908655		206	0.339138	0.708029	0.0366922	1	0.769295		206	0.696446	0.921569	0.00645159	1	0.7408		79	0.158228	0.555556	0.122706	2	0.790421		206	0.0116245	0.582061	0.458113	1	0.893164		206	0.033957	0.635992	0.0539874	1	0.889971		206	0.291978	0.688679	0.0109517	1	0.762645		206
207	0.0234483	0.626223	0.391226	1	0.908655		207	0.341897	0.708029	0.0364458	1	0.769295		207	0.722652	0.921569	0.00561668	1	0.7408		80	0.158228	0.564103	0.122562	2	0.790421		207	0.0116659	0.582061	0.458057	1	0.893164		207	0.033957	0.638037	0.0539444	1	0.889971		207	0.292148	0.688679	0.0109448	1	0.762645		207
208	0.0237931	0.626223	0.381236	1	0.908655		208	0.341897	0.715328	0.0364425	1	0.769295		208	0.722652	0.931373	0.00561257	1	0.7408		81	0.162184	0.564103	0.121918	2	0.790421		208	0.0116659	0.583969	0.457995	1	0.893164		208	0.0341218	0.638037	0.0539299	1	0.889971		208	0.294018	0.688679	0.0108284	1	0.762645		208
209	0.0241379	0.626223	0.380105	1	0.908655		209	0.347931	0.715328	0.0355842	1	0.769295		209	0.736152	0.931373	0.00527624	1	0.7408		82	0.162184	0.57265	0.121892	2	0.790421		209	0.0118314	0.583969	0.457432	1	0.893164		209	0.0341218	0.640082	0.0538915	1	0.889971		209	0.294188	0.688679	0.0108241	1	0.762645		209
210	0.0248276	0.626223	0.376844	1	0.908655		210	0.347931	0.722628	0.0355522	1	0.769295		210	0.736748	0.931373	0.00527427	1	0.7408		83	0.164161	0.57265	0.121508	2	0.790421		210	0.0118314	0.585878	0.45738	1	0.893164		210	0.0350284	0.640082	0.0532144	1	0.889971		210	0.299626	0.688679	0.0106046	1	0.762645		210
211	0.0248276	0.62818	0.375365	1	0.908655		211	0.363621	0.722628	0.0333305	1	0.769295		211	0.744888	0.931373	0.00503948	1	0.7408		84	0.164161	0.581197	0.121441	2	0.790421		211	0.0122864	0.585878	0.454827	1	0.893164		211	0.0350284	0.642127	0.0532034	1	0.889971		211	0.299796	0.688679	0.0106038	1	0.762645		211
212	0.0255172	0.62818	0.367938	1	0.908655		212	0.363621	0.729927	0.0333197	1	0.769295		212	0.744888	0.941176	0.00503167	1	0.7408		85	0.165744	0.581197	0.121271	2	0.790421		212	0.0122864	0.587786	0.454693	1	0.893164		212	0.0362647	0.642127	0.0522397	1	0.889971		212	0.3043	0.688679	0.010399	1	0.762645		212
213	0.0255172	0.632094	0.367317	1	0.908655		213	0.363966	0.729927	0.0333124	1	0.769295		213	0.755013	0.941176	0.00467678	1	0.7408		86	0.165744	0.589744	0.121173	2	0.790421		213	0.0127829	0.587786	0.452272	1	0.893164		213	0.0362647	0.644172	0.0521993	1	0.889971		213	0.3043	0.698113	0.0103982	1	0.762645		213
214	0.0255172	0.636008	0.362945	1	0.908655		214	0.363966	0.737226	0.0332995	1	0.769295		214	0.755013	0.95098	0.00467322	1	0.7408		87	0.174051	0.589744	0.120368	2	0.790421		214	0.0127829	0.589695	0.451943	1	0.893164		214	0.0364296	0.644172	0.0521813	1	0.889971		214	0.304725	0.698113	0.0103732	1	0.762645		214
215	0.0258621	0.636008	0.362424	1	0.908655		215	0.374138	0.737226	0.0319755	1	0.769295		215	0.760572	0.95098	0.00457309	1	0.7408		88	0.174051	0.598291	0.120352	2	0.790421		215	0.0134861	0.589695	0.448676	1	0.893164		215	0.0364296	0.648262	0.0520489	1	0.889971		215	0.304895	0.698113	0.0103719	1	0.762645		215
216	0.0258621	0.639922	0.3578	1	0.908655		216	0.374138	0.744526	0.031974	1	0.769295		216	0.760572	0.960784	0.00456759	1	0.7408		89	0.185127	0.598291	0.1186	2	0.790421		216	0.0134861	0.591603	0.448502	1	0.893164		216	0.0365944	0.648262	0.0519172	1	0.889971		216	0.307529	0.698113	0.0102055	1	0.762645		216
217	0.0262069	0.639922	0.354739	1	0.908655		217	0.378448	0.744526	0.0313163	1	0.769295		217	0.771689	0.960784	0.00425921	1	0.7408		90	0.185127	0.615385	0.118459	2	0.790421		217	0.0136102	0.591603	0.448138	1	0.893164		217	0.0370889	0.648262	0.0514436	1	0.889971		217	0.307699	0.698113	0.0102022	1	0.762645		217
218	0.0263793	0.639922	0.353715	1	0.908655		218	0.378448	0.751825	0.0312867	1	0.769295		218	0.771689	0.970588	0.00424925	1	0.7408		91	0.196203	0.615385	0.11664	2	0.790421		218	0.0136102	0.593511	0.448065	1	0.893164		218	0.0372538	0.648262	0.0514158	1	0.889971		218	0.310163	0.698113	0.0101368	1	0.762645		218
219	0.0263793	0.641879	0.353362	1	0.908655		219	0.38	0.751825	0.0310888	1	0.769295		219	0.837602	0.970588	0.00262881	1	0.7408		92	0.196203	0.623932	0.116623	2	0.790421		219	0.0141894	0.593511	0.444132	1	0.893164		219	0.0375835	0.648262	0.0509077	1	0.889971		219	0.310163	0.707547	0.0101364	1	0.762645		219
220	0.0267241	0.641879	0.348826	1	0.908655		220	0.380345	0.751825	0.0310854	1	0.769295		220	0.837999	0.970588	0.00262205	1	0.7408		93	0.210839	0.623932	0.113139	2	0.790421		220	0.0141894	0.59542	0.444026	1	0.893164		220	0.0375835	0.650307	0.0508896	1	0.889971		220	0.311523	0.707547	0.0100441	1	0.762645		220
221	0.0267241	0.645793	0.341827	1	0.908655		221	0.380862	0.751825	0.0310117	1	0.769295		221	0.850308	0.970588	0.00238392	1	0.7408		94	0.210839	0.632479	0.112986	2	0.790421		221	0.0145617	0.59542	0.442405	1	0.893164		221	0.0382428	0.650307	0.0504579	1	0.889971		221	0.311523	0.716981	0.0100424	1	0.762645		221
222	0.027931	0.645793	0.333561	1	0.908655		222	0.380862	0.759124	0.0310083	1	0.769295		222	0.850308	0.980392	0.00238068	1	0.7408		95	0.231013	0.632479	0.108963	2	0.790421		222	0.0145617	0.597328	0.442311	1	0.893164		222	0.0382428	0.652352	0.0503855	1	0.889971		222	0.312203	0.716981	0.0100238	1	0.762645		222
223	0.027931	0.64775	0.333466	1	0.908655		223	0.385517	0.759124	0.030241	1	0.769295		223	0.877904	0.980392	0.001862	1	0.7408		96	0.231013	0.641026	0.108714	2	0.790421		223	0.0146858	0.597328	0.441627	1	0.893164		223	0.0389846	0.652352	0.0497536	1	0.889971		223	0.312373	0.716981	0.0100217	1	0.762645		223
224	0.0286207	0.64775	0.327507	1	0.908655		224	0.385517	0.766423	0.0302354	1	0.769295		224	0.877904	0.990196	0.00186141	1	0.7408		97	0.235364	0.641026	0.107905	2	0.790421		224	0.0146858	0.599237	0.441247	1	0.893164		224	0.0389846	0.656442	0.0497267	1	0.889971		224	0.313902	0.716981	0.00993959	1	0.762645		224
225	0.0286207	0.651663	0.321982	1	0.908655		225	0.389138	0.766423	0.0296599	1	0.769295		225	0.974985	0.990196	0.000313383	1	0.7408		98	0.235364	0.649573	0.107881	2	0.790421		225	0.015265	0.599237	0.439003	1	0.893164		225	0.0398912	0.656442	0.049373	1	0.889971		225	0.313902	0.726415	0.0099383	1	0.762645		225
226	0.0291379	0.651663	0.316933	1	0.908655		226	0.389483	0.766423	0.0296531	1	0.769295		226	0.974985	1	0.000312649	1	0.7408		99	0.235759	0.649573	0.107801	2	0.790421		226	0.015265	0.601145	0.438652	1	0.893164		226	0.0398912	0.658487	0.0493651	1	0.889971		226	0.319765	0.726415	0.00967133	1	0.762645		226
227	0.0291379	0.65362	0.316511	1	0.908655		227	0.39569	0.766423	0.02896	1	0.769295		227	0.984316	1	0.000218759	1	0.7408		100	0.235759	0.666667	0.10759	2	0.790421		227	0.0153477	0.601145	0.437916	1	0.893164		227	0.0415396	0.658487	0.0485706	1	0.889971		227	0.319935	0.726415	0.00966759	1	0.762645		227
228	0.0298276	0.65362	0.310166	1	0.908655		228	0.396034	0.766423	0.0289471	1	0.769295		228	0.984713	1	0.000217941	1	0.7408		101	0.238924	0.666667	0.10689	2	0.790421		228	0.0153477	0.603053	0.437767	1	0.893164		228	0.0415396	0.660532	0.0485438	1	0.889971		228	0.326734	0.726415	0.0094119	1	0.762645		228
229	0.0298276	0.655577	0.30679	1	0.908655		229	0.401034	0.766423	0.028382	1	0.769295		229	1	1	2.48088e-05	1	0.7408		102	0.238924	0.675214	0.106881	2	0.790421		229	0.0163819	0.603053	0.430797	1	0.893164		229	0.0417044	0.660532	0.0485343	1	0.889971		229	0.326903	0.726415	0.00941096	1	0.762645		229
230	0.0310345	0.655577	0.29461	1	0.908655		230	0.401034	0.773723	0.0283811	1	0.769295		0	0	0	1.99938	2	0.7258		103	0.242089	0.675214	0.106458	2	0.790421		230	0.0163819	0.604962	0.430032	1	0.893164		230	0.0419517	0.660532	0.0484222	1	0.889971		230	0.335231	0.726415	0.0090338	1	0.762645		230
231	0.0310345	0.659491	0.294112	1	0.908655		231	0.411897	0.773723	0.0272934	1	0.769295		1	0	0.0111111	0.999378	2	0.7258		104	0.242089	0.683761	0.106453	2	0.790421		231	0.0165888	0.604962	0.428677	1	0.893164		231	0.0419517	0.662577	0.0483949	1	0.889971		231	0.335401	0.726415	0.0090267	1	0.762645		231
232	0.0317241	0.659491	0.28982	1	0.908655		232	0.411897	0.781022	0.0272673	1	0.769295		2	0	0.0166667	0.998707	2	0.7258		105	0.243275	0.683761	0.106317	2	0.790421		232	0.0165888	0.60687	0.428488	1	0.893164		232	0.042199	0.662577	0.0481886	1	0.889971		232	0.3388	0.726415	0.00885563	1	0.762645		232
233	0.0317241	0.663405	0.287694	1	0.908655		233	0.430517	0.781022	0.0254857	1	0.769295		3	0.000403388	0.0166667	0.995589	2	0.7258		106	0.243275	0.692308	0.106295	2	0.790421		233	0.0172093	0.60687	0.425015	1	0.893164		233	0.042199	0.664622	0.0481874	1	0.889971		233	0.33897	0.726415	0.00884905	1	0.762645		233
234	0.032069	0.663405	0.286303	1	0.908655		234	0.430517	0.788321	0.0254813	1	0.769295		4	0.000403388	0.0388889	0.99138	2	0.7258		107	0.258307	0.692308	0.102409	2	0.790421		234	0.0172093	0.608779	0.424901	1	0.893164		234	0.0459903	0.664622	0.0464531	1	0.889971		234	0.34067	0.726415	0.00877637	1	0.762645		234
235	0.032069	0.667319	0.281113	1	0.908655		235	0.431724	0.788321	0.02537	1	0.769295		5	0.000806777	0.0388889	0.96996	2	0.7258		108	0.258307	0.700855	0.102271	2	0.790421		235	0.017292	0.608779	0.424886	1	0.893164		235	0.0459903	0.666667	0.0464475	1	0.889971		235	0.34084	0.726415	0.00877118	1	0.762645		235
236	0.0324138	0.667319	0.279553	1	0.908655		236	0.431724	0.80292	0.0253491	1	0.769295		6	0.000806777	0.0444444	0.969348	2	0.7258		109	0.260285	0.700855	0.102001	2	0.790421		236	0.017292	0.610687	0.424611	1	0.893164		236	0.0468145	0.666667	0.0459655	1	0.889971		236	0.341859	0.726415	0.0087342	1	0.762645		236
237	0.0324138	0.669276	0.278985	1	0.908655		237	0.432586	0.80292	0.0252606	1	0.769295		7	0.00100847	0.0444444	0.950882	2	0.7258		110	0.260285	0.709402	0.101921	2	0.790421		237	0.0174989	0.610687	0.424006	1	0.893164		237	0.0468145	0.668712	0.0458719	1	0.889971		237	0.342029	0.726415	0.00873136	1	0.762645		237
238	0.032931	0.669276	0.275415	1	0.908655		238	0.432586	0.810219	0.0252408	1	0.769295		8	0.00100847	0.0555556	0.947711	2	0.7258		111	0.261472	0.709402	0.101731	2	0.790421		238	0.0174989	0.612595	0.423485	1	0.893164		238	0.0468969	0.668712	0.0458481	1	0.889971		238	0.344494	0.726415	0.00863792	1	0.762645		238
239	0.032931	0.671233	0.275087	1	0.908655		239	0.458448	0.810219	0.0227192	1	0.769295		9	0.00181525	0.0555556	0.902563	2	0.7258		112	0.261472	0.717949	0.101664	2	0.790421		239	0.0182849	0.612595	0.420053	1	0.893164		239	0.0468969	0.670757	0.0457613	1	0.889971		239	0.344494	0.735849	0.00863724	1	0.762645		239
240	0.0362069	0.671233	0.251192	1	0.908655		240	0.458448	0.817518	0.0227147	1	0.769295		10	0.00181525	0.0611111	0.901885	2	0.7258		113	0.282437	0.717949	0.0943582	2	0.790421		240	0.0182849	0.614504	0.420019	1	0.893164		240	0.0475563	0.670757	0.0453513	1	0.889971		240	0.361149	0.735849	0.00790107	1	0.762645		240
241	0.0362069	0.675147	0.251078	1	0.908655		241	0.461207	0.817518	0.0223887	1	0.769295		11	0.00262203	0.0611111	0.8609	2	0.7258		114	0.282437	0.726496	0.0942584	2	0.790421		241	0.0191122	0.614504	0.417652	1	0.893164		241	0.0477211	0.670757	0.0452025	1	0.889971		241	0.361149	0.745283	0.00789941	1	0.762645		241
242	0.0362069	0.677104	0.25093	1	0.908655		242	0.461207	0.824818	0.0223706	1	0.769295		12	0.00262203	0.0722222	0.853789	2	0.7258		115	0.293513	0.726496	0.0919014	2	0.790421		242	0.0191122	0.616412	0.417605	1	0.893164		242	0.0492871	0.670757	0.0446749	1	0.889971		242	0.364718	0.745283	0.00777066	1	0.762645		242
243	0.0363793	0.677104	0.250727	1	0.908655		243	0.466379	0.824818	0.021749	1	0.769295		13	0.00282372	0.0722222	0.849742	2	0.7258		116	0.293513	0.735043	0.0918625	2	0.790421		243	0.0194018	0.616412	0.416845	1	0.893164		243	0.0492871	0.672802	0.0446662	1	0.889971		243	0.364888	0.745283	0.00776834	1	0.762645		243
244	0.0363793	0.679061	0.250377	1	0.908655		244	0.466724	0.824818	0.0217191	1	0.769295		14	0.00282372	0.0777778	0.848769	2	0.7258		117	0.294304	0.735043	0.0917245	2	0.790421		244	0.0194018	0.618321	0.416345	1	0.893164		244	0.0528311	0.672802	0.043262	1	0.889971		244	0.367862	0.745283	0.00768921	1	0.762645		244
245	0.0375862	0.679061	0.241858	1	0.908655		245	0.468448	0.824818	0.0215009	1	0.769295		15	0.00322711	0.0777778	0.840031	2	0.7258		118	0.294304	0.74359	0.091716	2	0.790421		245	0.0194432	0.618321	0.416264	1	0.893164		245	0.0528311	0.674847	0.0432379	1	0.889971		245	0.368032	0.745283	0.0076852	1	0.762645		245
246	0.037931	0.679061	0.24057	1	0.908655		246	0.468448	0.832117	0.0214979	1	0.769295		16	0.0036305	0.0777778	0.837567	2	0.7258		119	0.297864	0.74359	0.0903621	2	0.790421		246	0.0194432	0.620229	0.416179	1	0.893164		246	0.0545619	0.674847	0.0428194	1	0.889971		246	0.369307	0.745283	0.0076184	1	0.762645		246
247	0.0393103	0.679061	0.230529	1	0.908655		247	0.47931	0.832117	0.0205372	1	0.769295		17	0.00423558	0.0777778	0.799942	2	0.7258		120	0.297864	0.760684	0.0902772	2	0.790421		247	0.0196087	0.620229	0.415554	1	0.893164		247	0.0545619	0.676892	0.0428088	1	0.889971		247	0.369307	0.754717	0.00761598	1	0.762645		247
248	0.0393103	0.681018	0.230075	1	0.908655		248	0.47931	0.839416	0.0205274	1	0.769295		18	0.00423558	0.0833333	0.79736	2	0.7258		121	0.299842	0.760684	0.0899585	2	0.790421		248	0.0196087	0.622137	0.415522	1	0.893164		248	0.0566224	0.676892	0.0421651	1	0.889971		248	0.369646	0.754717	0.00759528	1	0.762645		248
249	0.0425862	0.681018	0.218463	1	0.908655		249	0.501552	0.839416	0.018608	1	0.769295		19	0.00443727	0.0833333	0.795296	2	0.7258		122	0.299842	0.769231	0.0898224	2	0.790421		249	0.0196914	0.622137	0.415144	1	0.893164		249	0.0566224	0.678937	0.0421564	1	0.889971		249	0.369646	0.764151	0.00759419	1	0.762645		249
250	0.0425862	0.682975	0.217963	1	0.908655		250	0.501897	0.839416	0.0186075	1	0.769295		20	0.00443727	0.0888889	0.790022	2	0.7258		123	0.337025	0.769231	0.0818547	2	0.790421		250	0.0196914	0.624046	0.414871	1	0.893164		250	0.0566224	0.683027	0.0420831	1	0.889971		250	0.380523	0.764151	0.00724957	1	0.762645		250
251	0.042931	0.682975	0.215317	1	0.908655		251	0.506034	0.839416	0.0182597	1	0.769295		21	0.00463897	0.0888889	0.782062	2	0.7258		124	0.337816	0.769231	0.0817807	2	0.790421		251	0.0202292	0.624046	0.413421	1	0.893164		251	0.0577763	0.683027	0.0418494	1	0.889971		251	0.380523	0.773585	0.00724902	1	0.762645		251
252	0.0432759	0.682975	0.214532	1	0.908655		252	0.506034	0.846715	0.0182547	1	0.769295		22	0.00504236	0.0888889	0.778881	2	0.7258		125	0.358386	0.769231	0.0784797	2	0.790421		252	0.0202292	0.627863	0.412886	1	0.893164		252	0.0579412	0.683027	0.0418371	1	0.889971		252	0.380778	0.773585	0.00722862	1	0.762645		252
253	0.0444828	0.682975	0.211381	1	0.908655		253	0.536724	0.846715	0.0158613	1	0.769295		23	0.00645422	0.0888889	0.703536	2	0.7258		126	0.358386	0.777778	0.0783344	2	0.790421		253	0.0205188	0.627863	0.411538	1	0.893164		253	0.0602489	0.683027	0.0409525	1	0.889971		253	0.380778	0.783019	0.00722665	1	0.762645		253
254	0.0444828	0.684932	0.21046	1	0.908655		254	0.536724	0.854015	0.0158314	1	0.769295		24	0.0068576	0.0888889	0.695352	2	0.7258		127	0.36432	0.777778	0.0767749	2	0.790421		254	0.0205188	0.629771	0.411212	1	0.893164		254	0.0602489	0.685072	0.0409525	1	0.889971		254	0.385027	0.783019	0.00707086	1	0.762645		254
255	0.0446552	0.684932	0.207755	1	0.908655		255	0.547241	0.854015	0.0150136	1	0.769295		25	0.00726099	0.0888889	0.688641	2	0.7258		128	0.36432	0.786325	0.0767505	2	0.790421		255	0.0208911	0.629771	0.409529	1	0.893164		255	0.0604137	0.685072	0.0408884	1	0.889971		255	0.385197	0.783019	0.00706731	1	0.762645		255
256	0.0446552	0.686888	0.206013	1	0.908655		256	0.547241	0.861314	0.0150084	1	0.769295		26	0.00726099	0.0944444	0.684949	2	0.7258		129	0.373418	0.786325	0.0751122	2	0.790421		256	0.0208911	0.631679	0.409408	1	0.893164		256	0.0604137	0.687117	0.0408682	1	0.889971		256	0.395309	0.783019	0.00670043	1	0.762645		256
257	0.0455172	0.686888	0.204249	1	0.908655		257	0.557069	0.861314	0.0144258	1	0.769295		27	0.00968132	0.0944444	0.594107	2	0.7258		130	0.373418	0.794872	0.0750807	2	0.790421		257	0.0215116	0.631679	0.407817	1	0.893164		257	0.0605786	0.687117	0.040849	1	0.889971		257	0.395309	0.792453	0.0067004	1	0.762645		257
258	0.0455172	0.690802	0.202885	1	0.908655		258	0.557069	0.868613	0.014419	1	0.769295		28	0.00968132	0.1	0.590497	2	0.7258		131	0.380538	0.794872	0.0740005	2	0.790421		258	0.0215116	0.633588	0.407396	1	0.893164		258	0.0605786	0.689162	0.0408048	1	0.889971		258	0.415959	0.792453	0.00606966	1	0.762645		258
259	0.0456897	0.690802	0.201474	1	0.908655		259	0.575	0.868613	0.0131075	1	0.769295		29	0.0104881	0.1	0.582049	2	0.7258		132	0.380538	0.803419	0.0738941	2	0.790421		259	0.0221735	0.633588	0.405455	1	0.893164		259	0.0637105	0.689162	0.03986	1	0.889971		259	0.416128	0.792453	0.00606868	1	0.762645		259
260	0.0456897	0.692759	0.200866	1	0.908655		260	0.575345	0.868613	0.0130867	1	0.769295		30	0.0104881	0.105556	0.579161	2	0.7258		133	0.38212	0.803419	0.0733956	2	0.790421		260	0.0221735	0.635496	0.404988	1	0.893164		260	0.0637105	0.691207	0.0398273	1	0.889971		260	0.430489	0.792453	0.00571973	1	0.762645		260
261	0.0458621	0.692759	0.200763	1	0.908655		261	0.578276	0.868613	0.0128891	1	0.769295		31	0.0106898	0.105556	0.57877	2	0.7258		134	0.382911	0.803419	0.0733058	2	0.790421		261	0.0233318	0.635496	0.400341	1	0.893164		261	0.063793	0.691207	0.0397481	1	0.889971		261	0.430659	0.792453	0.00571839	1	0.762645		261
262	0.0462069	0.692759	0.200318	1	0.908655		262	0.578276	0.875912	0.0128818	1	0.769295		32	0.0106898	0.111111	0.575305	2	0.7258		135	0.409415	0.803419	0.0679273	2	0.790421		262	0.0233318	0.637405	0.400219	1	0.893164		262	0.0641226	0.691207	0.0396882	1	0.889971		262	0.437373	0.792453	0.00554833	1	0.762645		262
263	0.0465517	0.692759	0.199053	1	0.908655		263	0.578448	0.875912	0.0128797	1	0.769295		33	0.0112949	0.111111	0.556527	2	0.7258		136	0.409415	0.811966	0.0676715	2	0.790421		263	0.0242833	0.637405	0.396155	1	0.893164		263	0.0643699	0.691207	0.0395949	1	0.889971		263	0.437373	0.801887	0.00554517	1	0.762645		263
264	0.0465517	0.694716	0.198467	1	0.908655		264	0.578448	0.883212	0.0128776	1	0.769295		34	0.0112949	0.122222	0.538081	2	0.7258		137	0.43394	0.811966	0.0631933	2	0.790421		264	0.0242833	0.639313	0.396136	1	0.893164		264	0.0643699	0.693252	0.0395407	1	0.889971		264	0.451054	0.801887	0.00518331	1	0.762645		264
265	0.0475862	0.694716	0.195753	1	0.908655		265	0.586897	0.883212	0.0123531	1	0.769295		35	0.0151271	0.122222	0.415162	2	0.7258		138	0.43394	0.820513	0.0630673	2	0.790421		265	0.0243247	0.639313	0.396109	1	0.893164		265	0.0662656	0.693252	0.0390784	1	0.889971		265	0.451054	0.811321	0.00518328	1	0.762645		265
266	0.0475862	0.696673	0.194226	1	0.908655		266	0.586897	0.890511	0.0123285	1	0.769295		36	0.0151271	0.127778	0.414719	2	0.7258		139	0.4375	0.820513	0.0620234	2	0.790421		266	0.0243247	0.641221	0.395986	1	0.893164		266	0.0664304	0.693252	0.0390639	1	0.889971		266	0.468559	0.811321	0.0047784	1	0.762645		266
267	0.047931	0.696673	0.193753	1	0.908655		267	0.627069	0.890511	0.0102906	1	0.769295		37	0.0159338	0.127778	0.399299	2	0.7258		140	0.4375	0.82906	0.0620166	2	0.790421		267	0.024697	0.641221	0.394347	1	0.893164		267	0.0667601	0.693252	0.0389329	1	0.889971		267	0.468559	0.820755	0.00477598	1	0.762645		267
268	0.047931	0.700587	0.191414	1	0.908655		268	0.627069	0.89781	0.0102893	1	0.769295		38	0.0163372	0.127778	0.398487	2	0.7258		141	0.444225	0.82906	0.0602293	2	0.790421		268	0.024697	0.64313	0.39429	1	0.893164		268	0.0667601	0.695297	0.0389264	1	0.889971		268	0.473487	0.820755	0.00466696	1	0.762645		268
269	0.0487931	0.700587	0.187118	1	0.908655		269	0.636207	0.89781	0.00985843	1	0.769295		39	0.0181525	0.127778	0.370837	2	0.7258		142	0.444225	0.846154	0.0599957	2	0.790421		269	0.0268895	0.64313	0.387439	1	0.893164		269	0.0677491	0.695297	0.0386682	1	0.889971		269	0.473487	0.830189	0.00466322	1	0.762645		269
270	0.0487931	0.702544	0.187063	1	0.908655		270	0.636207	0.905109	0.00985343	1	0.769295		40	0.0185559	0.127778	0.370276	2	0.7258		143	0.45807	0.846154	0.0580197	2	0.790421		270	0.0268895	0.645038	0.387395	1	0.893164		270	0.0677491	0.697342	0.0386604	1	0.889971		270	0.474082	0.830189	0.00464266	1	0.762645		270
271	0.0493103	0.702544	0.184441	1	0.908655		271	0.647069	0.905109	0.00943771	1	0.769295		41	0.0209762	0.127778	0.322823	2	0.7258		144	0.45807	0.854701	0.0580174	2	0.790421		271	0.0269722	0.645038	0.386935	1	0.893164		271	0.0695624	0.697342	0.0383106	1	0.889971		271	0.474252	0.830189	0.00464075	1	0.762645		271
272	0.0493103	0.706458	0.182718	1	0.908655		272	0.647069	0.912409	0.00942747	1	0.769295		42	0.0209762	0.133333	0.319502	2	0.7258		145	0.469937	0.854701	0.0564453	2	0.790421		272	0.0269722	0.646947	0.386543	1	0.893164		272	0.0695624	0.699387	0.0383036	1	0.889971		272	0.489123	0.830189	0.00430108	1	0.762645		272
273	0.0498276	0.706458	0.178912	1	0.908655		273	0.685172	0.912409	0.00756614	1	0.769295		43	0.0248084	0.133333	0.283256	2	0.7258		146	0.469937	0.863248	0.0563168	2	0.790421		273	0.0328466	0.646947	0.369755	1	0.893164		273	0.0721998	0.699387	0.0376987	1	0.889971		273	0.489123	0.839623	0.00430049	1	0.762645		273
274	0.0498276	0.708415	0.178395	1	0.908655		274	0.685172	0.919708	0.0075661	1	0.769295		44	0.0248084	0.138889	0.281404	2	0.7258		147	0.505538	0.863248	0.0506368	2	0.790421		274	0.0328466	0.648855	0.369688	1	0.893164		274	0.0721998	0.701431	0.0376728	1	0.889971		274	0.494392	0.839623	0.00419078	1	0.762645		274
275	0.0513793	0.708415	0.173613	1	0.908655		275	0.685517	0.919708	0.00755924	1	0.769295		45	0.0262203	0.138889	0.273742	2	0.7258		148	0.505538	0.871795	0.0504815	2	0.790421		275	0.0330948	0.648855	0.368834	1	0.893164		275	0.0722822	0.701431	0.0376722	1	0.889971		275	0.494392	0.849057	0.00418985	1	0.762645		275
276	0.0513793	0.710372	0.173285	1	0.908655		276	0.685517	0.927007	0.0075539	1	0.769295		46	0.0262203	0.144444	0.271062	2	0.7258		149	0.518196	0.871795	0.0487663	2	0.790421		276	0.0330948	0.650763	0.368451	1	0.893164		276	0.0722822	0.703476	0.0376386	1	0.889971		276	0.513086	0.849057	0.00381432	1	0.762645		276
277	0.052069	0.710372	0.171804	1	0.908655		277	0.704655	0.927007	0.00683492	1	0.769295		47	0.0272287	0.144444	0.267574	2	0.7258		150	0.518196	0.880342	0.0487557	2	0.790421		277	0.0337153	0.650763	0.366751	1	0.893164		277	0.0728591	0.703476	0.0375157	1	0.889971		277	0.513256	0.849057	0.00381168	1	0.762645		277
278	0.052069	0.714286	0.170949	1	0.908655		278	0.704655	0.934307	0.00682585	1	0.769295		48	0.0272287	0.15	0.266825	2	0.7258		151	0.530063	0.880342	0.0470892	2	0.790421		278	0.0337153	0.652672	0.36671	1	0.893164		278	0.0728591	0.705521	0.0375019	1	0.889971		278	0.516315	0.849057	0.00373556	1	0.762645		278
279	0.0524138	0.714286	0.170836	1	0.908655		279	0.704828	0.934307	0.00682249	1	0.769295		49	0.0276321	0.15	0.261861	2	0.7258		152	0.530063	0.888889	0.0470793	2	0.790421		279	0.0342531	0.652672	0.365155	1	0.893164		279	0.0737658	0.705521	0.0373229	1	0.889971		279	0.516315	0.858491	0.00373486	1	0.762645		279
280	0.0532759	0.714286	0.167257	1	0.908655		280	0.704828	0.941606	0.0068079	1	0.769295		50	0.0276321	0.155556	0.26104	2	0.7258		153	0.538766	0.888889	0.0459908	2	0.790421		280	0.0342531	0.65458	0.364946	1	0.893164		280	0.0739306	0.705521	0.0372841	1	0.889971		280	0.517675	0.858491	0.00370567	1	0.762645		280
281	0.0532759	0.716243	0.167091	1	0.908655		281	0.706897	0.941606	0.00669194	1	0.769295		51	0.0280355	0.155556	0.256157	2	0.7258		154	0.538766	0.897436	0.0459832	2	0.790421		281	0.0351218	0.65458	0.363748	1	0.893164		281	0.0754142	0.705521	0.0368166	1	0.889971		281	0.517845	0.858491	0.00370458	1	0.762645		281
282	0.0536207	0.716243	0.166942	1	0.908655		282	0.707241	0.941606	0.00669119	1	0.769295		52	0.0280355	0.161111	0.255317	2	0.7258		155	0.542326	0.897436	0.0456088	2	0.790421		282	0.0351218	0.656489	0.363746	1	0.893164		282	0.0754142	0.707566	0.0368128	1	0.889971		282	0.524983	0.858491	0.00359195	1	0.762645		282
283	0.0536207	0.7182	0.166111	1	0.908655		283	0.713966	0.941606	0.00645675	1	0.769295		53	0.0326745	0.161111	0.228706	2	0.7258		156	0.542326	0.905983	0.0454294	2	0.790421		283	0.0355769	0.656489	0.362401	1	0.893164		283	0.0768153	0.707566	0.0364721	1	0.889971		283	0.525153	0.858491	0.00359189	1	0.762645		283
284	0.0537931	0.7182	0.165231	1	0.908655		284	0.71431	0.941606	0.00645159	1	0.769295		54	0.0326745	0.166667	0.2284	2	0.7258		157	0.55538	0.905983	0.0430064	2	0.790421		284	0.0355769	0.658397	0.362151	1	0.893164		284	0.0769801	0.707566	0.0364662	1	0.889971		284	0.558379	0.858491	0.00308347	1	0.762645		284
285	0.0541379	0.7182	0.16484	1	0.908655		285	0.738793	0.941606	0.00561668	1	0.769295		55	0.0332795	0.166667	0.223241	2	0.7258		158	0.55538	0.91453	0.0429959	2	0.790421		285	0.0357837	0.658397	0.361841	1	0.893164		285	0.0779692	0.707566	0.036251	1	0.889971		285	0.558549	0.858491	0.00308154	1	0.762645		285
286	0.0548276	0.7182	0.163701	1	0.908655		286	0.738793	0.948905	0.00561257	1	0.769295		56	0.0336829	0.166667	0.222945	2	0.7258		159	0.562104	0.91453	0.04224	2	0.790421		286	0.0357837	0.660305	0.361834	1	0.893164		286	0.078134	0.707566	0.0362392	1	0.889971		286	0.567896	0.858491	0.00294051	1	0.762645		286
287	0.0548276	0.720157	0.163377	1	0.908655		287	0.751207	0.948905	0.00527624	1	0.769295		57	0.0340863	0.166667	0.220848	2	0.7258		160	0.562104	0.923077	0.0421919	2	0.790421		287	0.0363629	0.660305	0.360872	1	0.893164		287	0.0787934	0.707566	0.0359691	1	0.889971		287	0.567896	0.867925	0.00293694	1	0.762645		287
288	0.0558621	0.720157	0.160958	1	0.908655		288	0.751724	0.948905	0.00527427	1	0.769295		58	0.0344897	0.166667	0.219936	2	0.7258		161	0.641218	0.923077	0.0317226	2	0.790421		288	0.0363629	0.662214	0.360801	1	0.893164		288	0.0789582	0.707566	0.0359215	1	0.889971		288	0.571975	0.867925	0.0028777	1	0.762645		288
289	0.0558621	0.722114	0.160765	1	0.908655		289	0.759138	0.948905	0.00503948	1	0.769295		59	0.0350948	0.166667	0.218664	2	0.7258		162	0.641218	0.931624	0.0316627	2	0.790421		289	0.0368179	0.662214	0.359742	1	0.893164		289	0.0795352	0.707566	0.0357738	1	0.889971		289	0.571975	0.877358	0.0028767	1	0.762645		289
290	0.0565517	0.722114	0.15887	1	0.908655		290	0.759138	0.956204	0.00503167	1	0.769295		60	0.0350948	0.172222	0.218454	2	0.7258		163	0.654668	0.931624	0.0300434	2	0.790421		290	0.0368179	0.664122	0.359682	1	0.893164		290	0.0795352	0.709611	0.0357163	1	0.889971		290	0.575969	0.877358	0.00282512	1	0.762645		290
291	0.0565517	0.72407	0.158621	1	0.908655		291	0.76931	0.956204	0.00467678	1	0.769295		61	0.0409439	0.172222	0.19887	2	0.7258		164	0.654668	0.940171	0.0300168	2	0.790421		291	0.0376039	0.664122	0.357558	1	0.893164		291	0.0797824	0.709611	0.0355327	1	0.889971		291	0.576139	0.877358	0.00282195	1	0.762645		0
292	0.0565517	0.727984	0.158075	1	0.908655		292	0.76931	0.963504	0.00467322	1	0.769295		62	0.0409439	0.177778	0.198017	2	0.7258		165	0.716377	0.940171	0.0234904	2	0.790421		292	0.0376039	0.666031	0.357483	1	0.893164		292	0.0797824	0.713701	0.0355073	1	0.889971		292	0.585486	0.877358	0.0027014	1	0.762645		1
293	0.0565517	0.729941	0.157238	1	0.908655		293	0.77431	0.963504	0.00457309	1	0.769295		63	0.043566	0.177778	0.191398	2	0.7258		166	0.716377	0.948718	0.0234545	2	0.790421		293	0.0382658	0.666031	0.356068	1	0.893164		293	0.0855518	0.713701	0.0343256	1	0.889971		293	0.585656	0.877358	0.00269953	1	0.762645		2
294	0.057931	0.729941	0.153749	1	0.908655		294	0.77431	0.970803	0.00456759	1	0.769295		64	0.043566	0.183333	0.191074	2	0.7258		167	0.720728	0.948718	0.0232044	2	0.790421		294	0.0382658	0.667939	0.355996	1	0.893164		294	0.0857166	0.713701	0.0343208	1	0.889971		294	0.595853	0.877358	0.00255094	1	0.762645		3
295	0.0582759	0.729941	0.153576	1	0.908655		295	0.784655	0.970803	0.00425921	1	0.769295		65	0.0439693	0.183333	0.19028	2	0.7258		168	0.720728	0.957265	0.0231518	2	0.790421		295	0.0383072	0.667939	0.355909	1	0.893164		295	0.0864584	0.713701	0.0341961	1	0.889971		295	0.595853	0.886792	0.00255014	1	0.762645		4
296	0.0596552	0.729941	0.150411	1	0.908655		296	0.784655	0.978102	0.00424925	1	0.769295		66	0.0439693	0.188889	0.188893	2	0.7258		169	0.750396	0.957265	0.0206064	2	0.790421		296	0.0383072	0.669847	0.3557	1	0.893164		296	0.0864584	0.715746	0.0341876	1	0.889971		296	0.600867	0.886792	0.00247283	1	0.762645		5
297	0.0596552	0.731898	0.150402	1	0.908655		297	0.803448	0.978102	0.00369085	1	0.769295		67	0.0447761	0.188889	0.183889	2	0.7258		170	0.750396	0.965812	0.0205812	2	0.790421		297	0.0397551	0.669847	0.352422	1	0.893164		297	0.0872826	0.715746	0.0340254	1	0.889971		297	0.600867	0.896226	0.00247273	1	0.762645		6
298	0.06	0.731898	0.149561	1	0.908655		298	0.803793	0.978102	0.00369077	1	0.769295		68	0.0447761	0.194444	0.183829	2	0.7258		171	0.78481	0.965812	0.0178213	2	0.790421		298	0.0397551	0.671756	0.352384	1	0.893164		298	0.0872826	0.719836	0.0340181	1	0.889971		298	0.602566	0.896226	0.00245491	1	0.762645		7
299	0.06	0.735812	0.147635	1	0.908655		299	0.847069	0.978102	0.00262881	1	0.769295		69	0.0453812	0.194444	0.182482	2	0.7258		172	0.78481	0.974359	0.0178037	2	0.790421		299	0.0403756	0.671756	0.350733	1	0.893164		299	0.090497	0.719836	0.0333739	1	0.889971		299	0.602736	0.896226	0.00245436	1	0.762645		8
300	0.0610345	0.735812	0.144995	1	0.908655		300	0.847414	0.978102	0.00262205	1	0.769295		70	0.0453812	0.2	0.181742	2	0.7258		173	0.831092	0.974359	0.0136698	2	0.790421		300	0.0403756	0.673664	0.350686	1	0.893164		300	0.090497	0.721881	0.0333423	1	0.889971		300	0.604946	0.896226	0.00243585	1	0.762645		9
301	0.0610345	0.737769	0.143578	1	0.908655		301	0.858793	0.978102	0.00238392	1	0.769295		71	0.0480032	0.2	0.171652	2	0.7258		174	0.831092	0.982906	0.0136158	2	0.790421		301	0.0447193	0.673664	0.340786	1	0.893164		301	0.097173	0.721881	0.0319201	1	0.889971		301	0.605116	0.896226	0.00243536	1	0.762645		10
302	0.0613793	0.737769	0.143182	1	0.908655		302	0.858793	0.985401	0.00238068	1	0.769295		72	0.0480032	0.205556	0.17137	2	0.7258		175	0.831883	0.982906	0.0135845	2	0.790421		302	0.0447193	0.675573	0.340421	1	0.893164		302	0.097173	0.723926	0.0319095	1	0.889971		302	0.606645	0.896226	0.00241363	1	0.762645		11
303	0.0613793	0.739726	0.142913	1	0.908655		303	0.884655	0.985401	0.001862	1	0.769295		73	0.0566761	0.205556	0.151774	2	0.7258		176	0.831883	0.991453	0.0135444	2	0.790421		303	0.0460845	0.675573	0.336825	1	0.893164		303	0.0973378	0.723926	0.0318903	1	0.889971		303	0.6069	0.896226	0.00241196	1	0.762645		12
304	0.0627586	0.739726	0.139682	1	0.908655		304	0.884655	0.992701	0.00186141	1	0.769295		74	0.0566761	0.211111	0.151528	2	0.7258		177	0.838608	0.991453	0.0129351	2	0.790421		304	0.0460845	0.677481	0.336788	1	0.893164		304	0.0973378	0.725971	0.0318761	1	0.889971		304	0.612339	0.896226	0.0023498	1	0.762645		13
305	0.0627586	0.741683	0.139092	1	0.908655		305	0.977931	0.992701	0.000313383	1	0.769295		75	0.0584913	0.211111	0.149803	2	0.7258		178	0.839399	0.991453	0.0129032	2	0.790421		305	0.0539445	0.677481	0.320746	1	0.893164		305	0.098739	0.725971	0.0316696	1	0.889971		305	0.612508	0.896226	0.00234956	1	0.762645		14
306	0.0631034	0.741683	0.138811	1	0.908655		306	0.977931	1	0.000312649	1	0.769295		76	0.0584913	0.216667	0.149564	2	0.7258		179	0.915744	0.991453	0.00717629	2	0.790421		306	0.0539445	0.679389	0.320736	1	0.893164		306	0.0989038	0.725971	0.0316135	1	0.889971		306	0.62415	0.896226	0.00222088	1	0.762645		15
307	0.0634483	0.741683	0.137787	1	0.908655		307	0.986207	1	0.000218759	1	0.769295		77	0.0619201	0.216667	0.144171	2	0.7258		180	0.915744	1	0.0071131	2	0.790421		307	0.0540686	0.679389	0.320079	1	0.893164		307	0.103354	0.725971	0.0308443	1	0.889971		307	0.62432	0.896226	0.00222076	1	0.762645		16
308	0.0658621	0.741683	0.133873	1	0.908655		308	0.986552	1	0.000217941	1	0.769295		78	0.0623235	0.216667	0.144095	2	0.7258		181	1	1	0.000419471	2	0.790421		308	0.0540686	0.681298	0.319995	1	0.893164		308	0.103519	0.725971	0.0308235	1	0.889971		308	0.629929	0.896226	0.00216477	1	0.762645		17
309	0.0658621	0.74364	0.133294	1	0.908655		309	1	1	2.48088e-05	1	0.769295		79	0.0675676	0.216667	0.136939	2	0.7258		0	0	0	1.99606	3	0.757884		309	0.0551855	0.681298	0.316996	1	0.893164		309	0.103602	0.725971	0.0307991	1	0.889971		309	0.630099	0.896226	0.00216322	1	0.762645		18
310	0.0660345	0.74364	0.132693	1	0.908655		0	0	0	1.99984	2	0.748066		80	0.0675676	0.222222	0.13679	2	0.7258		1	0	0.00584795	0.996057	3	0.757884		310	0.0551855	0.683206	0.316913	1	0.893164		310	0.103767	0.725971	0.0307932	1	0.889971		310	0.632478	0.896226	0.00213116	1	0.762645		19
311	0.0660345	0.745597	0.130956	1	0.908655		1	0	0.0042735	0.99984	2	0.748066		81	0.0695845	0.222222	0.133932	2	0.7258		2	0	0.0233918	0.985951	3	0.757884		311	0.0575435	0.683206	0.311941	1	0.893164		311	0.108382	0.725971	0.0298983	1	0.889971		311	0.632648	0.896226	0.00213009	1	0.762645		20
312	0.0663793	0.745597	0.130443	1	0.908655		2	0	0.0128205	0.999378	2	0.748066		82	0.0695845	0.227778	0.133794	2	0.7258		3	0	0.0350877	0.944667	3	0.757884		312	0.0575435	0.685115	0.311928	1	0.893164		312	0.108382	0.728016	0.0298916	1	0.889971		312	0.634262	0.896226	0.00210919	1	0.762645		21
313	0.0663793	0.747554	0.130149	1	0.908655		3	0	0.017094	0.998707	2	0.748066		83	0.0697862	0.227778	0.133782	2	0.7258		4	0	0.0409357	0.931164	3	0.757884		313	0.0581227	0.685115	0.310666	1	0.893164		313	0.109041	0.728016	0.0298248	1	0.889971		313	0.634432	0.896226	0.0021089	1	0.762645		22
314	0.0667241	0.747554	0.12951	1	0.908655		4	0	0.025641	0.998541	2	0.748066		84	0.0697862	0.233333	0.133149	2	0.7258		5	0.000476644	0.0409357	0.912439	3	0.757884		314	0.0581227	0.687023	0.310583	1	0.893164		314	0.109041	0.730061	0.0298216	1	0.889971		314	0.635282	0.896226	0.0020985	1	0.762645		23
315	0.0667241	0.749511	0.129491	1	0.908655		5	0.000350816	0.025641	0.995589	2	0.748066		85	0.0748286	0.233333	0.127068	2	0.7258		6	0.000476644	0.0467836	0.908893	3	0.757884		315	0.0584123	0.687023	0.310026	1	0.893164		315	0.112091	0.730061	0.0293495	1	0.889971		315	0.635452	0.896226	0.00209814	1	0.762645		24
316	0.0681034	0.749511	0.127234	1	0.908655		6	0.000350816	0.0470085	0.989458	2	0.748066		86	0.0748286	0.238889	0.12652	2	0.7258		7	0.000953289	0.0467836	0.874851	3	0.757884		316	0.0584123	0.688931	0.309974	1	0.893164		316	0.112256	0.730061	0.0293296	1	0.889971		316	0.637407	0.896226	0.00208019	1	0.762645		25
317	0.0681034	0.751468	0.126511	1	0.908655		7	0.000701631	0.0470085	0.982451	2	0.748066		87	0.075837	0.238889	0.125774	2	0.7258		8	0.000953289	0.0701754	0.785156	3	0.757884		317	0.0591155	0.688931	0.308472	1	0.893164		317	0.112256	0.732106	0.0293177	1	0.889971		317	0.637576	0.896226	0.00207977	1	0.762645		26
318	0.0696552	0.751468	0.123722	1	0.908655		8	0.000701631	0.0512821	0.978839	2	0.748066		88	0.0762404	0.238889	0.125743	2	0.7258		9	0.00238322	0.0701754	0.702558	3	0.757884		318	0.0591155	0.69084	0.308338	1	0.893164		318	0.112586	0.732106	0.0292838	1	0.889971		318	0.639446	0.896226	0.00205553	1	0.762645		27
319	0.0696552	0.753425	0.123642	1	0.908655		9	0.00105245	0.0512821	0.96996	2	0.748066		89	0.0764421	0.238889	0.125614	2	0.7258		10	0.00238322	0.0818713	0.619747	3	0.757884		319	0.0596533	0.69084	0.307403	1	0.893164		319	0.112586	0.736196	0.0292701	1	0.889971		319	0.639616	0.896226	0.00205451	1	0.762645		28
320	0.0698276	0.753425	0.123346	1	0.908655		10	0.00105245	0.0555556	0.969348	2	0.748066		90	0.0764421	0.244444	0.125544	2	0.7258		11	0.00333651	0.0818713	0.602047	3	0.757884		320	0.0596533	0.692748	0.30734	1	0.893164		320	0.113904	0.736196	0.0290315	1	0.889971		320	0.64276	0.896226	0.00201952	1	0.762645		29
321	0.0698276	0.755382	0.123295	1	0.908655		11	0.00175408	0.0555556	0.950882	2	0.748066		91	0.0768455	0.244444	0.12516	2	0.7258		12	0.00333651	0.0877193	0.582477	3	0.757884		321	0.0610599	0.692748	0.30441	1	0.893164		321	0.113904	0.738241	0.0290207	1	0.889971		321	0.64276	0.90566	0.00201859	1	0.762645		30
322	0.0731034	0.755382	0.117592	1	0.908655		12	0.00175408	0.0641026	0.947711	2	0.748066		92	0.115571	0.338889	0.125	2	0.7258		13	0.00524309	0.0877193	0.510468	3	0.757884		322	0.0610599	0.694656	0.304207	1	0.893164		322	0.119426	0.738241	0.0280913	1	0.889971		322	0.649218	0.90566	0.0019569	1	0.762645		31
323	0.0731034	0.757339	0.116693	1	0.908655		13	0.00192949	0.0641026	0.944426	2	0.748066		93	0.116176	0.338889	0.124886	2	0.7258		14	0.00524309	0.0935673	0.498193	3	0.757884		323	0.0626732	0.694656	0.300511	1	0.893164		323	0.119426	0.740286	0.0280611	1	0.889971		323	0.649388	0.90566	0.00195653	1	0.762645		32
324	0.0743103	0.757339	0.113416	1	0.908655		14	0.00192949	0.0683761	0.938254	2	0.748066		94	0.116176	0.344444	0.124847	2	0.7258		15	0.00571973	0.0935673	0.462485	3	0.757884		324	0.0626732	0.696565	0.300491	1	0.893164		324	0.121899	0.740286	0.0277341	1	0.889971		324	0.656016	0.90566	0.00188426	1	0.762645		33
325	0.0746552	0.757339	0.113019	1	0.908655		15	0.00192949	0.0769231	0.930041	2	0.748066		95	0.117789	0.344444	0.124492	2	0.7258		16	0.00571973	0.0994152	0.432062	3	0.757884		325	0.0644521	0.696565	0.297261	1	0.893164		325	0.121899	0.742331	0.0277316	1	0.889971		325	0.656186	0.90566	0.00188307	1	0.762645		34
326	0.0751724	0.757339	0.112329	1	0.908655		16	0.0022803	0.0769231	0.92856	2	0.748066		96	0.117789	0.35	0.124472	2	0.7258		17	0.00667302	0.0994152	0.423042	3	0.757884		326	0.0644521	0.698473	0.297214	1	0.893164		326	0.121981	0.742331	0.0277225	1	0.889971		326	0.656781	0.90566	0.00187766	1	0.762645		35
327	0.0751724	0.761252	0.112182	1	0.908655		17	0.00263112	0.0769231	0.916786	2	0.748066		97	0.12142	0.35	0.123713	2	0.7258		18	0.00667302	0.111111	0.416479	3	0.757884		327	0.0689612	0.698473	0.289299	1	0.893164		327	0.122146	0.742331	0.0277078	1	0.889971		327	0.656781	0.915094	0.0018768	1	0.762645		36
328	0.0753448	0.761252	0.111419	1	0.908655		18	0.00263112	0.0811966	0.916223	2	0.748066		98	0.12142	0.355556	0.12368	2	0.7258		19	0.0085796	0.111111	0.402807	3	0.757884		328	0.0689612	0.700382	0.289292	1	0.893164		328	0.122311	0.742331	0.0276853	1	0.889971		328	0.668253	0.915094	0.00175867	1	0.762645		37
329	0.0753448	0.765166	0.111413	1	0.908655		19	0.00350816	0.0811966	0.902563	2	0.748066		99	0.121622	0.355556	0.123637	2	0.7258		20	0.0085796	0.116959	0.382668	3	0.757884		329	0.0708642	0.700382	0.28596	1	0.893164		329	0.122476	0.742331	0.0276819	1	0.889971		329	0.668423	0.915094	0.0017582	1	0.762645		38
330	0.0775862	0.765166	0.104694	1	0.908655		20	0.00350816	0.0854701	0.901885	2	0.748066		100	0.121622	0.361111	0.123551	2	0.7258		21	0.00905624	0.116959	0.379491	3	0.757884		330	0.0708642	0.70229	0.285934	1	0.893164		330	0.124124	0.742331	0.027371	1	0.889971		330	0.669613	0.915094	0.00174569	1	0.762645		39
331	0.0775862	0.767123	0.104246	1	0.908655		21	0.00508683	0.0854701	0.8609	2	0.748066		101	0.122227	0.361111	0.123463	2	0.7258		22	0.00905624	0.128655	0.368109	3	0.757884		331	0.0711538	0.70229	0.285416	1	0.893164		331	0.124124	0.744376	0.0273663	1	0.889971		331	0.669613	0.924528	0.00174495	1	0.762645		40
332	0.0843103	0.767123	0.0972412	1	0.908655		22	0.00543764	0.0854701	0.853957	2	0.748066		102	0.122227	0.366667	0.123447	2	0.7258		23	0.0123928	0.128655	0.335478	3	0.757884		332	0.0711538	0.704198	0.28536	1	0.893164		332	0.125196	0.744376	0.0272201	1	0.889971		332	0.682274	0.924528	0.00163433	1	0.762645		41
333	0.0843103	0.76908	0.0970104	1	0.908655		23	0.00543764	0.0940171	0.853789	2	0.748066		103	0.123033	0.366667	0.123336	2	0.7258		24	0.0123928	0.140351	0.332732	3	0.757884		333	0.0714847	0.704198	0.28482	1	0.893164		333	0.125196	0.746421	0.0272117	1	0.889971		333	0.682444	0.924528	0.00163419	1	0.762645		42
334	0.0846552	0.76908	0.0966001	1	0.908655		24	0.00543764	0.0982906	0.852203	2	0.748066		104	0.123033	0.372222	0.123326	2	0.7258		25	0.0142993	0.140351	0.321883	3	0.757884		334	0.0714847	0.706107	0.284787	1	0.893164		334	0.12602	0.746421	0.0271461	1	0.889971		334	0.688307	0.924528	0.00158085	1	0.762645		43
335	0.0846552	0.772994	0.0963258	1	0.908655		25	0.00561305	0.0982906	0.849742	2	0.748066		105	0.123437	0.372222	0.123247	2	0.7258		26	0.0142993	0.152047	0.319194	3	0.757884		335	0.072974	0.706107	0.281591	1	0.893164		335	0.12602	0.748466	0.0271436	1	0.889971		335	0.688477	0.924528	0.00158072	1	0.762645		44
336	0.0855172	0.772994	0.0952783	1	0.908655		26	0.00561305	0.102564	0.848769	2	0.748066		106	0.123437	0.377778	0.12317	2	0.7258		27	0.014776	0.152047	0.316864	3	0.757884		336	0.072974	0.708015	0.281584	1	0.893164		336	0.126432	0.748466	0.0270832	1	0.889971		336	0.694086	0.924528	0.0015421	1	0.762645		45
337	0.0855172	0.774951	0.0952151	1	0.908655		27	0.00561305	0.111111	0.848254	2	0.748066		107	0.126059	0.377778	0.122905	2	0.7258		28	0.014776	0.157895	0.315732	3	0.757884		337	0.0750424	0.708015	0.278206	1	0.893164		337	0.126597	0.748466	0.0270693	1	0.889971		337	0.694256	0.924528	0.00154188	1	0.762645		46
338	0.0898276	0.774951	0.091644	1	0.908655		28	0.00596387	0.111111	0.846664	2	0.748066		108	0.126059	0.383333	0.122875	2	0.7258		29	0.0157293	0.157895	0.313583	3	0.757884		338	0.0750424	0.709924	0.278008	1	0.893164		338	0.128328	0.748466	0.0268226	1	0.889971		338	0.695445	0.924528	0.00153452	1	0.762645		47
339	0.0898276	0.776908	0.0915413	1	0.908655		29	0.00649009	0.111111	0.840031	2	0.748066		109	0.126261	0.383333	0.122828	2	0.7258		30	0.0157293	0.163743	0.309355	3	0.757884		339	0.0785587	0.709924	0.272186	1	0.893164		339	0.128328	0.750511	0.0268084	1	0.889971		339	0.695615	0.924528	0.0015344	1	0.762645		48
340	0.0908621	0.776908	0.0907046	1	0.908655		30	0.00684091	0.111111	0.837567	2	0.748066		110	0.126261	0.388889	0.122784	2	0.7258		31	0.0166826	0.163743	0.307328	3	0.757884		340	0.0785587	0.71374	0.272142	1	0.893164		340	0.128905	0.750511	0.0267434	1	0.889971		340	0.703263	0.924528	0.00146902	1	0.762645		49
341	0.0908621	0.778865	0.0902378	1	0.908655		31	0.00701631	0.111111	0.833055	2	0.748066		111	0.127067	0.388889	0.122656	2	0.7258		32	0.0166826	0.169591	0.30462	3	0.757884		341	0.0790551	0.71374	0.271067	1	0.893164		341	0.128905	0.752556	0.0267244	1	0.889971		341	0.703263	0.933962	0.00146883	1	0.762645		50
342	0.092069	0.778865	0.0893016	1	0.908655		32	0.00736713	0.111111	0.818227	2	0.748066		112	0.127067	0.394444	0.122562	2	0.7258		33	0.0171592	0.169591	0.297092	3	0.757884		342	0.0790551	0.715649	0.271048	1	0.893164		342	0.129317	0.752556	0.0266587	1	0.889971		342	0.705897	0.933962	0.00144526	1	0.762645		51
343	0.092069	0.780822	0.0892966	1	0.908655		33	0.00789335	0.111111	0.799942	2	0.748066		113	0.130496	0.394444	0.121978	2	0.7258		34	0.0171592	0.181287	0.287942	3	0.757884		343	0.0815786	0.715649	0.266887	1	0.893164		343	0.129482	0.752556	0.0266549	1	0.889971		343	0.706067	0.933962	0.00144416	1	0.762645		52
344	0.0958621	0.780822	0.0857048	1	0.908655		34	0.00789335	0.115385	0.79736	2	0.748066		114	0.130496	0.4	0.121892	2	0.7258		35	0.0200191	0.181287	0.282088	3	0.757884		344	0.0815786	0.717557	0.266868	1	0.893164		344	0.132284	0.752556	0.0262914	1	0.889971		344	0.714055	0.933962	0.00137615	1	0.762645		53
345	0.0962069	0.780822	0.0856444	1	0.908655		35	0.00824417	0.115385	0.795296	2	0.748066		115	0.13211	0.4	0.121411	2	0.7258		36	0.0200191	0.187135	0.281904	3	0.757884		345	0.083647	0.717557	0.263897	1	0.893164		345	0.132284	0.754601	0.0262551	1	0.889971		345	0.71431	0.933962	0.00137514	1	0.762645		54
346	0.100172	0.780822	0.0821039	1	0.908655		36	0.00859498	0.115385	0.790663	2	0.748066		116	0.13211	0.405556	0.121404	2	0.7258		37	0.0204957	0.187135	0.275423	3	0.757884		346	0.083647	0.721374	0.263571	1	0.893164		346	0.133108	0.754601	0.0261632	1	0.889971		346	0.715075	0.933962	0.00136446	1	0.762645		55
347	0.100172	0.782779	0.082078	1	0.908655		37	0.00859498	0.119658	0.790022	2	0.748066		117	0.133118	0.405556	0.121271	2	0.7258		38	0.021449	0.187135	0.275032	3	0.757884		347	0.0853845	0.721374	0.261185	1	0.893164		347	0.133108	0.756646	0.0261621	1	0.889971		347	0.715245	0.933962	0.00136428	1	0.762645		56
348	0.101207	0.782779	0.0811558	1	0.908655		38	0.0089458	0.119658	0.779373	2	0.748066		118	0.133118	0.411111	0.121173	2	0.7258		39	0.021449	0.192982	0.274284	3	0.757884		348	0.0853845	0.723282	0.261158	1	0.893164		348	0.135333	0.756646	0.0257536	1	0.889971		348	0.717199	0.933962	0.00135087	1	0.762645		57
349	0.101207	0.784736	0.081051	1	0.908655		39	0.00929661	0.119658	0.778881	2	0.748066		119	0.139976	0.411111	0.119773	2	0.7258		40	0.0228789	0.192982	0.266582	3	0.757884		349	0.0882803	0.723282	0.257335	1	0.893164		349	0.135333	0.760736	0.0256992	1	0.889971		349	0.717199	0.943396	0.00135027	1	0.762645		58
350	0.101897	0.784736	0.0804516	1	0.908655		40	0.00982284	0.119658	0.74312	2	0.748066		120	0.139976	0.416667	0.119714	2	0.7258		41	0.0228789	0.19883	0.266431	3	0.757884		350	0.0882803	0.725191	0.257318	1	0.893164		350	0.135993	0.760736	0.025614	1	0.889971		350	0.722383	0.943396	0.00130435	1	0.762645		59
351	0.101897	0.786693	0.0804279	1	0.908655		41	0.00982284	0.123932	0.741555	2	0.748066		121	0.140984	0.416667	0.119474	2	0.7258		42	0.0238322	0.19883	0.263689	3	0.757884		351	0.0897696	0.725191	0.255559	1	0.893164		351	0.136158	0.760736	0.0255982	1	0.889971		351	0.722553	0.943396	0.00130354	1	0.762645		60
352	0.103966	0.786693	0.0786751	1	0.908655		42	0.0114015	0.123932	0.703536	2	0.748066		122	0.140984	0.422222	0.119334	2	0.7258		43	0.0238322	0.210526	0.262422	3	0.757884		352	0.0897696	0.727099	0.255535	1	0.893164		352	0.136405	0.760736	0.025557	1	0.889971		352	0.725612	0.943396	0.00128578	1	0.762645		61
353	0.103966	0.78865	0.0786636	1	0.908655		43	0.0117523	0.123932	0.695352	2	0.748066		123	0.144615	0.422222	0.1186	2	0.7258		44	0.0266921	0.210526	0.255581	3	0.757884		353	0.0898937	0.727099	0.255321	1	0.893164		353	0.136405	0.762781	0.025543	1	0.889971		353	0.725612	0.95283	0.00128569	1	0.762645		62
354	0.104138	0.78865	0.0786436	1	0.908655		44	0.0122785	0.123932	0.688641	2	0.748066		124	0.144615	0.427778	0.118459	2	0.7258		45	0.0266921	0.216374	0.252552	3	0.757884		354	0.0898937	0.729008	0.255194	1	0.893164		354	0.137724	0.762781	0.0253754	1	0.889971		354	0.733939	0.95283	0.00122122	1	0.762645		63
355	0.104138	0.790607	0.07863	1	0.908655		45	0.0122785	0.128205	0.684949	2	0.748066		125	0.14885	0.427778	0.11733	2	0.7258		46	0.028122	0.216374	0.250557	3	0.757884		355	0.0942374	0.729008	0.249383	1	0.893164		355	0.137724	0.764826	0.0253726	1	0.889971		355	0.734109	0.95283	0.0012196	1	0.762645		64
356	0.10431	0.790607	0.0784905	1	0.908655		46	0.0128048	0.128205	0.67922	2	0.748066		126	0.14885	0.433333	0.117242	2	0.7258		47	0.028122	0.22807	0.246129	3	0.757884		356	0.0942374	0.730916	0.249371	1	0.893164		356	0.137806	0.764826	0.0253688	1	0.889971		356	0.743457	0.95283	0.0011574	1	0.762645		65
357	0.10431	0.792564	0.0783257	1	0.908655		47	0.0128048	0.132479	0.659106	2	0.748066		127	0.150464	0.433333	0.116757	2	0.7258		48	0.0290753	0.22807	0.244061	3	0.757884		357	0.0958921	0.730916	0.247101	1	0.893164		357	0.137971	0.764826	0.0253481	1	0.889971		357	0.743457	0.962264	0.00115566	1	0.762645		66
358	0.105172	0.792564	0.0768756	1	0.908655		48	0.013331	0.132479	0.637146	2	0.748066		128	0.150464	0.438889	0.116672	2	0.7258		49	0.0290753	0.233918	0.240189	3	0.757884		358	0.0958921	0.732824	0.247043	1	0.893164		358	0.138713	0.764826	0.0252976	1	0.889971		358	0.775833	0.962264	0.000920576	1	0.762645		67
359	0.105172	0.794521	0.0767815	1	0.908655		49	0.013331	0.136752	0.632931	2	0.748066		129	0.154498	0.438889	0.115527	2	0.7258		50	0.0319352	0.233918	0.233037	3	0.757884		359	0.0962231	0.732824	0.246731	1	0.893164		359	0.138713	0.766871	0.0252969	1	0.889971		359	0.776003	0.962264	0.00092033	1	0.762645		68
360	0.105345	0.794521	0.07636	1	0.908655		50	0.0135064	0.136752	0.62783	2	0.748066		130	0.154498	0.444444	0.115522	2	0.7258		51	0.0319352	0.239766	0.23165	3	0.757884		360	0.0962231	0.734733	0.246565	1	0.893164		360	0.142586	0.766871	0.024682	1	0.889971		360	0.789939	0.962264	0.000840102	1	0.762645		69
361	0.105345	0.796477	0.0763506	1	0.908655		51	0.0135064	0.141026	0.627463	2	0.748066		131	0.155305	0.444444	0.115243	2	0.7258		52	0.0343184	0.239766	0.226321	3	0.757884		361	0.0998221	0.734733	0.24112	1	0.893164		361	0.142586	0.768916	0.0246741	1	0.889971		361	0.790109	0.962264	0.000838316	1	0.762645		70
362	0.105862	0.796477	0.0759651	1	0.908655		52	0.0150851	0.141026	0.594107	2	0.748066		132	0.155708	0.444444	0.114884	2	0.7258		53	0.0343184	0.245614	0.225522	3	0.757884		362	0.0998221	0.736641	0.241093	1	0.893164		362	0.143823	0.768916	0.0245434	1	0.889971		362	0.823165	0.962264	0.00065955	1	0.762645		71
363	0.105862	0.798434	0.075954	1	0.908655		53	0.0150851	0.145299	0.590497	2	0.748066		133	0.178903	0.444444	0.107905	2	0.7258		54	0.0357483	0.245614	0.220721	3	0.757884		363	0.101808	0.736641	0.23947	1	0.893164		363	0.143823	0.770961	0.0245371	1	0.889971		363	0.823334	0.962264	0.000659322	1	0.762645		72
364	0.109483	0.798434	0.0743417	1	0.908655		54	0.0157867	0.145299	0.582049	2	0.748066		134	0.178903	0.45	0.107881	2	0.7258		55	0.0357483	0.251462	0.220686	3	0.757884		364	0.101808	0.73855	0.239402	1	0.893164		364	0.145966	0.770961	0.0243552	1	0.889971		364	0.855116	0.962264	0.00050326	1	0.762645		73
365	0.109483	0.800391	0.0743333	1	0.908655		55	0.0157867	0.149573	0.579161	2	0.748066		135	0.179306	0.45	0.107694	2	0.7258		56	0.0386082	0.251462	0.215369	3	0.757884		365	0.103628	0.73855	0.236998	1	0.893164		365	0.14613	0.770961	0.0243393	1	0.889971		365	0.855286	0.962264	0.000503217	1	0.762645		74
366	0.111724	0.800391	0.0722553	1	0.908655		56	0.0159621	0.149573	0.57877	2	0.748066		136	0.179306	0.461111	0.10759	2	0.7258		57	0.0386082	0.25731	0.214917	3	0.757884		366	0.103628	0.740458	0.236992	1	0.893164		366	0.147861	0.770961	0.0240992	1	0.889971		366	0.857155	0.962264	0.000494054	1	0.762645		75
367	0.111724	0.802348	0.0721753	1	0.908655		57	0.0159621	0.153846	0.575305	2	0.748066		137	0.181727	0.461111	0.10689	2	0.7258		58	0.0409914	0.25731	0.213349	3	0.757884		367	0.107641	0.740458	0.231819	1	0.893164		367	0.148026	0.770961	0.0240983	1	0.889971		367	0.857155	0.971698	0.000493961	1	0.762645		76
368	0.112241	0.802348	0.0716567	1	0.908655		58	0.0166637	0.153846	0.556527	2	0.748066		138	0.181727	0.466667	0.106881	2	0.7258		59	0.0409914	0.263158	0.212357	3	0.757884		368	0.107641	0.744275	0.231713	1	0.893164		368	0.15124	0.770961	0.0236796	1	0.889971		368	0.876275	0.971698	0.000418961	1	0.762645		77
369	0.112586	0.802348	0.0713027	1	0.908655		59	0.0166637	0.15812	0.55036	2	0.748066		139	0.18334	0.466667	0.106458	2	0.7258		60	0.0471878	0.263158	0.205302	3	0.757884		369	0.107848	0.744275	0.23152	1	0.893164		369	0.15124	0.773006	0.0236479	1	0.889971		369	0.876445	0.971698	0.000418856	1	0.762645		78
370	0.113448	0.802348	0.0707744	1	0.908655		60	0.0175408	0.15812	0.522841	2	0.748066		140	0.18334	0.472222	0.106453	2	0.7258		61	0.0471878	0.269006	0.204468	3	0.757884		370	0.107848	0.746183	0.231516	1	0.893164		370	0.151982	0.773006	0.0236117	1	0.889971		370	0.893525	0.971698	0.000344346	1	0.762645		79
371	0.113793	0.802348	0.0706129	1	0.908655		61	0.0175408	0.162393	0.522652	2	0.748066		141	0.184147	0.472222	0.10633	2	0.7258		62	0.0519542	0.269006	0.200209	3	0.757884		371	0.114715	0.746183	0.224307	1	0.893164		371	0.151982	0.775051	0.0236042	1	0.889971		371	0.893525	0.981132	0.000343864	1	0.762645		80
372	0.116552	0.802348	0.0687132	1	0.908655		62	0.0226276	0.162393	0.415162	2	0.748066		142	0.184147	0.477778	0.106295	2	0.7258		63	0.0519542	0.274854	0.199743	3	0.757884		372	0.114715	0.748092	0.224304	1	0.893164		372	0.158988	0.775051	0.0226754	1	0.889971		372	0.901258	0.981132	0.000314397	1	0.762645		81
373	0.116897	0.802348	0.0686096	1	0.908655		63	0.0226276	0.166667	0.414719	2	0.748066		143	0.184752	0.477778	0.106195	2	0.7258		64	0.0567207	0.274854	0.194859	3	0.757884		373	0.122451	0.748092	0.215825	1	0.893164		373	0.158988	0.779141	0.0226701	1	0.889971		373	0.901258	0.990566	0.000314263	1	0.762645		82
374	0.119138	0.802348	0.0672535	1	0.908655		64	0.0238555	0.166667	0.399112	2	0.748066		144	0.185559	0.477778	0.106081	2	0.7258		65	0.0567207	0.280702	0.194479	3	0.757884		374	0.122451	0.75	0.215811	1	0.893164		374	0.16212	0.779141	0.0222536	1	0.889971		374	0.92794	0.990566	0.000222957	1	0.762645		83
375	0.119138	0.804305	0.0671037	1	0.908655		65	0.0242063	0.166667	0.398487	2	0.748066		145	0.195038	0.477778	0.103078	2	0.7258		66	0.0586273	0.280702	0.193585	3	0.757884		375	0.130352	0.75	0.207621	1	0.893164		375	0.162285	0.779141	0.0222536	1	0.889971		375	0.92811	0.990566	0.000222805	1	0.762645		84
376	0.119655	0.804305	0.0667884	1	0.908655		66	0.0242063	0.17094	0.396562	2	0.748066		146	0.195038	0.483333	0.103059	2	0.7258		67	0.0586273	0.28655	0.19319	3	0.757884		376	0.130352	0.751908	0.207568	1	0.893164		376	0.16451	0.779141	0.0219667	1	0.889971		376	0.952498	0.990566	0.000150569	1	0.762645		85
377	0.119655	0.806262	0.0667236	1	0.908655		67	0.0256095	0.17094	0.382035	2	0.748066		147	0.199879	0.483333	0.101731	2	0.7258		68	0.0619638	0.28655	0.191539	3	0.757884		377	0.132669	0.751908	0.205331	1	0.893164		377	0.164675	0.779141	0.0219516	1	0.889971		377	0.952498	1	0.000150416	1	0.762645		86
378	0.125517	0.806262	0.0626479	1	0.908655		68	0.0256095	0.175214	0.380868	2	0.748066		148	0.199879	0.488889	0.101664	2	0.7258		69	0.0619638	0.292398	0.19149	3	0.757884		378	0.132669	0.753817	0.205327	1	0.893164		378	0.165169	0.779141	0.0219012	1	0.889971		378	0.953093	1	0.000148932	1	0.762645		87
379	0.166034	0.825832	0.0625	1	0.908655		69	0.0259604	0.175214	0.375301	2	0.748066		149	0.203308	0.488889	0.100089	2	0.7258		70	0.0662536	0.292398	0.188405	3	0.757884		379	0.132751	0.753817	0.205316	1	0.893164		379	0.165169	0.781186	0.0218942	1	0.889971		379	0.953263	1	0.000148536	1	0.762645		88
380	0.171552	0.825832	0.0619223	1	0.908655		70	0.0259604	0.183761	0.37522	2	0.748066		150	0.203308	0.494444	0.100046	2	0.7258		71	0.0662536	0.298246	0.188005	3	0.757884		380	0.132751	0.755725	0.205193	1	0.893164		380	0.165911	0.781186	0.0218223	1	0.889971		380	0.965075	1	0.00011196	1	0.762645		89
381	0.171552	0.827789	0.0619218	1	0.908655		71	0.026662	0.183761	0.370544	2	0.748066		151	0.204316	0.494444	0.0989789	2	0.7258		72	0.0667302	0.298246	0.187997	3	0.757884		381	0.133289	0.755725	0.204734	1	0.893164		381	0.165911	0.783231	0.0218151	1	0.889971		381	0.965245	1	0.000111451	1	0.762645		90
382	0.172241	0.827789	0.0618567	1	0.908655		72	0.0270128	0.183761	0.370276	2	0.748066		152	0.204316	0.5	0.0989	2	0.7258		73	0.137274	0.426901	0.1875	3	0.757884		382	0.133289	0.757634	0.204671	1	0.893164		382	0.168219	0.783231	0.0215525	1	0.889971		382	0.966604	1	0.000108289	1	0.762645		91
383	0.172241	0.829746	0.0618402	1	0.908655		73	0.0299947	0.183761	0.331949	2	0.748066		153	0.216821	0.5	0.0942935	2	0.7258		74	0.138227	0.426901	0.187435	3	0.757884		383	0.139329	0.757634	0.198704	1	0.893164		383	0.168219	0.785276	0.0215482	1	0.889971		383	0.966774	1	0.000108104	1	0.762645		92
384	0.173276	0.829746	0.0617315	1	0.908655		74	0.0299947	0.188034	0.327059	2	0.748066		154	0.216821	0.505556	0.0942584	2	0.7258		75	0.138227	0.432749	0.187271	3	0.757884		384	0.139329	0.759542	0.198665	1	0.893164		384	0.168466	0.785276	0.0215374	1	0.889971		384	0.978586	1	7.04717e-05	1	0.762645		93
385	0.173276	0.831703	0.0617233	1	0.908655		75	0.030521	0.188034	0.322823	2	0.748066		155	0.224889	0.505556	0.0919014	2	0.7258		76	0.144423	0.432749	0.186341	3	0.757884		385	0.144417	0.759542	0.193521	1	0.893164		385	0.168466	0.787321	0.021536	1	0.889971		385	0.978756	1	6.98714e-05	1	0.762645		94
386	0.173793	0.831703	0.0616678	1	0.908655		76	0.030521	0.192308	0.319502	2	0.748066		156	0.224889	0.511111	0.0918625	2	0.7258		77	0.144423	0.444444	0.185995	3	0.757884		386	0.144417	0.76145	0.193424	1	0.893164		386	0.168713	0.787321	0.0215159	1	0.889971		386	1	1	1.05422e-07	1	0.762645		95
387	0.173793	0.833659	0.0616631	1	0.908655		77	0.0306964	0.192308	0.316196	2	0.748066		157	0.225091	0.511111	0.0917694	2	0.7258		78	0.145377	0.444444	0.185802	3	0.757884		387	0.146444	0.76145	0.19207	1	0.893164		387	0.168713	0.791411	0.0215143	1	0.889971		0	0	0	1.9939	2	0.75364		96
388	0.176552	0.833659	0.0613973	1	0.908655		78	0.0306964	0.196581	0.313048	2	0.748066		158	0.225091	0.516667	0.091716	2	0.7258		79	0.145377	0.450292	0.185765	3	0.757884		388	0.146444	0.763359	0.192055	1	0.893164		388	0.171351	0.791411	0.0211412	1	0.889971		1	0	0.00497512	0.993902	2	0.75364		97
389	0.176552	0.835616	0.0613922	1	0.908655		79	0.0324504	0.196581	0.301113	2	0.748066		159	0.226099	0.516667	0.0913572	2	0.7258		80	0.14633	0.450292	0.185631	3	0.757884		389	0.149092	0.763359	0.189598	1	0.893164		389	0.171351	0.793456	0.021135	1	0.889971		2	8.64454e-05	0.00497512	0.985369	2	0.75364		98
390	0.179828	0.835616	0.0609589	1	0.908655		80	0.0324504	0.205128	0.301007	2	0.748066		160	0.226099	0.522222	0.0912749	2	0.7258		81	0.14633	0.461988	0.185326	3	0.757884		390	0.149092	0.765267	0.189566	1	0.893164		390	0.174071	0.793456	0.0208641	1	0.889971		3	8.64454e-05	0.0149254	0.979219	2	0.75364		99
391	0.179828	0.837573	0.060946	1	0.908655		81	0.0357832	0.205128	0.278729	2	0.748066		161	0.226301	0.522222	0.091273	2	0.7258		82	0.147283	0.461988	0.18519	3	0.757884		391	0.149961	0.765267	0.188907	1	0.893164		391	0.174071	0.795501	0.0208637	1	0.889971		4	0.000518672	0.0149254	0.856324	2	0.75364		100
392	0.181207	0.837573	0.0607538	1	0.908655		82	0.0357832	0.209402	0.27797	2	0.748066		162	0.226301	0.527778	0.0911734	2	0.7258		83	0.147283	0.467836	0.18517	3	0.757884		392	0.149961	0.767176	0.188859	1	0.893164		392	0.178521	0.795501	0.0203452	1	0.889971		5	0.000691563	0.0149254	0.853001	2	0.75364		101
393	0.181207	0.83953	0.0607206	1	0.908655		83	0.0368356	0.209402	0.272176	2	0.748066		163	0.228318	0.527778	0.0903621	2	0.7258		84	0.151096	0.467836	0.184358	3	0.757884		393	0.151822	0.767176	0.187343	1	0.893164		393	0.178521	0.797546	0.0203386	1	0.889971		6	0.000778008	0.0149254	0.838444	2	0.75364		102
394	0.186897	0.83953	0.0601838	1	0.908655		84	0.0368356	0.213675	0.271062	2	0.748066		164	0.228318	0.533333	0.0903461	2	0.7258		85	0.151096	0.479532	0.18427	3	0.757884		394	0.151822	0.769084	0.187252	1	0.893164		394	0.18017	0.797546	0.0201587	1	0.889971		7	0.000950899	0.0149254	0.816291	2	0.75364		103
395	0.186897	0.841487	0.0600969	1	0.908655		85	0.0377127	0.213675	0.267574	2	0.748066		165	0.229931	0.533333	0.0899585	2	0.7258		86	0.155863	0.479532	0.18324	3	0.757884		395	0.153436	0.769084	0.185649	1	0.893164		395	0.180335	0.797546	0.0201561	1	0.889971		8	0.00155602	0.0149254	0.757567	2	0.75364		104
396	0.188621	0.841487	0.0598807	1	0.908655		86	0.0377127	0.217949	0.266825	2	0.748066		166	0.229931	0.538889	0.0898224	2	0.7258		87	0.155863	0.48538	0.183196	3	0.757884		396	0.153436	0.770992	0.185605	1	0.893164		396	0.180829	0.797546	0.0201107	1	0.889971		9	0.00172891	0.0149254	0.756646	2	0.75364		105
397	0.188621	0.843444	0.0598572	1	0.908655		87	0.0380635	0.217949	0.266408	2	0.748066		167	0.235982	0.538889	0.0877399	2	0.7258		88	0.157293	0.48538	0.182877	3	0.757884		397	0.1596	0.770992	0.180189	1	0.893164		397	0.180829	0.799591	0.0200953	1	0.889971		10	0.00216113	0.0149254	0.679921	2	0.75364		106
398	0.192241	0.843444	0.0593001	1	0.908655		88	0.0384143	0.217949	0.266184	2	0.748066		168	0.235982	0.544444	0.0876364	2	0.7258		89	0.157293	0.491228	0.182838	3	0.757884		398	0.1596	0.772901	0.180091	1	0.893164		398	0.181983	0.799591	0.0199823	1	0.889971		11	0.00216113	0.0199005	0.674086	2	0.75364		107
399	0.192241	0.845401	0.0592928	1	0.908655		89	0.0389405	0.217949	0.261861	2	0.748066		169	0.236184	0.544444	0.0875329	2	0.7258		90	0.159676	0.491228	0.182261	3	0.757884		399	0.159682	0.772901	0.180057	1	0.893164		399	0.181983	0.801636	0.0199772	1	0.889971		12	0.00233402	0.0199005	0.654884	2	0.75364		108
400	0.197931	0.845401	0.0584455	1	0.908655		90	0.0389405	0.230769	0.260932	2	0.748066		170	0.236184	0.55	0.0874294	2	0.7258		91	0.159676	0.497076	0.182162	3	0.757884		400	0.159682	0.774809	0.179997	1	0.893164		400	0.184785	0.801636	0.0196991	1	0.889971		13	0.00250692	0.0199005	0.651483	2	0.75364		109
401	0.197931	0.847358	0.0584052	1	0.908655		91	0.0394668	0.230769	0.256157	2	0.748066		171	0.237797	0.55	0.0869574	2	0.7258		92	0.162059	0.497076	0.181907	3	0.757884		401	0.161213	0.774809	0.178684	1	0.893164		401	0.184785	0.805726	0.0196885	1	0.889971		14	0.00250692	0.0248756	0.643527	2	0.75364		110
402	0.19931	0.847358	0.0582484	1	0.908655		92	0.0394668	0.235043	0.255317	2	0.748066		172	0.237797	0.555556	0.0869264	2	0.7258		93	0.162059	0.502924	0.18176	3	0.757884		402	0.161213	0.776718	0.178614	1	0.893164		402	0.186516	0.805726	0.0195824	1	0.889971		15	0.0028527	0.0248756	0.562834	2	0.75364		111
403	0.19931	0.849315	0.0582321	1	0.908655		93	0.0445536	0.235043	0.228706	2	0.748066		173	0.243445	0.555556	0.0855658	2	0.7258		94	0.166826	0.502924	0.181236	3	0.757884		403	0.165226	0.776718	0.175549	1	0.893164		403	0.186516	0.807771	0.0195777	1	0.889971		16	0.0028527	0.0298507	0.549663	2	0.75364		112
404	0.202241	0.849315	0.0577634	1	0.908655		94	0.0445536	0.239316	0.2284	2	0.748066		174	0.243445	0.561111	0.0855079	2	0.7258		95	0.166826	0.508772	0.181225	3	0.757884		404	0.165226	0.778626	0.175535	1	0.893164		404	0.18734	0.807771	0.0195043	1	0.889971		17	0.00319848	0.0298507	0.51039	2	0.75364		113
405	0.202241	0.851272	0.0577612	1	0.908655		95	0.0452552	0.239316	0.223241	2	0.748066		175	0.252118	0.561111	0.0835763	2	0.7258		96	0.171115	0.508772	0.18022	3	0.757884		405	0.165929	0.778626	0.174987	1	0.893164		405	0.18734	0.809816	0.0194898	1	0.889971		18	0.00319848	0.0348259	0.457609	2	0.75364		114
406	0.206034	0.851272	0.0570831	1	0.908655		96	0.0459568	0.239316	0.221349	2	0.748066		176	0.252118	0.566667	0.0834822	2	0.7258		97	0.172069	0.508772	0.180184	3	0.757884		406	0.165929	0.780534	0.174978	1	0.893164		406	0.188329	0.809816	0.0193737	1	0.889971		19	0.00674274	0.0348259	0.231082	2	0.75364		115
407	0.206034	0.853229	0.0570793	1	0.908655		97	0.0463077	0.239316	0.220848	2	0.748066		177	0.258774	0.566667	0.0818547	2	0.7258		98	0.173022	0.508772	0.180036	3	0.757884		407	0.166674	0.780534	0.174508	1	0.893164		407	0.188329	0.813906	0.0193726	1	0.889971		20	0.00691563	0.0348259	0.230374	2	0.75364		116
408	0.214655	0.853229	0.055819	1	0.908655		98	0.0466585	0.239316	0.219936	2	0.748066		178	0.259177	0.566667	0.0817807	2	0.7258		99	0.173022	0.51462	0.17968	3	0.757884		408	0.166674	0.782443	0.174484	1	0.893164		408	0.189566	0.813906	0.019178	1	0.889971		21	0.00734786	0.0348259	0.216851	2	0.75364		117
409	0.215	0.853229	0.0558186	1	0.908655		99	0.0475355	0.239316	0.218664	2	0.748066		179	0.26543	0.566667	0.0804668	2	0.7258		100	0.180172	0.51462	0.178208	3	0.757884		409	0.167087	0.782443	0.174107	1	0.893164		409	0.189566	0.815951	0.0191705	1	0.889971		22	0.00734786	0.039801	0.215755	2	0.75364		118
410	0.218103	0.853229	0.0552748	1	0.908655		100	0.0475355	0.24359	0.218454	2	0.748066		180	0.26543	0.572222	0.080391	2	0.7258		101	0.180172	0.520468	0.178167	3	0.757884		410	0.167087	0.784351	0.174099	1	0.893164		410	0.190225	0.815951	0.019029	1	0.889971		23	0.00752075	0.039801	0.211062	2	0.75364		119
411	0.218448	0.853229	0.0552416	1	0.908655		101	0.0477109	0.24359	0.217279	2	0.748066		181	0.268052	0.572222	0.0798432	2	0.7258		102	0.181125	0.520468	0.177905	3	0.757884		411	0.169156	0.784351	0.172312	1	0.893164		411	0.190225	0.817996	0.0190184	1	0.889971		24	0.00855809	0.039801	0.180779	2	0.75364		120
412	0.223448	0.853229	0.0543756	1	0.908655		102	0.0477109	0.247863	0.216714	2	0.748066		182	0.268052	0.577778	0.079817	2	0.7258		103	0.181125	0.532164	0.177688	3	0.757884		412	0.169156	0.78626	0.172196	1	0.893164		412	0.191214	0.817996	0.0188943	1	0.889971		25	0.00855809	0.0447761	0.178954	2	0.75364		121
413	0.223448	0.855186	0.0543568	1	0.908655		103	0.048588	0.247863	0.214878	2	0.748066		183	0.275918	0.577778	0.0783998	2	0.7258		104	0.186368	0.532164	0.176576	3	0.757884		413	0.170935	0.78626	0.170887	1	0.893164		413	0.191379	0.817996	0.0188773	1	0.889971		26	0.00985477	0.0447761	0.160139	2	0.75364		122
414	0.225517	0.855186	0.0539527	1	0.908655		104	0.048588	0.252137	0.214267	2	0.748066		184	0.275918	0.583333	0.0783344	2	0.7258		105	0.186368	0.538012	0.17657	3	0.757884		414	0.170935	0.788168	0.170866	1	0.893164		414	0.192038	0.817996	0.0188243	1	0.889971		27	0.0100277	0.0447761	0.159503	2	0.75364		123
415	0.225517	0.857143	0.0539407	1	0.908655		105	0.0487634	0.252137	0.214254	2	0.748066		185	0.276321	0.583333	0.0781246	2	0.7258		106	0.189704	0.538012	0.175995	3	0.757884		415	0.17776	0.788168	0.165891	1	0.893164		415	0.192203	0.817996	0.018818	1	0.889971		28	0.0104599	0.0447761	0.156415	2	0.75364		124
416	0.226034	0.857143	0.0538555	1	0.908655		106	0.0487634	0.25641	0.213295	2	0.748066		186	0.276321	0.588889	0.0780079	2	0.7258		107	0.189704	0.54386	0.175802	3	0.757884		416	0.17776	0.790076	0.165875	1	0.893164		416	0.192368	0.817996	0.0188106	1	0.889971		29	0.0104599	0.0497512	0.156335	2	0.75364		125
417	0.226379	0.857143	0.0538499	1	0.908655		107	0.0491142	0.25641	0.212597	2	0.748066		187	0.278136	0.588889	0.0772475	2	0.7258		108	0.193518	0.54386	0.17496	3	0.757884		417	0.178877	0.790076	0.16518	1	0.893164		417	0.192368	0.820041	0.0188033	1	0.889971		30	0.0119295	0.0497512	0.132182	2	0.75364		126
418	0.226724	0.857143	0.0537951	1	0.908655		108	0.0543764	0.25641	0.198318	2	0.748066		188	0.278136	0.594444	0.0771995	2	0.7258		109	0.193518	0.549708	0.174935	3	0.757884		418	0.178877	0.791985	0.16517	1	0.893164		418	0.192533	0.820041	0.0187945	1	0.889971		31	0.0121024	0.0497512	0.131324	2	0.75364		127
419	0.226724	0.8591	0.0537948	1	0.908655		109	0.0543764	0.260684	0.198017	2	0.748066		189	0.27975	0.594444	0.0767605	2	0.7258		110	0.201621	0.549708	0.171796	3	0.757884		419	0.181732	0.791985	0.16276	1	0.893164		419	0.192698	0.820041	0.018773	1	0.889971		32	0.0125346	0.0497512	0.128412	2	0.75364		128
420	0.231207	0.8591	0.0531583	1	0.908655		110	0.057183	0.260684	0.191398	2	0.748066		190	0.27975	0.6	0.0767505	2	0.7258		111	0.201621	0.555556	0.171793	3	0.757884		420	0.181732	0.793893	0.162703	1	0.893164		420	0.194841	0.820041	0.0185364	1	0.889971		33	0.0125346	0.0547264	0.128176	2	0.75364		129
421	0.231207	0.861057	0.0531476	1	0.908655		111	0.057183	0.264957	0.191074	2	0.748066		191	0.285599	0.6	0.0751122	2	0.7258		112	0.20448	0.555556	0.17142	3	0.757884		421	0.187813	0.793893	0.158468	1	0.893164		421	0.194841	0.824131	0.0185315	1	0.889971		34	0.0127939	0.0547264	0.125016	2	0.75364		130
422	0.231724	0.861057	0.0531209	1	0.908655		112	0.0575338	0.264957	0.19028	2	0.748066		192	0.285599	0.605556	0.0750807	2	0.7258		113	0.20448	0.561404	0.17132	3	0.757884		422	0.187813	0.795802	0.158451	1	0.893164		422	0.194923	0.824131	0.0185165	1	0.889971		35	0.0154737	0.0895522	0.125	2	0.75364		131
423	0.232069	0.861057	0.0530741	1	0.908655		113	0.0575338	0.273504	0.188139	2	0.748066		193	0.287414	0.605556	0.0746926	2	0.7258		114	0.219256	0.561404	0.167356	3	0.757884		423	0.189013	0.795802	0.157802	1	0.893164		423	0.194923	0.826176	0.0185009	1	0.889971		36	0.0154737	0.0945274	0.124689	2	0.75364		132
424	0.234828	0.861057	0.0524502	1	0.908655		114	0.0585862	0.273504	0.183889	2	0.748066		194	0.287414	0.611111	0.0746025	2	0.7258		115	0.219256	0.567251	0.167291	3	0.757884		424	0.189013	0.79771	0.1578	1	0.893164		424	0.197478	0.826176	0.0182249	1	0.889971		37	0.0159924	0.0945274	0.123663	2	0.75364		133
425	0.234828	0.863014	0.0524408	1	0.908655		115	0.0585862	0.277778	0.183829	2	0.748066		195	0.288624	0.611111	0.0743779	2	0.7258		116	0.224023	0.567251	0.165824	3	0.757884		425	0.190212	0.79771	0.156413	1	0.893164		425	0.197478	0.828221	0.0182148	1	0.889971		38	0.0159924	0.0995025	0.123389	2	0.75364		134
426	0.24	0.863014	0.0516266	1	0.908655		116	0.0592878	0.277778	0.182482	2	0.748066		196	0.288624	0.616667	0.0743649	2	0.7258		117	0.224023	0.578947	0.165229	3	0.757884		426	0.190212	0.799618	0.156401	1	0.893164		426	0.209841	0.828221	0.0170502	1	0.889971		39	0.0170297	0.0995025	0.120868	2	0.75364		135
427	0.24	0.864971	0.0516177	1	0.908655		117	0.0592878	0.282051	0.181742	2	0.748066		197	0.291045	0.616667	0.0739222	2	0.7258		118	0.229743	0.578947	0.163451	3	0.757884		427	0.190254	0.799618	0.156389	1	0.893164		427	0.209841	0.830266	0.0170424	1	0.889971		40	0.0172026	0.0995025	0.120587	2	0.75364		136
428	0.24069	0.864971	0.0515392	1	0.908655		118	0.0645501	0.282051	0.166069	2	0.748066		198	0.291045	0.622222	0.0738941	2	0.7258		119	0.229743	0.584795	0.16307	3	0.757884		428	0.190254	0.801527	0.156368	1	0.893164		428	0.212478	0.830266	0.0167966	1	0.889971		41	0.0204876	0.0995025	0.11373	2	0.75364		137
429	0.24069	0.866928	0.0515296	1	0.908655		119	0.0649009	0.282051	0.166026	2	0.748066		199	0.295079	0.622222	0.0728917	2	0.7258		120	0.234986	0.584795	0.161981	3	0.757884		429	0.19104	0.801527	0.155767	1	0.893164		429	0.212478	0.832311	0.0167914	1	0.889971		42	0.0204876	0.109453	0.113645	2	0.75364		138
430	0.242586	0.866928	0.0511487	1	0.908655		120	0.0719172	0.282051	0.151774	2	0.748066		200	0.295079	0.627778	0.0728851	2	0.7258		121	0.234986	0.596491	0.161701	3	0.757884		430	0.19104	0.803435	0.155741	1	0.893164		430	0.216105	0.832311	0.0164743	1	0.889971		43	0.0240318	0.109453	0.109456	2	0.75364		139
431	0.242586	0.868885	0.0511357	1	0.908655		121	0.0719172	0.290598	0.151528	2	0.748066		201	0.300726	0.627778	0.0712306	2	0.7258		122	0.235462	0.596491	0.161694	3	0.757884		431	0.193273	0.803435	0.154305	1	0.893164		431	0.216105	0.834356	0.0164713	1	0.889971		44	0.0240318	0.114428	0.10938	2	0.75364		140
432	0.244828	0.868885	0.0508656	1	0.908655		122	0.0738467	0.290598	0.149787	2	0.748066		202	0.300726	0.633333	0.0711044	2	0.7258		123	0.235462	0.602339	0.161385	3	0.757884		432	0.193273	0.805344	0.154297	1	0.893164		432	0.225583	0.834356	0.0156636	1	0.889971		45	0.0253285	0.114428	0.108076	2	0.75364		141
433	0.244828	0.870841	0.0508321	1	0.908655		123	0.0738467	0.294872	0.149564	2	0.748066		203	0.306979	0.633333	0.0694179	2	0.7258		124	0.238799	0.602339	0.160335	3	0.757884		433	0.196459	0.805344	0.151994	1	0.893164		433	0.225583	0.836401	0.0156585	1	0.889971		46	0.0255014	0.114428	0.108048	2	0.75364		142
434	0.247931	0.870841	0.0502189	1	0.908655		124	0.0778811	0.294872	0.144171	2	0.748066		204	0.306979	0.638889	0.0693492	2	0.7258		125	0.238799	0.608187	0.160322	3	0.757884		434	0.196459	0.807252	0.151933	1	0.893164		434	0.226407	0.836401	0.01556	1	0.889971		47	0.0257607	0.114428	0.10786	2	0.75364		143
435	0.247931	0.872798	0.0502165	1	0.908655		125	0.0782319	0.294872	0.144095	2	0.748066		205	0.313635	0.638889	0.0679273	2	0.7258		126	0.242612	0.608187	0.159732	3	0.757884		435	0.197286	0.807252	0.151362	1	0.893164		435	0.226572	0.836401	0.0155536	1	0.889971		48	0.0257607	0.119403	0.107783	2	0.75364		144
436	0.249655	0.872798	0.0499671	1	0.908655		126	0.0792843	0.294872	0.143374	2	0.748066		206	0.313635	0.644444	0.0678477	2	0.7258		127	0.242612	0.614035	0.15968	3	0.757884		436	0.197286	0.80916	0.151291	1	0.893164		436	0.226819	0.836401	0.0155513	1	0.889971		49	0.0263658	0.119403	0.106467	2	0.75364		145
437	0.249655	0.874755	0.0499286	1	0.908655		127	0.0792843	0.299145	0.143273	2	0.748066		207	0.317668	0.644444	0.0666589	2	0.7258		128	0.243565	0.614035	0.159475	3	0.757884		437	0.201919	0.80916	0.147999	1	0.893164		437	0.226819	0.838446	0.0155501	1	0.889971		50	0.0263658	0.124378	0.106407	2	0.75364		146
438	0.25069	0.874755	0.0495581	1	0.908655		128	0.084722	0.299145	0.136939	2	0.748066		208	0.317668	0.65	0.0666395	2	0.7258		129	0.243565	0.619883	0.159443	3	0.757884		438	0.201919	0.811069	0.147897	1	0.893164		438	0.232671	0.838446	0.0150506	1	0.889971		51	0.0268845	0.124378	0.105085	2	0.75364		147
439	0.251034	0.874755	0.0495385	1	0.908655		129	0.084722	0.303419	0.13679	2	0.748066		209	0.328762	0.65	0.063951	2	0.7258		130	0.255481	0.619883	0.155256	3	0.757884		439	0.203864	0.811069	0.146788	1	0.893164		439	0.232836	0.838446	0.0150347	1	0.889971		52	0.0268845	0.129353	0.104852	2	0.75364		148
440	0.251379	0.874755	0.0494894	1	0.908655		130	0.0873531	0.303419	0.133932	2	0.748066		210	0.328762	0.655556	0.0639479	2	0.7258		131	0.255481	0.625731	0.15519	3	0.757884		440	0.203864	0.812977	0.14677	1	0.893164		440	0.236463	0.838446	0.0147603	1	0.889971		53	0.026971	0.129353	0.104569	2	0.75364		149
441	0.251379	0.876712	0.04945	1	0.908655		131	0.0873531	0.307692	0.133794	2	0.748066		211	0.333199	0.655556	0.062633	2	0.7258		132	0.257388	0.625731	0.154554	3	0.757884		441	0.210979	0.812977	0.142074	1	0.893164		441	0.236627	0.838446	0.0147587	1	0.889971		54	0.026971	0.134328	0.104559	2	0.75364		150
442	0.256897	0.876712	0.0484111	1	0.908655		132	0.0875285	0.307692	0.133782	2	0.748066		212	0.333199	0.661111	0.0625734	2	0.7258		133	0.257388	0.631579	0.154404	3	0.757884		442	0.210979	0.814885	0.142039	1	0.893164		442	0.237534	0.838446	0.0146908	1	0.889971		55	0.0271438	0.134328	0.104384	2	0.75364		151
443	0.256897	0.878669	0.0483916	1	0.908655		133	0.0875285	0.311966	0.133149	2	0.748066		213	0.334812	0.661111	0.0620234	2	0.7258		134	0.261678	0.631579	0.153613	3	0.757884		443	0.2116	0.814885	0.141551	1	0.893164		443	0.237534	0.840491	0.0146825	1	0.889971		56	0.0271438	0.139303	0.104363	2	0.75364		152
444	0.257241	0.878669	0.0482927	1	0.908655		134	0.0896334	0.311966	0.131167	2	0.748066		214	0.334812	0.666667	0.0620166	2	0.7258		135	0.261678	0.637427	0.153407	3	0.757884		444	0.2116	0.816794	0.141489	1	0.893164		444	0.238935	0.840491	0.0145296	1	0.889971		57	0.0272303	0.139303	0.104345	2	0.75364		153
445	0.257241	0.882583	0.0482818	1	0.908655		135	0.0896334	0.316239	0.131128	2	0.748066		215	0.336023	0.666667	0.0616564	2	0.7258		136	0.263584	0.637427	0.152885	3	0.757884		445	0.219584	0.816794	0.136247	1	0.893164		445	0.238935	0.842536	0.0145123	1	0.889971		58	0.0274032	0.139303	0.103834	2	0.75364		154
446	0.258103	0.882583	0.0481637	1	0.908655		136	0.0912121	0.316239	0.129361	2	0.748066		216	0.336426	0.666667	0.0616545	2	0.7258		137	0.263584	0.643275	0.152881	3	0.757884		446	0.219584	0.818702	0.136214	1	0.893164		446	0.240996	0.842536	0.0143974	1	0.889971		59	0.027749	0.139303	0.102887	2	0.75364		155
447	0.258103	0.88454	0.0481588	1	0.908655		137	0.0912121	0.320513	0.129297	2	0.748066		217	0.339048	0.666667	0.060482	2	0.7258		138	0.265491	0.643275	0.152597	3	0.757884		447	0.221859	0.818702	0.134675	1	0.893164		447	0.240996	0.844581	0.0143834	1	0.889971		60	0.0279219	0.139303	0.102832	2	0.75364		156
448	0.276034	0.88454	0.0453797	1	0.908655		138	0.093317	0.320513	0.127068	2	0.748066		218	0.339048	0.672222	0.0604708	2	0.7258		139	0.265491	0.649123	0.152496	3	0.757884		448	0.221859	0.820611	0.134647	1	0.893164		448	0.241408	0.844581	0.0143682	1	0.889971		61	0.0279219	0.144279	0.102749	2	0.75364		157
449	0.276379	0.88454	0.0453772	1	0.908655		139	0.093317	0.324786	0.12652	2	0.748066		219	0.339855	0.672222	0.0601949	2	0.7258		140	0.267398	0.649123	0.151843	3	0.757884		449	0.222521	0.820611	0.134003	1	0.893164		449	0.241408	0.846626	0.0143384	1	0.889971		62	0.0281812	0.144279	0.102149	2	0.75364		158
450	0.277414	0.88454	0.045181	1	0.908655		140	0.0947202	0.324786	0.125774	2	0.748066		220	0.339855	0.683333	0.0599957	2	0.7258		141	0.267398	0.654971	0.151639	3	0.757884		450	0.222521	0.822519	0.133994	1	0.893164		450	0.24454	0.846626	0.0141164	1	0.889971		63	0.0281812	0.154229	0.101976	2	0.75364		159
451	0.277414	0.886497	0.0451731	1	0.908655		141	0.095071	0.324786	0.125743	2	0.748066		221	0.345906	0.683333	0.0585081	2	0.7258		142	0.28265	0.654971	0.144728	3	0.757884		451	0.227072	0.822519	0.130837	1	0.893164		451	0.244705	0.846626	0.0141133	1	0.889971		64	0.0295643	0.154229	0.0995072	2	0.75364		160
452	0.285172	0.886497	0.0437664	1	0.908655		142	0.0954219	0.324786	0.125614	2	0.748066		222	0.346309	0.683333	0.0584984	2	0.7258		143	0.28265	0.660819	0.144633	3	0.757884		452	0.227072	0.824427	0.130805	1	0.893164		452	0.247754	0.846626	0.0138489	1	0.889971		65	0.0295643	0.159204	0.0994265	2	0.75364		161
453	0.285172	0.888454	0.0436867	1	0.908655		143	0.0954219	0.32906	0.125544	2	0.748066		223	0.346511	0.683333	0.0584637	2	0.7258		144	0.290753	0.660819	0.14151	3	0.757884		453	0.229471	0.824427	0.129572	1	0.893164		453	0.247754	0.848671	0.0138374	1	0.889971		66	0.0297372	0.159204	0.0990221	2	0.75364		162
454	0.292241	0.888454	0.0427649	1	0.908655		144	0.0959481	0.32906	0.12516	2	0.748066		224	0.346511	0.688889	0.0584616	2	0.7258		145	0.290753	0.666667	0.141388	3	0.757884		454	0.229471	0.826336	0.129557	1	0.893164		454	0.247919	0.848671	0.0138285	1	0.889971		67	0.0297372	0.164179	0.0989937	2	0.75364		163
455	0.292586	0.888454	0.0427591	1	0.908655		145	0.134889	0.41453	0.125	2	0.748066		225	0.348124	0.688889	0.0581413	2	0.7258		146	0.300286	0.666667	0.137852	3	0.757884		455	0.233525	0.826336	0.127071	1	0.893164		455	0.247919	0.850716	0.0138258	1	0.889971		68	0.0299965	0.164179	0.09879	2	0.75364		164
456	0.300862	0.888454	0.0416602	1	0.908655		146	0.135415	0.41453	0.124886	2	0.748066		226	0.348124	0.694444	0.0581074	2	0.7258		147	0.300286	0.672515	0.137794	3	0.757884		456	0.233525	0.828244	0.12701	1	0.893164		456	0.248496	0.850716	0.0137763	1	0.889971		69	0.0299965	0.169154	0.0987302	2	0.75364		165
457	0.301207	0.888454	0.0416551	1	0.908655		147	0.135415	0.418803	0.124847	2	0.748066		227	0.348931	0.694444	0.05792	2	0.7258		148	0.301716	0.672515	0.136605	3	0.757884		457	0.234311	0.828244	0.126584	1	0.893164		457	0.248496	0.852761	0.0137671	1	0.889971		70	0.0302559	0.169154	0.0986719	2	0.75364		166
458	0.312759	0.888454	0.0402334	1	0.908655		148	0.137169	0.418803	0.124492	2	0.748066		228	0.349334	0.694444	0.0578942	2	0.7258		149	0.301716	0.678363	0.136457	3	0.757884		458	0.234311	0.830153	0.126577	1	0.893164		458	0.251463	0.852761	0.0135307	1	0.889971		71	0.0302559	0.174129	0.0986256	2	0.75364		167
459	0.312759	0.890411	0.0401955	1	0.908655		149	0.137169	0.423077	0.124472	2	0.748066		229	0.352158	0.694444	0.0573215	2	0.7258		150	0.303146	0.678363	0.135543	3	0.757884		459	0.234559	0.830153	0.126402	1	0.893164		459	0.251463	0.854806	0.0135287	1	0.889971		72	0.0310339	0.174129	0.0979411	2	0.75364		168
460	0.322414	0.890411	0.0390399	1	0.908655		150	0.140326	0.423077	0.12385	2	0.748066		230	0.352158	0.7	0.0572658	2	0.7258		151	0.303146	0.690058	0.135416	3	0.757884		460	0.234559	0.832061	0.1264	1	0.893164		460	0.252534	0.854806	0.013461	1	0.889971		73	0.0310339	0.179104	0.0979114	2	0.75364		169
461	0.322414	0.892368	0.0390039	1	0.908655		151	0.140326	0.42735	0.123844	2	0.748066		231	0.356999	0.7	0.056398	2	0.7258		152	0.305052	0.690058	0.134884	3	0.757884		461	0.236834	0.832061	0.125057	1	0.893164		461	0.252534	0.856851	0.0134496	1	0.889971		74	0.0362206	0.179104	0.0913221	2	0.75364		170
462	0.326034	0.892368	0.0383874	1	0.908655		152	0.141028	0.42735	0.123713	2	0.748066		232	0.356999	0.705556	0.0563168	2	0.7258		153	0.305052	0.695906	0.134734	3	0.757884		462	0.236834	0.833969	0.12503	1	0.893164		462	0.255749	0.856851	0.013281	1	0.889971		75	0.0362206	0.18408	0.0912576	2	0.75364		171
463	0.326379	0.892368	0.0383808	1	0.908655		153	0.141028	0.431624	0.12368	2	0.748066		233	0.36547	0.705556	0.0545869	2	0.7258		154	0.329361	0.695906	0.126574	3	0.757884		463	0.241592	0.833969	0.122658	1	0.893164		463	0.255914	0.856851	0.0132762	1	0.889971		76	0.0364799	0.18408	0.0908943	2	0.75364		172
464	0.335517	0.892368	0.0371889	1	0.908655		154	0.141203	0.431624	0.123637	2	0.748066		234	0.36547	0.711111	0.0545346	2	0.7258		155	0.329361	0.701754	0.126506	3	0.757884		464	0.241592	0.835878	0.122657	1	0.893164		464	0.263167	0.856851	0.012806	1	0.889971		77	0.0364799	0.189055	0.09089	2	0.75364		173
465	0.335517	0.894325	0.0371825	1	0.908655		155	0.141203	0.435897	0.123551	2	0.748066		235	0.380597	0.711111	0.0514839	2	0.7258		156	0.334128	0.701754	0.125088	3	0.757884		465	0.242378	0.835878	0.122201	1	0.893164		465	0.263331	0.856851	0.0127836	1	0.889971		78	0.0382089	0.189055	0.0893498	2	0.75364		174
466	0.339138	0.894325	0.0366978	1	0.908655		156	0.14173	0.435897	0.123463	2	0.748066		236	0.380597	0.716667	0.0514718	2	0.7258		157	0.334128	0.707602	0.125027	3	0.757884		466	0.242378	0.837786	0.122195	1	0.893164		466	0.26498	0.856851	0.0126988	1	0.889971		79	0.0382089	0.19403	0.0893324	2	0.75364		175
467	0.339138	0.896282	0.0366922	1	0.908655		157	0.14173	0.440171	0.123447	2	0.748066		237	0.383421	0.716667	0.0510231	2	0.7258		158	0.340324	0.707602	0.124092	3	0.757884		467	0.243578	0.837786	0.121632	1	0.893164		467	0.265145	0.856851	0.0126934	1	0.889971		80	0.0420124	0.19403	0.0862778	2	0.75364		176
468	0.341897	0.896282	0.0364458	1	0.908655		158	0.142782	0.440171	0.123333	2	0.748066		238	0.383421	0.722222	0.0509625	2	0.7258		159	0.340324	0.71345	0.123982	3	0.757884		468	0.243578	0.839695	0.121627	1	0.893164		468	0.2677	0.856851	0.012519	1	0.889971		81	0.0420124	0.199005	0.0862258	2	0.75364		177
469	0.341897	0.898239	0.0364425	1	0.908655		159	0.142782	0.444444	0.123326	2	0.748066		239	0.384429	0.722222	0.05074	2	0.7258		160	0.351287	0.71345	0.121697	3	0.757884		469	0.248873	0.839695	0.118874	1	0.893164		469	0.2677	0.860941	0.0125052	1	0.889971		82	0.043482	0.199005	0.0856388	2	0.75364		178
470	0.347931	0.898239	0.0355842	1	0.908655		160	0.143133	0.444444	0.123247	2	0.748066		240	0.384429	0.727778	0.0506982	2	0.7258		161	0.351287	0.719298	0.121494	3	0.757884		470	0.248873	0.841603	0.118868	1	0.893164		470	0.271821	0.860941	0.0122747	1	0.889971		83	0.043482	0.20398	0.0856177	2	0.75364		179
471	0.347931	0.900196	0.0355522	1	0.908655		161	0.143133	0.448718	0.12317	2	0.748066		241	0.392699	0.727778	0.0493492	2	0.7258		162	0.36225	0.719298	0.118976	3	0.757884		471	0.250693	0.841603	0.117893	1	0.893164		471	0.271985	0.860941	0.01227	1	0.889971		84	0.0440007	0.20398	0.0853232	2	0.75364		180
472	0.363621	0.900196	0.0333305	1	0.908655		162	0.145764	0.448718	0.122905	2	0.748066		242	0.392699	0.733333	0.0493362	2	0.7258		163	0.36225	0.725146	0.118852	3	0.757884		472	0.250693	0.843511	0.117871	1	0.893164		472	0.272645	0.860941	0.0122216	1	0.889971		85	0.0440007	0.208955	0.0853128	2	0.75364		181
473	0.363621	0.902153	0.0333197	1	0.908655		163	0.145764	0.452991	0.122875	2	0.748066		243	0.395321	0.733333	0.0487663	2	0.7258		164	0.367969	0.725146	0.11772	3	0.757884		473	0.251024	0.843511	0.117767	1	0.893164		473	0.27281	0.860941	0.01222	1	0.889971		86	0.0452109	0.208955	0.0846692	2	0.75364		182
474	0.363966	0.902153	0.0333124	1	0.908655		164	0.146115	0.452991	0.122795	2	0.748066		244	0.395321	0.738889	0.0487557	2	0.7258		165	0.367969	0.730994	0.117502	3	0.757884		474	0.251024	0.84542	0.117755	1	0.893164		474	0.273057	0.860941	0.0122019	1	0.889971		87	0.0452109	0.21393	0.0845265	2	0.75364		183
475	0.363966	0.90411	0.0332995	1	0.908655		165	0.146115	0.457265	0.122784	2	0.748066		245	0.401573	0.738889	0.0476306	2	0.7258		166	0.386082	0.730994	0.112668	3	0.757884		475	0.25272	0.84542	0.116897	1	0.893164		475	0.273057	0.862986	0.0121908	1	0.889971		88	0.0460754	0.21393	0.0839391	2	0.75364		184
476	0.374138	0.90411	0.0319755	1	0.908655		166	0.146816	0.457265	0.122656	2	0.748066		246	0.401573	0.744444	0.0475549	2	0.7258		167	0.386082	0.736842	0.112621	3	0.757884		476	0.25272	0.847328	0.116875	1	0.893164		476	0.276436	0.862986	0.0119758	1	0.889971		89	0.0460754	0.218905	0.0839091	2	0.75364		185
477	0.374138	0.906067	0.031974	1	0.908655		167	0.146816	0.461538	0.122562	2	0.748066		247	0.4048	0.744444	0.0470892	2	0.7258		168	0.386559	0.736842	0.112595	3	0.757884		477	0.253216	0.847328	0.116645	1	0.893164		477	0.276601	0.862986	0.0119616	1	0.889971		90	0.049101	0.218905	0.0819049	2	0.75364		186
478	0.378448	0.906067	0.0313163	1	0.908655		168	0.149974	0.461538	0.121918	2	0.748066		248	0.4048	0.75	0.0470793	2	0.7258		169	0.386559	0.74269	0.11257	3	0.757884		478	0.253216	0.849237	0.116602	1	0.893164		478	0.277837	0.862986	0.0119021	1	0.889971		91	0.049101	0.223881	0.0819049	2	0.75364		187
479	0.378448	0.908023	0.0312867	1	0.908655		169	0.149974	0.465812	0.121892	2	0.748066		249	0.412465	0.75	0.0459908	2	0.7258		170	0.388465	0.74269	0.111829	3	0.757884		479	0.256981	0.849237	0.114398	1	0.893164		479	0.277837	0.865031	0.0118983	1	0.889971		92	0.0495332	0.223881	0.0816316	2	0.75364		188
480	0.38	0.908023	0.0310888	1	0.908655		170	0.151202	0.465812	0.121508	2	0.748066		250	0.412465	0.755556	0.0459832	2	0.7258		171	0.388465	0.748538	0.111749	3	0.757884		480	0.256981	0.853053	0.114378	1	0.893164		480	0.281381	0.865031	0.0116972	1	0.889971		93	0.0495332	0.228856	0.0816097	2	0.75364		189
481	0.380345	0.908023	0.0310854	1	0.908655		171	0.151202	0.470085	0.121441	2	0.748066		251	0.415894	0.755556	0.0454384	2	0.7258		172	0.391325	0.748538	0.111001	3	0.757884		481	0.258015	0.853053	0.113744	1	0.893164		481	0.281381	0.869121	0.0116811	1	0.889971		94	0.0522994	0.228856	0.0797201	2	0.75364		190
482	0.380862	0.908023	0.0310117	1	0.908655		172	0.151552	0.470085	0.121411	2	0.748066		252	0.415894	0.761111	0.0454294	2	0.7258		173	0.391325	0.754386	0.110841	3	0.757884		482	0.258015	0.854962	0.113656	1	0.893164		482	0.283277	0.869121	0.0115375	1	0.889971		95	0.0522994	0.233831	0.0796545	2	0.75364		191
483	0.380862	0.90998	0.0310083	1	0.908655		173	0.151552	0.474359	0.121404	2	0.748066		253	0.419927	0.761111	0.0447426	2	0.7258		174	0.392278	0.754386	0.110504	3	0.757884		483	0.267075	0.854962	0.109576	1	0.893164		483	0.283277	0.871166	0.0115349	1	0.889971		96	0.0523859	0.233831	0.0794962	2	0.75364		192
484	0.382241	0.90998	0.0308282	1	0.908655		174	0.152605	0.474359	0.12122	2	0.748066		254	0.419927	0.766667	0.0447412	2	0.7258		175	0.392278	0.760234	0.110497	3	0.757884		484	0.267075	0.85687	0.109559	1	0.893164		484	0.285502	0.871166	0.0113532	1	0.889971		97	0.0525588	0.233831	0.0794371	2	0.75364		193
485	0.382241	0.911937	0.0308195	1	0.908655		175	0.152605	0.478632	0.121173	2	0.748066		255	0.431021	0.766667	0.0425161	2	0.7258		176	0.397521	0.760234	0.108855	3	0.757884		485	0.268771	0.85687	0.108833	1	0.893164		485	0.285667	0.871166	0.0113457	1	0.889971		98	0.0563624	0.233831	0.0773363	2	0.75364		194
486	0.385517	0.911937	0.030241	1	0.908655		176	0.15699	0.478632	0.120422	2	0.748066		256	0.431424	0.766667	0.0424792	2	0.7258		177	0.397521	0.766082	0.108767	3	0.757884		486	0.268771	0.858779	0.108833	1	0.893164		486	0.287316	0.871166	0.0112395	1	0.889971		99	0.0563624	0.238806	0.0773208	2	0.75364		195
487	0.385517	0.913894	0.0302354	1	0.908655		177	0.15699	0.482906	0.120383	2	0.748066		257	0.437071	0.766667	0.0415892	2	0.7258		178	0.403241	0.766082	0.105924	3	0.757884		487	0.273901	0.858779	0.106526	1	0.893164		487	0.287316	0.873211	0.0112383	1	0.889971		100	0.0564488	0.238806	0.0772732	2	0.75364		196
488	0.386724	0.913894	0.0300152	1	0.908655		178	0.159446	0.482906	0.119761	2	0.748066		258	0.437071	0.772222	0.0413483	2	0.7258		179	0.403241	0.77193	0.105884	3	0.757884		488	0.273901	0.860687	0.106524	1	0.893164		488	0.293167	0.873211	0.0109707	1	0.889971		101	0.0564488	0.243781	0.0772555	2	0.75364		197
489	0.386724	0.915851	0.0299978	1	0.908655		179	0.159446	0.487179	0.119714	2	0.748066		259	0.4524	0.772222	0.0386192	2	0.7258		180	0.409914	0.77193	0.103999	3	0.757884		489	0.275142	0.860687	0.105918	1	0.893164		489	0.293332	0.873211	0.0109698	1	0.889971		102	0.0597337	0.243781	0.0759598	2	0.75364		198
490	0.389138	0.915851	0.0296599	1	0.908655		180	0.160849	0.487179	0.119458	2	0.748066		260	0.4524	0.777778	0.038615	2	0.7258		181	0.410867	0.77193	0.103852	3	0.757884		490	0.275142	0.862595	0.105915	1	0.893164		490	0.293827	0.873211	0.0109517	1	0.889971		103	0.0597337	0.248756	0.0759413	2	0.75364		199
491	0.389483	0.915851	0.0296531	1	0.908655		181	0.160849	0.491453	0.119334	2	0.748066		261	0.463695	0.777778	0.0365195	2	0.7258		182	0.411821	0.77193	0.103665	3	0.757884		491	0.286187	0.862595	0.100801	1	0.893164		491	0.293992	0.873211	0.0109448	1	0.889971		104	0.0602524	0.248756	0.0756805	2	0.75364		200
492	0.395172	0.915851	0.0290099	1	0.908655		182	0.161375	0.491453	0.119224	2	0.748066		262	0.463695	0.783333	0.0365093	2	0.7258		183	0.411821	0.777778	0.103577	3	0.757884		492	0.286187	0.864504	0.100793	1	0.893164		492	0.295805	0.873211	0.0108284	1	0.889971		105	0.0602524	0.253731	0.0755285	2	0.75364		201
493	0.395172	0.917808	0.0290087	1	0.908655		183	0.161375	0.495726	0.119221	2	0.748066		263	0.472368	0.783333	0.0350534	2	0.7258		184	0.41897	0.777778	0.101621	3	0.757884		493	0.287759	0.864504	0.100153	1	0.893164		493	0.29597	0.873211	0.0108241	1	0.889971		106	0.0610304	0.253731	0.0753444	2	0.75364		202
494	0.39569	0.917808	0.02896	1	0.908655		184	0.164006	0.495726	0.1186	2	0.748066		264	0.472771	0.783333	0.035027	2	0.7258		185	0.41897	0.783626	0.101507	3	0.757884		494	0.287759	0.866412	0.100147	1	0.893164		494	0.301245	0.873211	0.0106046	1	0.889971		107	0.0610304	0.258706	0.0752773	2	0.75364		203
495	0.396034	0.917808	0.0289471	1	0.908655		185	0.164006	0.5	0.118459	2	0.748066		265	0.4762	0.783333	0.0345794	2	0.7258		186	0.42898	0.783626	0.099018	3	0.757884		495	0.290365	0.866412	0.0987925	1	0.893164		495	0.301409	0.873211	0.0106038	1	0.889971		108	0.0624136	0.258706	0.0746458	2	0.75364		204
496	0.401034	0.917808	0.028382	1	0.908655		186	0.168918	0.5	0.11733	2	0.748066		266	0.476603	0.783333	0.0345673	2	0.7258		187	0.42898	0.789474	0.0990062	3	0.757884		496	0.290365	0.868321	0.0987861	1	0.893164		496	0.303717	0.873211	0.010481	1	0.889971		109	0.0625864	0.258706	0.0745681	2	0.75364		205
497	0.401034	0.919765	0.0283811	1	0.908655		187	0.168918	0.504274	0.117242	2	0.748066		267	0.48568	0.783333	0.0333512	2	0.7258		188	0.442803	0.789474	0.0948443	3	0.757884		497	0.296157	0.868321	0.0963997	1	0.893164		497	0.303717	0.875256	0.0104807	1	0.889971		110	0.0643154	0.258706	0.0736331	2	0.75364		206
498	0.411897	0.919765	0.0272934	1	0.908655		188	0.170496	0.504274	0.116757	2	0.748066		268	0.48568	0.788889	0.033337	2	0.7258		189	0.442803	0.80117	0.0946009	3	0.757884		498	0.296157	0.870229	0.0963981	1	0.893164		498	0.305942	0.875256	0.010399	1	0.889971		111	0.0643154	0.263682	0.0736256	2	0.75364		207
499	0.411897	0.921722	0.0272673	1	0.908655		189	0.170496	0.508547	0.116672	2	0.748066		269	0.48931	0.788889	0.0329318	2	0.7258		190	0.446139	0.80117	0.0930351	3	0.757884		499	0.297646	0.870229	0.0959949	1	0.893164		499	0.305942	0.877301	0.0103982	1	0.889971		112	0.0675138	0.263682	0.0718689	2	0.75364		208
500	0.430517	0.921722	0.0254857	1	0.908655		190	0.170672	0.508547	0.11664	2	0.748066		270	0.48931	0.794444	0.0329095	2	0.7258		191	0.446139	0.807018	0.0930249	3	0.757884		500	0.297646	0.872137	0.0959626	1	0.893164		500	0.306355	0.877301	0.0103732	1	0.889971		113	0.0676867	0.263682	0.071843	2	0.75364		209
501	0.430517	0.923679	0.0254813	1	0.908655		191	0.170672	0.512821	0.116623	2	0.748066		271	0.497378	0.794444	0.0316709	2	0.7258		192	0.449476	0.807018	0.092032	3	0.757884		501	0.305258	0.872137	0.0930362	1	0.893164		501	0.306519	0.877301	0.0103719	1	0.889971		114	0.0682918	0.263682	0.0713909	2	0.75364		210
502	0.431724	0.923679	0.02537	1	0.908655		192	0.174355	0.512821	0.115527	2	0.748066		272	0.497378	0.8	0.0316627	2	0.7258		193	0.449476	0.812865	0.0920255	3	0.757884		502	0.305258	0.874046	0.0930353	1	0.893164		502	0.309239	0.877301	0.0102055	1	0.889971		115	0.0682918	0.268657	0.0711572	2	0.75364		211
503	0.431724	0.927593	0.0253491	1	0.908655		193	0.174355	0.517094	0.115522	2	0.748066		273	0.497781	0.8	0.0316103	2	0.7258		194	0.451859	0.812865	0.0912262	3	0.757884		503	0.305548	0.874046	0.0929591	1	0.893164		503	0.309404	0.877301	0.0102022	1	0.889971		116	0.0685512	0.268657	0.0709558	2	0.75364		212
504	0.432586	0.927593	0.0252606	1	0.908655		194	0.175057	0.517094	0.115243	2	0.748066		274	0.503832	0.8	0.0308649	2	0.7258		195	0.451859	0.818713	0.0912261	3	0.757884		504	0.305548	0.875954	0.0929563	1	0.893164		504	0.311794	0.877301	0.0101368	1	0.889971		117	0.0685512	0.273632	0.0709444	2	0.75364		213
505	0.432586	0.92955	0.0252408	1	0.908655		195	0.175408	0.517094	0.114884	2	0.748066		275	0.503832	0.805556	0.0308266	2	0.7258		196	0.452812	0.818713	0.0908298	3	0.757884		505	0.313035	0.875954	0.0900179	1	0.893164		505	0.311794	0.879346	0.0101364	1	0.889971		118	0.0686376	0.273632	0.0709143	2	0.75364		214
506	0.453621	0.92955	0.0231394	1	0.908655		196	0.195404	0.517094	0.108963	2	0.748066		276	0.507664	0.805556	0.0300434	2	0.7258		197	0.452812	0.824561	0.0907231	3	0.757884		506	0.313035	0.877863	0.0899893	1	0.893164		506	0.313113	0.879346	0.0100441	1	0.889971		119	0.0686376	0.278607	0.0707792	2	0.75364		215
507	0.453621	0.931507	0.0231193	1	0.908655		197	0.195404	0.521368	0.10884	2	0.748066		277	0.507664	0.811111	0.0300168	2	0.7258		198	0.453765	0.824561	0.090344	3	0.757884		507	0.316014	0.877863	0.0890849	1	0.893164		507	0.313113	0.881391	0.0100424	1	0.889971		120	0.0691563	0.278607	0.0706166	2	0.75364		216
508	0.458448	0.931507	0.0227192	1	0.908655		198	0.198211	0.521368	0.107905	2	0.748066		278	0.524405	0.811111	0.0278543	2	0.7258		199	0.453765	0.836257	0.0899935	3	0.757884		508	0.316014	0.879771	0.0890551	1	0.893164		508	0.313772	0.881391	0.0100238	1	0.889971		121	0.0691563	0.283582	0.0706011	2	0.75364		217
509	0.458448	0.933464	0.0227147	1	0.908655		199	0.198211	0.525641	0.107881	2	0.748066		279	0.524405	0.816667	0.0278543	2	0.7258		200	0.465205	0.836257	0.0870296	3	0.757884		509	0.31924	0.879771	0.0878183	1	0.893164		509	0.313937	0.881391	0.0100217	1	0.889971		122	0.0748617	0.283582	0.0683923	2	0.75364		218
510	0.461034	0.933464	0.0223988	1	0.908655		200	0.198562	0.525641	0.107694	2	0.748066		280	0.528641	0.816667	0.0272313	2	0.7258		201	0.465205	0.842105	0.0870261	3	0.757884		510	0.31924	0.881679	0.0878079	1	0.893164		510	0.315586	0.881391	0.00993959	1	0.889971		123	0.0748617	0.288557	0.0683751	2	0.75364		219
511	0.461034	0.935421	0.0223974	1	0.908655		201	0.198562	0.534188	0.10759	2	0.748066		281	0.528641	0.822222	0.027217	2	0.7258		202	0.465682	0.842105	0.086967	3	0.757884		511	0.348902	0.881679	0.0775495	1	0.893164		511	0.315586	0.883436	0.0099383	1	0.889971		124	0.0765041	0.288557	0.0676075	2	0.75364		220
512	0.461207	0.935421	0.0223887	1	0.908655		202	0.200842	0.534188	0.10689	2	0.748066		282	0.536507	0.822222	0.026215	2	0.7258		203	0.465682	0.847953	0.0869085	3	0.757884		512	0.348902	0.883588	0.0775482	1	0.893164		512	0.321355	0.883436	0.00967133	1	0.889971		125	0.0765041	0.293532	0.0675893	2	0.75364		221
513	0.461207	0.937378	0.0223706	1	0.908655		203	0.200842	0.538462	0.106881	2	0.748066		283	0.53691	0.822222	0.0261735	2	0.7258		204	0.468541	0.847953	0.086263	3	0.757884		513	0.356638	0.883588	0.0750417	1	0.893164		513	0.32152	0.883436	0.00966759	1	0.889971		126	0.0775415	0.293532	0.0671684	2	0.75364		222
514	0.466379	0.937378	0.021749	1	0.908655		204	0.202596	0.538462	0.106458	2	0.748066		284	0.53933	0.822222	0.0257781	2	0.7258		205	0.468541	0.853801	0.0862449	3	0.757884		514	0.356638	0.885496	0.0750365	1	0.893164		514	0.328196	0.883436	0.0094119	1	0.889971		127	0.0775415	0.298507	0.067139	2	0.75364		223
515	0.466724	0.937378	0.0217191	1	0.908655		205	0.202596	0.542735	0.106453	2	0.748066		285	0.53933	0.833333	0.0257552	2	0.7258		206	0.476168	0.853801	0.0842619	3	0.757884		515	0.359782	0.885496	0.074006	1	0.893164		515	0.328361	0.883436	0.00941096	1	0.889971		128	0.0784059	0.298507	0.0667636	2	0.75364		224
516	0.468448	0.937378	0.0215009	1	0.908655		206	0.203473	0.542735	0.106317	2	0.748066		286	0.561113	0.833333	0.0234843	2	0.7258		207	0.476168	0.859649	0.0842526	3	0.757884		516	0.359782	0.887405	0.0740055	1	0.893164		516	0.336603	0.883436	0.0090338	1	0.889971		129	0.0784059	0.303483	0.0666846	2	0.75364		225
517	0.468448	0.939335	0.0214979	1	0.908655		207	0.203473	0.547009	0.106295	2	0.748066		287	0.561113	0.838889	0.0234545	2	0.7258		208	0.485224	0.859649	0.0825474	3	0.757884		517	0.367517	0.887405	0.0716827	1	0.893164		517	0.336767	0.883436	0.0090267	1	0.889971		130	0.0787517	0.303483	0.066576	2	0.75364		226
518	0.473103	0.939335	0.02112	1	0.908655		208	0.204175	0.547009	0.106195	2	0.748066		288	0.563937	0.838889	0.0232044	2	0.7258		209	0.485224	0.865497	0.0823069	3	0.757884		518	0.367517	0.889313	0.0716455	1	0.893164		518	0.340147	0.883436	0.00885563	1	0.889971		131	0.0787517	0.308458	0.0665682	2	0.75364		227
519	0.473103	0.941292	0.021096	1	0.908655		209	0.204876	0.547009	0.106081	2	0.748066		289	0.563937	0.844444	0.0231518	2	0.7258		210	0.516683	0.865497	0.0758312	3	0.757884		519	0.368221	0.889313	0.071494	1	0.893164		519	0.340312	0.883436	0.00884905	1	0.889971		132	0.082296	0.308458	0.0653267	2	0.75364		228
520	0.477414	0.941292	0.0206742	1	0.908655		210	0.214348	0.547009	0.103078	2	0.748066		290	0.582493	0.844444	0.0215313	2	0.7258		211	0.516683	0.871345	0.0757223	3	0.757884		520	0.368221	0.891221	0.0714936	1	0.893164		520	0.340888	0.883436	0.0088318	1	0.889971		133	0.082296	0.313433	0.065311	2	0.75364		229
521	0.477414	0.943249	0.0206736	1	0.908655		211	0.214348	0.551282	0.103059	2	0.748066		291	0.582493	0.85	0.0215113	2	0.7258		212	0.530505	0.871345	0.0731494	3	0.757884		521	0.381541	0.891221	0.0679399	1	0.893164		521	0.341053	0.883436	0.00882796	1	0.889971		134	0.086964	0.313433	0.0632599	2	0.75364		230
522	0.47931	0.943249	0.0205372	1	0.908655		212	0.218383	0.551282	0.101932	2	0.748066		292	0.593384	0.85	0.0205974	2	0.7258		213	0.530505	0.877193	0.0731336	3	0.757884		522	0.381541	0.89313	0.0679197	1	0.893164		522	0.342125	0.883436	0.00877637	1	0.889971		135	0.0871369	0.313433	0.063227	2	0.75364		231
523	0.47931	0.945205	0.0205274	1	0.908655		213	0.218383	0.555556	0.101921	2	0.748066		293	0.593384	0.861111	0.0205787	2	0.7258		214	0.532888	0.877193	0.0722556	3	0.757884		523	0.382038	0.89313	0.0677805	1	0.893164		523	0.34229	0.883436	0.00877118	1	0.889971		136	0.0873963	0.313433	0.0630972	2	0.75364		232
524	0.501552	0.945205	0.018608	1	0.908655		214	0.219435	0.555556	0.101691	2	0.748066		294	0.59883	0.861111	0.0200064	2	0.7258		215	0.532888	0.883041	0.0721379	3	0.757884		524	0.382038	0.895038	0.0677803	1	0.893164		524	0.343279	0.883436	0.0087342	1	0.889971		137	0.0873963	0.318408	0.0630598	2	0.75364		233
525	0.501897	0.945205	0.0186075	1	0.908655		215	0.219435	0.559829	0.101664	2	0.748066		295	0.59883	0.866667	0.0200011	2	0.7258		216	0.547664	0.883041	0.0690033	3	0.757884		525	0.383196	0.895038	0.0675289	1	0.893164		525	0.343444	0.883436	0.00873136	1	0.889971		138	0.0892981	0.318408	0.0623802	2	0.75364		234
526	0.506034	0.945205	0.0182597	1	0.908655		216	0.222417	0.559829	0.100438	2	0.748066		296	0.602057	0.866667	0.0197324	2	0.7258		217	0.547664	0.888889	0.0689748	3	0.757884		526	0.383196	0.896947	0.0675125	1	0.893164		526	0.344268	0.883436	0.00870317	1	0.889971		139	0.0892981	0.323383	0.0623733	2	0.75364		235
527	0.506034	0.947162	0.0182547	1	0.908655		217	0.222417	0.564103	0.100433	2	0.748066		297	0.602057	0.872222	0.0197069	2	0.7258		218	0.552431	0.888889	0.0681681	3	0.757884		527	0.38514	0.896947	0.0669713	1	0.893164		527	0.344433	0.883436	0.00870159	1	0.889971		140	0.0913728	0.323383	0.0616921	2	0.75364		236
528	0.536724	0.947162	0.0158613	1	0.908655		218	0.222768	0.564103	0.100089	2	0.748066		298	0.613554	0.872222	0.018812	2	0.7258		219	0.552431	0.894737	0.0681441	3	0.757884		528	0.38514	0.898855	0.0669478	1	0.893164		528	0.345916	0.883436	0.00864792	1	0.889971		141	0.0913728	0.328358	0.0616885	2	0.75364		237
529	0.536724	0.949119	0.0158314	1	0.908655		219	0.222768	0.568376	0.100046	2	0.748066		299	0.613554	0.877778	0.0188004	2	0.7258		220	0.566254	0.894737	0.0646018	3	0.757884		529	0.385678	0.898855	0.0668063	1	0.893164		529	0.345916	0.885481	0.00864374	1	0.889971		142	0.0927559	0.328358	0.0611879	2	0.75364		238
530	0.547241	0.949119	0.0150136	1	0.908655		220	0.223996	0.568376	0.0991635	2	0.748066		300	0.626664	0.877778	0.0178044	2	0.7258		221	0.566254	0.900585	0.0644938	3	0.757884		530	0.385678	0.900763	0.066804	1	0.893164		530	0.345999	0.885481	0.00863792	1	0.889971		143	0.0927559	0.333333	0.06118	2	0.75364		239
531	0.547241	0.951076	0.0150084	1	0.908655		221	0.224347	0.568376	0.099077	2	0.748066		301	0.626664	0.883333	0.0178037	2	0.7258		222	0.56673	0.900585	0.0644731	3	0.757884		531	0.386175	0.900763	0.066639	1	0.893164		531	0.345999	0.887526	0.00863724	1	0.889971		144	0.0963001	0.333333	0.0597967	2	0.75364		240
532	0.557069	0.951076	0.0144258	1	0.908655		222	0.224697	0.568376	0.0989789	2	0.748066		302	0.627874	0.883333	0.0176519	2	0.7258		223	0.56673	0.906433	0.0644139	3	0.757884		532	0.386175	0.902672	0.066599	1	0.893164		532	0.347729	0.887526	0.00855187	1	0.889971		145	0.0963001	0.338308	0.0597832	2	0.75364		241
533	0.557069	0.953033	0.014419	1	0.908655		223	0.224697	0.57265	0.0989	2	0.748066		303	0.627874	0.888889	0.017602	2	0.7258		224	0.571497	0.906433	0.06336	3	0.757884		533	0.386464	0.902672	0.0665148	1	0.893164		533	0.347729	0.889571	0.00855131	1	0.889971		146	0.0969053	0.338308	0.0596497	2	0.75364		242
534	0.575	0.953033	0.0131075	1	0.908655		224	0.236625	0.57265	0.0942935	2	0.748066		304	0.633925	0.888889	0.0170286	2	0.7258		225	0.571497	0.912281	0.0632879	3	0.757884		534	0.386464	0.90458	0.0665127	1	0.893164		534	0.358444	0.889571	0.00808489	1	0.889971		147	0.0969053	0.343284	0.0596432	2	0.75364		243
535	0.575345	0.953033	0.0130867	1	0.908655		225	0.236625	0.576923	0.0942584	2	0.748066		305	0.633925	0.894444	0.0170254	2	0.7258		226	0.64919	0.912281	0.0475839	3	0.757884		535	0.399288	0.90458	0.0631405	1	0.893164		535	0.358609	0.889571	0.00808344	1	0.889971		148	0.0970781	0.343284	0.0594701	2	0.75364		244
536	0.578276	0.953033	0.0128891	1	0.908655		226	0.24522	0.576923	0.0919014	2	0.748066		306	0.638362	0.894444	0.0166894	2	0.7258		227	0.64919	0.918129	0.0474941	3	0.757884		536	0.399288	0.908397	0.0631129	1	0.893164		536	0.36273	0.889571	0.00790107	1	0.889971		149	0.0970781	0.348259	0.0594676	2	0.75364		245
537	0.578276	0.95499	0.0128818	1	0.908655		227	0.24522	0.581197	0.0918625	2	0.748066		307	0.638362	0.9	0.0166821	2	0.7258		228	0.663012	0.918129	0.0450651	3	0.757884		537	0.41476	0.908397	0.0590163	1	0.893164		537	0.36273	0.891616	0.00789941	1	0.889971		150	0.0989799	0.348259	0.058946	2	0.75364		246
538	0.578448	0.95499	0.0128797	1	0.908655		228	0.245746	0.581197	0.0917245	2	0.748066		308	0.656918	0.9	0.0151185	2	0.7258		229	0.663012	0.923977	0.0450253	3	0.757884		538	0.41476	0.910305	0.0590059	1	0.893164		538	0.366191	0.891616	0.00777066	1	0.889971		151	0.0989799	0.353234	0.0588514	2	0.75364		247
539	0.578448	0.956947	0.0128776	1	0.908655		229	0.245746	0.58547	0.091716	2	0.748066		309	0.656918	0.905556	0.0151078	2	0.7258		230	0.704004	0.923977	0.0382428	3	0.757884		539	0.415257	0.910305	0.058913	1	0.893164		539	0.366356	0.891616	0.00776834	1	0.889971		152	0.0991528	0.353234	0.0587841	2	0.75364		248
540	0.586897	0.956947	0.0123531	1	0.908655		230	0.24715	0.58547	0.0913312	2	0.748066		310	0.671238	0.905556	0.0141474	2	0.7258		231	0.704004	0.929825	0.0381623	3	0.757884		540	0.415257	0.912214	0.0588728	1	0.893164		540	0.369241	0.891616	0.00768921	1	0.889971		153	0.0991528	0.358209	0.0587771	2	0.75364		249
541	0.586897	0.958904	0.0123285	1	0.908655		231	0.24715	0.589744	0.0912749	2	0.748066		311	0.671238	0.911111	0.0141142	2	0.7258		232	0.722116	0.929825	0.0352356	3	0.757884		541	0.418732	0.912214	0.0580419	1	0.893164		541	0.369406	0.891616	0.0076852	1	0.889971		154	0.0994122	0.358209	0.0587093	2	0.75364		250
542	0.601379	0.958904	0.0116022	1	0.908655		232	0.247325	0.589744	0.091273	2	0.748066		312	0.678096	0.911111	0.0136698	2	0.7258		233	0.722116	0.935673	0.0351818	3	0.757884		542	0.418732	0.914122	0.05803	1	0.893164		542	0.370889	0.891616	0.0076184	1	0.889971		155	0.0994122	0.363184	0.0586353	2	0.75364		251
543	0.601379	0.960861	0.0115759	1	0.908655		233	0.247325	0.594017	0.0911734	2	0.748066		313	0.678096	0.916667	0.0136517	2	0.7258		234	0.725453	0.935673	0.0348066	3	0.757884		543	0.418773	0.914122	0.0580238	1	0.893164		543	0.370889	0.893661	0.00761598	1	0.889971		156	0.101141	0.363184	0.058063	2	0.75364		252
544	0.627069	0.960861	0.0102906	1	0.908655		234	0.248027	0.594017	0.0907595	2	0.748066		314	0.679306	0.916667	0.0135845	2	0.7258		235	0.725453	0.94152	0.0347277	3	0.757884		544	0.418773	0.916031	0.0580209	1	0.893164		544	0.371219	0.893661	0.00759528	1	0.889971		157	0.101141	0.368159	0.0580413	2	0.75364		253
545	0.627069	0.962818	0.0102893	1	0.908655		235	0.248377	0.594017	0.0907544	2	0.748066		315	0.679306	0.922222	0.0135444	2	0.7258		236	0.753098	0.94152	0.0309097	3	0.757884		545	0.426054	0.916031	0.0560187	1	0.893164		545	0.371219	0.895706	0.00759419	1	0.889971		158	0.102524	0.368159	0.0576223	2	0.75364		254
546	0.636207	0.962818	0.00985843	1	0.908655		236	0.249781	0.594017	0.0903621	2	0.748066		316	0.680315	0.922222	0.0133973	2	0.7258		237	0.753098	0.947368	0.0308718	3	0.757884		546	0.426054	0.917939	0.0559928	1	0.893164		546	0.382181	0.895706	0.00724957	1	0.889971		159	0.102524	0.373134	0.0575889	2	0.75364		255
547	0.636207	0.964775	0.00985343	1	0.908655		237	0.249781	0.602564	0.0902772	2	0.748066		317	0.680718	0.922222	0.0133824	2	0.7258		238	0.786463	0.947368	0.0267319	3	0.757884		547	0.430356	0.917939	0.0550597	1	0.893164		547	0.382181	0.897751	0.00724902	1	0.889971		160	0.103475	0.373134	0.0574585	2	0.75364		256
548	0.647069	0.964775	0.00943771	1	0.908655		238	0.251184	0.602564	0.0899585	2	0.748066		318	0.686567	0.922222	0.0129135	2	0.7258		239	0.786463	0.953216	0.0267055	3	0.757884		548	0.430356	0.919847	0.0550587	1	0.893164		548	0.382428	0.897751	0.00722862	1	0.889971		161	0.103475	0.378109	0.0574355	2	0.75364		257
549	0.647069	0.966732	0.00942747	1	0.908655		239	0.251184	0.606838	0.0898224	2	0.748066		319	0.686971	0.922222	0.0129032	2	0.7258		240	0.817445	0.953216	0.0228619	3	0.757884		549	0.430646	0.919847	0.0549904	1	0.893164		549	0.382428	0.899796	0.00722665	1	0.889971		162	0.108143	0.378109	0.0556192	2	0.75364		258
550	0.685172	0.966732	0.00756614	1	0.908655		240	0.252236	0.606838	0.0896331	2	0.748066		320	0.713998	0.922222	0.0112334	2	0.7258		241	0.817445	0.959064	0.0228318	3	0.757884		550	0.430646	0.921756	0.0549765	1	0.893164		550	0.386632	0.899796	0.00707086	1	0.889971		163	0.108143	0.383085	0.0556055	2	0.75364		259
551	0.685172	0.968689	0.0075661	1	0.908655		241	0.252587	0.606838	0.0895879	2	0.748066		321	0.713998	0.927778	0.0112251	2	0.7258		242	0.834128	0.959064	0.0205048	3	0.757884		551	0.449965	0.921756	0.0508714	1	0.893164		551	0.386796	0.899796	0.00706731	1	0.889971		164	0.108662	0.383085	0.0554682	2	0.75364		260
552	0.685517	0.968689	0.00755924	1	0.908655		242	0.257674	0.606838	0.0876583	2	0.748066		322	0.726704	0.927778	0.0105525	2	0.7258		243	0.834128	0.964912	0.0204237	3	0.757884		552	0.449965	0.923664	0.050863	1	0.893164		552	0.393802	0.899796	0.0068271	1	0.889971		165	0.108662	0.38806	0.0554633	2	0.75364		261
553	0.685517	0.970646	0.0075539	1	0.908655		243	0.257674	0.611111	0.0876364	2	0.748066		323	0.727309	0.927778	0.0105485	2	0.7258		244	0.835081	0.964912	0.0203767	3	0.757884		553	0.451992	0.923664	0.050503	1	0.893164		553	0.393802	0.903885	0.00681758	1	0.889971		166	0.108748	0.38806	0.055445	2	0.75364		262
554	0.704655	0.970646	0.00683492	1	0.908655		244	0.258025	0.611111	0.0875329	2	0.748066		324	0.735781	0.927778	0.0100642	2	0.7258		245	0.835081	0.97076	0.0203166	3	0.757884		554	0.451992	0.925573	0.0505024	1	0.893164		554	0.394956	0.903885	0.00678914	1	0.889971		167	0.108921	0.38806	0.0554157	2	0.75364		263
555	0.704655	0.972603	0.00682585	1	0.908655		245	0.258025	0.619658	0.0873734	2	0.748066		325	0.735781	0.933333	0.0100633	2	0.7258		246	0.836988	0.97076	0.0200732	3	0.757884		555	0.468953	0.925573	0.047243	1	0.893164		555	0.395121	0.903885	0.00678525	1	0.889971		168	0.111687	0.38806	0.0544401	2	0.75364		264
556	0.704828	0.972603	0.00682249	1	0.908655		246	0.259604	0.619658	0.0869574	2	0.748066		326	0.744857	0.933333	0.00952215	2	0.7258		247	0.836988	0.976608	0.0200449	3	0.757884		556	0.468953	0.927481	0.0472391	1	0.893164		556	0.397346	0.903885	0.00670043	1	0.889971		169	0.111687	0.393035	0.0544235	2	0.75364		265
557	0.704828	0.97456	0.0068079	1	0.908655		247	0.259604	0.623932	0.0869264	2	0.748066		327	0.744857	0.938889	0.00952003	2	0.7258		248	0.842707	0.976608	0.0194027	3	0.757884		557	0.482108	0.927481	0.0446111	1	0.893164		557	0.397346	0.90593	0.0067004	1	0.889971		170	0.113157	0.393035	0.0541664	2	0.75364		266
558	0.706897	0.97456	0.00669194	1	0.908655		248	0.264866	0.623932	0.0855658	2	0.748066		328	0.746672	0.938889	0.0093508	2	0.7258		249	0.843661	0.976608	0.0193548	3	0.757884		558	0.482108	0.929389	0.04461	1	0.893164		558	0.406	0.90593	0.00644137	1	0.889971		171	0.11333	0.393035	0.0541387	2	0.75364		267
559	0.707241	0.97456	0.00669119	1	0.908655		249	0.264866	0.628205	0.0855079	2	0.748066		329	0.746672	0.944444	0.00934644	2	0.7258		250	0.858437	0.976608	0.0172533	3	0.757884		559	0.496173	0.929389	0.0418758	1	0.893164		559	0.406165	0.90593	0.00644011	1	0.889971		172	0.113935	0.393035	0.0539192	2	0.75364		268
560	0.713966	0.97456	0.00645675	1	0.908655		250	0.273461	0.628205	0.0835448	2	0.748066		330	0.751916	0.944444	0.00914757	2	0.7258		251	0.858437	0.982456	0.0172039	3	0.757884		560	0.496173	0.931298	0.0418725	1	0.893164		560	0.41861	0.90593	0.00606966	1	0.889971		173	0.113935	0.39801	0.0539129	2	0.75364		269
561	0.71431	0.97456	0.00645159	1	0.908655		251	0.273461	0.632479	0.0834822	2	0.748066		331	0.751916	0.95	0.00913518	2	0.7258		252	0.883222	0.982456	0.0145507	3	0.757884		561	0.497828	0.931298	0.0416031	1	0.893164		561	0.418775	0.90593	0.00606868	1	0.889971		174	0.114886	0.39801	0.0536452	2	0.75364		270
562	0.738793	0.97456	0.00561668	1	0.908655		252	0.2796	0.632479	0.0818547	2	0.748066		332	0.762001	0.95	0.00855286	2	0.7258		253	0.883222	0.988304	0.0145416	3	0.757884		562	0.497828	0.933206	0.0415994	1	0.893164		562	0.419435	0.90593	0.00605678	1	0.889971		175	0.114886	0.402985	0.0536167	2	0.75364		271
563	0.738793	0.976517	0.00561257	1	0.908655		253	0.279951	0.632479	0.0817807	2	0.748066		333	0.762001	0.955556	0.0084985	2	0.7258		254	0.9204	0.988304	0.0107644	3	0.757884		563	0.512018	0.933206	0.0390839	1	0.893164		563	0.419435	0.907975	0.00605655	1	0.889971		176	0.115923	0.402985	0.0533174	2	0.75364		272
564	0.751207	0.976517	0.00527624	1	0.908655		254	0.285739	0.632479	0.0804668	2	0.748066		334	0.78338	0.955556	0.00742622	2	0.7258		255	0.9204	0.994152	0.0106696	3	0.757884		564	0.512018	0.935115	0.0390728	1	0.893164		564	0.423885	0.907975	0.00594771	1	0.889971		177	0.116096	0.402985	0.0533097	2	0.75364		273
565	0.751724	0.976517	0.00527427	1	0.908655		255	0.285739	0.636752	0.080391	2	0.748066		335	0.78338	0.961111	0.00742616	2	0.7258		256	1	0.994152	0.000901054	3	0.757884		565	0.515575	0.935115	0.0384194	1	0.893164		565	0.42405	0.907975	0.00594753	1	0.889971		178	0.116874	0.402985	0.0532121	2	0.75364		274
566	0.757069	0.976517	0.00513236	1	0.908655		256	0.287493	0.636752	0.0801068	2	0.748066		336	0.792658	0.961111	0.00700333	2	0.7258		257	1	1	0.000629206	3	0.757884		566	0.515575	0.937023	0.0384167	1	0.893164		566	0.428501	0.907975	0.00585739	1	0.889971		179	0.116874	0.40796	0.0532098	2	0.75364		275
567	0.757069	0.978474	0.00512691	1	0.908655		257	0.287493	0.641026	0.0799531	2	0.748066		337	0.792658	0.966667	0.00698363	2	0.7258		0	0	0	1.99636	4	0.72613		567	0.528151	0.937023	0.0363007	1	0.893164		567	0.428666	0.907975	0.00585672	1	0.889971		180	0.11722	0.40796	0.0531547	2	0.75364		276
568	0.759138	0.978474	0.00503948	1	0.908655		258	0.28837	0.641026	0.0798432	2	0.748066		338	0.821097	0.966667	0.00581057	2	0.7258		1	0	0.00452489	0.99636	4	0.72613		568	0.528151	0.938931	0.0362931	1	0.893164		568	0.430149	0.907975	0.00581521	1	0.889971		181	0.11722	0.412935	0.0531447	2	0.75364		277
569	0.759138	0.980431	0.00503167	1	0.908655		259	0.28837	0.645299	0.079817	2	0.748066		339	0.821097	0.972222	0.00578646	2	0.7258		2	0	0.0180995	0.987031	4	0.72613		569	0.539734	0.938931	0.034857	1	0.893164		569	0.430314	0.907975	0.00581449	1	0.889971		182	0.118084	0.412935	0.0528892	2	0.75364		278
570	0.76431	0.980431	0.00482391	1	0.908655		260	0.295738	0.645299	0.0783998	2	0.748066		340	0.831989	0.972222	0.00524868	2	0.7258		3	0	0.0271493	0.947186	4	0.72613		570	0.539734	0.94084	0.0348552	1	0.893164		570	0.433364	0.907975	0.00571973	1	0.889971		183	0.118084	0.41791	0.0528467	2	0.75364		279
571	0.76431	0.982387	0.00482075	1	0.908655		261	0.295738	0.649573	0.0783344	2	0.748066		341	0.832392	0.972222	0.0052441	2	0.7258		4	0	0.0316742	0.936459	4	0.72613		571	0.542672	0.94084	0.0345118	1	0.893164		571	0.433528	0.907975	0.00571839	1	0.889971		184	0.122061	0.41791	0.0515152	2	0.75364		280
572	0.76931	0.982387	0.00467678	1	0.908655		262	0.296264	0.649573	0.0781246	2	0.748066		342	0.846511	0.972222	0.00476785	2	0.7258		5	0.000597015	0.0316742	0.916961	4	0.72613		572	0.542672	0.942748	0.0345099	1	0.893164		572	0.440452	0.907975	0.00554833	1	0.889971		185	0.122061	0.422886	0.0515072	2	0.75364		281
573	0.76931	0.984344	0.00467322	1	0.908655		263	0.296615	0.649573	0.0781111	2	0.748066		343	0.846511	0.977778	0.00476136	2	0.7258		6	0.000597015	0.0361991	0.915902	4	0.72613		573	0.560915	0.942748	0.0328417	1	0.893164		573	0.440452	0.91002	0.00554517	1	0.889971		186	0.122147	0.422886	0.0514968	2	0.75364		282
574	0.77431	0.984344	0.00457309	1	0.908655		264	0.296615	0.653846	0.0780079	2	0.748066		344	0.873941	0.977778	0.00372399	2	0.7258		7	0.00119403	0.0361991	0.883973	4	0.72613		574	0.560915	0.944656	0.0328413	1	0.893164		574	0.446221	0.91002	0.00537835	1	0.889971		187	0.122147	0.427861	0.0514851	2	0.75364		283
575	0.77431	0.986301	0.00456759	1	0.908655		265	0.298544	0.653846	0.0772475	2	0.748066		345	0.873941	0.983333	0.00372282	2	0.7258		8	0.00119403	0.0588235	0.779904	4	0.72613		575	0.568444	0.944656	0.0323553	1	0.893164		575	0.446221	0.912065	0.00537801	1	0.889971		188	0.124654	0.427861	0.050758	2	0.75364		284
576	0.784655	0.986301	0.00425921	1	0.908655		266	0.298544	0.65812	0.0771995	2	0.748066		346	0.970149	0.983333	0.000693053	2	0.7258		9	0.00238806	0.0588235	0.724826	4	0.72613		576	0.568444	0.946565	0.0323552	1	0.893164		576	0.454051	0.912065	0.00518331	1	0.889971		189	0.124827	0.427861	0.0506962	2	0.75364		285
577	0.784655	0.988258	0.00424925	1	0.908655		267	0.299947	0.65812	0.0767605	2	0.748066		347	0.970149	0.988889	0.00069295	2	0.7258		10	0.00238806	0.0678733	0.648997	4	0.72613		577	0.571836	0.946565	0.032172	1	0.893164		577	0.454051	0.91411	0.00518328	1	0.889971		190	0.125519	0.427861	0.0505952	2	0.75364		286
578	0.803448	0.988258	0.00369085	1	0.908655		268	0.299947	0.662393	0.0767505	2	0.748066		348	0.973376	0.988889	0.000637946	2	0.7258		11	0.00358209	0.0678733	0.622045	4	0.72613		578	0.571836	0.948473	0.0321663	1	0.893164		578	0.456359	0.91411	0.005126	1	0.889971		191	0.125519	0.437811	0.0505836	2	0.75364		287
579	0.803793	0.988258	0.00369077	1	0.908655		269	0.306437	0.662393	0.0751122	2	0.748066		349	0.973376	0.994444	0.000635909	2	0.7258		12	0.00358209	0.0723982	0.614594	4	0.72613		579	0.572333	0.948473	0.0321277	1	0.893164		579	0.456359	0.916155	0.00512378	1	0.889971		192	0.128976	0.437811	0.049364	2	0.75364		288
580	0.808276	0.988258	0.00356337	1	0.908655		270	0.306437	0.666667	0.0750807	2	0.748066		350	0.973981	0.994444	0.000626766	2	0.7258		13	0.00597015	0.0723982	0.547932	4	0.72613		580	0.572333	0.950382	0.0321262	1	0.893164		580	0.471606	0.916155	0.0047784	1	0.889971		193	0.128976	0.442786	0.0493483	2	0.75364		289
581	0.808276	0.990215	0.00355655	1	0.908655		271	0.308016	0.666667	0.0746926	2	0.748066		351	0.973981	1	0.000625297	2	0.7258		14	0.00597015	0.081448	0.475749	4	0.72613		581	0.632483	0.950382	0.0270188	1	0.893164		581	0.471606	0.9182	0.00477598	1	0.889971		194	0.130273	0.442786	0.0490869	2	0.75364		290
582	0.835	0.990215	0.00293373	1	0.908655		272	0.308016	0.67094	0.0746025	2	0.748066		352	0.983864	1	0.000437518	2	0.7258		15	0.00716418	0.081448	0.46995	4	0.72613		582	0.632483	0.95229	0.0270116	1	0.893164		582	0.476469	0.9182	0.00466696	1	0.889971		195	0.130273	0.447761	0.0490742	2	0.75364		291
583	0.835	0.992172	0.00293332	1	0.908655		273	0.309244	0.67094	0.0743779	2	0.748066		353	0.984268	1	0.000435882	2	0.7258		16	0.00716418	0.0950226	0.455047	4	0.72613		583	0.638895	0.95229	0.0263927	1	0.893164		583	0.476469	0.920245	0.00466322	1	0.889971		196	0.133904	0.447761	0.0483154	2	0.75364		292
584	0.847069	0.992172	0.00262881	1	0.908655		274	0.309244	0.675214	0.0743649	2	0.748066		354	1	1	4.96177e-05	2	0.7258		17	0.00895522	0.0950226	0.445664	4	0.72613		584	0.638895	0.954198	0.026392	1	0.893164		584	0.476964	0.920245	0.00465032	1	0.889971		197	0.133904	0.452736	0.0482761	2	0.75364		293
585	0.847414	0.992172	0.00262205	1	0.908655		275	0.311524	0.675214	0.0739222	2	0.748066		0	0	0	1.99942	3	0.731134		18	0.00895522	0.0995475	0.430155	4	0.72613		585	0.641129	0.954198	0.0261686	1	0.893164		585	0.476964	0.92229	0.00464725	1	0.889971		198	0.134077	0.452736	0.0482168	2	0.75364		294
586	0.858793	0.992172	0.00238392	1	0.908655		276	0.311524	0.679487	0.0738941	2	0.748066		1	0	0.00763359	0.999422	3	0.731134		19	0.0101493	0.0995475	0.421932	4	0.72613		586	0.641129	0.956107	0.0261674	1	0.893164		586	0.477046	0.92229	0.00464266	1	0.889971		199	0.13425	0.452736	0.0481966	2	0.75364		295
587	0.858793	0.994129	0.00238068	1	0.908655		277	0.312928	0.679487	0.0733956	2	0.748066		2	0	0.0114504	0.998779	3	0.731134		20	0.0101493	0.108597	0.413913	4	0.72613		587	0.647582	0.956107	0.025564	1	0.893164		587	0.477211	0.92229	0.00464075	1	0.889971		200	0.144277	0.452736	0.0459064	2	0.75364		296
588	0.884655	0.994129	0.001862	1	0.908655		278	0.313278	0.679487	0.0733058	2	0.748066		3	0.000237982	0.0114504	0.99778	3	0.731134		21	0.0125373	0.108597	0.390652	4	0.72613		588	0.647582	0.958015	0.0255625	1	0.893164		588	0.482239	0.92229	0.00451447	1	0.889971		201	0.144277	0.457711	0.0458661	2	0.75364		297
589	0.884655	0.996086	0.00186141	1	0.908655		279	0.315383	0.679487	0.0728917	2	0.748066		4	0.000237982	0.0305344	0.991888	3	0.731134		22	0.0125373	0.113122	0.385534	4	0.72613		589	0.647623	0.958015	0.0255586	1	0.893164		589	0.482239	0.92638	0.00451382	1	0.889971		202	0.145833	0.457711	0.0453566	2	0.75364		298
590	0.977931	0.996086	0.000313383	1	0.908655		280	0.315383	0.683761	0.0728851	2	0.748066		5	0.000713946	0.0305344	0.971756	3	0.731134		23	0.0131343	0.113122	0.38526	4	0.72613		590	0.647623	0.959924	0.0255584	1	0.893164		590	0.488667	0.92638	0.00436743	1	0.889971		203	0.145833	0.462687	0.0453402	2	0.75364		299
591	0.977931	0.998043	0.000312649	1	0.908655		281	0.320996	0.683761	0.0712306	2	0.748066		6	0.000713946	0.0343511	0.971495	3	0.731134		24	0.0131343	0.117647	0.38406	4	0.72613		591	0.667811	0.959924	0.0237613	1	0.893164		591	0.488832	0.92638	0.00436664	1	0.889971		204	0.1486	0.462687	0.0446513	2	0.75364		300
592	0.982241	0.998043	0.000272804	1	0.908655		282	0.320996	0.688034	0.0711044	2	0.748066		7	0.000951928	0.0343511	0.954322	3	0.731134		25	0.0155224	0.117647	0.377494	4	0.72613		592	0.667811	0.961832	0.023758	1	0.893164		592	0.492376	0.92638	0.00430108	1	0.889971		205	0.148772	0.462687	0.0446335	2	0.75364		301
593	0.982241	1	0.000270438	1	0.908655		283	0.325908	0.688034	0.069682	2	0.748066		8	0.000951928	0.0419847	0.951305	3	0.731134		26	0.0155224	0.126697	0.371564	4	0.72613		593	0.668432	0.961832	0.0237135	1	0.893164		593	0.492376	0.928425	0.00430049	1	0.889971		206	0.149205	0.462687	0.0445072	2	0.75364		302
594	0.986207	1	0.000218759	1	0.908655		284	0.325908	0.692308	0.069663	2	0.748066		9	0.00142789	0.0419847	0.912439	3	0.731134		27	0.0161194	0.126697	0.369413	4	0.72613		594	0.668432	0.96374	0.0237126	1	0.893164		594	0.497733	0.928425	0.00419078	1	0.889971		207	0.149378	0.462687	0.0445072	2	0.75364		303
595	0.986552	1	0.000217941	1	0.908655		285	0.327311	0.692308	0.0694179	2	0.748066		10	0.00142789	0.0458015	0.908893	3	0.731134		28	0.0161194	0.135747	0.362481	4	0.72613		595	0.716378	0.96374	0.01908	1	0.893164		595	0.497733	0.93047	0.00418985	1	0.889971		208	0.149637	0.462687	0.044414	2	0.75364		304
596	1	1	2.48088e-05	1	0.908655		286	0.327311	0.696581	0.0693492	2	0.748066		11	0.00214184	0.0458015	0.866549	3	0.731134		29	0.0179104	0.135747	0.359593	4	0.72613		596	0.716378	0.965649	0.0190781	1	0.893164		596	0.504574	0.93047	0.00405543	1	0.889971		209	0.149637	0.467662	0.044364	2	0.75364		305
0	0	0	1.99998	2	0.876668		287	0.334152	0.696581	0.0679273	2	0.748066		12	0.00214184	0.0534351	0.859221	3	0.731134		30	0.0179104	0.140271	0.353923	4	0.72613		597	0.755512	0.965649	0.0153612	1	0.893164		597	0.504574	0.932515	0.00405427	1	0.889971		210	0.150761	0.467662	0.0441446	2	0.75364		306
1	0	0.00164474	0.999979	2	0.876668		288	0.334152	0.700855	0.0678477	2	0.748066		13	0.00214184	0.0572519	0.854402	3	0.731134		31	0.0191045	0.140271	0.351162	4	0.72613		598	0.755512	0.967557	0.0153601	1	0.893164		598	0.515042	0.932515	0.00385238	1	0.889971		211	0.150934	0.467662	0.0441385	2	0.75364		307
2	0	0.00493421	0.999886	2	0.876668		289	0.334327	0.700855	0.0676951	2	0.748066		14	0.0026178	0.0572519	0.852252	3	0.731134		32	0.0191045	0.149321	0.342716	4	0.72613		599	0.758615	0.967557	0.0150698	1	0.893164		599	0.515042	0.93456	0.00385148	1	0.889971		212	0.151366	0.467662	0.0440342	2	0.75364		308
3	0	0.00822368	0.999853	2	0.876668		290	0.334327	0.705128	0.0676715	2	0.748066		15	0.00309376	0.0572519	0.84409	3	0.731134		33	0.0220896	0.149321	0.331159	4	0.72613		600	0.758615	0.969466	0.0150658	1	0.893164		600	0.516525	0.93456	0.00381432	1	0.889971		213	0.151366	0.472637	0.0440156	2	0.75364		309
4	0	0.0115132	0.999843	2	0.876668		291	0.338011	0.705128	0.0666589	2	0.748066		16	0.00356973	0.0572519	0.812422	3	0.731134		34	0.0232836	0.149321	0.330128	4	0.72613		601	0.761056	0.969466	0.0147812	1	0.893164		601	0.51669	0.93456	0.00381168	1	0.889971		214	0.151798	0.472637	0.0439335	2	0.75364		310
5	0	0.03125	0.999592	2	0.876668		292	0.338011	0.709402	0.0666395	2	0.748066		17	0.00356973	0.0610687	0.811834	3	0.731134		35	0.0232836	0.158371	0.327247	4	0.72613		602	0.761056	0.971374	0.0147801	1	0.893164		602	0.519492	0.93456	0.0037498	1	0.889971		215	0.151971	0.472637	0.0439032	2	0.75364		311
6	0	0.0378289	0.999517	2	0.876668		293	0.349763	0.709402	0.063951	2	0.748066		18	0.00404569	0.0610687	0.805339	3	0.731134		36	0.0250746	0.158371	0.322999	4	0.72613		603	0.764117	0.971374	0.0145067	1	0.893164		603	0.519657	0.93456	0.00374402	1	0.889971		216	0.152317	0.472637	0.0438894	2	0.75364		312
7	0	0.0460526	0.999398	2	0.876668		294	0.349763	0.713675	0.0639479	2	0.748066		19	0.00404569	0.0648855	0.804074	3	0.731134		37	0.0250746	0.162896	0.321431	4	0.72613		604	0.764117	0.973282	0.0145045	1	0.893164		604	0.519822	0.93456	0.00373556	1	0.889971		217	0.152317	0.477612	0.0438569	2	0.75364		313
8	0	0.0493421	0.999378	2	0.876668		295	0.353271	0.713675	0.0630783	2	0.748066		20	0.00618753	0.0648855	0.702558	3	0.731134		38	0.0256716	0.162896	0.320328	4	0.72613		605	0.775245	0.973282	0.0135854	1	0.893164		605	0.519822	0.936605	0.00373486	1	0.889971		218	0.152922	0.477612	0.0436446	2	0.75364		314
9	0	0.0542763	0.999226	2	0.876668		296	0.353271	0.717949	0.0630673	2	0.748066		21	0.00666349	0.0648855	0.701322	3	0.731134		39	0.0256716	0.167421	0.320322	4	0.72613		606	0.775245	0.975191	0.0135828	1	0.893164		606	0.521141	0.936605	0.00370567	1	0.889971		219	0.152922	0.482587	0.0436301	2	0.75364		315
10	0	0.0575658	0.99915	2	0.876668		297	0.354675	0.717949	0.062633	2	0.748066		22	0.00713946	0.0648855	0.697565	3	0.731134		40	0.0274627	0.167421	0.312844	4	0.72613		607	0.776279	0.975191	0.013495	1	0.893164		607	0.521306	0.936605	0.00370458	1	0.889971		220	0.153527	0.482587	0.043495	2	0.75364		316
11	0	0.0592105	0.999092	2	0.876668		298	0.354675	0.722222	0.0625734	2	0.748066		23	0.00713946	0.0687023	0.691314	3	0.731134		41	0.0274627	0.176471	0.310048	4	0.72613		608	0.776279	0.977099	0.0134918	1	0.893164		608	0.523366	0.936605	0.00366083	1	0.889971		221	0.153527	0.487562	0.0434853	2	0.75364		317
12	0	0.0625	0.999082	2	0.876668		299	0.355025	0.722222	0.0625525	2	0.748066		24	0.00904331	0.0687023	0.621359	3	0.731134		42	0.0280597	0.176471	0.309555	4	0.72613		609	0.783808	0.977099	0.0126875	1	0.893164		609	0.523366	0.93865	0.0036596	1	0.889971		222	0.154997	0.487562	0.0431423	2	0.75364		318
13	0	0.0740132	0.998623	2	0.876668		300	0.356604	0.722222	0.0620234	2	0.748066		25	0.00904331	0.0725191	0.619747	3	0.731134		43	0.0280597	0.180995	0.308623	4	0.72613		610	0.783808	0.979008	0.0126862	1	0.893164		610	0.528064	0.93865	0.00359616	1	0.889971		223	0.154997	0.492537	0.0430964	2	0.75364		319
14	0	0.0773026	0.998617	2	0.876668		301	0.356604	0.726496	0.0620166	2	0.748066		26	0.0104712	0.0725191	0.602047	3	0.731134		44	0.0292537	0.180995	0.307443	4	0.72613		611	0.791958	0.979008	0.0118582	1	0.893164		611	0.528394	0.93865	0.00359458	1	0.889971		224	0.156812	0.492537	0.0426495	2	0.75364		320
15	0	0.0805921	0.998606	2	0.876668		302	0.358007	0.726496	0.0616564	2	0.748066		27	0.0104712	0.0763359	0.597626	3	0.731134		45	0.0292537	0.190045	0.304119	4	0.72613		612	0.791958	0.980916	0.0118575	1	0.893164		612	0.528723	0.93865	0.00359195	1	0.889971		225	0.156985	0.492537	0.0426372	2	0.75364		321
16	0	0.0838816	0.998541	2	0.876668		303	0.358358	0.726496	0.0616545	2	0.748066		28	0.0107092	0.0763359	0.592214	3	0.731134		46	0.0304478	0.190045	0.30221	4	0.72613		613	0.801266	0.980916	0.0109821	1	0.893164		613	0.528888	0.93865	0.00359189	1	0.889971		226	0.158368	0.492537	0.0422825	2	0.75364		322
17	0	0.09375	0.998259	2	0.876668		304	0.36134	0.726496	0.060482	2	0.748066		29	0.0107092	0.0839695	0.582477	3	0.731134		47	0.0304478	0.19457	0.298636	4	0.72613		614	0.801266	0.982824	0.0109814	1	0.893164		614	0.541828	0.93865	0.00339893	1	0.889971		227	0.158368	0.497512	0.0422701	2	0.75364		323
18	0	0.0970395	0.998242	2	0.876668		305	0.36134	0.730769	0.0604708	2	0.748066		30	0.0118991	0.0839695	0.546473	3	0.731134		48	0.0328358	0.19457	0.29384	4	0.72613		615	0.8035	0.982824	0.010782	1	0.893164		615	0.541993	0.93865	0.00339705	1	0.889971		228	0.160183	0.497512	0.0419215	2	0.75364		324
19	0	0.100329	0.997995	2	0.876668		306	0.362217	0.730769	0.0601949	2	0.748066		31	0.0118991	0.0877863	0.543054	3	0.731134		49	0.0328358	0.199095	0.292747	4	0.72613		616	0.8035	0.984733	0.0107762	1	0.893164		616	0.543724	0.93865	0.00337174	1	0.889971		229	0.160356	0.497512	0.0419209	2	0.75364		325
20	0	0.106908	0.997907	2	0.876668		307	0.362217	0.735043	0.0600304	2	0.748066		32	0.012851	0.0877863	0.499601	3	0.731134		50	0.0346269	0.199095	0.285518	4	0.72613		617	0.81529	0.984733	0.00969846	1	0.893164		617	0.543724	0.940695	0.00337127	1	0.889971		230	0.161393	0.497512	0.0417281	2	0.75364		326
21	0	0.113487	0.99771	2	0.876668		308	0.369233	0.735043	0.0585081	2	0.748066		33	0.012851	0.0916031	0.498193	3	0.731134		51	0.0346269	0.20362	0.285097	4	0.72613		618	0.81529	0.986641	0.00969779	1	0.893164		618	0.547185	0.940695	0.0033073	1	0.889971		231	0.161393	0.502488	0.0417274	2	0.75364		327
22	0.000175408	0.113487	0.997609	2	0.876668		309	0.369584	0.735043	0.0584984	2	0.748066		34	0.0149929	0.0916031	0.438333	3	0.731134		52	0.038806	0.20362	0.278029	4	0.72613		619	0.839863	0.986641	0.00724536	1	0.893164		619	0.547185	0.94274	0.00330371	1	0.889971		232	0.162172	0.502488	0.0415168	2	0.75364		328
23	0.000175408	0.123355	0.997038	2	0.876668		310	0.36976	0.735043	0.0584637	2	0.748066		35	0.0149929	0.0954198	0.432279	3	0.731134		53	0.038806	0.21267	0.275308	4	0.72613		620	0.839863	0.98855	0.007234	1	0.893164		620	0.556828	0.94274	0.00315362	1	0.889971		233	0.162344	0.502488	0.0415165	2	0.75364		329
24	0.000175408	0.126645	0.99698	2	0.876668		311	0.36976	0.739316	0.0584616	2	0.748066		36	0.0157068	0.0954198	0.417361	3	0.731134		54	0.039403	0.21267	0.274766	4	0.72613		621	0.861995	0.98855	0.00540143	1	0.893164		621	0.556828	0.944785	0.00315347	1	0.889971		234	0.168396	0.502488	0.0402215	2	0.75364		330
25	0.000175408	0.128289	0.996968	2	0.876668		312	0.371338	0.739316	0.0581668	2	0.748066		37	0.0161828	0.0954198	0.41687	3	0.731134		55	0.039403	0.217195	0.274322	4	0.72613		622	0.861995	0.990458	0.00539486	1	0.893164		622	0.561939	0.944785	0.00308497	1	0.889971		235	0.168396	0.507463	0.0401905	2	0.75364		331
26	0.000175408	0.131579	0.996892	2	0.876668		313	0.371338	0.74359	0.0581639	2	0.748066		38	0.0188006	0.0954198	0.392281	3	0.731134		56	0.040597	0.217195	0.273696	4	0.72613		623	0.873082	0.990458	0.0045226	1	0.893164		623	0.562103	0.944785	0.00308395	1	0.889971		236	0.17047	0.507463	0.0398251	2	0.75364		332
27	0.000175408	0.133224	0.996719	2	0.876668		314	0.371689	0.74359	0.0581413	2	0.748066		39	0.0192765	0.0954198	0.385813	3	0.731134		57	0.040597	0.221719	0.272945	4	0.72613		624	0.873082	0.992366	0.00452011	1	0.893164		624	0.562186	0.944785	0.00308347	1	0.889971		237	0.17047	0.512438	0.0398208	2	0.75364		333
28	0.000175408	0.136513	0.996489	2	0.876668		315	0.371689	0.747863	0.0581074	2	0.748066		40	0.0199905	0.0954198	0.372157	3	0.731134		58	0.0441791	0.221719	0.270935	4	0.72613		625	0.89298	0.992366	0.00319116	1	0.893164		625	0.562351	0.944785	0.00308154	1	0.889971		238	0.174101	0.512438	0.0391647	2	0.75364		334
29	0.000175408	0.138158	0.996312	2	0.876668		316	0.372566	0.747863	0.05792	2	0.748066		41	0.0199905	0.0992366	0.368109	3	0.731134		59	0.0441791	0.226244	0.269649	4	0.72613		626	0.89298	0.994275	0.00318796	1	0.893164		626	0.56334	0.944785	0.00307076	1	0.889971		239	0.174101	0.517413	0.0391555	2	0.75364		335
30	0.000175408	0.141447	0.996246	2	0.876668		317	0.372917	0.747863	0.0578942	2	0.748066		42	0.0230842	0.0992366	0.335478	3	0.731134		60	0.0465672	0.226244	0.268581	4	0.72613		627	0.951516	0.994275	0.000780253	1	0.893164		627	0.563504	0.944785	0.00306984	1	0.889971		240	0.175052	0.517413	0.0389834	2	0.75364		336
31	0.000175408	0.143092	0.995924	2	0.876668		318	0.375373	0.747863	0.0573215	2	0.748066		43	0.0230842	0.10687	0.332732	3	0.731134		61	0.0465672	0.230769	0.268164	4	0.72613		628	0.951516	0.996183	0.000777176	1	0.893164		628	0.564164	0.944785	0.00305858	1	0.889971		241	0.175052	0.522388	0.0389796	2	0.75364		337
32	0.000175408	0.146382	0.995904	2	0.876668		319	0.375373	0.752137	0.0572658	2	0.748066		44	0.0242742	0.10687	0.325618	3	0.731134		62	0.0489552	0.230769	0.266432	4	0.72613		629	0.95466	0.996183	0.00072057	1	0.893164		629	0.564164	0.94683	0.00305688	1	0.889971		242	0.176781	0.522388	0.0385478	2	0.75364		338
33	0.000175408	0.148026	0.995753	2	0.876668		320	0.38046	0.752137	0.056398	2	0.748066		45	0.0242742	0.114504	0.319194	3	0.731134		63	0.0489552	0.235294	0.265662	4	0.72613		630	0.95466	0.998092	0.00072036	1	0.893164		630	0.571911	0.94683	0.00294051	1	0.889971		243	0.176781	0.527363	0.0385453	2	0.75364		339
34	0.000350816	0.148026	0.995589	2	0.876668		321	0.38046	0.75641	0.0563168	2	0.748066		46	0.02594	0.114504	0.310769	3	0.731134		64	0.0597015	0.235294	0.255885	4	0.72613		631	0.975551	0.998092	0.00039083	1	0.893164		631	0.571911	0.948875	0.00293694	1	0.889971		244	0.177991	0.527363	0.038058	2	0.75364		340
35	0.000350816	0.159539	0.994515	2	0.876668		322	0.388879	0.75641	0.0545869	2	0.748066		47	0.02594	0.118321	0.30807	3	0.731134		65	0.0597015	0.239819	0.255252	4	0.72613		632	0.975551	1	0.000390646	1	0.893164		632	0.576115	0.948875	0.0028777	1	0.889971		245	0.177991	0.532338	0.0380369	2	0.75364		341
36	0.000350816	0.162829	0.994377	2	0.876668		323	0.388879	0.760684	0.0545346	2	0.748066		48	0.026654	0.118321	0.305191	3	0.731134		66	0.0602985	0.239819	0.254271	4	0.72613		633	1	1	5.08725e-05	1	0.893164		633	0.576115	0.95092	0.0028767	1	0.889971		246	0.179115	0.532338	0.0377885	2	0.75364		342
37	0.000350816	0.177632	0.993214	2	0.876668		324	0.404666	0.760684	0.0514839	2	0.748066		49	0.026654	0.122137	0.30462	3	0.731134		67	0.0602985	0.244344	0.253683	4	0.72613		0	0	0	1.99868	2	0.822148		634	0.576197	0.95092	0.00287606	1	0.889971		247	0.179288	0.532338	0.0377545	2	0.75364		343
38	0.000350816	0.180921	0.9932	2	0.876668		325	0.404666	0.764957	0.0514718	2	0.748066		50	0.0285578	0.122137	0.283798	3	0.731134		68	0.0668657	0.244344	0.251879	4	0.72613		1	0	0.00126422	0.99868	2	0.822148		635	0.576197	0.952965	0.00287522	1	0.889971		248	0.182486	0.532338	0.0370329	2	0.75364		344
39	0.000350816	0.1875	0.992853	2	0.876668		326	0.407648	0.764957	0.0510231	2	0.748066		51	0.0285578	0.125954	0.283514	3	0.731134		69	0.0668657	0.248869	0.250466	4	0.72613		2	0	0.0606827	0.978785	2	0.822148		636	0.579988	0.952965	0.00282512	1	0.889971		249	0.182486	0.537313	0.0370018	2	0.75364		345
40	0.000350816	0.190789	0.992683	2	0.876668		327	0.407648	0.769231	0.0509625	2	0.748066		52	0.0290338	0.125954	0.282119	3	0.731134		70	0.0674627	0.248869	0.250458	4	0.72613		3	4.18305e-05	0.0606827	0.978476	2	0.822148		637	0.580153	0.952965	0.00282195	1	0.889971		250	0.184993	0.537313	0.0364498	2	0.75364		346
41	0.000350816	0.192434	0.992573	2	0.876668		328	0.408876	0.769231	0.05074	2	0.748066		53	0.0290338	0.129771	0.281904	3	0.731134		71	0.0674627	0.253394	0.250457	4	0.72613		4	4.18305e-05	0.145386	0.892664	2	0.822148		638	0.589219	0.952965	0.0027014	1	0.889971		251	0.184993	0.542289	0.0364297	2	0.75364		347
42	0.000350816	0.195724	0.992545	2	0.876668		329	0.408876	0.773504	0.0506982	2	0.748066		54	0.0297477	0.129771	0.275551	3	0.731134		72	0.143881	0.38914	0.25	4	0.72613		5	8.3661e-05	0.145386	0.887287	2	0.822148		639	0.589384	0.952965	0.00269953	1	0.889971		252	0.190785	0.542289	0.0354692	2	0.75364		348
43	0.000350816	0.197368	0.992496	2	0.876668		330	0.409928	0.773504	0.0505212	2	0.748066		55	0.0302237	0.129771	0.275032	3	0.731134		73	0.145672	0.38914	0.249785	4	0.72613		6	8.3661e-05	0.147914	0.883937	2	0.822148		640	0.590209	0.952965	0.00268854	1	0.889971		253	0.190785	0.547264	0.035463	2	0.75364		349
44	0.000350816	0.200658	0.992301	2	0.876668		331	0.409928	0.777778	0.0504815	2	0.748066		56	0.0302237	0.133588	0.274284	3	0.731134		74	0.145672	0.393665	0.249695	4	0.72613		7	0.000125492	0.147914	0.883035	2	0.822148		641	0.590209	0.95501	0.00268668	1	0.889971		254	0.195885	0.547264	0.0345898	2	0.75364		350
45	0.000350816	0.203947	0.99138	2	0.876668		332	0.416418	0.777778	0.0493492	2	0.748066		57	0.0314136	0.133588	0.266582	3	0.731134		75	0.153433	0.393665	0.248555	4	0.72613		8	0.000125492	0.16182	0.84938	2	0.822148		642	0.59606	0.95501	0.00259146	1	0.889971		255	0.196058	0.547264	0.0345787	2	0.75364		351
46	0.000350816	0.207237	0.990976	2	0.876668		333	0.416418	0.782051	0.0493362	2	0.748066		58	0.0314136	0.137405	0.266431	3	0.731134		76	0.153433	0.402715	0.247687	4	0.72613		9	0.000167322	0.16182	0.845505	2	0.822148		643	0.59606	0.957055	0.00259023	1	0.889971		256	0.200467	0.547264	0.0336542	2	0.75364		352
47	0.000350816	0.215461	0.988082	2	0.876668		334	0.419049	0.782051	0.0487663	2	0.748066		59	0.0356973	0.137405	0.254391	3	0.731134		77	0.15403	0.402715	0.247517	4	0.72613		10	0.000167322	0.163085	0.845034	2	0.822148		644	0.599357	0.957055	0.00255094	1	0.889971		257	0.200467	0.552239	0.0336255	2	0.75364		353
48	0.000526223	0.215461	0.98762	2	0.876668		335	0.419049	0.786325	0.0487557	2	0.748066		60	0.0356973	0.141221	0.252552	3	0.731134		78	0.15403	0.40724	0.247509	4	0.72613		11	0.000209153	0.163085	0.840657	2	0.822148		645	0.599357	0.9591	0.00255014	1	0.889971		258	0.200985	0.552239	0.0335931	2	0.75364		354
49	0.000526223	0.233553	0.98307	2	0.876668		336	0.425364	0.786325	0.0475952	2	0.748066		61	0.0366492	0.141221	0.250557	3	0.731134		79	0.154627	0.40724	0.247366	4	0.72613		12	0.000209153	0.165613	0.839015	2	0.822148		646	0.600099	0.9591	0.00254256	1	0.889971		259	0.200985	0.557214	0.0335829	2	0.75364		355
50	0.000701631	0.233553	0.982451	2	0.876668		337	0.425364	0.790598	0.0475549	2	0.748066		62	0.0366492	0.145038	0.248855	3	0.731134		80	0.154627	0.41629	0.247102	4	0.72613		13	0.000250983	0.165613	0.837177	2	0.822148		647	0.600099	0.961145	0.00254041	1	0.889971		260	0.214817	0.557214	0.0313272	2	0.75364		356
51	0.000701631	0.246711	0.978839	2	0.876668		338	0.428346	0.790598	0.0470892	2	0.748066		63	0.0373632	0.145038	0.247604	3	0.731134		81	0.155224	0.41629	0.247022	4	0.72613		14	0.000250983	0.180784	0.804224	2	0.822148		648	0.604467	0.961145	0.00247283	1	0.889971		261	0.214817	0.562189	0.0313169	2	0.75364		357
52	0.000701631	0.25	0.978824	2	0.876668		339	0.428346	0.794872	0.0470793	2	0.748066		64	0.0373632	0.148855	0.246829	3	0.731134		82	0.155224	0.425339	0.246741	4	0.72613		15	0.000292814	0.180784	0.801767	2	0.822148		649	0.604467	0.96319	0.00247273	1	0.889971		262	0.215681	0.562189	0.0311199	2	0.75364		358
53	0.000701631	0.254934	0.975501	2	0.876668		340	0.435713	0.794872	0.0459908	2	0.748066		65	0.0380771	0.148855	0.242624	3	0.731134		83	0.158806	0.425339	0.246221	4	0.72613		16	0.000292814	0.19469	0.765818	2	0.822148		650	0.606116	0.96319	0.00245491	1	0.889971		263	0.215854	0.562189	0.0311071	2	0.75364		359
54	0.000701631	0.258224	0.975409	2	0.876668		341	0.435713	0.799145	0.0459832	2	0.748066		66	0.0380771	0.156489	0.239882	3	0.731134		84	0.158806	0.429864	0.246113	4	0.72613		17	0.000334644	0.19469	0.763318	2	0.822148		651	0.60628	0.96319	0.00245436	1	0.889971		264	0.217324	0.562189	0.0309845	2	0.75364		360
55	0.000701631	0.261513	0.975057	2	0.876668		342	0.439046	0.799145	0.0454384	2	0.748066		67	0.0385531	0.156489	0.238727	3	0.731134		85	0.160597	0.429864	0.24581	4	0.72613		18	0.000334644	0.197219	0.756919	2	0.822148		652	0.608423	0.96319	0.00243585	1	0.889971		265	0.217324	0.567164	0.0309781	2	0.75364		361
56	0.000701631	0.264803	0.97452	2	0.876668		343	0.439046	0.803419	0.0454294	2	0.748066		68	0.0385531	0.160305	0.238441	3	0.731134		86	0.160597	0.434389	0.24575	4	0.72613		19	0.000376475	0.197219	0.756253	2	0.822148		653	0.608588	0.96319	0.00243536	1	0.889971		266	0.21862	0.567164	0.0306558	2	0.75364		362
57	0.000701631	0.269737	0.974123	2	0.876668		344	0.44308	0.803419	0.0447426	2	0.748066		69	0.0404569	0.160305	0.233037	3	0.731134		87	0.167761	0.434389	0.243836	4	0.72613		20	0.000376475	0.206068	0.73751	2	0.822148		654	0.610154	0.96319	0.00241363	1	0.889971		267	0.21862	0.572139	0.0306527	2	0.75364		363
58	0.000877039	0.269737	0.97284	2	0.876668		345	0.44308	0.807692	0.0447412	2	0.748066		70	0.0409329	0.160305	0.231358	3	0.731134		88	0.167761	0.438914	0.243784	4	0.72613		21	0.000460136	0.206068	0.735642	2	0.822148		655	0.610401	0.96319	0.00241196	1	0.889971		268	0.2213	0.572139	0.0301746	2	0.75364		364
59	0.000877039	0.274671	0.971725	2	0.876668		346	0.450623	0.807692	0.0430064	2	0.748066		71	0.0411709	0.160305	0.231065	3	0.731134		89	0.168955	0.438914	0.243461	4	0.72613		22	0.000460136	0.208597	0.731193	2	0.822148		656	0.615759	0.96319	0.0023498	1	0.889971		269	0.2213	0.577114	0.0301631	2	0.75364		365
60	0.000877039	0.284539	0.970929	2	0.876668		347	0.450623	0.811966	0.0429959	2	0.748066		72	0.0411709	0.164122	0.230558	3	0.731134		90	0.168955	0.447964	0.243408	4	0.72613		23	0.000501966	0.208597	0.726651	2	0.822148		657	0.615924	0.96319	0.00234956	1	0.889971		270	0.222683	0.577114	0.0299281	2	0.75364		366
61	0.00105245	0.284539	0.96996	2	0.876668		348	0.453429	0.811966	0.0425161	2	0.748066		73	0.0418848	0.164122	0.226321	3	0.731134		91	0.170149	0.447964	0.243015	4	0.72613		24	0.000501966	0.209861	0.726183	2	0.822148		658	0.618231	0.96319	0.00231452	1	0.889971		271	0.222683	0.58209	0.0299268	2	0.75364		367
62	0.00105245	0.289474	0.964963	2	0.876668		349	0.45378	0.811966	0.0424792	2	0.748066		74	0.0418848	0.167939	0.225522	3	0.731134		92	0.170149	0.452489	0.242883	4	0.72613		25	0.000585627	0.209861	0.721652	2	0.822148		659	0.618396	0.96319	0.00231425	1	0.889971		272	0.223807	0.58209	0.0297961	2	0.75364		368
63	0.00122785	0.289474	0.964848	2	0.876668		350	0.460446	0.811966	0.0413895	2	0.748066		75	0.0423608	0.167939	0.224411	3	0.731134		93	0.170746	0.452489	0.242855	4	0.72613		26	0.000585627	0.214918	0.716011	2	0.822148		660	0.626556	0.96319	0.00223313	1	0.889971		273	0.223807	0.59204	0.0297547	2	0.75364		369
64	0.00122785	0.292763	0.961775	2	0.876668		351	0.460446	0.816239	0.0413483	2	0.748066		76	0.0423608	0.171756	0.224081	3	0.731134		94	0.170746	0.457014	0.242822	4	0.72613		27	0.000627458	0.214918	0.712469	2	0.822148		661	0.626721	0.96319	0.00223308	1	0.889971		274	0.227524	0.59204	0.0290591	2	0.75364		370
65	0.00122785	0.296053	0.960526	2	0.876668		352	0.475706	0.816239	0.0386192	2	0.748066		77	0.0461685	0.171756	0.215369	3	0.731134		95	0.171343	0.457014	0.242542	4	0.72613		28	0.000627458	0.217446	0.702692	2	0.822148		662	0.62771	0.96319	0.00222088	1	0.889971		275	0.227524	0.597015	0.0290246	2	0.75364		371
66	0.00122785	0.297697	0.958657	2	0.876668		353	0.475706	0.820513	0.038615	2	0.748066		78	0.0461685	0.175573	0.214917	3	0.731134		96	0.171343	0.461538	0.242347	4	0.72613		29	0.000711119	0.217446	0.700201	2	0.822148		663	0.627874	0.96319	0.00222076	1	0.889971		276	0.228907	0.597015	0.02885	2	0.75364		372
67	0.00140326	0.297697	0.956048	2	0.876668		354	0.48623	0.820513	0.0367721	2	0.748066		79	0.0504522	0.175573	0.208129	3	0.731134		97	0.176716	0.461538	0.241648	4	0.72613		30	0.000711119	0.223767	0.696171	2	0.822148		664	0.633397	0.96319	0.00216477	1	0.889971		277	0.228907	0.60199	0.0288449	2	0.75364		373
68	0.00140326	0.300987	0.955881	2	0.876668		355	0.48623	0.824786	0.0367662	2	0.748066		80	0.0504522	0.179389	0.207841	3	0.731134		98	0.176716	0.466063	0.241634	4	0.72613		31	0.00079478	0.223767	0.689317	2	0.822148		665	0.633561	0.96319	0.00216322	1	0.889971		278	0.229512	0.60199	0.0287949	2	0.75364		374
69	0.00140326	0.305921	0.952053	2	0.876668		356	0.487458	0.824786	0.0365195	2	0.748066		81	0.0559257	0.179389	0.200524	3	0.731134		99	0.17791	0.466063	0.241269	4	0.72613		32	0.00079478	0.225032	0.687452	2	0.822148		666	0.635869	0.96319	0.00213116	1	0.889971		279	0.229512	0.606965	0.0287667	2	0.75364		375
70	0.00175408	0.305921	0.950882	2	0.876668		357	0.487458	0.82906	0.0365093	2	0.748066		82	0.0559257	0.183206	0.20042	3	0.731134		100	0.17791	0.470588	0.241268	4	0.72613		33	0.00083661	0.225032	0.686793	2	0.822148		667	0.636034	0.96319	0.00213009	1	0.889971		280	0.229858	0.606965	0.0287364	2	0.75364		376
71	0.00175408	0.307566	0.948543	2	0.876668		358	0.495527	0.82906	0.0350534	2	0.748066		83	0.0590195	0.183206	0.195362	3	0.731134		101	0.179104	0.470588	0.241077	4	0.72613		34	0.00083661	0.235145	0.673572	2	0.822148		668	0.6376	0.96319	0.00210919	1	0.889971		281	0.229858	0.61194	0.0286768	2	0.75364		377
72	0.00175408	0.314145	0.947711	2	0.876668		359	0.495878	0.82906	0.035027	2	0.748066		84	0.0590195	0.187023	0.194916	3	0.731134		102	0.179104	0.475113	0.240909	4	0.72613		35	0.000878441	0.235145	0.672192	2	0.822148		669	0.637765	0.96319	0.0021089	1	0.889971		282	0.23297	0.61194	0.0282811	2	0.75364		378
73	0.00175408	0.317434	0.947189	2	0.876668		360	0.499035	0.82906	0.0345794	2	0.748066		85	0.0592575	0.187023	0.194859	3	0.731134		103	0.18209	0.475113	0.240048	4	0.72613		36	0.000878441	0.23641	0.670969	2	0.822148		670	0.638589	0.96319	0.0020985	1	0.889971		283	0.23297	0.616915	0.0282692	2	0.75364		379
74	0.00175408	0.320724	0.946672	2	0.876668		361	0.499386	0.82906	0.0345673	2	0.748066		86	0.0592575	0.19084	0.194479	3	0.731134		104	0.18209	0.479638	0.239574	4	0.72613		37	0.000962102	0.23641	0.657627	2	0.822148		671	0.638754	0.96319	0.00209814	1	0.889971		284	0.235909	0.616915	0.0277662	2	0.75364		380
75	0.00192949	0.320724	0.944426	2	0.876668		362	0.506929	0.82906	0.0334997	2	0.748066		87	0.0630652	0.19084	0.189511	3	0.731134		105	0.186866	0.479638	0.238449	4	0.72613		38	0.000962102	0.237674	0.656829	2	0.822148		672	0.640649	0.96319	0.00208019	1	0.889971		285	0.235909	0.621891	0.0277519	2	0.75364		381
76	0.00192949	0.327303	0.941844	2	0.876668		363	0.507279	0.82906	0.033473	2	0.748066		88	0.0630652	0.198473	0.188005	3	0.731134		106	0.186866	0.484163	0.238428	4	0.72613		39	0.00104576	0.237674	0.655051	2	0.822148		673	0.640814	0.96319	0.00207977	1	0.889971		286	0.23686	0.621891	0.0275885	2	0.75364		382
77	0.00192949	0.335526	0.935978	2	0.876668		364	0.508858	0.82906	0.0333512	2	0.748066		89	0.0633032	0.198473	0.187997	3	0.731134		107	0.189254	0.484163	0.23761	4	0.72613		40	0.00104576	0.238938	0.654801	2	0.822148		674	0.642792	0.96319	0.00205553	1	0.889971		287	0.23686	0.626866	0.0275341	2	0.75364		383
78	0.00192949	0.342105	0.929594	2	0.876668		365	0.508858	0.833333	0.033337	2	0.748066		90	0.0633032	0.20229	0.187633	3	0.731134		108	0.189254	0.488688	0.237555	4	0.72613		41	0.00108759	0.238938	0.654605	2	0.822148		675	0.642957	0.96319	0.00205451	1	0.889971		288	0.239367	0.626866	0.027098	2	0.75364		384
79	0.00192949	0.34375	0.929515	2	0.876668		366	0.512542	0.833333	0.0329318	2	0.748066		91	0.101142	0.312977	0.1875	3	0.731134		109	0.190448	0.488688	0.237206	4	0.72613		42	0.00108759	0.245259	0.648838	2	0.822148		676	0.643534	0.96319	0.00205086	1	0.889971		289	0.239367	0.631841	0.0270937	2	0.75364		385
80	0.0022803	0.34375	0.92856	2	0.876668		367	0.512542	0.837607	0.0329095	2	0.748066		92	0.101618	0.312977	0.187435	3	0.731134		110	0.190448	0.497738	0.236918	4	0.72613		43	0.00112942	0.245259	0.648354	2	0.822148		677	0.643699	0.96319	0.00205041	1	0.889971		290	0.23954	0.631841	0.0270784	2	0.75364		386
81	0.0022803	0.345395	0.928492	2	0.876668		368	0.521487	0.837607	0.0316709	2	0.748066		93	0.101618	0.320611	0.187271	3	0.731134		111	0.195821	0.497738	0.235611	4	0.72613		44	0.00112942	0.246523	0.647867	2	0.822148		678	0.646254	0.96319	0.00201952	1	0.889971		291	0.23954	0.636816	0.0270713	2	0.75364		387
82	0.00245571	0.345395	0.926342	2	0.876668		369	0.521487	0.84188	0.0316627	2	0.748066		94	0.103284	0.320611	0.186829	3	0.731134		112	0.195821	0.502262	0.23548	4	0.72613		45	0.00117125	0.246523	0.646172	2	0.822148		679	0.646254	0.965235	0.00201859	1	0.889971		292	0.24101	0.636816	0.0269092	2	0.75364		388
83	0.00245571	0.351974	0.920632	2	0.876668		370	0.521663	0.84188	0.0316327	2	0.748066		95	0.103284	0.324427	0.186708	3	0.731134		113	0.198806	0.502262	0.23466	4	0.72613		46	0.00117125	0.25158	0.64017	2	0.822148		680	0.6526	0.965235	0.0019569	1	0.889971		293	0.24101	0.641791	0.0268991	2	0.75364		389
84	0.00263112	0.351974	0.916786	2	0.876668		371	0.522014	0.84188	0.0316103	2	0.748066		96	0.104474	0.324427	0.186341	3	0.731134		114	0.2	0.502262	0.234624	4	0.72613		47	0.00133858	0.25158	0.635335	2	0.822148		681	0.652765	0.965235	0.00195653	1	0.889971		294	0.249741	0.641791	0.0257409	2	0.75364		390
85	0.00263112	0.353618	0.916223	2	0.876668		372	0.527978	0.84188	0.0308649	2	0.748066		97	0.104474	0.328244	0.186316	3	0.731134		115	0.203582	0.502262	0.23328	4	0.72613		48	0.00133858	0.252845	0.63286	2	0.822148		682	0.659441	0.965235	0.00188426	1	0.889971		295	0.249741	0.646766	0.0257335	2	0.75364		391
86	0.00280653	0.353618	0.915755	2	0.876668		373	0.527978	0.846154	0.0308266	2	0.748066		98	0.10495	0.328244	0.186001	3	0.731134		116	0.203582	0.506787	0.233247	4	0.72613		49	0.00138041	0.252845	0.631186	2	0.822148		683	0.659606	0.965235	0.00188307	1	0.889971		296	0.255965	0.646766	0.0250381	2	0.75364		392
87	0.00280653	0.358553	0.91144	2	0.876668		374	0.531837	0.846154	0.0300434	2	0.748066		99	0.10495	0.332061	0.185995	3	0.731134		117	0.211343	0.506787	0.229073	4	0.72613		50	0.00138041	0.259166	0.621897	2	0.822148		684	0.660183	0.965235	0.00187766	1	0.889971		297	0.255965	0.651741	0.0249912	2	0.75364		393
88	0.00298193	0.358553	0.911436	2	0.876668		375	0.531837	0.850427	0.0300168	2	0.748066		100	0.105188	0.332061	0.185801	3	0.731134		118	0.211343	0.515837	0.229042	4	0.72613		51	0.00146407	0.259166	0.620489	2	0.822148		685	0.660183	0.96728	0.0018768	1	0.889971		298	0.261324	0.651741	0.0243487	2	0.75364		394
89	0.00298193	0.361842	0.911258	2	0.876668		376	0.547974	0.850427	0.0278543	2	0.748066		101	0.105188	0.335878	0.185792	3	0.731134		119	0.214328	0.515837	0.22853	4	0.72613		52	0.00146407	0.262958	0.618832	2	0.822148		686	0.661172	0.96728	0.00186571	1	0.889971		299	0.261324	0.656716	0.0243477	2	0.75364		395
90	0.00298193	0.363487	0.908351	2	0.876668		377	0.547974	0.854701	0.0278543	2	0.748066		102	0.106378	0.335878	0.18557	3	0.731134		120	0.214328	0.520362	0.228426	4	0.72613		53	0.00163139	0.262958	0.613973	2	0.822148		687	0.661172	0.973415	0.00186553	1	0.889971		300	0.263485	0.656716	0.0240735	2	0.75364		396
91	0.00315734	0.363487	0.908297	2	0.876668		378	0.551833	0.854701	0.0272278	2	0.748066		103	0.106378	0.343511	0.185326	3	0.731134		121	0.232239	0.520362	0.223107	4	0.72613		54	0.00163139	0.265487	0.613266	2	0.822148		688	0.667601	0.973415	0.0017918	1	0.889971		301	0.263831	0.656716	0.0240557	2	0.75364		397
92	0.00315734	0.366776	0.908256	2	0.876668		379	0.551833	0.858974	0.027217	2	0.748066		104	0.10733	0.343511	0.18519	3	0.731134		122	0.232239	0.524887	0.223055	4	0.72613		55	0.00167322	0.265487	0.613232	2	0.822148		689	0.667766	0.973415	0.00178903	1	0.889971		302	0.271438	0.656716	0.023075	2	0.75364		398
93	0.00350816	0.366776	0.902563	2	0.876668		380	0.559902	0.858974	0.026215	2	0.748066		105	0.10733	0.347328	0.18517	3	0.731134		123	0.237015	0.524887	0.221145	4	0.72613		56	0.00167322	0.266751	0.612491	2	0.822148		690	0.671062	0.973415	0.00176737	1	0.889971		303	0.271438	0.661692	0.0230699	2	0.75364		399
94	0.00350816	0.368421	0.901885	2	0.876668		381	0.560253	0.858974	0.0261735	2	0.748066		106	0.107806	0.347328	0.185009	3	0.731134		124	0.237015	0.529412	0.220678	4	0.72613		57	0.00171505	0.266751	0.612316	2	0.822148		691	0.671227	0.973415	0.00176591	1	0.889971		304	0.272216	0.661692	0.0229892	2	0.75364		400
95	0.00368356	0.368421	0.900484	2	0.876668		382	0.563059	0.858974	0.0257781	2	0.748066		107	0.107806	0.354962	0.184989	3	0.731134		125	0.237612	0.529412	0.220148	4	0.72613		58	0.00171505	0.269279	0.610354	2	0.822148		692	0.671969	0.973415	0.00175867	1	0.889971		305	0.272389	0.661692	0.022978	2	0.75364		401
96	0.00368356	0.370066	0.899457	2	0.876668		383	0.563059	0.867521	0.0257552	2	0.748066		108	0.108996	0.354962	0.184666	3	0.731134		126	0.237612	0.533937	0.219572	4	0.72613		59	0.00175688	0.269279	0.607001	2	0.822148		693	0.672134	0.973415	0.0017582	1	0.889971		306	0.273859	0.661692	0.0227396	2	0.75364		402
97	0.00403438	0.370066	0.895647	2	0.876668		384	0.583933	0.867521	0.0234843	2	0.748066		109	0.108996	0.358779	0.184637	3	0.731134		127	0.242985	0.533937	0.217496	4	0.72613		60	0.00175688	0.273072	0.60466	2	0.822148		694	0.672546	0.973415	0.00175439	1	0.889971		307	0.274032	0.661692	0.0226915	2	0.75364		403
98	0.00403438	0.371711	0.891456	2	0.876668		385	0.583933	0.871795	0.0234545	2	0.748066		110	0.110424	0.358779	0.184358	3	0.731134		128	0.242985	0.542986	0.217364	4	0.72613		61	0.00188237	0.273072	0.599358	2	0.822148		695	0.672711	0.973415	0.00175344	1	0.889971		308	0.281985	0.661692	0.0219035	2	0.75364		404
99	0.00403438	0.375	0.889771	2	0.876668		386	0.604631	0.871795	0.0215313	2	0.748066		111	0.110424	0.362595	0.184312	3	0.731134		129	0.24597	0.542986	0.216361	4	0.72613		62	0.00188237	0.275601	0.59908	2	0.822148		696	0.673535	0.973415	0.00174569	1	0.889971		309	0.282158	0.661692	0.0218896	2	0.75364		405
100	0.00403438	0.378289	0.885284	2	0.876668		387	0.604631	0.876068	0.0215113	2	0.748066		112	0.1109	0.362595	0.184199	3	0.731134		130	0.24597	0.547511	0.21635	4	0.72613		63	0.0019242	0.275601	0.597815	2	0.822148		697	0.673535	0.97546	0.00174495	1	0.889971		310	0.294087	0.661692	0.0207979	2	0.75364		406
101	0.00420979	0.378289	0.883493	2	0.876668		388	0.614804	0.876068	0.0205974	2	0.748066		113	0.1109	0.366412	0.184177	3	0.731134		131	0.247761	0.547511	0.215988	4	0.72613		64	0.0019242	0.276865	0.59657	2	0.822148		698	0.676667	0.97546	0.00171897	1	0.889971		311	0.294087	0.666667	0.0207964	2	0.75364		407
102	0.00420979	0.379934	0.878313	2	0.876668		389	0.614804	0.884615	0.0205787	2	0.748066		114	0.115183	0.366412	0.182979	3	0.731134		132	0.247761	0.556561	0.215602	4	0.72613		65	0.00196603	0.276865	0.596045	2	0.822148		699	0.676832	0.97546	0.0017175	1	0.889971		312	0.296594	0.666667	0.0205113	2	0.75364		408
103	0.00420979	0.383224	0.877798	2	0.876668		390	0.620242	0.884615	0.0200064	2	0.748066		115	0.115183	0.370229	0.182838	3	0.731134		133	0.248358	0.556561	0.215267	4	0.72613		66	0.00196603	0.278129	0.591615	2	0.822148		700	0.686392	0.97546	0.00163433	1	0.889971		313	0.296594	0.671642	0.0204936	2	0.75364		409
104	0.00420979	0.388158	0.873147	2	0.876668		391	0.620242	0.888889	0.0200011	2	0.748066		116	0.118277	0.370229	0.181907	3	0.731134		134	0.248358	0.561086	0.215179	4	0.72613		67	0.00204969	0.278129	0.588291	2	0.822148		701	0.686557	0.97546	0.00163419	1	0.889971		314	0.29962	0.671642	0.0202737	2	0.75364		410
105	0.0043852	0.388158	0.872693	2	0.876668		392	0.623399	0.888889	0.0197324	2	0.748066		117	0.118277	0.374046	0.18176	3	0.731134		135	0.251343	0.561086	0.21378	4	0.72613		68	0.00204969	0.280657	0.586862	2	0.822148		702	0.692409	0.97546	0.00158085	1	0.889971		315	0.29962	0.676617	0.0202729	2	0.75364		411
106	0.0043852	0.393092	0.868439	2	0.876668		393	0.623399	0.893162	0.0197069	2	0.748066		118	0.121371	0.374046	0.181236	3	0.731134		136	0.251343	0.565611	0.213763	4	0.72613		69	0.00209153	0.280657	0.586235	2	0.822148		703	0.692574	0.97546	0.00158072	1	0.889971		316	0.301089	0.676617	0.0200882	2	0.75364		412
107	0.00508683	0.393092	0.8609	2	0.876668		394	0.633924	0.893162	0.018812	2	0.748066		119	0.121371	0.377863	0.181225	3	0.731134		137	0.252537	0.565611	0.213651	4	0.72613		70	0.00209153	0.283186	0.585229	2	0.822148		704	0.698014	0.97546	0.0015421	1	0.889971		317	0.301089	0.681592	0.0200847	2	0.75364		413
108	0.00508683	0.394737	0.857162	2	0.876668		395	0.633924	0.897436	0.0188004	2	0.748066		120	0.123751	0.377863	0.18022	3	0.731134		138	0.252537	0.570136	0.213561	4	0.72613		71	0.00213336	0.283186	0.583362	2	0.822148		705	0.698179	0.97546	0.00154188	1	0.889971		318	0.303337	0.681592	0.0199189	2	0.75364		414
109	0.00543764	0.394737	0.853957	2	0.876668		396	0.646553	0.897436	0.0178044	2	0.748066		121	0.124227	0.377863	0.180184	3	0.731134		139	0.254925	0.570136	0.212976	4	0.72613		72	0.00213336	0.286979	0.580696	2	0.822148		706	0.699415	0.97546	0.00153452	1	0.889971		319	0.303337	0.686567	0.0198766	2	0.75364		415
110	0.00543764	0.396382	0.853903	2	0.876668		397	0.646553	0.901709	0.0178037	2	0.748066		122	0.124941	0.377863	0.179921	3	0.731134		140	0.254925	0.574661	0.212906	4	0.72613		73	0.00217519	0.286979	0.580532	2	0.822148		707	0.69958	0.97546	0.0015344	1	0.889971		320	0.309042	0.686567	0.0193344	2	0.75364		416
111	0.00543764	0.399671	0.853789	2	0.876668		398	0.648132	0.901709	0.0176324	2	0.748066		123	0.124941	0.381679	0.17968	3	0.731134		141	0.256119	0.574661	0.212633	4	0.72613		74	0.00217519	0.292035	0.576252	2	0.822148		708	0.701887	0.97546	0.00151629	1	0.889971		321	0.309042	0.691542	0.0193126	2	0.75364		417
112	0.00543764	0.402961	0.850996	2	0.876668		399	0.648132	0.905983	0.017602	2	0.748066		124	0.125178	0.381679	0.179659	3	0.731134		142	0.256119	0.579186	0.21259	4	0.72613		75	0.00234251	0.292035	0.575851	2	0.822148		709	0.702052	0.97546	0.00151588	1	0.889971		322	0.321404	0.691542	0.0183058	2	0.75364		418
113	0.00561305	0.402961	0.849742	2	0.876668		400	0.653745	0.905983	0.0170286	2	0.748066		125	0.125178	0.385496	0.179571	3	0.731134		143	0.266866	0.579186	0.207583	4	0.72613		76	0.00234251	0.295828	0.57358	2	0.822148		710	0.707245	0.97546	0.00146902	1	0.889971		323	0.321404	0.696517	0.0183057	2	0.75364		419
114	0.00561305	0.407895	0.848276	2	0.876668		401	0.653745	0.910256	0.0170254	2	0.748066		126	0.127082	0.385496	0.179044	3	0.731134		144	0.266866	0.58371	0.207225	4	0.72613		77	0.00242617	0.295828	0.572208	2	0.822148		711	0.707245	0.977505	0.00146883	1	0.889971		324	0.32417	0.696517	0.0180752	2	0.75364		420
115	0.00561305	0.411184	0.848254	2	0.876668		402	0.657779	0.910256	0.0166894	2	0.748066		127	0.127082	0.389313	0.179001	3	0.731134		145	0.268657	0.58371	0.207008	4	0.72613		78	0.00242617	0.297092	0.571659	2	0.822148		712	0.709882	0.977505	0.00144526	1	0.889971		325	0.32417	0.701493	0.0180745	2	0.75364		421
116	0.00561305	0.412829	0.847976	2	0.876668		403	0.657779	0.91453	0.0166821	2	0.748066		128	0.128986	0.389313	0.178208	3	0.731134		146	0.268657	0.588235	0.20692	4	0.72613		79	0.00255166	0.297092	0.56936	2	0.822148		713	0.710047	0.977505	0.00144416	1	0.889971		326	0.325553	0.701493	0.0179672	2	0.75364		422
117	0.00596387	0.412829	0.846664	2	0.876668		404	0.675145	0.91453	0.0151323	2	0.748066		129	0.128986	0.39313	0.178167	3	0.731134		147	0.270448	0.588235	0.206009	4	0.72613		80	0.00255166	0.298357	0.5681	2	0.822148		714	0.717959	0.977505	0.00137615	1	0.889971		327	0.325553	0.706468	0.0179609	2	0.75364		423
118	0.00596387	0.416118	0.844277	2	0.876668		405	0.675145	0.918803	0.0151322	2	0.748066		130	0.1297	0.39313	0.177905	3	0.731134		148	0.270448	0.59276	0.205872	4	0.72613		81	0.00259349	0.298357	0.565939	2	0.822148		715	0.718207	0.977505	0.00137514	1	0.889971		328	0.327541	0.706468	0.0177134	2	0.75364		424
119	0.00649009	0.416118	0.840031	2	0.876668		406	0.675496	0.918803	0.0151185	2	0.748066		131	0.1297	0.396947	0.177688	3	0.731134		149	0.272239	0.59276	0.204993	4	0.72613		82	0.00259349	0.299621	0.56333	2	0.822148		716	0.718948	0.977505	0.00136446	1	0.889971		329	0.327714	0.706468	0.0176981	2	0.75364		425
120	0.00684091	0.416118	0.837567	2	0.876668		407	0.675496	0.923077	0.0151078	2	0.748066		132	0.13208	0.396947	0.176579	3	0.731134		150	0.272239	0.597285	0.204976	4	0.72613		83	0.00263532	0.299621	0.563074	2	0.822148		717	0.719113	0.977505	0.00136428	1	0.889971		330	0.32953	0.706468	0.0175527	2	0.75364		426
121	0.00701631	0.416118	0.833055	2	0.876668		408	0.689353	0.923077	0.0141382	2	0.748066		133	0.13208	0.400763	0.17657	3	0.731134		151	0.272836	0.597285	0.204864	4	0.72613		84	0.00263532	0.302149	0.560748	2	0.822148		718	0.720267	0.977505	0.00135736	1	0.889971		331	0.329703	0.706468	0.0175424	2	0.75364		427
122	0.00701631	0.421053	0.824459	2	0.876668		409	0.689353	0.92735	0.0141142	2	0.748066		134	0.134222	0.400763	0.175995	3	0.731134		152	0.272836	0.60181	0.204543	4	0.72613		85	0.00276081	0.302149	0.559522	2	0.822148		719	0.720267	0.97955	0.00135646	1	0.889971		332	0.330567	0.706468	0.0174615	2	0.75364		428
123	0.00736713	0.421053	0.818227	2	0.876668		410	0.695667	0.92735	0.0136698	2	0.748066		135	0.134222	0.408397	0.175802	3	0.731134		153	0.27403	0.60181	0.204289	4	0.72613		86	0.00276081	0.303413	0.558756	2	0.822148		720	0.721009	0.97955	0.00135087	1	0.889971		333	0.330567	0.711443	0.0174494	2	0.75364		429
124	0.00736713	0.424342	0.815803	2	0.876668		411	0.695667	0.931624	0.0136517	2	0.748066		136	0.140409	0.408397	0.17329	3	0.731134		154	0.27403	0.606335	0.203841	4	0.72613		87	0.00280264	0.303413	0.557957	2	0.822148		721	0.721009	0.981595	0.00135027	1	0.889971		334	0.332988	0.711443	0.0172758	2	0.75364		430
125	0.00736713	0.429276	0.805788	2	0.876668		412	0.696018	0.931624	0.0136297	2	0.748066		137	0.140409	0.412214	0.173284	3	0.731134		155	0.275821	0.606335	0.203462	4	0.72613		88	0.00280264	0.304678	0.5573	2	0.822148		722	0.726036	0.981595	0.00130435	1	0.889971		335	0.332988	0.716418	0.0172745	2	0.75364		431
126	0.00754254	0.429276	0.801202	2	0.876668		413	0.696018	0.935897	0.0136158	2	0.748066		138	0.142313	0.412214	0.171796	3	0.731134		156	0.275821	0.61086	0.203328	4	0.72613		89	0.00284447	0.304678	0.556764	2	0.822148		723	0.726201	0.981595	0.00130354	1	0.889971		336	0.336532	0.716418	0.0169869	2	0.75364		432
127	0.00754254	0.432566	0.8011	2	0.876668		414	0.69672	0.935897	0.0135845	2	0.748066		139	0.142313	0.416031	0.171793	3	0.731134		157	0.298507	0.61086	0.192934	4	0.72613		90	0.00284447	0.305942	0.555735	2	0.822148		724	0.729168	0.981595	0.00128578	1	0.889971		337	0.336705	0.716418	0.0169863	2	0.75364		433
128	0.00789335	0.432566	0.799942	2	0.876668		415	0.69672	0.940171	0.0135444	2	0.748066		140	0.143979	0.416031	0.17142	3	0.731134		158	0.298507	0.615385	0.192844	4	0.72613		91	0.0028863	0.305942	0.554323	2	0.822148		725	0.729168	0.98364	0.00128569	1	0.889971		338	0.340681	0.716418	0.0166066	2	0.75364		434
129	0.00789335	0.435855	0.79736	2	0.876668		416	0.697948	0.940171	0.0133839	2	0.748066		141	0.143979	0.419847	0.17132	3	0.731134		159	0.300896	0.615385	0.19031	4	0.72613		92	0.0028863	0.30847	0.554184	2	0.822148		726	0.736586	0.98364	0.00123099	1	0.889971		339	0.340854	0.716418	0.0165992	2	0.75364		435
130	0.00824417	0.435855	0.795296	2	0.876668		417	0.698299	0.940171	0.0133824	2	0.748066		142	0.149215	0.419847	0.168922	3	0.731134		160	0.300896	0.61991	0.190291	4	0.72613		93	0.00292814	0.30847	0.553061	2	0.822148		727	0.736751	0.98364	0.00122723	1	0.889971		340	0.342497	0.716418	0.0164937	2	0.75364		0
131	0.00824417	0.4375	0.794109	2	0.876668		418	0.703912	0.940171	0.0129135	2	0.748066		143	0.149215	0.423664	0.168852	3	0.731134		161	0.30806	0.61991	0.188537	4	0.72613		94	0.00292814	0.310999	0.552277	2	0.822148		728	0.737493	0.98364	0.00122122	1	0.889971		341	0.342497	0.721393	0.0164878	2	0.75364		1
132	0.00859498	0.4375	0.790663	2	0.876668		419	0.704262	0.940171	0.0129032	2	0.748066		144	0.15683	0.423664	0.165674	3	0.731134		162	0.30806	0.624434	0.188517	4	0.72613		95	0.00305363	0.310999	0.551713	2	0.822148		729	0.737658	0.98364	0.0012196	1	0.889971		342	0.350622	0.721393	0.0158021	2	0.75364		2
133	0.00859498	0.439145	0.790022	2	0.876668		420	0.729521	0.940171	0.0112334	2	0.748066		145	0.15683	0.435115	0.165229	3	0.731134		163	0.317015	0.624434	0.185572	4	0.72613		96	0.00305363	0.313527	0.55077	2	0.822148		730	0.744086	0.98364	0.00117179	1	0.889971		343	0.350622	0.726368	0.0157988	2	0.75364		3
134	0.00877039	0.439145	0.782062	2	0.876668		421	0.729521	0.944444	0.0112251	2	0.748066		146	0.165635	0.435115	0.161981	3	0.731134		164	0.317015	0.628959	0.18515	4	0.72613		97	0.00313729	0.313527	0.550076	2	0.822148		731	0.744251	0.98364	0.0011717	1	0.889971		344	0.354858	0.726368	0.0155413	2	0.75364		4
135	0.00877039	0.440789	0.779594	2	0.876668		422	0.740923	0.944444	0.0105525	2	0.748066		147	0.165635	0.442748	0.161701	3	0.731134		165	0.321194	0.628959	0.183803	4	0.72613		98	0.00313729	0.31732	0.548849	2	0.822148		732	0.746889	0.98364	0.00115933	1	0.889971		345	0.355031	0.726368	0.0155367	2	0.75364		5
136	0.0089458	0.440789	0.779373	2	0.876668		423	0.741449	0.944444	0.0105485	2	0.748066		148	0.166349	0.442748	0.161541	3	0.731134		166	0.321194	0.633484	0.183725	4	0.72613		99	0.00330461	0.31732	0.545364	2	0.822148		733	0.747053	0.98364	0.00115884	1	0.889971		346	0.35823	0.726368	0.0153784	2	0.75364		6
137	0.00929661	0.440789	0.778881	2	0.876668		424	0.748991	0.944444	0.0100642	2	0.748066		149	0.166349	0.450382	0.161385	3	0.731134		167	0.324776	0.633484	0.180724	4	0.72613		100	0.00330461	0.319848	0.543849	2	0.822148		734	0.747301	0.98364	0.0011574	1	0.889971		347	0.358402	0.726368	0.0153704	2	0.75364		7
138	0.00929661	0.444079	0.75924	2	0.876668		425	0.748991	0.948718	0.0100633	2	0.748066		150	0.168491	0.450382	0.160335	3	0.731134		168	0.324776	0.642534	0.180554	4	0.72613		101	0.00334644	0.319848	0.543228	2	0.822148		735	0.747301	0.985685	0.00115566	1	0.889971		348	0.359613	0.726368	0.0152368	2	0.75364		8
139	0.00982284	0.444079	0.74312	2	0.876668		426	0.757937	0.948718	0.00952215	2	0.748066		151	0.168491	0.454198	0.160322	3	0.731134		169	0.327164	0.642534	0.179917	4	0.72613		102	0.00334644	0.324905	0.541669	2	0.822148		736	0.751092	0.985685	0.00112807	1	0.889971		349	0.359613	0.731343	0.015232	2	0.75364		9
140	0.00982284	0.445724	0.741555	2	0.876668		427	0.757937	0.952991	0.00952003	2	0.748066		152	0.170157	0.454198	0.159812	3	0.731134		170	0.327164	0.647059	0.179645	4	0.72613		103	0.00351376	0.324905	0.539968	2	0.822148		737	0.751257	0.985685	0.00112715	1	0.889971		350	0.359959	0.731343	0.0151906	2	0.75364		10
141	0.0106999	0.445724	0.730358	2	0.876668		428	0.759867	0.952991	0.0093508	2	0.748066		153	0.170157	0.458015	0.15968	3	0.731134		171	0.336119	0.647059	0.176007	4	0.72613		104	0.00351376	0.327434	0.537753	2	0.822148		738	0.767823	0.985685	0.00100708	1	0.889971		351	0.359959	0.736318	0.0151884	2	0.75364		11
142	0.0106999	0.449013	0.729381	2	0.876668		429	0.759867	0.957265	0.00934644	2	0.748066		154	0.170633	0.458015	0.15959	3	0.731134		172	0.336119	0.651584	0.175603	4	0.72613		105	0.00355559	0.327434	0.537732	2	0.822148		739	0.767988	0.985685	0.00100651	1	0.889971		352	0.360996	0.736318	0.015121	2	0.75364		12
143	0.0108753	0.449013	0.726307	2	0.876668		430	0.764778	0.957265	0.00914757	2	0.748066		155	0.170633	0.465649	0.159443	3	0.731134		173	0.351642	0.651584	0.168766	4	0.72613		106	0.00355559	0.328698	0.536712	2	0.822148		740	0.779609	0.985685	0.000920576	1	0.889971		353	0.360996	0.741294	0.0151105	2	0.75364		13
144	0.0108753	0.450658	0.722073	2	0.876668		431	0.764778	0.961538	0.00913518	2	0.748066		156	0.170871	0.465649	0.159393	3	0.731134		174	0.351642	0.656109	0.168675	4	0.72613		107	0.00359742	0.328698	0.535778	2	0.822148		741	0.779774	0.985685	0.00092033	1	0.889971		354	0.371802	0.741294	0.0144991	2	0.75364		14
145	0.0110507	0.450658	0.719229	2	0.876668		432	0.773724	0.961538	0.00855286	2	0.748066		157	0.171347	0.465649	0.159222	3	0.731134		175	0.356418	0.656109	0.1667	4	0.72613		108	0.00359742	0.329962	0.53575	2	0.822148		742	0.793373	0.985685	0.000840102	1	0.889971		355	0.371802	0.746269	0.014498	2	0.75364		15
146	0.0110507	0.453947	0.711012	2	0.876668		433	0.773724	0.965812	0.0084985	2	0.748066		158	0.180866	0.465649	0.155196	3	0.731134		176	0.356418	0.660633	0.166641	4	0.72613		109	0.0039739	0.329962	0.532137	2	0.822148		743	0.793703	0.985685	0.000838316	1	0.889971		356	0.372061	0.746269	0.0144572	2	0.75364		16
147	0.0114015	0.453947	0.703536	2	0.876668		434	0.794422	0.965812	0.00742622	2	0.748066		159	0.180866	0.469466	0.15519	3	0.731134		177	0.370746	0.660633	0.162138	4	0.72613		110	0.0039739	0.331226	0.532119	2	0.822148		744	0.794939	0.985685	0.000832853	1	0.889971		357	0.372061	0.751244	0.0144533	2	0.75364		17
148	0.0114015	0.457237	0.695893	2	0.876668		435	0.794422	0.970085	0.00742616	2	0.748066		160	0.182532	0.469466	0.154618	3	0.731134		178	0.370746	0.665158	0.161992	4	0.72613		111	0.00401573	0.331226	0.531408	2	0.822148		745	0.795104	0.985685	0.000832819	1	0.889971		358	0.372407	0.751244	0.014404	2	0.75364		18
149	0.0117523	0.457237	0.695352	2	0.876668		436	0.803368	0.970085	0.00700333	2	0.748066		161	0.182532	0.473282	0.154589	3	0.731134		179	0.376716	0.665158	0.160031	4	0.72613		112	0.00401573	0.332491	0.530817	2	0.822148		746	0.807962	0.985685	0.000758123	1	0.889971		359	0.372407	0.756219	0.0143991	2	0.75364		19
150	0.0119277	0.457237	0.694771	2	0.876668		437	0.803368	0.974359	0.00698363	2	0.748066		162	0.183246	0.473282	0.154554	3	0.731134		180	0.376716	0.669683	0.159837	4	0.72613		113	0.00422488	0.332491	0.528858	2	0.822148		747	0.808127	0.985685	0.000758033	1	0.889971		360	0.376124	0.756219	0.0141985	2	0.75364		20
151	0.0119277	0.458882	0.690882	2	0.876668		438	0.829854	0.974359	0.00581057	2	0.748066		163	0.183246	0.477099	0.154404	3	0.731134		181	0.382687	0.669683	0.158634	4	0.72613		114	0.00422488	0.333755	0.528738	2	0.822148		748	0.80961	0.985685	0.000747633	1	0.889971		361	0.376297	0.756219	0.0141687	2	0.75364		21
152	0.0121031	0.458882	0.689936	2	0.876668		439	0.829854	0.978632	0.00578646	2	0.748066		164	0.188482	0.477099	0.152597	3	0.731134		182	0.382687	0.678733	0.158338	4	0.72613		115	0.00435037	0.333755	0.528022	2	0.822148		749	0.80961	0.98773	0.000747328	1	0.889971		362	0.376729	0.756219	0.0141417	2	0.75364		22
153	0.0121031	0.460526	0.689608	2	0.876668		440	0.84073	0.978632	0.00524868	2	0.748066		165	0.188482	0.480916	0.152496	3	0.731134		183	0.389254	0.678733	0.156675	4	0.72613		116	0.00435037	0.337547	0.526587	2	0.822148		750	0.813731	0.98773	0.000729141	1	0.889971		363	0.376902	0.756219	0.0141346	2	0.75364		23
154	0.0122785	0.460526	0.688641	2	0.876668		441	0.841081	0.978632	0.0052441	2	0.748066		166	0.189196	0.480916	0.152089	3	0.731134		184	0.389254	0.683258	0.156669	4	0.72613		117	0.0043922	0.337547	0.52658	2	0.822148		751	0.813731	0.989775	0.000729059	1	0.889971		364	0.377593	0.756219	0.0140958	2	0.75364		24
155	0.0122785	0.462171	0.684949	2	0.876668		442	0.854061	0.978632	0.00476785	2	0.748066		167	0.189196	0.484733	0.151894	3	0.731134		185	0.398209	0.683258	0.152605	4	0.72613		118	0.0043922	0.338812	0.526221	2	0.822148		752	0.826424	0.989775	0.00065955	1	0.889971		365	0.377593	0.761194	0.014092	2	0.75364		25
156	0.0128048	0.462171	0.67922	2	0.876668		443	0.854061	0.982906	0.00476136	2	0.748066		168	0.192765	0.484733	0.150133	3	0.731134		186	0.398209	0.687783	0.152563	4	0.72613		119	0.00447586	0.338812	0.525356	2	0.822148		753	0.826589	0.989775	0.000659322	1	0.889971		366	0.377939	0.761194	0.0140715	2	0.75364		26
157	0.0128048	0.463816	0.659106	2	0.876668		444	0.860726	0.982906	0.0044722	2	0.748066		169	0.192765	0.48855	0.150069	3	0.731134		187	0.406567	0.687783	0.150953	4	0.72613		120	0.00447586	0.342604	0.524483	2	0.822148		754	0.845957	0.989775	0.000560462	1	0.889971		367	0.378112	0.761194	0.014071	2	0.75364		27
158	0.0131556	0.463816	0.65352	2	0.876668		445	0.861077	0.982906	0.00446672	2	0.748066		170	0.195859	0.48855	0.148491	3	0.731134		188	0.406567	0.692308	0.150932	4	0.72613		121	0.00451769	0.342604	0.524457	2	0.822148		755	0.846122	0.989775	0.000560113	1	0.889971		368	0.383212	0.761194	0.0137151	2	0.75364		28
159	0.0131556	0.465461	0.650798	2	0.876668		446	0.880196	0.982906	0.00372399	2	0.748066		171	0.195859	0.492366	0.14835	3	0.731134		189	0.409552	0.692308	0.150224	4	0.72613		122	0.00451769	0.345133	0.524149	2	0.822148		756	0.85593	0.989775	0.000511578	1	0.889971		369	0.383212	0.766169	0.0137087	2	0.75364		29
160	0.0131556	0.472039	0.643919	2	0.876668		447	0.880196	0.987179	0.00372282	2	0.748066		172	0.202047	0.492366	0.144679	3	0.731134		190	0.409552	0.696833	0.150161	4	0.72613		123	0.00468502	0.345133	0.522884	2	0.822148		757	0.856095	0.989775	0.00051123	1	0.889971		370	0.384423	0.766169	0.0136053	2	0.75364		30
161	0.013331	0.472039	0.637146	2	0.876668		448	0.973163	0.987179	0.000693053	2	0.748066		173	0.202047	0.496183	0.144633	3	0.731134		191	0.410149	0.696833	0.150127	4	0.72613		124	0.00468502	0.346397	0.522843	2	0.822148		758	0.858073	0.989775	0.00050326	1	0.889971		371	0.384595	0.766169	0.0136035	2	0.75364		31
162	0.013331	0.475329	0.635146	2	0.876668		449	0.973163	0.991453	0.00069295	2	0.748066		174	0.202523	0.496183	0.144193	3	0.731134		192	0.410149	0.701357	0.150093	4	0.72613		125	0.00476868	0.346397	0.522277	2	0.822148		759	0.858238	0.989775	0.000503217	1	0.889971		372	0.387362	0.766169	0.0134009	2	0.75364		32
163	0.013331	0.476974	0.632931	2	0.876668		450	0.97632	0.991453	0.000637946	2	0.748066		175	0.202523	0.5	0.144048	3	0.731134		193	0.410746	0.701357	0.149502	4	0.72613		126	0.00476868	0.348925	0.521534	2	0.822148		760	0.860051	0.989775	0.000494054	1	0.889971		373	0.387362	0.771144	0.0134008	2	0.75364		33
164	0.013331	0.480263	0.630826	2	0.876668		451	0.97632	0.995726	0.000635909	2	0.748066		176	0.202999	0.5	0.143957	3	0.731134		194	0.410746	0.705882	0.149385	4	0.72613		127	0.00501966	0.348925	0.51911	2	0.822148		761	0.860051	0.99182	0.000493961	1	0.889971		374	0.387621	0.771144	0.0133967	2	0.75364		34
165	0.0135064	0.480263	0.62783	2	0.876668		452	0.976846	0.995726	0.000626766	2	0.748066		177	0.202999	0.503817	0.143945	3	0.731134		195	0.412537	0.705882	0.149063	4	0.72613		128	0.00501966	0.351454	0.518987	2	0.822148		762	0.868952	0.99182	0.000458499	1	0.889971		375	0.387621	0.776119	0.0133901	2	0.75364		35
166	0.0135064	0.483553	0.625674	2	0.876668		453	0.976846	1	0.000625297	2	0.748066		178	0.208472	0.503817	0.141604	3	0.731134		196	0.412537	0.710407	0.148998	4	0.72613		129	0.00527064	0.351454	0.516991	2	0.822148		763	0.869117	0.99182	0.00045839	1	0.889971		376	0.390647	0.776119	0.0132271	2	0.75364		36
167	0.0136818	0.483553	0.620948	2	0.876668		454	0.985792	1	0.000437518	2	0.748066		179	0.208948	0.503817	0.141549	3	0.731134		197	0.416119	0.710407	0.148001	4	0.72613		130	0.00527064	0.353982	0.516817	2	0.822148		764	0.879008	0.99182	0.000418961	1	0.889971		377	0.39082	0.776119	0.0132219	2	0.75364		37
168	0.0136818	0.486842	0.620482	2	0.876668		455	0.986143	1	0.000435882	2	0.748066		180	0.209186	0.503817	0.14151	3	0.731134		198	0.416119	0.714932	0.147788	4	0.72613		131	0.0053543	0.353982	0.515263	2	0.822148		765	0.879173	0.99182	0.000418856	1	0.889971		378	0.397044	0.776119	0.0128471	2	0.75364		38
169	0.0147343	0.486842	0.601723	2	0.876668		456	1	1	4.96177e-05	2	0.748066		181	0.209186	0.507634	0.141388	3	0.731134		199	0.421493	0.714932	0.146186	4	0.72613		132	0.0053543	0.355247	0.514965	2	0.822148		766	0.895904	0.99182	0.000344346	1	0.889971		379	0.397044	0.781095	0.0128432	2	0.75364		39
170	0.0147343	0.488487	0.59858	2	0.876668		0	0	0	1.99985	3	0.746653		182	0.216564	0.507634	0.137852	3	0.731134		200	0.421493	0.719457	0.14611	4	0.72613		133	0.00539613	0.355247	0.514956	2	0.822148		767	0.895904	0.993865	0.000343864	1	0.889971		380	0.397649	0.781095	0.0128033	2	0.75364		40
171	0.0150851	0.488487	0.594107	2	0.876668		1	0	0.00303951	0.999847	3	0.746653		183	0.216564	0.51145	0.137794	3	0.731134		201	0.422687	0.719457	0.145662	4	0.72613		134	0.00539613	0.357775	0.514231	2	0.822148		768	0.903486	0.993865	0.000314397	1	0.889971		381	0.397822	0.781095	0.0128032	2	0.75364		41
172	0.0150851	0.491776	0.590497	2	0.876668		2	0	0.00911854	0.999422	3	0.746653		184	0.218229	0.51145	0.137036	3	0.731134		202	0.422687	0.723982	0.145023	4	0.72613		135	0.0054798	0.357775	0.513756	2	0.822148		769	0.903486	0.99591	0.000314263	1	0.889971		382	0.398167	0.781095	0.0127931	2	0.75364		42
173	0.0157867	0.491776	0.582049	2	0.876668		3	0	0.0121581	0.998779	3	0.746653		185	0.218229	0.515267	0.136912	3	0.731134		203	0.423881	0.723982	0.144852	4	0.72613		136	0.0054798	0.359039	0.512544	2	0.822148		770	0.917827	0.99591	0.000259604	1	0.889971		383	0.39834	0.781095	0.0127913	2	0.75364		43
174	0.0157867	0.495066	0.579161	2	0.876668		4	0	0.0182371	0.998641	3	0.746653		186	0.220133	0.515267	0.135543	3	0.731134		204	0.423881	0.728507	0.144243	4	0.72613		137	0.00552163	0.359039	0.511978	2	0.822148		771	0.917992	0.99591	0.000259483	1	0.889971		384	0.408714	0.781095	0.0121393	2	0.75364		44
175	0.0159621	0.495066	0.57877	2	0.876668		5	0.000204666	0.0182371	0.99778	3	0.746653		187	0.220133	0.519084	0.135519	3	0.731134		205	0.431045	0.728507	0.141232	4	0.72613		138	0.00552163	0.360303	0.51112	2	0.822148		772	0.929943	0.99591	0.000222957	1	0.889971		385	0.408887	0.781095	0.0121374	2	0.75364		45
176	0.0159621	0.496711	0.575305	2	0.876668		6	0.000204666	0.0364742	0.989712	3	0.746653		188	0.221085	0.519084	0.134938	3	0.731134		206	0.431045	0.733032	0.141178	4	0.72613		139	0.00568895	0.360303	0.509789	2	0.822148		773	0.930108	0.99591	0.000222805	1	0.889971		386	0.41001	0.781095	0.012099	2	0.75364		46
177	0.0161375	0.496711	0.566056	2	0.876668		7	0.000613999	0.0364742	0.983681	3	0.746653		189	0.221085	0.522901	0.134734	3	0.731134		207	0.433433	0.733032	0.140478	4	0.72613		140	0.00568895	0.361568	0.509404	2	0.822148		774	0.953762	0.99591	0.000150569	1	0.889971		387	0.41001	0.78607	0.0120899	2	0.75364		47
178	0.0161375	0.498355	0.565752	2	0.876668		8	0.000613999	0.0425532	0.974744	3	0.746653		190	0.227749	0.522901	0.131492	3	0.731134		208	0.433433	0.742081	0.140133	4	0.72613		141	0.00577261	0.361568	0.508405	2	0.822148		775	0.953762	0.997955	0.000150416	1	0.889971		388	0.416148	0.78607	0.0118418	2	0.75364		48
179	0.0163129	0.498355	0.564377	2	0.876668		9	0.000818666	0.0425532	0.971756	3	0.746653		191	0.227749	0.526718	0.131396	3	0.731134		209	0.447761	0.742081	0.136	4	0.72613		142	0.00577261	0.364096	0.508266	2	0.822148		776	0.954339	0.997955	0.000148932	1	0.889971		389	0.416321	0.78607	0.0118318	2	0.75364		49
180	0.0163129	0.5	0.564216	2	0.876668		10	0.000818666	0.0455927	0.971495	3	0.746653		192	0.228701	0.526718	0.130765	3	0.731134		210	0.447761	0.746606	0.135343	4	0.72613		143	0.00602359	0.364096	0.506849	2	0.822148		777	0.954504	0.997955	0.000148536	1	0.889971		390	0.416753	0.78607	0.0118077	2	0.75364		50
181	0.0164883	0.5	0.559501	2	0.876668		11	0.00102333	0.0455927	0.966936	3	0.746653		193	0.228701	0.530534	0.130729	3	0.731134		211	0.448955	0.746606	0.135255	4	0.72613		144	0.00602359	0.36536	0.506418	2	0.822148		778	0.965961	0.997955	0.00011196	1	0.889971		391	0.416753	0.791045	0.0118054	2	0.75364		51
182	0.0164883	0.501645	0.556788	2	0.876668		12	0.00102333	0.0486322	0.958386	3	0.746653		194	0.229415	0.530534	0.130436	3	0.731134		212	0.450149	0.746606	0.134399	4	0.72613		145	0.00631641	0.36536	0.504283	2	0.822148		779	0.966125	0.997955	0.000111451	1	0.889971		392	0.423842	0.791045	0.0114395	2	0.75364		52
183	0.0166637	0.501645	0.556527	2	0.876668		13	0.00143266	0.0486322	0.953627	3	0.746653		195	0.229415	0.534351	0.13039	3	0.731134		213	0.454328	0.746606	0.133214	4	0.72613		146	0.00631641	0.366625	0.504129	2	0.822148		780	0.967444	0.997955	0.000108289	1	0.889971		393	0.424015	0.791045	0.0114368	2	0.75364		53
184	0.0166637	0.503289	0.55036	2	0.876668		14	0.00143266	0.0547112	0.951305	3	0.746653		196	0.230129	0.534351	0.130289	3	0.731134		214	0.454328	0.751131	0.132978	4	0.72613		147	0.00635824	0.366625	0.503686	2	0.822148		781	0.967609	0.997955	0.000108104	1	0.889971		394	0.42825	0.791045	0.0112453	2	0.75364		54
185	0.0168392	0.503289	0.550199	2	0.876668		15	0.00163733	0.0547112	0.946196	3	0.746653		197	0.230129	0.538168	0.130034	3	0.731134		215	0.45791	0.751131	0.132024	4	0.72613		148	0.00635824	0.369153	0.503566	2	0.822148		782	0.971318	0.997955	9.90077e-05	1	0.889971		395	0.428423	0.791045	0.0112362	2	0.75364		55
186	0.0168392	0.504934	0.538081	2	0.876668		16	0.00163733	0.0577508	0.942432	3	0.746653		198	0.231318	0.538168	0.129523	3	0.731134		216	0.45791	0.755656	0.132008	4	0.72613		149	0.0064419	0.369153	0.503377	2	0.822148		783	0.971483	0.997955	9.83913e-05	1	0.889971		396	0.430152	0.791045	0.0111351	2	0.75364		56
187	0.01719	0.504934	0.531778	2	0.876668		17	0.00163733	0.0638298	0.933406	3	0.746653		199	0.231318	0.541985	0.129514	3	0.731134		217	0.461493	0.755656	0.130891	4	0.72613		150	0.0064419	0.370417	0.503171	2	0.822148		784	0.97923	0.997955	7.04717e-05	1	0.889971		397	0.430152	0.79602	0.0111288	2	0.75364		57
188	0.01719	0.508224	0.526889	2	0.876668		18	0.00204666	0.0638298	0.932024	3	0.746653		200	0.235126	0.541985	0.128357	3	0.731134		218	0.461493	0.764706	0.130417	4	0.72613		151	0.00648373	0.370417	0.503144	2	0.822148		785	0.979395	0.997955	6.98714e-05	1	0.889971		398	0.430498	0.79602	0.0111124	2	0.75364		58
189	0.0175408	0.508224	0.522841	2	0.876668		19	0.00266066	0.0638298	0.920711	3	0.746653		201	0.235126	0.545802	0.128262	3	0.731134		219	0.470448	0.764706	0.126945	4	0.72613		152	0.00648373	0.37421	0.502712	2	0.822148		786	0.986401	0.997955	5.14922e-05	1	0.889971		399	0.430498	0.800995	0.0111102	2	0.75364		59
190	0.0175408	0.509868	0.522652	2	0.876668		20	0.00266066	0.0668693	0.918675	3	0.746653		202	0.236554	0.545802	0.127649	3	0.731134		220	0.470448	0.778281	0.126135	4	0.72613		153	0.00652556	0.37421	0.502665	2	0.822148		787	0.986401	1	5.14909e-05	1	0.889971		400	0.430757	0.800995	0.0110967	2	0.75364		60
191	0.0187686	0.509868	0.497223	2	0.876668		21	0.00307	0.0668693	0.912439	3	0.746653		203	0.236554	0.549618	0.127527	3	0.731134		221	0.473433	0.778281	0.124047	4	0.72613		154	0.00652556	0.375474	0.502273	2	0.822148		788	1	1	1.05422e-07	1	0.889971		401	0.430757	0.80597	0.0110903	2	0.75364		61
192	0.0187686	0.511513	0.492746	2	0.876668		22	0.00307	0.0699088	0.908893	3	0.746653		204	0.240838	0.549618	0.126573	3	0.731134		222	0.473433	0.782805	0.124033	4	0.72613		155	0.00660922	0.375474	0.501588	2	0.822148		0	0	0	1.9998	2	0.866072		402	0.444416	0.80597	0.0103666	2	0.75364		62
193	0.0199965	0.511513	0.473003	2	0.876668		23	0.00470733	0.0699088	0.866549	3	0.746653		205	0.240838	0.553435	0.126506	3	0.731134		223	0.474627	0.782805	0.123315	4	0.72613		156	0.00660922	0.376738	0.501399	2	0.822148		1	0	0.0017094	0.999796	2	0.866072		403	0.444416	0.810945	0.0103666	2	0.75364		63
194	0.0199965	0.514803	0.466668	2	0.876668		24	0.00511666	0.0699088	0.864389	3	0.746653		206	0.241076	0.553435	0.126233	3	0.731134		224	0.474627	0.78733	0.12324	4	0.72613		157	0.00665105	0.376738	0.501331	2	0.822148		2	0	0.00512821	0.999232	2	0.866072		404	0.461964	0.810945	0.00955679	2	0.75364		64
195	0.0205227	0.514803	0.45502	2	0.876668		25	0.00511666	0.0729483	0.861802	3	0.746653		207	0.241076	0.557252	0.126199	3	0.731134		225	0.476418	0.78733	0.122762	4	0.72613		158	0.00665105	0.378003	0.501047	2	0.822148		3	0	0.017094	0.997743	2	0.866072		405	0.461964	0.81592	0.00955195	2	0.75364		65
196	0.0205227	0.516447	0.453574	2	0.876668		26	0.00511666	0.0851064	0.854581	3	0.746653		208	0.243455	0.557252	0.125067	3	0.731134		226	0.476418	0.791855	0.122701	4	0.72613		159	0.00698569	0.378003	0.499584	2	0.822148		4	0	0.0273504	0.996277	2	0.866072		406	0.465854	0.81592	0.00937091	2	0.75364		66
197	0.0206981	0.516447	0.448922	2	0.876668		27	0.00511666	0.0881459	0.854402	3	0.746653		209	0.243455	0.561069	0.125027	3	0.731134		227	0.478806	0.791855	0.122054	4	0.72613		160	0.00698569	0.379267	0.499533	2	0.822148		5	0	0.0512821	0.991929	2	0.866072		407	0.465854	0.820896	0.00937065	2	0.75364		67
198	0.0206981	0.518092	0.448069	2	0.876668		28	0.00573066	0.0881459	0.849971	3	0.746653		210	0.254879	0.561069	0.121504	3	0.731134		228	0.478806	0.79638	0.121635	4	0.72613		161	0.00727851	0.379267	0.497412	2	0.822148		6	0	0.0615385	0.990217	2	0.866072		408	0.467151	0.820896	0.00933391	2	0.75364		68
199	0.0208735	0.518092	0.446858	2	0.876668		29	0.00613999	0.0881459	0.847712	3	0.746653		211	0.254879	0.564885	0.121494	3	0.731134		229	0.479403	0.79638	0.121106	4	0.72613		162	0.00727851	0.380531	0.496821	2	0.822148		7	0	0.0649573	0.989218	2	0.866072		409	0.467151	0.825871	0.00932643	2	0.75364		69
200	0.0208735	0.521382	0.442867	2	0.876668		30	0.00634466	0.0881459	0.84498	3	0.746653		212	0.257972	0.564885	0.120753	3	0.731134		230	0.479403	0.800905	0.120964	4	0.72613		163	0.00736217	0.380531	0.496622	2	0.822148		8	0	0.0683761	0.98768	2	0.866072		410	0.467756	0.825871	0.00928533	2	0.75364		70
201	0.021926	0.521382	0.43919	2	0.876668		31	0.00675399	0.0881459	0.84409	3	0.746653		213	0.257972	0.568702	0.120587	3	0.731134		231	0.481194	0.800905	0.120459	4	0.72613		164	0.00736217	0.381795	0.496474	2	0.822148		9	0	0.0717949	0.985744	2	0.866072		411	0.467929	0.825871	0.00928151	2	0.75364		71
202	0.021926	0.524671	0.434792	2	0.876668		32	0.00695866	0.0881459	0.842599	3	0.746653		214	0.260114	0.568702	0.119871	3	0.731134		232	0.481194	0.809955	0.119991	4	0.72613		165	0.00744583	0.381795	0.496431	2	0.822148		10	8.40336e-05	0.0717949	0.985369	2	0.866072		412	0.483402	0.825871	0.00860216	2	0.75364		72
203	0.021926	0.527961	0.434677	2	0.876668		33	0.00736799	0.0881459	0.830824	3	0.746653		215	0.260114	0.572519	0.119726	3	0.731134		233	0.488955	0.809955	0.117455	4	0.72613		166	0.00744583	0.388116	0.494887	2	0.822148		11	8.40336e-05	0.0871795	0.979219	2	0.866072		413	0.483402	0.830846	0.0085996	2	0.75364		73
204	0.0221014	0.527961	0.432084	2	0.876668		34	0.00757266	0.0881459	0.812422	3	0.746653		216	0.262256	0.572519	0.119322	3	0.731134		234	0.488955	0.81448	0.117443	4	0.72613		167	0.00769681	0.388116	0.491484	2	0.822148		12	8.40336e-05	0.0905983	0.979009	2	0.866072		414	0.485996	0.830846	0.00852326	2	0.75364		74
205	0.0221014	0.53125	0.430304	2	0.876668		35	0.00757266	0.0911854	0.811834	3	0.746653		217	0.262256	0.576336	0.119295	3	0.731134		235	0.494328	0.81448	0.116039	4	0.72613		168	0.00769681	0.390645	0.490699	2	0.822148		13	8.40336e-05	0.0923077	0.978682	2	0.866072		415	0.485996	0.835821	0.0085197	2	0.75364		75
206	0.0224522	0.53125	0.417525	2	0.876668		36	0.00818666	0.0911854	0.805339	3	0.746653		218	0.263684	0.576336	0.118976	3	0.731134		236	0.494328	0.819005	0.116035	4	0.72613		169	0.00778047	0.390645	0.488907	2	0.822148		14	8.40336e-05	0.0957265	0.978592	2	0.866072		416	0.487725	0.835821	0.00841248	2	0.75364		76
207	0.0224522	0.532895	0.417007	2	0.876668		37	0.00818666	0.0942249	0.804074	3	0.746653		219	0.263684	0.580153	0.118852	3	0.731134		237	0.495522	0.819005	0.115956	4	0.72613		170	0.00778047	0.393173	0.488426	2	0.822148		15	8.40336e-05	0.105983	0.97025	2	0.866072		417	0.487725	0.840796	0.00840781	2	0.75364		77
208	0.0226276	0.532895	0.415162	2	0.876668		38	0.00859599	0.0942249	0.796859	3	0.746653		220	0.268206	0.580153	0.1176	3	0.731134		238	0.495522	0.823529	0.115878	4	0.72613		171	0.00803146	0.393173	0.487162	2	0.822148		16	0.000168067	0.105983	0.966224	2	0.866072		418	0.488071	0.840796	0.00838305	2	0.75364		78
209	0.0226276	0.534539	0.414719	2	0.876668		39	0.00961932	0.0942249	0.755588	3	0.746653		221	0.268206	0.583969	0.117502	3	0.731134		239	0.502687	0.823529	0.114071	4	0.72613		172	0.00803146	0.394437	0.486686	2	0.822148		17	0.000168067	0.123077	0.949009	2	0.866072		419	0.488071	0.845771	0.0083797	2	0.75364		79
210	0.0233292	0.534539	0.407308	2	0.876668		40	0.00961932	0.0972644	0.754971	3	0.746653		222	0.269158	0.583969	0.117157	3	0.731134		240	0.502687	0.828054	0.113982	4	0.72613		173	0.00832427	0.394437	0.485281	2	0.822148		18	0.000252101	0.123077	0.947655	2	0.866072		420	0.50778	0.845771	0.00762864	2	0.75364		80
211	0.0233292	0.536184	0.400614	2	0.876668		41	0.010438	0.0972644	0.74246	3	0.746653		223	0.269158	0.587786	0.117012	3	0.731134		241	0.507463	0.828054	0.112349	4	0.72613		174	0.00832427	0.395702	0.484325	2	0.822148		19	0.000252101	0.128205	0.942966	2	0.866072		421	0.507953	0.845771	0.00762336	2	0.75364		81
212	0.0238555	0.536184	0.399112	2	0.876668		42	0.010438	0.100304	0.725703	3	0.746653		224	0.269634	0.587786	0.116786	3	0.731134		242	0.507463	0.837104	0.112188	4	0.72613		175	0.00903539	0.395702	0.480329	2	0.822148		20	0.000336134	0.128205	0.939476	2	0.866072		422	0.510201	0.845771	0.00751166	2	0.75364		82
213	0.0242063	0.536184	0.398487	2	0.876668		43	0.0114613	0.100304	0.702558	3	0.746653		225	0.270109	0.587786	0.116749	3	0.731134		243	0.509851	0.837104	0.111385	4	0.72613		176	0.00903539	0.396966	0.480327	2	0.822148		21	0.000336134	0.131624	0.938974	2	0.866072		423	0.510201	0.850746	0.00751129	2	0.75364		83
214	0.0242063	0.539474	0.395893	2	0.876668		44	0.0118707	0.100304	0.701322	3	0.746653		226	0.271061	0.587786	0.116518	3	0.731134		244	0.509851	0.841629	0.111325	4	0.72613		177	0.00945369	0.396966	0.479	2	0.822148		22	0.000336134	0.135043	0.931557	2	0.866072		424	0.510979	0.850746	0.00747111	2	0.75364		84
215	0.0243817	0.539474	0.394883	2	0.876668		45	0.01228	0.100304	0.697565	3	0.746653		227	0.271061	0.591603	0.116441	3	0.731134		245	0.514627	0.841629	0.110063	4	0.72613		178	0.00945369	0.39823	0.478357	2	0.822148		23	0.000504202	0.135043	0.925885	2	0.866072		425	0.510979	0.855721	0.00746972	2	0.75364		85
216	0.0243817	0.541118	0.39259	2	0.876668		46	0.01228	0.103343	0.691314	3	0.746653		228	0.280819	0.591603	0.112668	3	0.731134		246	0.514627	0.846154	0.109742	4	0.72613		179	0.00966285	0.39823	0.476893	2	0.822148		24	0.000504202	0.140171	0.914504	2	0.866072		426	0.512448	0.855721	0.00741134	2	0.75364		86
217	0.0245571	0.541118	0.390039	2	0.876668		47	0.0124847	0.103343	0.690641	3	0.746653		229	0.280819	0.59542	0.112621	3	0.731134		247	0.536716	0.846154	0.102643	4	0.72613		180	0.00966285	0.399494	0.476814	2	0.822148		25	0.000504202	0.147009	0.906788	2	0.866072		427	0.512621	0.855721	0.00740916	2	0.75364		87
218	0.0245571	0.542763	0.388374	2	0.876668		48	0.0124847	0.106383	0.677798	3	0.746653		230	0.281295	0.59542	0.112587	3	0.731134		248	0.536716	0.850679	0.10255	4	0.72613		181	0.00970468	0.399494	0.476309	2	0.822148		26	0.000504202	0.152137	0.88861	2	0.866072		428	0.520055	0.855721	0.0071839	2	0.75364		88
219	0.0249079	0.542763	0.387491	2	0.876668		49	0.0130986	0.106383	0.662044	3	0.746653		231	0.281295	0.599237	0.11257	3	0.731134		249	0.541493	0.850679	0.101164	4	0.72613		182	0.00970468	0.400759	0.476178	2	0.822148		27	0.000504202	0.155556	0.870575	2	0.866072		429	0.520228	0.855721	0.00718379	2	0.75364		89
220	0.0249079	0.544408	0.386106	2	0.876668		50	0.0130986	0.112462	0.648194	3	0.746653		232	0.28296	0.599237	0.111829	3	0.731134		250	0.541493	0.855204	0.100963	4	0.72613		183	0.0100393	0.400759	0.474991	2	0.822148		28	0.000504202	0.157265	0.869265	2	0.866072		430	0.53259	0.855721	0.00682399	2	0.75364		90
221	0.0256095	0.544408	0.382035	2	0.876668		51	0.0145313	0.112462	0.621359	3	0.746653		233	0.28296	0.603053	0.111749	3	0.731134		251	0.544478	0.855204	0.100676	4	0.72613		184	0.0100393	0.403287	0.474724	2	0.822148		29	0.000672269	0.157265	0.86503	2	0.866072		431	0.53259	0.860697	0.00682277	2	0.75364		91
222	0.0256095	0.549342	0.377901	2	0.876668		52	0.0145313	0.115502	0.619747	3	0.746653		234	0.283198	0.603053	0.111567	3	0.731134		252	0.544478	0.859729	0.100114	4	0.72613		185	0.0103321	0.403287	0.473739	2	0.822148		30	0.000672269	0.158974	0.858226	2	0.866072		432	0.53916	0.860697	0.0066066	2	0.75364		92
223	0.0259604	0.549342	0.375301	2	0.876668		53	0.015964	0.115502	0.602047	3	0.746653		235	0.283198	0.60687	0.111547	3	0.731134		253	0.549254	0.859729	0.098755	4	0.72613		186	0.0103321	0.404551	0.473576	2	0.822148		31	0.000672269	0.162393	0.857496	2	0.866072		433	0.53916	0.865672	0.00660615	2	0.75364		93
224	0.0259604	0.552632	0.37522	2	0.876668		54	0.015964	0.118541	0.597626	3	0.746653		236	0.285102	0.60687	0.110883	3	0.731134		254	0.549254	0.864253	0.098382	4	0.72613		187	0.0107923	0.404551	0.471523	2	0.822148		32	0.000756303	0.162393	0.856324	2	0.866072		434	0.553855	0.865672	0.00616694	2	0.75364		94
225	0.0263112	0.552632	0.371651	2	0.876668		55	0.0161686	0.118541	0.592214	3	0.746653		237	0.285102	0.614504	0.110821	3	0.731134		255	0.553433	0.864253	0.0975325	4	0.72613		188	0.0107923	0.405815	0.471447	2	0.822148		33	0.00092437	0.162393	0.853001	2	0.866072		435	0.554028	0.865672	0.00616309	2	0.75364		95
226	0.0263112	0.554276	0.371593	2	0.876668		56	0.0161686	0.12462	0.582477	3	0.746653		238	0.285578	0.614504	0.110616	3	0.731134		256	0.553433	0.868778	0.0975115	4	0.72613		189	0.0108759	0.405815	0.471065	2	0.822148		34	0.00092437	0.165812	0.844202	2	0.866072		436	0.562932	0.865672	0.00588101	2	0.75364		96
227	0.026662	0.554276	0.370544	2	0.876668		57	0.0169873	0.12462	0.55724	3	0.746653		239	0.285578	0.618321	0.110497	3	0.731134		257	0.555821	0.868778	0.0961842	4	0.72613		190	0.0108759	0.408344	0.470654	2	0.822148		35	0.0010084	0.165812	0.838444	2	0.866072		437	0.562932	0.870647	0.00587389	2	0.75364		97
228	0.0270128	0.554276	0.370276	2	0.876668		58	0.0169873	0.12766	0.556748	3	0.746653		240	0.286292	0.618321	0.110274	3	0.731134		258	0.555821	0.873303	0.0961839	4	0.72613		191	0.0109178	0.408344	0.470567	2	0.822148		36	0.00117647	0.165812	0.816291	2	0.866072		438	0.567254	0.870647	0.0057554	2	0.75364		98
229	0.0280653	0.554276	0.359564	2	0.876668		59	0.019034	0.12766	0.510468	3	0.746653		241	0.286292	0.622137	0.110223	3	0.731134		259	0.570149	0.873303	0.0920045	4	0.72613		192	0.0109178	0.409608	0.470278	2	0.822148		37	0.00134454	0.165812	0.810753	2	0.866072		439	0.567254	0.875622	0.0057534	2	0.75364		99
230	0.0280653	0.555921	0.359256	2	0.876668		60	0.019034	0.130699	0.50806	3	0.746653		242	0.289386	0.622137	0.109337	3	0.731134		260	0.570149	0.877828	0.0919663	4	0.72613		193	0.0112524	0.409608	0.466702	2	0.822148		38	0.00134454	0.167521	0.795615	2	0.866072		440	0.571317	0.875622	0.00564633	2	0.75364		100
231	0.0282407	0.555921	0.35687	2	0.876668		61	0.019648	0.130699	0.499601	3	0.746653		243	0.289386	0.625954	0.109328	3	0.731134		261	0.574925	0.877828	0.0912175	4	0.72613		194	0.0112524	0.410872	0.466624	2	0.822148		39	0.00142857	0.167521	0.794853	2	0.866072		441	0.57149	0.875622	0.0056439	2	0.75364		101
232	0.0282407	0.557566	0.353004	2	0.876668		62	0.019648	0.133739	0.498193	3	0.746653		244	0.290576	0.625954	0.108848	3	0.731134		262	0.574925	0.882353	0.0908588	4	0.72613		195	0.0112942	0.410872	0.466453	2	0.822148		40	0.00142857	0.169231	0.786637	2	0.866072		442	0.580826	0.875622	0.0054028	2	0.75364		102
233	0.0292931	0.557566	0.339447	2	0.876668		63	0.022718	0.133739	0.438333	3	0.746653		245	0.290576	0.629771	0.108767	3	0.731134		263	0.586269	0.882353	0.0875653	4	0.72613		196	0.0112942	0.412137	0.466419	2	0.822148		41	0.00168067	0.169231	0.780691	2	0.866072		443	0.580999	0.875622	0.00539907	2	0.75364		103
234	0.0292931	0.559211	0.33885	2	0.876668		64	0.022718	0.136778	0.432279	3	0.746653		246	0.295336	0.629771	0.106791	3	0.731134		264	0.586269	0.886878	0.0871817	4	0.72613		197	0.0113361	0.412137	0.466417	2	0.822148		42	0.00168067	0.174359	0.757808	2	0.866072		444	0.595954	0.875622	0.00494621	2	0.75364		104
235	0.0296439	0.559211	0.33705	2	0.876668		65	0.0231273	0.136778	0.428813	3	0.746653		247	0.295336	0.633588	0.106657	3	0.731134		265	0.589851	0.886878	0.0861357	4	0.72613		198	0.0113361	0.413401	0.466143	2	0.822148		43	0.00176471	0.174359	0.757567	2	0.866072		445	0.595954	0.880597	0.00494545	2	0.75364		105
236	0.0296439	0.5625	0.335181	2	0.876668		66	0.0231273	0.139818	0.425092	3	0.746653		248	0.297001	0.633588	0.105921	3	0.731134		266	0.589851	0.891403	0.0859918	4	0.72613		199	0.0115034	0.413401	0.465683	2	0.822148		44	0.00193277	0.174359	0.756646	2	0.866072		446	0.597683	0.880597	0.00490983	2	0.75364		106
237	0.0298193	0.5625	0.332138	2	0.876668		67	0.0241506	0.139818	0.417361	3	0.746653		249	0.297001	0.637405	0.105884	3	0.731134		267	0.596418	0.891403	0.08448	4	0.72613		200	0.0115034	0.414665	0.465411	2	0.822148		45	0.00193277	0.176068	0.741503	2	0.866072		447	0.597856	0.880597	0.00490872	2	0.75364		107
238	0.0298193	0.564145	0.33197	2	0.876668		68	0.02456	0.139818	0.41687	3	0.746653		250	0.300809	0.637405	0.104127	3	0.731134		268	0.596418	0.895928	0.0843838	4	0.72613		201	0.011587	0.414665	0.465132	2	0.822148		46	0.00201681	0.176068	0.715318	2	0.866072		448	0.600017	0.880597	0.00487169	2	0.75364		108
239	0.0299947	0.564145	0.331949	2	0.876668		69	0.0268113	0.139818	0.402807	3	0.746653		251	0.300809	0.641221	0.104024	3	0.731134		269	0.607761	0.895928	0.0817519	4	0.72613		202	0.011587	0.415929	0.464911	2	0.822148		47	0.00201681	0.177778	0.71148	2	0.866072		449	0.60019	0.880597	0.00487072	2	0.75364		109
240	0.0299947	0.567434	0.32846	2	0.876668		70	0.0268113	0.142857	0.401897	3	0.746653		252	0.301761	0.641221	0.103665	3	0.731134		270	0.607761	0.900452	0.0817486	4	0.72613		203	0.0117544	0.415929	0.463881	2	0.822148		48	0.00201681	0.181197	0.701192	2	0.866072		450	0.601573	0.880597	0.00482726	2	0.75364		110
241	0.0299947	0.569079	0.327059	2	0.876668		71	0.028244	0.142857	0.392281	3	0.746653		253	0.301761	0.645038	0.103577	3	0.731134		271	0.637015	0.900452	0.0713617	4	0.72613		204	0.0117544	0.417193	0.463772	2	0.822148		49	0.00210084	0.181197	0.690405	2	0.866072		451	0.601833	0.880597	0.00482393	2	0.75364		111
242	0.0303456	0.569079	0.325445	2	0.876668		72	0.0286533	0.142857	0.385813	3	0.746653		254	0.306283	0.645038	0.101958	3	0.731134		272	0.637015	0.904977	0.0708907	4	0.72613		205	0.011838	0.417193	0.463542	2	0.822148		50	0.00210084	0.182906	0.689973	2	0.866072		452	0.606501	0.880597	0.00472678	2	0.75364		112
243	0.0303456	0.570724	0.32538	2	0.876668		73	0.028858	0.142857	0.384511	3	0.746653		255	0.306283	0.648855	0.101958	3	0.731134		273	0.650149	0.904977	0.0676179	4	0.72613		206	0.011838	0.419722	0.463098	2	0.822148		51	0.00218487	0.182906	0.687803	2	0.866072		453	0.606501	0.885572	0.00472346	2	0.75364		113
244	0.030521	0.570724	0.322823	2	0.876668		74	0.028858	0.148936	0.383124	3	0.746653		256	0.309614	0.648855	0.0999715	3	0.731134		274	0.650149	0.909502	0.0674119	4	0.72613		207	0.0119217	0.419722	0.462624	2	0.822148		52	0.00235294	0.182906	0.684771	2	0.866072		454	0.607538	0.885572	0.0046996	2	0.75364		114
245	0.030521	0.574013	0.31873	2	0.876668		75	0.0298813	0.148936	0.372157	3	0.746653		257	0.309614	0.652672	0.0999592	3	0.731134		275	0.667463	0.909502	0.0634452	4	0.72613		208	0.0119217	0.420986	0.462453	2	0.822148		53	0.00235294	0.184615	0.682693	2	0.866072		455	0.607711	0.885572	0.00469911	2	0.75364		115
246	0.0306964	0.574013	0.316196	2	0.876668		76	0.0298813	0.151976	0.368109	3	0.746653		258	0.311994	0.652672	0.0991961	3	0.731134		276	0.667463	0.914027	0.0633255	4	0.72613		209	0.0122563	0.420986	0.460954	2	0.822148		54	0.00252101	0.184615	0.679921	2	0.866072		456	0.612898	0.885572	0.00457776	2	0.75364		116
247	0.0306964	0.577303	0.312303	2	0.876668		77	0.030086	0.151976	0.364189	3	0.746653		259	0.311994	0.656489	0.0990967	3	0.731134		277	0.684179	0.914027	0.0600869	4	0.72613		210	0.0122563	0.42225	0.460726	2	0.822148		55	0.00252101	0.186325	0.674086	2	0.866072		457	0.612898	0.890547	0.00457693	2	0.75364		117
248	0.0324504	0.577303	0.301113	2	0.876668		78	0.030086	0.155015	0.362116	3	0.746653		260	0.312708	0.656489	0.099018	3	0.731134		278	0.684179	0.918552	0.0600337	4	0.72613		211	0.0126328	0.42225	0.458744	2	0.822148		56	0.00260504	0.186325	0.665968	2	0.866072		458	0.619295	0.890547	0.00444176	2	0.75364		118
249	0.0324504	0.580592	0.301007	2	0.876668		79	0.0302906	0.155015	0.360446	3	0.746653		261	0.312708	0.664122	0.0990031	3	0.731134		279	0.699104	0.918552	0.0567729	4	0.72613		212	0.0126328	0.423515	0.458346	2	0.822148		57	0.00260504	0.188034	0.65659	2	0.866072		459	0.619467	0.890547	0.00444152	2	0.75364		119
250	0.0350816	0.580592	0.282497	2	0.876668		80	0.0302906	0.158055	0.358197	3	0.746653		262	0.321276	0.664122	0.0959266	3	0.731134		280	0.699104	0.923077	0.0566097	4	0.72613		213	0.0127165	0.423515	0.457734	2	0.822148		58	0.00268908	0.188034	0.654884	2	0.866072		460	0.621542	0.890547	0.00440284	2	0.75364		120
251	0.0350816	0.582237	0.281404	2	0.876668		81	0.031314	0.158055	0.351033	3	0.746653		263	0.321276	0.667939	0.0959219	3	0.731134		281	0.705075	0.923077	0.0548905	4	0.72613		214	0.0127165	0.424779	0.457689	2	0.822148		59	0.00285714	0.188034	0.651483	2	0.866072		461	0.621542	0.895522	0.00440085	2	0.75364		121
252	0.0357832	0.582237	0.278729	2	0.876668		82	0.031314	0.164134	0.350935	3	0.746653		264	0.325559	0.667939	0.0939495	3	0.731134		282	0.705075	0.927602	0.0544687	4	0.72613		215	0.0130511	0.424779	0.455797	2	0.822148		60	0.00285714	0.191453	0.647369	2	0.866072		462	0.625	0.895522	0.00432954	2	0.75364		122
253	0.0357832	0.583882	0.27797	2	0.876668		83	0.0333606	0.164134	0.335478	3	0.746653		265	0.325559	0.671756	0.09386	3	0.731134		283	0.721791	0.927602	0.0509904	4	0.72613		216	0.0130511	0.426043	0.45565	2	0.822148		61	0.00285714	0.196581	0.632499	2	0.866072		463	0.625173	0.895522	0.00432644	2	0.75364		123
254	0.0368356	0.583882	0.272176	2	0.876668		84	0.0333606	0.167173	0.334427	3	0.746653		266	0.327225	0.671756	0.0930351	3	0.731134		284	0.721791	0.932127	0.0508831	4	0.72613		217	0.0132184	0.426043	0.455202	2	0.822148		62	0.00285714	0.2	0.607964	2	0.866072		464	0.629495	0.895522	0.00421838	2	0.75364		124
255	0.0368356	0.585526	0.271062	2	0.876668		85	0.0347933	0.167173	0.320205	3	0.746653		267	0.327225	0.675573	0.0930249	3	0.731134		285	0.738507	0.932127	0.0469808	4	0.72613		218	0.0132184	0.427307	0.454938	2	0.822148		63	0.00310924	0.2	0.580193	2	0.866072		465	0.629668	0.895522	0.0042178	2	0.75364		125
256	0.0377127	0.585526	0.267574	2	0.876668		86	0.0347933	0.173252	0.319194	3	0.746653		268	0.330081	0.675573	0.092032	3	0.731134		286	0.738507	0.936652	0.0469091	4	0.72613		219	0.0138459	0.427307	0.451505	2	0.822148		64	0.00310924	0.201709	0.57079	2	0.866072		466	0.632694	0.895522	0.00416038	2	0.75364		126
257	0.0377127	0.587171	0.266825	2	0.876668		87	0.0370446	0.173252	0.310769	3	0.746653		269	0.330081	0.679389	0.0920255	3	0.731134		287	0.742687	0.936652	0.0464088	4	0.72613		220	0.0138459	0.428571	0.450784	2	0.822148		65	0.00319328	0.201709	0.562834	2	0.866072		467	0.632867	0.895522	0.00415954	2	0.75364		127
258	0.0380635	0.587171	0.266408	2	0.876668		88	0.0370446	0.176292	0.30807	3	0.746653		270	0.331747	0.679389	0.0913014	3	0.731134		288	0.742687	0.941176	0.0463035	4	0.72613		221	0.0140132	0.428571	0.450563	2	0.822148		66	0.00319328	0.203419	0.549663	2	0.866072		468	0.634682	0.895522	0.00411107	2	0.75364		128
259	0.0384143	0.587171	0.266184	2	0.876668		89	0.0378633	0.176292	0.30498	3	0.746653		271	0.331747	0.683206	0.0912261	3	0.731134		289	0.754627	0.941176	0.0437214	4	0.72613		222	0.0140132	0.429836	0.450287	2	0.822148		67	0.00327731	0.203419	0.547134	2	0.866072		469	0.634855	0.895522	0.00410902	2	0.75364		129
260	0.0387651	0.587171	0.263892	2	0.876668		90	0.0378633	0.179331	0.30462	3	0.746653		272	0.332223	0.683206	0.0908551	3	0.731134		290	0.754627	0.945701	0.043697	4	0.72613		223	0.0144734	0.429836	0.447594	2	0.822148		68	0.00327731	0.205128	0.540209	2	0.866072		470	0.63814	0.895522	0.00403904	2	0.75364		130
261	0.0387651	0.588816	0.263096	2	0.876668		91	0.0382726	0.179331	0.297092	3	0.746653		273	0.332223	0.69084	0.0907062	3	0.731134		291	0.764776	0.945701	0.0412129	4	0.72613		224	0.0144734	0.4311	0.447573	2	0.822148		69	0.00344538	0.205128	0.525095	2	0.866072		471	0.63814	0.900498	0.00403717	2	0.75364		131
262	0.0389405	0.588816	0.261861	2	0.876668		92	0.0386819	0.179331	0.291798	3	0.746653		274	0.333175	0.69084	0.0902924	3	0.731134		292	0.764776	0.950226	0.0411624	4	0.72613		225	0.0148917	0.4311	0.446075	2	0.822148		70	0.00344538	0.206838	0.518234	2	0.866072		472	0.642116	0.900498	0.00396372	2	0.75364		132
263	0.0389405	0.59375	0.260932	2	0.876668		93	0.0403193	0.179331	0.283798	3	0.746653		275	0.333175	0.70229	0.0899935	3	0.731134		293	0.798806	0.950226	0.035869	4	0.72613		226	0.0148917	0.432364	0.44599	2	0.822148		71	0.00344538	0.210256	0.516347	2	0.866072		473	0.642116	0.905473	0.00396065	2	0.75364		133
264	0.0392914	0.59375	0.257896	2	0.876668		94	0.0403193	0.182371	0.283514	3	0.746653		276	0.340314	0.70229	0.0876955	3	0.731134		294	0.798806	0.954751	0.0356074	4	0.72613		227	0.0149753	0.432364	0.445205	2	0.822148		72	0.00352941	0.210256	0.51039	2	0.866072		474	0.644191	0.905473	0.00391625	2	0.75364		134
265	0.0392914	0.595395	0.256228	2	0.876668		95	0.0411379	0.182371	0.282088	3	0.746653		277	0.340314	0.706107	0.0876925	3	0.731134		295	0.825672	0.954751	0.0304826	4	0.72613		228	0.0149753	0.433628	0.444984	2	0.822148		73	0.00352941	0.213675	0.450865	2	0.866072		475	0.644191	0.910448	0.00391559	2	0.75364		135
266	0.0394668	0.595395	0.256157	2	0.876668		96	0.0411379	0.18845	0.280853	3	0.746653		278	0.341742	0.706107	0.0872119	3	0.731134		296	0.825672	0.963801	0.0303841	4	0.72613		229	0.015059	0.433628	0.444056	2	0.822148		74	0.00369748	0.213675	0.447986	2	0.866072		476	0.64445	0.910448	0.0039138	2	0.75364		136
267	0.0394668	0.597039	0.255317	2	0.876668		97	0.0419566	0.18845	0.275423	3	0.746653		279	0.341742	0.709924	0.0871611	3	0.731134		297	0.841194	0.963801	0.0273125	4	0.72613		230	0.015059	0.434893	0.443483	2	0.822148		75	0.00369748	0.215385	0.439751	2	0.866072		477	0.644623	0.910448	0.00391305	2	0.75364		137
268	0.0424487	0.597039	0.241686	2	0.876668		98	0.0423659	0.18845	0.275032	3	0.746653		280	0.342932	0.709924	0.08688	3	0.731134		298	0.841194	0.968326	0.0272316	4	0.72613		231	0.0153518	0.434893	0.441779	2	0.822148		76	0.00403361	0.215385	0.411171	2	0.866072		478	0.651712	0.910448	0.00376853	2	0.75364		138
269	0.0424487	0.598684	0.241258	2	0.876668		99	0.0423659	0.191489	0.274284	3	0.746653		281	0.343408	0.709924	0.0868413	3	0.731134		299	0.842388	0.968326	0.0271689	4	0.72613		232	0.0153518	0.436157	0.441766	2	0.822148		77	0.00403361	0.217094	0.410699	2	0.866072		479	0.651885	0.910448	0.00376615	2	0.75364		139
270	0.0427995	0.598684	0.240334	2	0.876668		100	0.0425706	0.191489	0.273188	3	0.746653		282	0.344836	0.709924	0.086263	3	0.731134		300	0.842388	0.972851	0.0270888	4	0.72613		233	0.0155191	0.436157	0.441255	2	0.822148		78	0.00420168	0.217094	0.399769	2	0.866072		480	0.652576	0.910448	0.00375532	2	0.75364		140
271	0.0427995	0.600329	0.237805	2	0.876668		101	0.0425706	0.200608	0.271487	3	0.746653		283	0.344836	0.71374	0.0862449	3	0.731134		301	0.844179	0.972851	0.0267946	4	0.72613		234	0.0155191	0.438685	0.441249	2	0.822148		79	0.00420168	0.218803	0.398046	2	0.866072		481	0.652576	0.915423	0.0037536	2	0.75364		141
272	0.043852	0.600329	0.233765	2	0.876668		102	0.0435939	0.200608	0.266582	3	0.746653		284	0.346026	0.71374	0.0859822	3	0.731134		302	0.844179	0.977376	0.0267265	4	0.72613		235	0.0156028	0.438685	0.440931	2	0.822148		80	0.00470588	0.218803	0.379664	2	0.866072		482	0.661739	0.915423	0.00356285	2	0.75364		142
273	0.043852	0.601974	0.233169	2	0.876668		103	0.0435939	0.203647	0.266431	3	0.746653		285	0.346026	0.717557	0.0858987	3	0.731134		303	0.864478	0.977376	0.0225726	4	0.72613		236	0.0156028	0.439949	0.440776	2	0.822148		81	0.00470588	0.222222	0.374623	2	0.866072		483	0.661739	0.920398	0.00356283	2	0.75364		143
274	0.0445536	0.601974	0.228706	2	0.876668		104	0.0452313	0.203647	0.263689	3	0.746653		286	0.34674	0.717557	0.0856471	3	0.731134		304	0.864478	0.9819	0.0225292	4	0.72613		237	0.0157701	0.439949	0.440155	2	0.822148		82	0.00478992	0.222222	0.373393	2	0.866072		484	0.665889	0.920398	0.00349137	2	0.75364		144
275	0.0445536	0.603618	0.2284	2	0.876668		105	0.0452313	0.206687	0.262422	3	0.746653		287	0.34674	0.721374	0.0856221	3	0.731134		305	0.884776	0.9819	0.0195607	4	0.72613		238	0.0157701	0.441214	0.440062	2	0.822148		83	0.00478992	0.223932	0.373317	2	0.866072		485	0.665889	0.925373	0.00348991	2	0.75364		145
276	0.0452552	0.603618	0.223241	2	0.876668		106	0.0468686	0.206687	0.258234	3	0.746653		288	0.351737	0.721374	0.0842619	3	0.731134		306	0.884776	0.986425	0.0193889	4	0.72613		239	0.0163139	0.441214	0.437539	2	0.822148		84	0.00521008	0.223932	0.357623	2	0.866072		486	0.679461	0.925373	0.00326865	2	0.75364		146
277	0.0459568	0.603618	0.221349	2	0.876668		107	0.0468686	0.209726	0.257904	3	0.746653		289	0.351737	0.725191	0.0842526	3	0.731134		307	0.890746	0.986425	0.0187071	4	0.72613		240	0.0163139	0.442478	0.43736	2	0.822148		85	0.00521008	0.22735	0.349617	2	0.866072		487	0.679633	0.925373	0.00326838	2	0.75364		147
278	0.0463077	0.603618	0.220848	2	0.876668		108	0.0480966	0.209726	0.254391	3	0.746653		290	0.357925	0.725191	0.0825266	3	0.731134		308	0.890746	0.99095	0.0186727	4	0.72613		241	0.0163557	0.442478	0.436973	2	0.822148		86	0.00521008	0.22906	0.349018	2	0.866072		488	0.685598	0.925373	0.00316353	2	0.75364		148
279	0.0466585	0.603618	0.219936	2	0.876668		109	0.0485059	0.209726	0.254357	3	0.746653		291	0.357925	0.729008	0.0823069	3	0.731134		309	0.924179	0.99095	0.0143526	4	0.72613		242	0.0163557	0.443742	0.436904	2	0.822148		87	0.00529412	0.22906	0.347724	2	0.866072		489	0.685771	0.925373	0.00316144	2	0.75364		149
280	0.0475355	0.603618	0.218664	2	0.876668		110	0.0485059	0.212766	0.252552	3	0.746653		292	0.360067	0.729008	0.0818286	3	0.731134		310	0.924179	0.995475	0.0142262	4	0.72613		243	0.0167322	0.443742	0.43567	2	0.822148		88	0.00529412	0.230769	0.345828	2	0.866072		490	0.689661	0.925373	0.00310922	2	0.75364		150
281	0.0475355	0.605263	0.218454	2	0.876668		111	0.0493246	0.212766	0.250557	3	0.746653		293	0.360067	0.732824	0.0818019	3	0.731134		311	1	0.995475	0.00216408	4	0.72613		244	0.0167322	0.446271	0.435554	2	0.822148		89	0.00546218	0.230769	0.336432	2	0.866072		491	0.689661	0.930348	0.00310921	2	0.75364		151
282	0.0477109	0.605263	0.217279	2	0.876668		112	0.0493246	0.215805	0.248855	3	0.746653		294	0.376011	0.732824	0.0771335	3	0.731134		312	1	1	0.000838941	4	0.72613		245	0.0178616	0.446271	0.430697	2	0.822148		90	0.00546218	0.232479	0.32718	2	0.866072		492	0.692514	0.930348	0.00306904	2	0.75364		152
283	0.0477109	0.606908	0.216714	2	0.876668		113	0.0501433	0.215805	0.247604	3	0.746653		295	0.376011	0.736641	0.0771215	3	0.731134		0	0	0	1.99666	5	0.712647		246	0.0178616	0.447535	0.430258	2	0.822148		91	0.00554622	0.232479	0.32559	2	0.866072		493	0.692687	0.930348	0.00306881	2	0.75364		153
284	0.0478863	0.606908	0.216612	2	0.876668		114	0.0501433	0.221884	0.246129	3	0.746653		296	0.377915	0.736641	0.0765942	3	0.731134		1	0	0.003861	0.996663	5	0.712647		247	0.0183636	0.447535	0.428508	2	0.822148		92	0.00554622	0.235897	0.316767	2	0.866072		494	0.700467	0.930348	0.00293805	2	0.75364		154
285	0.0478863	0.610197	0.215678	2	0.876668		115	0.0513713	0.221884	0.242624	3	0.746653		297	0.377915	0.740458	0.0764438	3	0.731134		2	0	0.015444	0.988112	5	0.712647		248	0.0183636	0.448799	0.428416	2	0.822148		93	0.00563025	0.235897	0.315708	2	0.866072		495	0.700467	0.935323	0.00293766	2	0.75364		155
286	0.048588	0.610197	0.214878	2	0.876668		116	0.0517806	0.221884	0.242381	3	0.746653		298	0.379343	0.740458	0.07611	3	0.731134		3	0	0.023166	0.949704	5	0.712647		249	0.0186564	0.448799	0.426904	2	0.822148		94	0.00563025	0.239316	0.30838	2	0.866072		496	0.7111	0.935323	0.0027523	2	0.75364		156
287	0.048588	0.611842	0.214267	2	0.876668		117	0.0517806	0.227964	0.239882	3	0.746653		299	0.379343	0.744275	0.0760473	3	0.731134		4	0	0.030888	0.92291	5	0.712647		250	0.0186564	0.450063	0.426764	2	0.822148		95	0.00571429	0.239316	0.295805	2	0.866072		497	0.711359	0.935323	0.00275028	2	0.75364		157
288	0.0487634	0.611842	0.214254	2	0.876668		118	0.0521899	0.227964	0.238727	3	0.746653		300	0.382437	0.744275	0.0753977	3	0.731134		5	0.00149477	0.030888	0.893095	5	0.712647		251	0.0186982	0.450063	0.426682	2	0.822148		96	0.00571429	0.241026	0.294213	2	0.866072		498	0.711878	0.935323	0.00274106	2	0.75364		158
289	0.0487634	0.615132	0.213295	2	0.876668		119	0.0521899	0.231003	0.238441	3	0.746653		301	0.382913	0.744275	0.0753417	3	0.731134		6	0.00149477	0.0540541	0.756379	5	0.712647		252	0.0186982	0.451327	0.426668	2	0.822148		97	0.00613445	0.241026	0.277075	2	0.866072		499	0.711878	0.940299	0.00273748	2	0.75364		159
290	0.0491142	0.615132	0.212597	2	0.876668		120	0.0538273	0.231003	0.233037	3	0.746653		302	0.387911	0.744275	0.0740662	3	0.731134		7	0.00224215	0.0540541	0.747095	5	0.712647		253	0.0187401	0.451327	0.42656	2	0.822148		98	0.00613445	0.242735	0.272811	2	0.866072		500	0.71205	0.940299	0.00272892	2	0.75364		160
291	0.0506929	0.615132	0.210166	2	0.876668		121	0.0542366	0.231003	0.231358	3	0.746653		303	0.387911	0.748092	0.0740043	3	0.731134		8	0.00224215	0.0656371	0.646712	5	0.712647		254	0.0187401	0.452592	0.42627	2	0.822148		99	0.00697479	0.242735	0.231082	2	0.866072		501	0.712223	0.940299	0.00272856	2	0.75364		161
292	0.0506929	0.616776	0.209847	2	0.876668		122	0.0560786	0.231003	0.226321	3	0.746653		304	0.390528	0.748092	0.0731494	3	0.731134		9	0.00523169	0.0656371	0.585397	5	0.712647		255	0.0195348	0.452592	0.42402	2	0.822148		100	0.00697479	0.246154	0.231081	2	0.866072		502	0.714212	0.940299	0.00270173	2	0.75364		162
293	0.0520961	0.616776	0.20705	2	0.876668		123	0.0560786	0.234043	0.225522	3	0.746653		305	0.390528	0.751908	0.0731336	3	0.731134		10	0.00523169	0.0694981	0.575394	5	0.712647		256	0.0195348	0.453856	0.423973	2	0.822148		101	0.00714286	0.246154	0.230374	2	0.866072		503	0.714212	0.945274	0.00270054	2	0.75364		163
294	0.0520961	0.618421	0.207042	2	0.876668		124	0.0564879	0.234043	0.224411	3	0.746653		306	0.391956	0.751908	0.0726033	3	0.731134		11	0.00597907	0.0694981	0.572567	5	0.712647		257	0.0197858	0.453856	0.42259	2	0.822148		102	0.00756303	0.246154	0.216851	2	0.866072		504	0.718966	0.945274	0.00260869	2	0.75364		164
295	0.0522715	0.618421	0.206531	2	0.876668		125	0.0564879	0.237082	0.224081	3	0.746653		307	0.391956	0.755725	0.0725162	3	0.731134		12	0.00597907	0.0733591	0.519437	5	0.712647		258	0.0197858	0.45512	0.422481	2	0.822148		103	0.00756303	0.247863	0.215755	2	0.866072		505	0.719139	0.945274	0.00260708	2	0.75364		165
296	0.0522715	0.620066	0.206382	2	0.876668		126	0.0566926	0.237082	0.22389	3	0.746653		308	0.39267	0.755725	0.0721772	3	0.731134		13	0.00672646	0.0733591	0.516688	5	0.712647		259	0.0198277	0.45512	0.422361	2	0.822148		104	0.00773109	0.247863	0.211062	2	0.866072		506	0.722424	0.945274	0.00257155	2	0.75364		166
297	0.053324	0.620066	0.203215	2	0.876668		127	0.0566926	0.240122	0.223704	3	0.746653		309	0.39267	0.759542	0.0721379	3	0.731134		14	0.00672646	0.0849421	0.50046	5	0.712647		260	0.0198277	0.456384	0.422298	2	0.822148		105	0.00773109	0.249573	0.209747	2	0.866072		507	0.722424	0.950249	0.00257138	2	0.75364		167
298	0.053324	0.621711	0.202661	2	0.876668		128	0.0579206	0.240122	0.220721	3	0.746653		310	0.397668	0.759542	0.070812	3	0.731134		15	0.00822123	0.0849421	0.484517	5	0.712647		261	0.0198695	0.456384	0.422217	2	0.822148		106	0.00806723	0.249573	0.202271	2	0.866072		508	0.730896	0.950249	0.00244244	2	0.75364		168
299	0.054201	0.621711	0.19887	2	0.876668		129	0.0579206	0.243161	0.220686	3	0.746653		311	0.397668	0.763359	0.070769	3	0.731134		16	0.00822123	0.0888031	0.477642	5	0.712647		262	0.0198695	0.460177	0.421426	2	0.822148		107	0.00806723	0.251282	0.201983	2	0.866072		509	0.731068	0.950249	0.00243919	2	0.75364		169
300	0.054201	0.625	0.198714	2	0.876668		130	0.0603766	0.243161	0.215369	3	0.746653		312	0.404569	0.763359	0.0690033	3	0.731134		17	0.00971599	0.0888031	0.468286	5	0.712647		263	0.0206643	0.460177	0.418405	2	0.822148		108	0.00823529	0.251282	0.197121	2	0.866072		510	0.736342	0.950249	0.00236089	2	0.75364		170
301	0.0543764	0.625	0.198318	2	0.876668		131	0.0603766	0.246201	0.214917	3	0.746653		313	0.404569	0.767176	0.0689748	3	0.731134		18	0.00971599	0.0926641	0.465323	5	0.712647		264	0.0206643	0.461441	0.418116	2	0.822148		109	0.00823529	0.254701	0.192282	2	0.866072		511	0.736515	0.950249	0.0023591	2	0.75364		171
302	0.0543764	0.628289	0.197799	2	0.876668		132	0.0626279	0.246201	0.212375	3	0.746653		314	0.405759	0.767176	0.0687076	3	0.731134		19	0.0104634	0.0926641	0.464373	5	0.712647		265	0.0227558	0.461441	0.411537	2	0.822148		110	0.00857143	0.254701	0.187053	2	0.866072		512	0.736687	0.950249	0.00235469	2	0.75364		172
303	0.0552535	0.628289	0.195686	2	0.876668		133	0.0626279	0.24924	0.212357	3	0.746653		315	0.405759	0.770992	0.0686969	3	0.731134		20	0.0104634	0.0965251	0.458179	5	0.712647		266	0.0227558	0.462705	0.411408	2	0.822148		111	0.00857143	0.25641	0.185363	2	0.866072		513	0.736687	0.955224	0.00235469	2	0.75364		173
304	0.0552535	0.629934	0.195135	2	0.876668		134	0.0654932	0.24924	0.208129	3	0.746653		316	0.407901	0.770992	0.0681575	3	0.731134		21	0.0127055	0.0965251	0.439579	5	0.712647		267	0.0235924	0.462705	0.407902	2	0.822148		112	0.00890756	0.25641	0.180779	2	0.866072		514	0.736774	0.955224	0.00235408	2	0.75364		174
305	0.057183	0.629934	0.191398	2	0.876668		135	0.0654932	0.25228	0.207841	3	0.746653		317	0.407901	0.774809	0.0681441	3	0.731134		22	0.0127055	0.108108	0.433295	5	0.712647		268	0.0235924	0.46397	0.407901	2	0.822148		113	0.00890756	0.25812	0.178954	2	0.866072		515	0.736774	0.960199	0.00235237	2	0.75364		175
306	0.057183	0.631579	0.191074	2	0.876668		136	0.0677446	0.25228	0.205252	3	0.746653		318	0.408139	0.774809	0.068128	3	0.731134		23	0.0156951	0.108108	0.425954	5	0.712647		269	0.0238434	0.46397	0.407078	2	0.822148		114	0.00957983	0.25812	0.170961	2	0.866072		516	0.740405	0.960199	0.0023148	2	0.75364		176
307	0.0575338	0.631579	0.19028	2	0.876668		137	0.0677446	0.255319	0.204468	3	0.746653		319	0.408615	0.774809	0.0680674	3	0.731134		24	0.0156951	0.111969	0.424566	5	0.712647		270	0.0238434	0.466498	0.406144	2	0.822148		115	0.00957983	0.259829	0.169645	2	0.866072		517	0.740405	0.965174	0.00231131	2	0.75364		177
308	0.0575338	0.636513	0.187525	2	0.876668		138	0.0714286	0.255319	0.200524	3	0.746653		320	0.412661	0.774809	0.067166	3	0.731134		25	0.0164425	0.111969	0.424344	5	0.712647		271	0.0240525	0.466498	0.405571	2	0.822148		116	0.0104202	0.259829	0.159593	2	0.866072		518	0.747666	0.965174	0.00220863	2	0.75364		178
309	0.0585862	0.636513	0.183889	2	0.876668		139	0.0714286	0.258359	0.20042	3	0.746653		321	0.412661	0.778626	0.0671118	3	0.731134		26	0.0164425	0.11583	0.423934	5	0.712647		272	0.0240525	0.467762	0.405495	2	0.822148		117	0.0105882	0.259829	0.159503	2	0.866072		519	0.747839	0.965174	0.00220848	2	0.75364		179
310	0.0585862	0.638158	0.183829	2	0.876668		140	0.0753172	0.258359	0.195362	3	0.746653		322	0.421942	0.778626	0.0644731	3	0.731134		27	0.0171898	0.11583	0.421962	5	0.712647		273	0.0241362	0.467762	0.405326	2	0.822148		118	0.0108403	0.259829	0.158722	2	0.866072		520	0.773427	0.965174	0.00184115	2	0.75364		180
311	0.0592878	0.638158	0.182482	2	0.876668		141	0.0753172	0.261398	0.194916	3	0.746653		323	0.421942	0.782443	0.0644139	3	0.731134		28	0.0171898	0.127413	0.414414	5	0.712647		274	0.0241362	0.469027	0.405157	2	0.822148		119	0.0108403	0.261538	0.157758	2	0.866072		521	0.7736	0.965174	0.00184066	2	0.75364		181
312	0.0592878	0.639803	0.181742	2	0.876668		142	0.0757266	0.261398	0.194859	3	0.746653		324	0.430747	0.782443	0.0624001	3	0.731134		29	0.0186846	0.127413	0.405232	5	0.712647		275	0.024429	0.469027	0.403966	2	0.822148		120	0.0110084	0.261538	0.156415	2	0.866072		522	0.821058	0.965174	0.0013191	2	0.75364		182
313	0.0601649	0.639803	0.179312	2	0.876668		143	0.0757266	0.264438	0.194479	3	0.746653		325	0.430747	0.78626	0.0620225	3	0.731134		30	0.0186846	0.138996	0.39749	5	0.712647		276	0.024429	0.470291	0.403892	2	0.822148		121	0.0110084	0.263248	0.156335	2	0.866072		523	0.821231	0.965174	0.00131864	2	0.75364		183
314	0.0601649	0.641447	0.17924	2	0.876668		144	0.0765452	0.264438	0.193585	3	0.746653		326	0.431699	0.78626	0.0618194	3	0.731134		31	0.0224215	0.138996	0.386896	5	0.712647		277	0.0249728	0.470291	0.402756	2	0.822148		122	0.0119328	0.263248	0.146214	2	0.866072		524	0.83973	0.965174	0.00113466	2	0.75364		184
315	0.0601649	0.644737	0.178931	2	0.876668		145	0.0765452	0.267477	0.19319	3	0.746653		327	0.431699	0.790076	0.0618104	3	0.731134		32	0.0224215	0.146718	0.385224	5	0.712647		278	0.0249728	0.471555	0.402677	2	0.822148		123	0.0119328	0.266667	0.145538	2	0.866072		525	0.839903	0.965174	0.00113435	2	0.75364		185
316	0.0620944	0.644737	0.171652	2	0.876668		146	0.0781826	0.267477	0.191539	3	0.746653		328	0.440743	0.790076	0.0590966	3	0.731134		33	0.0224215	0.15444	0.38331	5	0.712647		279	0.0269388	0.471555	0.396749	2	0.822148		124	0.0122689	0.266667	0.144074	2	0.866072		526	0.853907	0.965174	0.00100652	2	0.75364		186
317	0.0620944	0.646382	0.17137	2	0.876668		147	0.0781826	0.270517	0.19149	3	0.746653		329	0.440743	0.793893	0.0590574	3	0.731134		34	0.0239163	0.15444	0.376968	5	0.712647		280	0.0269388	0.472819	0.396425	2	0.822148		125	0.0122689	0.268376	0.141356	2	0.866072		527	0.85408	0.965174	0.00100643	2	0.75364		187
318	0.0645501	0.646382	0.166069	2	0.876668		148	0.0806386	0.270517	0.188405	3	0.746653		330	0.446216	0.793893	0.0576272	3	0.731134		35	0.0239163	0.162162	0.376432	5	0.712647		281	0.0273571	0.472819	0.39519	2	0.822148		126	0.012605	0.268376	0.132182	2	0.866072		528	0.855982	0.965174	0.000988107	2	0.75364		188
319	0.0649009	0.646382	0.166026	2	0.876668		149	0.0806386	0.276596	0.188005	3	0.746653		331	0.446216	0.79771	0.0575035	3	0.731134		36	0.0269058	0.162162	0.369121	5	0.712647		282	0.0273571	0.474083	0.395033	2	0.822148		127	0.0127731	0.268376	0.131324	2	0.866072		529	0.855982	0.970149	0.000987921	2	0.75364		189
320	0.0650763	0.646382	0.165947	2	0.876668		150	0.0808432	0.276596	0.187997	3	0.746653		332	0.456925	0.79771	0.0547792	3	0.731134		37	0.0269058	0.169884	0.366238	5	0.712647		283	0.0280683	0.474083	0.393415	2	0.822148		128	0.0131092	0.268376	0.129265	2	0.866072		530	0.875432	0.970149	0.000837923	2	0.75364		190
321	0.0650763	0.649671	0.165905	2	0.876668		151	0.0808432	0.279635	0.187633	3	0.746653		333	0.456925	0.801527	0.054764	3	0.731134		38	0.0276532	0.169884	0.365856	5	0.712647		284	0.0280683	0.475348	0.393375	2	0.822148		129	0.0131092	0.270085	0.128604	2	0.866072		531	0.875605	0.970149	0.000837711	2	0.75364		191
322	0.0661287	0.649671	0.16211	2	0.876668		152	0.119525	0.3769	0.1875	3	0.746653		334	0.480723	0.801527	0.0493977	3	0.731134		39	0.0276532	0.177606	0.362109	5	0.712647		285	0.0299088	0.475348	0.388398	2	0.822148		130	0.0131933	0.270085	0.128412	2	0.866072		532	0.880965	0.970149	0.000793317	2	0.75364		192
323	0.0661287	0.652961	0.161977	2	0.876668		153	0.119935	0.3769	0.187435	3	0.746653		335	0.480723	0.805344	0.0493642	3	0.731134		40	0.029148	0.177606	0.358837	5	0.712647		286	0.0299088	0.476612	0.388315	2	0.822148		131	0.0131933	0.271795	0.128176	2	0.866072		533	0.880965	0.975124	0.000792338	2	0.75364		193
324	0.0671812	0.652961	0.158786	2	0.876668		154	0.119935	0.382979	0.187271	3	0.746653		336	0.490481	0.805344	0.0475839	3	0.731134		41	0.029148	0.185328	0.357083	5	0.712647		287	0.0299506	0.476612	0.388261	2	0.822148		132	0.0133613	0.271795	0.127563	2	0.866072		534	0.892981	0.975124	0.000688692	2	0.75364		194
325	0.0671812	0.654605	0.158218	2	0.876668		155	0.121777	0.382979	0.186829	3	0.746653		337	0.490481	0.80916	0.0474941	3	0.731134		42	0.0328849	0.185328	0.347712	5	0.712647		288	0.0299506	0.477876	0.38813	2	0.822148		133	0.0135294	0.271795	0.125134	2	0.866072		535	0.892981	0.9801	0.000687728	2	0.75364		195
326	0.0719172	0.654605	0.151774	2	0.876668		156	0.121777	0.386018	0.186708	3	0.746653		338	0.490957	0.80916	0.0474154	3	0.731134		43	0.0328849	0.189189	0.344672	5	0.712647		289	0.0308291	0.477876	0.386109	2	0.822148		134	0.0136134	0.271795	0.125016	2	0.866072		536	0.893499	0.9801	0.000685767	2	0.75364		196
327	0.0719172	0.657895	0.151528	2	0.876668		157	0.123209	0.386018	0.186341	3	0.746653		339	0.497144	0.80916	0.0465836	3	0.731134		44	0.0373692	0.189189	0.338193	5	0.712647		290	0.0308291	0.47914	0.386109	2	0.822148		135	0.0162185	0.461538	0.125	2	0.866072		537	0.893499	0.985075	0.000684443	2	0.75364		197
328	0.0738467	0.657895	0.149787	2	0.876668		158	0.123209	0.389058	0.186316	3	0.746653		340	0.49762	0.80916	0.0465775	3	0.731134		45	0.0373692	0.19305	0.33772	5	0.712647		291	0.0328369	0.47914	0.380751	2	0.822148		136	0.0162185	0.466667	0.124689	2	0.866072		538	0.900761	0.985075	0.000628793	2	0.75364		198
329	0.0738467	0.659539	0.149564	2	0.876668		159	0.123823	0.389058	0.186001	3	0.746653		341	0.498096	0.80916	0.0462973	3	0.731134		46	0.0396114	0.19305	0.336066	5	0.712647		292	0.0328369	0.480405	0.380502	2	0.822148		137	0.0163025	0.466667	0.124594	2	0.866072		539	0.900761	0.99005	0.000628525	2	0.75364		199
330	0.0743729	0.659539	0.14896	2	0.876668		160	0.123823	0.392097	0.185995	3	0.746653		342	0.498096	0.812977	0.0462399	3	0.731134		47	0.0396114	0.196911	0.335699	5	0.712647		293	0.0332134	0.480405	0.379678	2	0.822148		138	0.0163025	0.468376	0.124468	2	0.866072		540	0.927732	0.99005	0.000445914	2	0.75364		200
331	0.0743729	0.661184	0.148521	2	0.876668		161	0.124437	0.392097	0.185801	3	0.746653		343	0.501666	0.812977	0.0450651	3	0.731134		48	0.0411061	0.196911	0.334023	5	0.712647		294	0.0332134	0.481669	0.379372	2	0.822148		139	0.0163866	0.468376	0.124384	2	0.866072		541	0.927905	0.99005	0.000445611	2	0.75364		201
332	0.0778811	0.661184	0.144171	2	0.876668		162	0.124437	0.395137	0.185792	3	0.746653		344	0.501666	0.816794	0.0450253	3	0.731134		49	0.0411061	0.204633	0.333533	5	0.712647		295	0.033799	0.481669	0.378415	2	0.822148		140	0.0163866	0.470085	0.124351	2	0.866072		542	0.952369	0.99005	0.000301138	2	0.75364		202
333	0.0782319	0.661184	0.144095	2	0.876668		163	0.124642	0.395137	0.185776	3	0.746653		345	0.50238	0.816794	0.0447782	3	0.731134		50	0.0418535	0.204633	0.331976	5	0.712647		296	0.033799	0.482933	0.378284	2	0.822148		141	0.0166387	0.470085	0.123915	2	0.866072		543	0.952369	0.995025	0.000300832	2	0.75364		203
334	0.0792843	0.661184	0.143374	2	0.876668		164	0.124642	0.398176	0.185765	3	0.746653		346	0.50238	0.820611	0.044762	3	0.731134		51	0.0418535	0.208494	0.330512	5	0.712647		297	0.0338409	0.482933	0.378227	2	0.822148		142	0.0166387	0.471795	0.123725	2	0.866072		544	0.952887	0.995025	0.000297864	2	0.75364		204
335	0.0792843	0.662829	0.143273	2	0.876668		165	0.12546	0.398176	0.18557	3	0.746653		347	0.503094	0.820611	0.0446669	3	0.731134		52	0.0455904	0.208494	0.328283	5	0.712647		298	0.0338409	0.484197	0.378184	2	0.822148		143	0.0167227	0.471795	0.123663	2	0.866072		545	0.95306	0.995025	0.000297073	2	0.75364		205
336	0.0840203	0.662829	0.137977	2	0.876668		166	0.12546	0.404255	0.185326	3	0.746653		348	0.50357	0.820611	0.0446132	3	0.731134		53	0.0455904	0.212355	0.327957	5	0.712647		299	0.034803	0.484197	0.376031	2	0.822148		144	0.0167227	0.473504	0.123389	2	0.866072		546	0.960581	0.995025	0.000247813	2	0.75364		206
337	0.0840203	0.664474	0.137927	2	0.876668		167	0.126279	0.404255	0.18519	3	0.746653		349	0.516659	0.820611	0.0422545	3	0.731134		54	0.0463378	0.212355	0.327563	5	0.712647		300	0.034803	0.485461	0.375753	2	0.822148		145	0.0172269	0.473504	0.122734	2	0.866072		547	0.960581	1	0.000247527	2	0.75364		207
338	0.084722	0.664474	0.136939	2	0.876668		168	0.126279	0.407295	0.18517	3	0.746653		350	0.516659	0.824427	0.0421678	3	0.731134		55	0.0463378	0.216216	0.326857	5	0.712647		301	0.0350121	0.485461	0.375231	2	0.822148		146	0.0172269	0.476923	0.122544	2	0.866072		548	0.964817	1	0.00022392	2	0.75364		208
339	0.084722	0.666118	0.13679	2	0.876668		169	0.126688	0.407295	0.185009	3	0.746653		351	0.519277	0.824427	0.0413745	3	0.731134		56	0.0493274	0.216216	0.324535	5	0.712647		302	0.0350121	0.486726	0.374954	2	0.822148		147	0.0172269	0.478632	0.122331	2	0.866072		549	0.96499	1	0.000222902	2	0.75364		209
340	0.0873531	0.666118	0.133932	2	0.876668		170	0.126688	0.413374	0.184989	3	0.746653		352	0.519277	0.828244	0.0413225	3	0.731134		57	0.0493274	0.220077	0.324226	5	0.712647		303	0.0356396	0.486726	0.373588	2	0.822148		148	0.0172269	0.482051	0.122152	2	0.866072		550	0.966459	1	0.000216577	2	0.75364		210
341	0.0873531	0.667763	0.133794	2	0.876668		171	0.127712	0.413374	0.184666	3	0.746653		353	0.522608	0.828244	0.0408469	3	0.731134		58	0.0523169	0.220077	0.321743	5	0.712647		304	0.0356396	0.48799	0.373437	2	0.822148		149	0.0177311	0.482051	0.120868	2	0.866072		551	0.966632	1	0.000216207	2	0.75364		211
342	0.0875285	0.667763	0.133782	2	0.876668		172	0.127712	0.416413	0.184637	3	0.746653		354	0.522608	0.832061	0.0408254	3	0.731134		59	0.0523169	0.223938	0.321297	5	0.712647		305	0.0356814	0.48799	0.373408	2	0.822148		150	0.0178992	0.482051	0.120587	2	0.866072		552	0.978562	1	0.000140943	2	0.75364		212
343	0.0875285	0.671053	0.133149	2	0.876668		173	0.12894	0.416413	0.184358	3	0.746653		355	0.525464	0.832061	0.0404085	3	0.731134		60	0.0575486	0.223938	0.317326	5	0.712647		306	0.0356814	0.489254	0.373293	2	0.822148		151	0.0180672	0.482051	0.120231	2	0.866072		553	0.978734	1	0.000139743	2	0.75364		213
344	0.0878793	0.671053	0.132925	2	0.876668		174	0.12894	0.419453	0.184312	3	0.746653		356	0.52594	0.832061	0.040401	3	0.731134		61	0.0575486	0.23166	0.316281	5	0.712647		307	0.0359742	0.489254	0.372682	2	0.822148		152	0.0180672	0.483761	0.120159	2	0.866072		554	1	1	2.10845e-07	2	0.75364		214
345	0.0878793	0.672697	0.132701	2	0.876668		175	0.129758	0.419453	0.184192	3	0.746653		357	0.531414	0.832061	0.0393225	3	0.731134		62	0.058296	0.23166	0.315898	5	0.712647		308	0.0359742	0.490518	0.372594	2	0.822148		153	0.0181513	0.483761	0.119996	2	0.866072		0	0	0	1.994	3	0.738759		215
346	0.0896334	0.672697	0.131167	2	0.876668		176	0.129758	0.422492	0.184177	3	0.746653		358	0.53189	0.832061	0.0392602	3	0.731134		63	0.058296	0.235521	0.315876	5	0.712647		309	0.0363925	0.490518	0.371579	2	0.822148		154	0.0181513	0.48547	0.119948	2	0.866072		1	0	0.00337838	0.994004	3	0.738759		216
347	0.0896334	0.674342	0.131128	2	0.876668		177	0.133647	0.422492	0.182877	3	0.746653		359	0.534031	0.832061	0.0386672	3	0.731134		64	0.0620329	0.235521	0.315208	5	0.712647		310	0.0363925	0.491783	0.371543	2	0.822148		155	0.0185714	0.48547	0.119384	2	0.866072		2	0.00010016	0.00337838	0.985922	3	0.738759		217
348	0.0899842	0.674342	0.130938	2	0.876668		178	0.133647	0.425532	0.182838	3	0.746653		360	0.534031	0.839695	0.0386329	3	0.731134		65	0.0620329	0.239382	0.315056	5	0.712647		311	0.036769	0.491783	0.370707	2	0.822148		156	0.0185714	0.487179	0.119336	2	0.866072		3	0.00010016	0.0101351	0.979871	3	0.738759		218
349	0.0899842	0.675987	0.130913	2	0.876668		179	0.135284	0.425532	0.182261	3	0.746653		361	0.535459	0.839695	0.0382474	3	0.731134		66	0.0657698	0.239382	0.313317	5	0.712647		312	0.036769	0.493047	0.370542	2	0.822148		157	0.0194118	0.487179	0.117933	2	0.866072		4	0.000600962	0.0101351	0.858496	3	0.738759		219
350	0.0906858	0.675987	0.130241	2	0.876668		180	0.135284	0.428571	0.182162	3	0.746653		362	0.535459	0.843511	0.0381623	3	0.731134		67	0.0657698	0.243243	0.312928	5	0.712647		313	0.0368108	0.493047	0.370523	2	0.822148		158	0.0194118	0.488889	0.117648	2	0.866072		5	0.000801282	0.0101351	0.856843	3	0.738759		220
351	0.0906858	0.677632	0.130112	2	0.876668		181	0.136512	0.428571	0.181907	3	0.746653		363	0.55545	0.843511	0.0352265	3	0.731134		68	0.0672646	0.243243	0.312651	5	0.712647		314	0.0368108	0.494311	0.370419	2	0.822148		159	0.0194958	0.488889	0.117356	2	0.866072		6	0.000901442	0.0101351	0.846864	3	0.738759		221
352	0.0912121	0.677632	0.129361	2	0.876668		182	0.136512	0.43465	0.18176	3	0.746653		364	0.55545	0.851145	0.0351811	3	0.731134		69	0.0672646	0.247104	0.31251	5	0.712647		315	0.0371873	0.494311	0.369389	2	0.822148		160	0.0194958	0.490598	0.117285	2	0.866072		7	0.00110176	0.0101351	0.8226	3	0.738759		222
353	0.0912121	0.679276	0.129297	2	0.876668		183	0.139378	0.43465	0.181236	3	0.746653		365	0.557592	0.851145	0.0348066	3	0.731134		70	0.151719	0.378378	0.3125	5	0.712647		316	0.0371873	0.495575	0.369327	2	0.822148		161	0.0195798	0.490598	0.117244	2	0.866072		8	0.00170272	0.0101351	0.760543	3	0.738759		223
354	0.093317	0.679276	0.127068	2	0.876668		184	0.139378	0.43769	0.181225	3	0.746653		366	0.557592	0.854962	0.0347277	3	0.731134		71	0.153214	0.378378	0.312392	5	0.712647		317	0.0374383	0.495575	0.369103	2	0.822148		162	0.0195798	0.492308	0.117042	2	0.866072		9	0.00190304	0.0101351	0.758128	3	0.738759		224
355	0.093317	0.680921	0.12652	2	0.876668		185	0.141424	0.43769	0.18022	3	0.746653		367	0.575916	0.854962	0.0323312	3	0.731134		72	0.153214	0.382239	0.312119	5	0.712647		318	0.0374383	0.496839	0.369094	2	0.822148		163	0.0197479	0.492308	0.116696	2	0.866072		10	0.00240385	0.0101351	0.688005	3	0.738759		225
356	0.0947202	0.680921	0.125774	2	0.876668		186	0.141834	0.43769	0.180184	3	0.746653		368	0.575916	0.858779	0.0322669	3	0.731134		73	0.156951	0.382239	0.311664	5	0.712647		319	0.0386096	0.496839	0.366378	2	0.822148		164	0.0197479	0.494017	0.116668	2	0.866072		11	0.00240385	0.0135135	0.681127	3	0.738759		226
357	0.095071	0.680921	0.125743	2	0.876668		187	0.142448	0.43769	0.179921	3	0.746653		369	0.587339	0.858779	0.0309097	3	0.731134		74	0.156951	0.3861	0.311615	5	0.712647		320	0.0386096	0.498104	0.366297	2	0.822148		165	0.02	0.494017	0.116301	2	0.866072		12	0.00260417	0.0135135	0.662371	3	0.738759		227
358	0.0954219	0.680921	0.125614	2	0.876668		188	0.142448	0.440729	0.17968	3	0.746653		370	0.587339	0.866412	0.030868	3	0.731134		75	0.158445	0.3861	0.31099	5	0.712647		321	0.041705	0.498104	0.359586	2	0.822148		166	0.02	0.497436	0.116235	2	0.866072		13	0.00280449	0.0135135	0.656361	3	0.738759		228
359	0.0954219	0.682566	0.125544	2	0.876668		189	0.142857	0.440729	0.179642	3	0.746653		371	0.596621	0.866412	0.029648	3	0.731134		76	0.158445	0.389961	0.309992	5	0.712647		322	0.041705	0.499368	0.359585	2	0.822148		167	0.0211765	0.497436	0.11373	2	0.866072		14	0.00280449	0.0168919	0.649958	3	0.738759		229
360	0.0959481	0.682566	0.12516	2	0.876668		190	0.142857	0.443769	0.179571	3	0.746653		372	0.596621	0.870229	0.0295603	3	0.731134		77	0.159193	0.389961	0.309662	5	0.712647		323	0.0421651	0.499368	0.358663	2	0.822148		168	0.0211765	0.500855	0.113645	2	0.866072		15	0.00290465	0.0168919	0.598997	3	0.738759		230
361	0.134889	0.720395	0.125	2	0.876668		191	0.145108	0.443769	0.179044	3	0.746653		373	0.608044	0.870229	0.0282697	3	0.731134		78	0.159193	0.393822	0.309609	5	0.712647		324	0.0421651	0.500632	0.358639	2	0.822148		169	0.0240336	0.500855	0.110495	2	0.866072		16	0.00290465	0.0202703	0.587427	3	0.738759		231
362	0.135415	0.720395	0.124886	2	0.876668		192	0.145108	0.446809	0.179001	3	0.746653		374	0.608044	0.874046	0.0281733	3	0.731134		79	0.15994	0.393822	0.309397	5	0.712647		325	0.0439639	0.500632	0.35491	2	0.822148		170	0.0240336	0.502564	0.110484	2	0.866072		17	0.00310497	0.0202703	0.584746	3	0.738759		232
363	0.135415	0.722039	0.124847	2	0.876668		193	0.146132	0.446809	0.178486	3	0.746653		375	0.620181	0.874046	0.0267319	3	0.731134		80	0.15994	0.401544	0.309201	5	0.712647		326	0.0439639	0.504425	0.354725	2	0.822148		171	0.0247899	0.502564	0.109456	2	0.866072		18	0.00310497	0.0236486	0.575222	3	0.738759		233
364	0.137169	0.722039	0.124492	2	0.876668		194	0.146541	0.446809	0.178477	3	0.746653		376	0.620181	0.877863	0.0267055	3	0.731134		81	0.160688	0.401544	0.308952	5	0.712647		327	0.0472266	0.504425	0.347794	2	0.822148		172	0.0247899	0.505983	0.109306	2	0.866072		19	0.00340545	0.0236486	0.534973	3	0.738759		234
365	0.137169	0.723684	0.124472	2	0.876668		195	0.147155	0.446809	0.178208	3	0.746653		377	0.627558	0.877863	0.0255968	3	0.731134		82	0.160688	0.405405	0.308877	5	0.712647		328	0.0472266	0.505689	0.347761	2	0.822148		173	0.0247899	0.509402	0.109298	2	0.866072		20	0.00340545	0.027027	0.484787	3	0.738759		235
366	0.140326	0.723684	0.12385	2	0.876668		196	0.147155	0.449848	0.178167	3	0.746653		378	0.627558	0.881679	0.0255832	3	0.731134		83	0.161435	0.405405	0.308777	5	0.712647		329	0.0524136	0.505689	0.336872	2	0.822148		174	0.0258824	0.509402	0.108247	2	0.866072		21	0.00641026	0.027027	0.286227	3	0.738759		236
367	0.140326	0.725329	0.123844	2	0.876668		197	0.148178	0.449848	0.177728	3	0.746653		379	0.628034	0.881679	0.0255429	3	0.731134		84	0.161435	0.413127	0.308426	5	0.712647		330	0.0524136	0.506953	0.33685	2	0.822148		175	0.0258824	0.511111	0.108138	2	0.866072		22	0.00641026	0.0304054	0.278835	3	0.738759		237
368	0.141028	0.725329	0.123713	2	0.876668		198	0.148178	0.452888	0.177688	3	0.746653		380	0.628034	0.885496	0.025538	3	0.731134		85	0.166667	0.413127	0.307263	5	0.712647		331	0.0537522	0.506953	0.334158	2	0.822148		176	0.0260504	0.511111	0.108076	2	0.866072		23	0.0073117	0.0304054	0.242022	3	0.738759		238
369	0.141028	0.726974	0.12368	2	0.876668		199	0.150634	0.452888	0.176576	3	0.746653		381	0.651594	0.885496	0.0228971	3	0.731134		86	0.166667	0.416988	0.307187	5	0.712647		332	0.0537522	0.508217	0.334114	2	0.822148		177	0.0262185	0.511111	0.108048	2	0.866072		24	0.00751202	0.0304054	0.240992	3	0.738759		239
370	0.141203	0.726974	0.123637	2	0.876668		200	0.150634	0.455927	0.17657	3	0.746653		382	0.651594	0.889313	0.0228756	3	0.731134		87	0.170404	0.416988	0.30596	5	0.712647		333	0.053794	0.508217	0.33387	2	0.822148		178	0.0263025	0.511111	0.107992	2	0.866072		25	0.00801282	0.0304054	0.22429	3	0.738759		240
371	0.141203	0.728618	0.123551	2	0.876668		201	0.152681	0.455927	0.175995	3	0.746653		383	0.651832	0.889313	0.0228619	3	0.731134		88	0.170404	0.420849	0.305909	5	0.712647		334	0.053794	0.509482	0.333823	2	0.822148		179	0.0263025	0.512821	0.107889	2	0.866072		26	0.00801282	0.0337838	0.221267	3	0.738759		241
372	0.14173	0.728618	0.123463	2	0.876668		202	0.152681	0.462006	0.175802	3	0.746653		384	0.651832	0.89313	0.0228318	3	0.731134		89	0.175635	0.420849	0.305211	5	0.712647		335	0.0540032	0.509482	0.33341	2	0.822148		180	0.0264706	0.512821	0.10786	2	0.866072		27	0.00811298	0.0337838	0.220474	3	0.738759		242
373	0.14173	0.730263	0.123447	2	0.876668		203	0.155342	0.462006	0.17496	3	0.746653		385	0.65326	0.89313	0.0226777	3	0.731134		90	0.175635	0.428571	0.304679	5	0.712647		336	0.0540032	0.510746	0.333352	2	0.822148		181	0.0264706	0.51453	0.107783	2	0.866072		28	0.0083133	0.0337838	0.218727	3	0.738759		243
374	0.142782	0.730263	0.123333	2	0.876668		204	0.155342	0.465046	0.174935	3	0.746653		386	0.65326	0.896947	0.0226617	3	0.731134		91	0.17713	0.428571	0.304327	5	0.712647		337	0.0540868	0.510746	0.333151	2	0.822148		182	0.0270588	0.51453	0.106467	2	0.866072		29	0.00851362	0.0337838	0.216445	3	0.738759		244
375	0.142782	0.731908	0.123326	2	0.876668		205	0.158821	0.465046	0.17329	3	0.746653		387	0.655878	0.896947	0.0224176	3	0.731134		92	0.17713	0.432432	0.304261	5	0.712647		338	0.0540868	0.51201	0.333108	2	0.822148		183	0.0270588	0.516239	0.106407	2	0.866072		30	0.00851362	0.0371622	0.216037	3	0.738759		245
376	0.143133	0.731908	0.123247	2	0.876668		206	0.158821	0.468085	0.173284	3	0.746653		388	0.655878	0.900763	0.0223872	3	0.731134		93	0.177877	0.432432	0.303769	5	0.712647		339	0.0565548	0.51201	0.328275	2	0.822148		184	0.027563	0.516239	0.105085	2	0.866072		31	0.0101162	0.0371622	0.187529	3	0.738759		246
377	0.143133	0.733553	0.12317	2	0.876668		207	0.160868	0.468085	0.171796	3	0.746653		389	0.666825	0.900763	0.0212015	3	0.731134		94	0.177877	0.440154	0.303589	5	0.712647		340	0.0565548	0.513274	0.328225	2	0.822148		185	0.027563	0.517949	0.104852	2	0.866072		32	0.0123197	0.0675676	0.1875	3	0.738759		247
378	0.145764	0.733553	0.122905	2	0.876668		208	0.160868	0.471125	0.171793	3	0.746653		390	0.666825	0.90458	0.0211713	3	0.731134		95	0.178625	0.440154	0.303569	5	0.712647		341	0.0570568	0.513274	0.327249	2	0.822148		186	0.0276471	0.517949	0.104569	2	0.866072		33	0.0123197	0.0709459	0.187033	3	0.738759		248
379	0.145764	0.735197	0.122875	2	0.876668		209	0.162505	0.471125	0.17142	3	0.746653		391	0.673489	0.90458	0.0205048	3	0.731134		96	0.178625	0.444015	0.303527	5	0.712647		342	0.0570568	0.514539	0.327245	2	0.822148		187	0.0276471	0.519658	0.104559	2	0.866072		34	0.0127204	0.0709459	0.185495	3	0.738759		249
380	0.146115	0.735197	0.122795	2	0.876668		210	0.162505	0.474164	0.17132	3	0.746653		392	0.673489	0.908397	0.0204775	3	0.731134		97	0.179372	0.444015	0.303178	5	0.712647		343	0.057266	0.514539	0.326903	2	0.822148		188	0.0277311	0.519658	0.104479	2	0.866072		35	0.0127204	0.0777027	0.184892	3	0.738759		250
381	0.146115	0.736842	0.122784	2	0.876668		211	0.16844	0.474164	0.168886	3	0.746653		393	0.674441	0.908397	0.0203767	3	0.731134		98	0.179372	0.447876	0.302933	5	0.712647		344	0.057266	0.515803	0.326901	2	0.822148		189	0.0277311	0.521368	0.104399	2	0.866072		36	0.0142228	0.0777027	0.179307	3	0.738759		251
382	0.146816	0.736842	0.122656	2	0.876668		212	0.16844	0.477204	0.168852	3	0.746653		394	0.674441	0.912214	0.0203166	3	0.731134		99	0.18012	0.447876	0.302927	5	0.712647		345	0.0573496	0.515803	0.32673	2	0.822148		190	0.0278151	0.521368	0.104384	2	0.866072		37	0.0142228	0.0810811	0.179235	3	0.738759		252
383	0.146816	0.738487	0.122562	2	0.876668		213	0.171715	0.477204	0.167385	3	0.746653		395	0.675393	0.912214	0.020096	3	0.731134		100	0.18012	0.451737	0.302857	5	0.712647		346	0.0573496	0.517067	0.326554	2	0.822148		191	0.0278151	0.523077	0.104363	2	0.866072		38	0.0147236	0.0810811	0.178823	3	0.738759		253
384	0.149974	0.738487	0.121918	2	0.876668		214	0.171715	0.480243	0.167359	3	0.746653		396	0.675869	0.912214	0.0200736	3	0.731134		101	0.183857	0.451737	0.30206	5	0.712647		347	0.0583117	0.517067	0.324374	2	0.822148		192	0.0278992	0.523077	0.104345	2	0.866072		39	0.0147236	0.0844595	0.178748	3	0.738759		254
385	0.149974	0.740132	0.121892	2	0.876668		215	0.172124	0.480243	0.167346	3	0.746653		397	0.676107	0.912214	0.0200732	3	0.731134		102	0.183857	0.455598	0.302042	5	0.712647		348	0.0583117	0.518331	0.324324	2	0.822148		193	0.0280672	0.523077	0.103834	2	0.866072		40	0.0176282	0.0844595	0.170582	3	0.738759		255
386	0.151202	0.740132	0.121508	2	0.876668		216	0.172124	0.483283	0.167291	3	0.746653		398	0.676107	0.916031	0.0200449	3	0.731134		103	0.192078	0.455598	0.299622	5	0.712647		349	0.0583954	0.518331	0.324158	2	0.822148		194	0.0284034	0.523077	0.102887	2	0.866072		41	0.0176282	0.0912162	0.170468	3	0.738759		256
387	0.151202	0.741776	0.121441	2	0.876668		217	0.175808	0.483283	0.165674	3	0.746653		399	0.683008	0.916031	0.0193703	3	0.731134		104	0.192078	0.459459	0.299467	5	0.712647		350	0.0583954	0.519595	0.324143	2	0.822148		195	0.0285714	0.523077	0.102832	2	0.866072		42	0.0207332	0.0912162	0.166023	3	0.738759		257
388	0.151552	0.741776	0.121411	2	0.876668		218	0.175808	0.495441	0.165229	3	0.746653		400	0.683484	0.916031	0.0193548	3	0.731134		105	0.202541	0.459459	0.297013	5	0.712647		351	0.0585627	0.519595	0.323893	2	0.822148		196	0.0285714	0.524786	0.102749	2	0.866072		43	0.0209335	0.0912162	0.166018	3	0.738759		258
389	0.151552	0.745066	0.121404	2	0.876668		219	0.184609	0.495441	0.161981	3	0.746653		401	0.692289	0.916031	0.0185939	3	0.731134		106	0.202541	0.46332	0.296944	5	0.712647		352	0.0585627	0.52086	0.323804	2	0.822148		197	0.0288235	0.524786	0.102149	2	0.866072		44	0.0219351	0.0912162	0.164309	3	0.738759		259
390	0.152605	0.745066	0.12122	2	0.876668		220	0.184609	0.50152	0.161701	3	0.746653		402	0.692289	0.919847	0.0185757	3	0.731134		107	0.203288	0.46332	0.296699	5	0.712647		353	0.059483	0.52086	0.321917	2	0.822148		198	0.0288235	0.528205	0.101976	2	0.866072		45	0.0219351	0.0945946	0.16407	3	0.738759		260
391	0.152605	0.746711	0.121173	2	0.876668		221	0.185223	0.50152	0.161541	3	0.746653		403	0.696811	0.919847	0.0182164	3	0.731134		108	0.203288	0.471042	0.296147	5	0.712647		354	0.059483	0.522124	0.321838	2	0.822148		199	0.0289076	0.528205	0.101815	2	0.866072		46	0.0220353	0.0945946	0.163841	3	0.738759		261
392	0.15699	0.746711	0.120422	2	0.876668		222	0.185223	0.507599	0.161385	3	0.746653		404	0.696811	0.923664	0.0181832	3	0.731134		109	0.207025	0.471042	0.295338	5	0.712647		355	0.0595666	0.522124	0.321647	2	0.822148		200	0.0289076	0.529915	0.101779	2	0.866072		47	0.0222356	0.0945946	0.163778	3	0.738759		262
393	0.15699	0.748355	0.120383	2	0.876668		223	0.187474	0.507599	0.160335	3	0.746653		405	0.706568	0.923664	0.0172434	3	0.731134		110	0.207025	0.474903	0.295093	5	0.712647		356	0.0595666	0.523388	0.321633	2	0.822148		201	0.0289916	0.529915	0.101627	2	0.866072		48	0.0233373	0.0945946	0.162113	3	0.738759		263
394	0.157165	0.748355	0.120368	2	0.876668		224	0.187474	0.510638	0.160322	3	0.746653		406	0.706568	0.927481	0.0172039	3	0.731134		111	0.212257	0.474903	0.293326	5	0.712647		357	0.0608634	0.523388	0.318661	2	0.822148		202	0.0289916	0.531624	0.101518	2	0.866072		49	0.0235377	0.0945946	0.162072	3	0.738759		264
395	0.157165	0.75	0.120352	2	0.876668		225	0.189112	0.510638	0.159732	3	0.746653		407	0.710138	0.927481	0.0168524	3	0.731134		112	0.212257	0.478764	0.292586	5	0.712647		358	0.0608634	0.524652	0.318551	2	0.822148		203	0.0295798	0.531624	0.100902	2	0.866072		50	0.0238381	0.0945946	0.16179	3	0.738759		265
396	0.157341	0.75	0.120188	2	0.876668		226	0.189112	0.513678	0.15968	3	0.746653		408	0.710138	0.931298	0.0168377	3	0.731134		113	0.216741	0.478764	0.291601	5	0.712647		359	0.0613235	0.524652	0.317816	2	0.822148		204	0.0295798	0.533333	0.100771	2	0.866072		51	0.0238381	0.097973	0.161674	3	0.738759		266
397	0.157341	0.751645	0.120186	2	0.876668		227	0.189521	0.513678	0.15959	3	0.746653		409	0.724893	0.931298	0.0158287	3	0.731134		114	0.216741	0.482625	0.291559	5	0.712647		360	0.0613235	0.525917	0.317775	2	0.822148		205	0.0302521	0.533333	0.0995072	2	0.866072		52	0.0239383	0.097973	0.161623	3	0.738759		267
398	0.159446	0.751645	0.119761	2	0.876668		228	0.189521	0.516717	0.159495	3	0.746653		410	0.725607	0.931298	0.0158228	3	0.731134		115	0.224215	0.482625	0.288108	5	0.712647		361	0.0638333	0.525917	0.313336	2	0.822148		206	0.0302521	0.536752	0.0994534	2	0.866072		53	0.0239383	0.101351	0.161523	3	0.738759		268
399	0.159446	0.753289	0.119714	2	0.876668		229	0.189726	0.516717	0.159475	3	0.746653		411	0.733936	0.931298	0.0151031	3	0.731134		116	0.224215	0.486486	0.287763	5	0.712647		362	0.0638333	0.527181	0.313247	2	0.822148		207	0.0302521	0.538462	0.0994265	2	0.866072		54	0.0245393	0.101351	0.159701	3	0.738759		269
400	0.160849	0.753289	0.119458	2	0.876668		230	0.189726	0.519757	0.159443	3	0.746653		412	0.733936	0.935115	0.015095	3	0.731134		117	0.224963	0.486486	0.287511	5	0.712647		363	0.0650046	0.527181	0.310957	2	0.822148		208	0.0304202	0.538462	0.0990221	2	0.866072		55	0.0245393	0.10473	0.15961	3	0.738759		270
401	0.160849	0.754934	0.119334	2	0.876668		231	0.190135	0.519757	0.159371	3	0.746653		413	0.738458	0.935115	0.0145507	3	0.731134		118	0.224963	0.490347	0.287339	5	0.712647		364	0.0650046	0.528445	0.310904	2	0.822148		209	0.0304202	0.540171	0.0989937	2	0.866072		56	0.0251402	0.10473	0.157628	3	0.738759		271
402	0.161375	0.754934	0.119224	2	0.876668		232	0.190544	0.519757	0.159222	3	0.746653		414	0.738458	0.938931	0.0145416	3	0.731134		119	0.22571	0.490347	0.286341	5	0.712647		365	0.0650883	0.528445	0.310868	2	0.822148		210	0.0305882	0.540171	0.0989917	2	0.866072		57	0.0251402	0.108108	0.157278	3	0.738759		272
403	0.161375	0.756579	0.119221	2	0.876668		233	0.193205	0.519757	0.158196	3	0.746653		415	0.739648	0.938931	0.0144387	3	0.731134		120	0.22571	0.494208	0.286321	5	0.712647		366	0.0650883	0.529709	0.310755	2	0.822148		211	0.0308403	0.540171	0.09879	2	0.866072		58	0.0254407	0.108108	0.156576	3	0.738759		273
404	0.164006	0.756579	0.1186	2	0.876668		234	0.193205	0.522796	0.158014	3	0.746653		416	0.739648	0.942748	0.0143699	3	0.731134		121	0.229447	0.494208	0.2857	5	0.712647		367	0.0663013	0.529709	0.309327	2	0.822148		212	0.0308403	0.54188	0.0987302	2	0.866072		59	0.0254407	0.111486	0.156544	3	0.738759		274
405	0.164006	0.759868	0.118459	2	0.876668		235	0.194024	0.522796	0.157771	3	0.746653		417	0.741076	0.942748	0.0142944	3	0.731134		122	0.229447	0.498069	0.285533	5	0.712647		368	0.0663013	0.530973	0.3093	2	0.822148		213	0.0310924	0.54188	0.0986719	2	0.866072		60	0.025641	0.111486	0.155975	3	0.738759		275
406	0.168918	0.759868	0.11733	2	0.876668		236	0.194024	0.525836	0.157584	3	0.746653		418	0.741076	0.946565	0.01428	3	0.731134		123	0.234679	0.498069	0.28353	5	0.712647		369	0.0670125	0.530973	0.3079	2	0.822148		214	0.0310924	0.54359	0.0986256	2	0.866072		61	0.0258413	0.111486	0.155752	3	0.738759		276
407	0.168918	0.761513	0.117242	2	0.876668		237	0.199754	0.525836	0.155196	3	0.746653		419	0.742504	0.946565	0.0140303	3	0.731134		124	0.234679	0.505792	0.282793	5	0.712647		370	0.0670125	0.532238	0.307834	2	0.822148		215	0.0310924	0.547009	0.0985917	2	0.866072		62	0.0263421	0.111486	0.154331	3	0.738759		277
408	0.170496	0.761513	0.116757	2	0.876668		238	0.199754	0.528875	0.15519	3	0.746653		420	0.742504	0.950382	0.0140197	3	0.731134		125	0.235426	0.505792	0.282311	5	0.712647		371	0.0686857	0.532238	0.30464	2	0.822148		216	0.0318487	0.547009	0.0979411	2	0.866072		63	0.0265425	0.111486	0.154247	3	0.738759		278
409	0.170496	0.763158	0.116672	2	0.876668		239	0.201596	0.528875	0.154618	3	0.746653		421	0.747025	0.950382	0.0137214	3	0.731134		126	0.235426	0.509653	0.282283	5	0.712647		372	0.0686857	0.533502	0.304582	2	0.822148		217	0.0318487	0.548718	0.0979114	2	0.866072		64	0.0269431	0.111486	0.153223	3	0.738759		279
410	0.170672	0.763158	0.11664	2	0.876668		240	0.201596	0.531915	0.154589	3	0.746653		422	0.747025	0.954198	0.0137028	3	0.731134		127	0.23991	0.509653	0.28109	5	0.712647		373	0.0706517	0.533502	0.301286	2	0.822148		218	0.0322689	0.548718	0.0971412	2	0.866072		65	0.0269431	0.114865	0.152964	3	0.738759		280
411	0.170672	0.764803	0.116623	2	0.876668		241	0.20221	0.531915	0.154554	3	0.746653		423	0.757734	0.954198	0.0128293	3	0.731134		128	0.23991	0.513514	0.280835	5	0.712647		374	0.0706517	0.534766	0.30124	2	0.822148		219	0.0322689	0.550427	0.0970876	2	0.866072		66	0.0278446	0.114865	0.151546	3	0.738759		281
412	0.170847	0.764803	0.116497	2	0.876668		242	0.20221	0.534954	0.154404	3	0.746653		424	0.757734	0.958015	0.0127477	3	0.731134		129	0.240658	0.513514	0.280727	5	0.712647		375	0.0707354	0.534766	0.301087	2	0.822148		220	0.032521	0.550427	0.0968445	2	0.866072		67	0.0278446	0.118243	0.151512	3	0.738759		282
413	0.170847	0.766447	0.116464	2	0.876668		243	0.205894	0.534954	0.152885	3	0.746653		425	0.779867	0.958015	0.0111393	3	0.731134		130	0.240658	0.517375	0.280659	5	0.712647		376	0.0707354	0.53603	0.301076	2	0.822148		221	0.032521	0.552137	0.0967897	2	0.866072		68	0.0280449	0.118243	0.151217	3	0.738759		283
414	0.174355	0.766447	0.115527	2	0.876668		244	0.205894	0.537994	0.152881	3	0.746653		426	0.779867	0.961832	0.0111392	3	0.731134		131	0.245142	0.517375	0.279352	5	0.712647		377	0.0729524	0.53603	0.297976	2	0.822148		222	0.0326891	0.552137	0.0966705	2	0.866072		69	0.0280449	0.121622	0.150805	3	0.738759		284
415	0.174355	0.768092	0.115522	2	0.876668		245	0.207122	0.537994	0.152597	3	0.746653		427	0.790576	0.961832	0.010505	3	0.731134		132	0.245142	0.521236	0.278819	5	0.712647		378	0.0729524	0.537295	0.297968	2	0.822148		223	0.0326891	0.555556	0.0963749	2	0.866072		70	0.0285457	0.121622	0.149261	3	0.738759		285
416	0.175057	0.768092	0.115243	2	0.876668		246	0.207122	0.541033	0.152496	3	0.746653		428	0.790576	0.965649	0.0104754	3	0.731134		133	0.251121	0.521236	0.276431	5	0.712647		379	0.0755459	0.537295	0.292972	2	0.822148		224	0.0337815	0.555556	0.0949641	2	0.866072		71	0.0285457	0.125	0.14914	3	0.738759		286
417	0.175408	0.768092	0.114884	2	0.876668		247	0.207941	0.541033	0.152089	3	0.746653		429	0.803665	0.965649	0.00966427	3	0.731134		134	0.251121	0.525097	0.275847	5	0.712647		380	0.0755459	0.538559	0.292963	2	0.822148		225	0.0337815	0.557265	0.0949533	2	0.866072		72	0.028746	0.125	0.148533	3	0.738759		287
418	0.182073	0.768092	0.113139	2	0.876668		248	0.207941	0.544073	0.151894	3	0.746653		430	0.803665	0.969466	0.00961483	3	0.731134		135	0.254111	0.525097	0.274041	5	0.712647		381	0.076257	0.538559	0.291035	2	0.822148		226	0.0362185	0.557265	0.0929062	2	0.866072		73	0.028746	0.128378	0.148491	3	0.738759		288
419	0.182073	0.769737	0.112986	2	0.876668		249	0.211011	0.544073	0.150657	3	0.746653		431	0.820324	0.969466	0.00872246	3	0.731134		136	0.254111	0.528958	0.273915	5	0.712647		382	0.076257	0.539823	0.291008	2	0.822148		227	0.0362185	0.560684	0.0926099	2	0.866072		74	0.0289463	0.128378	0.148185	3	0.738759		289
420	0.195404	0.769737	0.108963	2	0.876668		250	0.211011	0.547112	0.150649	3	0.746653		432	0.820324	0.973282	0.00867969	3	0.731134		137	0.255605	0.528958	0.273443	5	0.712647		383	0.0763825	0.539823	0.29073	2	0.822148		228	0.0368908	0.560684	0.0917758	2	0.866072		75	0.0289463	0.131757	0.148095	3	0.738759		290
421	0.195404	0.771382	0.10884	2	0.876668		251	0.212034	0.547112	0.150133	3	0.746653		433	0.823893	0.973282	0.00834427	3	0.731134		138	0.255605	0.53668	0.271705	5	0.712647		384	0.0763825	0.541087	0.290725	2	0.822148		229	0.0368908	0.564103	0.0915225	2	0.866072		76	0.0292468	0.131757	0.147986	3	0.738759		291
422	0.195755	0.771382	0.108798	2	0.876668		252	0.212034	0.550152	0.150069	3	0.746653		434	0.823893	0.977099	0.00829041	3	0.731134		139	0.260837	0.53668	0.270339	5	0.712647		385	0.0770518	0.541087	0.289862	2	0.822148		230	0.0370588	0.564103	0.0913221	2	0.866072		77	0.0292468	0.135135	0.147938	3	0.738759		292
423	0.195755	0.773026	0.108714	2	0.876668		253	0.214081	0.550152	0.149328	3	0.746653		435	0.829843	0.977099	0.00787603	3	0.731134		140	0.260837	0.544402	0.269502	5	0.712647		386	0.0770518	0.542351	0.289827	2	0.822148		231	0.0370588	0.565812	0.0912576	2	0.866072		78	0.0295473	0.135135	0.147415	3	0.738759		293
424	0.197334	0.773026	0.108315	2	0.876668		254	0.214081	0.553191	0.149225	3	0.746653		436	0.830319	0.977099	0.00786615	3	0.731134		141	0.261584	0.544402	0.269263	5	0.712647		387	0.0777211	0.542351	0.288577	2	0.822148		232	0.0373109	0.565812	0.0908943	2	0.866072		79	0.0295473	0.138514	0.147368	3	0.738759		294
425	0.197334	0.774671	0.108221	2	0.876668		255	0.215309	0.553191	0.148745	3	0.746653		437	0.845312	0.977099	0.00715177	3	0.731134		142	0.261584	0.548263	0.268974	5	0.712647		388	0.0777211	0.543616	0.28857	2	0.822148		233	0.0373109	0.567521	0.09089	2	0.866072		80	0.0297476	0.138514	0.147084	3	0.738759		295
426	0.198211	0.774671	0.107905	2	0.876668		256	0.215718	0.553191	0.148615	3	0.746653		438	0.845312	0.980916	0.00714203	3	0.731134		143	0.265321	0.548263	0.267225	5	0.712647		389	0.078474	0.543616	0.28741	2	0.822148		234	0.037563	0.567521	0.0905346	2	0.866072		81	0.0297476	0.141892	0.146867	3	0.738759		296
427	0.198211	0.776316	0.107881	2	0.876668		257	0.215923	0.553191	0.148491	3	0.746653		439	0.872204	0.980916	0.00558599	3	0.731134		144	0.265321	0.555985	0.266952	5	0.712647		390	0.078474	0.54488	0.287385	2	0.822148		235	0.0377311	0.567521	0.090405	2	0.866072		82	0.0298478	0.141892	0.146651	3	0.738759		297
428	0.198386	0.776316	0.107801	2	0.876668		258	0.215923	0.556231	0.14835	3	0.746653		440	0.872204	0.984733	0.00558423	3	0.731134		145	0.268311	0.555985	0.266221	5	0.712647		391	0.0791433	0.54488	0.286453	2	0.822148		236	0.0392437	0.567521	0.0893498	2	0.866072		83	0.0298478	0.148649	0.146249	3	0.738759		298
429	0.198386	0.777961	0.107762	2	0.876668		259	0.221858	0.556231	0.144679	3	0.746653		441	0.97049	0.984733	0.001055	3	0.731134		146	0.268311	0.559846	0.266133	5	0.712647		392	0.0791433	0.546144	0.286341	2	0.822148		237	0.0392437	0.569231	0.0893324	2	0.866072		84	0.030649	0.148649	0.144393	3	0.738759		299
430	0.198562	0.777961	0.107694	2	0.876668		260	0.221858	0.559271	0.144633	3	0.746653		442	0.97049	0.98855	0.00103942	3	0.731134		147	0.269058	0.559846	0.266025	5	0.712647		393	0.0792688	0.546144	0.286044	2	0.822148		238	0.0418487	0.569231	0.0874406	2	0.866072		85	0.030649	0.152027	0.14413	3	0.738759		300
431	0.198562	0.78125	0.10759	2	0.876668		261	0.222268	0.559271	0.144193	3	0.746653		443	0.974298	0.98855	0.000940148	3	0.731134		148	0.269058	0.567568	0.265738	5	0.712647		394	0.0792688	0.547408	0.286033	2	0.822148		239	0.0420168	0.569231	0.0873355	2	0.866072		86	0.0319511	0.152027	0.141796	3	0.738759		301
432	0.200842	0.78125	0.10689	2	0.876668		262	0.222268	0.56231	0.144048	3	0.746653		444	0.974298	0.992366	0.000937946	3	0.731134		149	0.278774	0.567568	0.259479	5	0.712647		395	0.0798126	0.547408	0.285517	2	0.822148		240	0.0423529	0.569231	0.0871612	2	0.866072		87	0.0319511	0.155405	0.141619	3	0.738759		302
433	0.200842	0.782895	0.106881	2	0.876668		263	0.222677	0.56231	0.143957	3	0.746653		445	0.977392	0.992366	0.000864659	3	0.731134		150	0.278774	0.571429	0.259031	5	0.712647		396	0.0798126	0.548673	0.285045	2	0.822148		241	0.0423529	0.57094	0.0869486	2	0.866072		88	0.0348558	0.155405	0.136983	3	0.738759		303
434	0.202596	0.782895	0.106458	2	0.876668		264	0.222677	0.56535	0.143945	3	0.746653		446	0.977392	0.996183	0.000862191	3	0.731134		151	0.281016	0.571429	0.25876	5	0.712647		397	0.0806492	0.548673	0.284151	2	0.822148		242	0.0431092	0.57094	0.0862778	2	0.866072		89	0.0348558	0.158784	0.136886	3	0.738759		304
435	0.202596	0.784539	0.106453	2	0.876668		265	0.227384	0.56535	0.141604	3	0.746653		447	0.985245	0.996183	0.00063072	3	0.731134		152	0.281016	0.57529	0.25865	5	0.712647		398	0.0806492	0.549937	0.284087	2	0.822148		243	0.0431092	0.57265	0.0862258	2	0.866072		90	0.0372596	0.158784	0.134025	3	0.738759		305
436	0.203473	0.784539	0.106317	2	0.876668		266	0.227794	0.56535	0.141549	3	0.746653		448	0.985245	1	0.000629206	3	0.731134		153	0.282511	0.57529	0.257594	5	0.712647		399	0.0825734	0.549937	0.281041	2	0.822148		244	0.0445378	0.57265	0.0856388	2	0.866072		91	0.0372596	0.165541	0.133926	3	0.738759		306
437	0.203473	0.786184	0.106295	2	0.876668		267	0.227998	0.56535	0.14151	3	0.746653		449	1	1	7.44265e-05	3	0.731134		154	0.282511	0.579151	0.25734	5	0.712647		400	0.0825734	0.551201	0.28087	2	0.822148		245	0.0445378	0.574359	0.0856177	2	0.866072		92	0.0377604	0.165541	0.132752	3	0.738759		307
438	0.204175	0.786184	0.106195	2	0.876668		268	0.227998	0.568389	0.141388	3	0.746653		0	0	0	1.99947	4	0.72323		155	0.284006	0.579151	0.256241	5	0.712647		401	0.0826989	0.551201	0.280746	2	0.822148		246	0.045042	0.574359	0.0853232	2	0.866072		93	0.0377604	0.168919	0.132722	3	0.738759		308
439	0.204876	0.786184	0.106081	2	0.876668		269	0.235366	0.568389	0.137852	3	0.746653		1	0	0.00597015	0.999467	4	0.72323		156	0.284006	0.583012	0.25613	5	0.712647		402	0.0826989	0.552465	0.280716	2	0.822148		247	0.045042	0.576068	0.0853128	2	0.866072		94	0.0411659	0.168919	0.129524	3	0.738759		309
440	0.207157	0.786184	0.105292	2	0.876668		270	0.235366	0.571429	0.137794	3	0.746653		2	0	0.00895522	0.998852	4	0.72323		157	0.284753	0.583012	0.256068	5	0.712647		403	0.0842048	0.552465	0.278817	2	0.822148		248	0.0461345	0.576068	0.0847378	2	0.866072		95	0.0411659	0.172297	0.129478	3	0.738759		310
441	0.207157	0.787829	0.10529	2	0.876668		271	0.237208	0.571429	0.136986	3	0.746653		3	0.000286779	0.00895522	0.997951	4	0.72323		158	0.284753	0.586873	0.255679	5	0.712647		404	0.0842048	0.553729	0.27877	2	0.822148		249	0.0461345	0.577778	0.0847227	2	0.866072		96	0.0413662	0.172297	0.129417	3	0.738759		311
442	0.214348	0.787829	0.103078	2	0.876668		272	0.237208	0.574468	0.136912	3	0.746653		4	0.000286779	0.0238806	0.992397	4	0.72323		159	0.286248	0.586873	0.255361	5	0.712647		405	0.0842466	0.553729	0.278684	2	0.822148		250	0.0462185	0.577778	0.0846692	2	0.866072		97	0.0413662	0.175676	0.129339	3	0.738759		312
443	0.214348	0.789474	0.103059	2	0.876668		273	0.238232	0.574468	0.136139	3	0.746653		5	0.000573559	0.0238806	0.989389	4	0.72323		160	0.286248	0.590734	0.254802	5	0.712647		406	0.0842466	0.556258	0.278512	2	0.822148		251	0.0462185	0.579487	0.0845265	2	0.866072		98	0.0421675	0.175676	0.12863	3	0.738759		313
444	0.215576	0.789474	0.102642	2	0.876668		274	0.238641	0.574468	0.136132	3	0.746653		6	0.000573559	0.0268657	0.973641	4	0.72323		161	0.286996	0.590734	0.254328	5	0.712647		407	0.0851669	0.556258	0.277391	2	0.822148		252	0.0464706	0.579487	0.0842915	2	0.866072		99	0.0421675	0.182432	0.128426	3	0.738759		314
445	0.215576	0.792763	0.102587	2	0.876668		275	0.23946	0.574468	0.135543	3	0.746653		7	0.00114712	0.0268657	0.957761	4	0.72323		162	0.286996	0.594595	0.25416	5	0.712647		408	0.0851669	0.557522	0.277337	2	0.822148		253	0.0464706	0.582906	0.0841661	2	0.866072		100	0.0428686	0.182432	0.127985	3	0.738759		315
446	0.216453	0.792763	0.102297	2	0.876668		276	0.23946	0.580547	0.135416	3	0.746653		8	0.00114712	0.0328358	0.954898	4	0.72323		163	0.295217	0.594595	0.24844	5	0.712647		409	0.0874258	0.557522	0.273752	2	0.822148		254	0.0470588	0.582906	0.0839391	2	0.866072		101	0.0428686	0.185811	0.127969	3	0.738759		316
447	0.216453	0.794408	0.102271	2	0.876668		277	0.240483	0.580547	0.134884	3	0.746653		9	0.00114712	0.0358209	0.936865	4	0.72323		164	0.295217	0.598456	0.248258	5	0.712647		410	0.0874258	0.558786	0.273705	2	0.822148		255	0.0470588	0.584615	0.0839091	2	0.866072		102	0.0441707	0.185811	0.127004	3	0.738759		317
448	0.217155	0.794408	0.1022	2	0.876668		278	0.240483	0.583587	0.134734	3	0.746653		10	0.0014339	0.0358209	0.916961	4	0.72323		165	0.299701	0.598456	0.245385	5	0.712647		411	0.0883879	0.558786	0.272827	2	0.822148		256	0.05	0.584615	0.0819049	2	0.866072		103	0.0441707	0.189189	0.12679	3	0.738759		318
449	0.217155	0.796053	0.102186	2	0.876668		279	0.247237	0.583587	0.131492	3	0.746653		11	0.0014339	0.038806	0.915902	4	0.72323		166	0.299701	0.602317	0.245261	5	0.712647		412	0.0883879	0.561315	0.272777	2	0.822148		257	0.05	0.586325	0.0819049	2	0.866072		104	0.0454728	0.189189	0.12571	3	0.738759		319
450	0.218383	0.796053	0.101932	2	0.876668		280	0.247237	0.586626	0.131396	3	0.746653		12	0.00229424	0.038806	0.872199	4	0.72323		167	0.300448	0.602317	0.245248	5	0.712647		413	0.0906049	0.561315	0.270209	2	0.822148		258	0.0501681	0.586325	0.0817768	2	0.866072		105	0.0454728	0.192568	0.125662	3	0.738759		320
451	0.218383	0.797697	0.101921	2	0.876668		281	0.247851	0.586626	0.13119	3	0.746653		13	0.00229424	0.0447761	0.864654	4	0.72323		168	0.300448	0.606178	0.245047	5	0.712647		414	0.0906049	0.562579	0.270134	2	0.822148		259	0.0501681	0.588034	0.0817364	2	0.866072		106	0.0484776	0.192568	0.122857	3	0.738759		321
452	0.219435	0.797697	0.101691	2	0.876668		282	0.247851	0.589666	0.13106	3	0.746653		14	0.00258102	0.0447761	0.863228	4	0.72323		169	0.309417	0.606178	0.241207	5	0.712647		415	0.0906885	0.562579	0.270064	2	0.822148		260	0.0504202	0.588034	0.0816316	2	0.866072		107	0.0484776	0.195946	0.122857	3	0.738759		322
453	0.219435	0.799342	0.101664	2	0.876668		283	0.249079	0.589666	0.13076	3	0.746653		15	0.00258102	0.0477612	0.860036	4	0.72323		170	0.309417	0.610039	0.241055	5	0.712647		416	0.0906885	0.563843	0.269917	2	0.822148		261	0.0504202	0.589744	0.0816097	2	0.866072		108	0.0488782	0.195946	0.122524	3	0.738759		323
454	0.222417	0.799342	0.100438	2	0.876668		284	0.249079	0.592705	0.130729	3	0.746653		16	0.00315457	0.0477612	0.845166	4	0.72323		171	0.313901	0.610039	0.237887	5	0.712647		417	0.090814	0.563843	0.269857	2	0.822148		262	0.0531933	0.589744	0.0797201	2	0.866072		109	0.0488782	0.199324	0.122414	3	0.738759		324
455	0.222417	0.800987	0.100433	2	0.876668		285	0.249693	0.592705	0.130436	3	0.746653		17	0.00315457	0.0507463	0.826308	4	0.72323		172	0.313901	0.6139	0.237668	5	0.712647		418	0.090814	0.565107	0.269774	2	0.822148		263	0.0531933	0.591453	0.0796545	2	0.866072		110	0.0490785	0.199324	0.122335	3	0.738759		325
456	0.222768	0.800987	0.100089	2	0.876668		286	0.249693	0.595745	0.13039	3	0.746653		18	0.00372813	0.0507463	0.821262	4	0.72323		173	0.320628	0.6139	0.236006	5	0.712647		419	0.0913578	0.565107	0.269265	2	0.822148		264	0.0532773	0.591453	0.0794962	2	0.866072		111	0.0490785	0.202703	0.122197	3	0.738759		326
457	0.222768	0.802632	0.100046	2	0.876668		287	0.250512	0.595745	0.130289	3	0.746653		19	0.00372813	0.0537313	0.818126	4	0.72323		174	0.320628	0.617761	0.235646	5	0.712647		420	0.0913578	0.566372	0.269198	2	0.822148		265	0.0534454	0.591453	0.0794371	2	0.866072		112	0.0512821	0.202703	0.119852	3	0.738759		327
458	0.222943	0.802632	0.0999341	2	0.876668		288	0.250512	0.598784	0.130034	3	0.746653		20	0.00401491	0.0537313	0.815382	4	0.72323		175	0.333333	0.617761	0.231966	5	0.712647		421	0.0958337	0.566372	0.263658	2	0.822148		266	0.0536975	0.591453	0.0791898	2	0.866072		113	0.0512821	0.206081	0.119849	3	0.738759		328
459	0.222943	0.804276	0.0998571	2	0.876668		289	0.251944	0.598784	0.129523	3	0.746653		21	0.00401491	0.0567164	0.80351	4	0.72323		176	0.333333	0.621622	0.231438	5	0.712647		422	0.0958337	0.567636	0.26363	2	0.822148		267	0.0536975	0.593162	0.0790814	2	0.866072		114	0.0515825	0.206081	0.11958	3	0.738759		329
460	0.223996	0.804276	0.0991635	2	0.876668		290	0.251944	0.601824	0.129514	3	0.746653		22	0.00688271	0.0567164	0.70419	4	0.72323		177	0.335575	0.621622	0.23084	5	0.712647		423	0.0961265	0.567636	0.263199	2	0.822148		268	0.0557983	0.593162	0.0780878	2	0.866072		115	0.0515825	0.209459	0.119482	3	0.738759		330
461	0.224347	0.804276	0.099077	2	0.876668		291	0.255833	0.601824	0.128357	3	0.746653		23	0.00688271	0.0597015	0.697678	4	0.72323		178	0.335575	0.625483	0.230334	5	0.712647		424	0.0961265	0.5689	0.263134	2	0.822148		269	0.0557983	0.596581	0.078065	2	0.866072		116	0.0519832	0.209459	0.11924	3	0.738759		331
462	0.224697	0.804276	0.0989789	2	0.876668		292	0.255833	0.604863	0.128262	3	0.746653		24	0.0083166	0.0597015	0.659116	4	0.72323		179	0.336323	0.625483	0.229754	5	0.712647		425	0.0970049	0.5689	0.262107	2	0.822148		270	0.0560504	0.596581	0.0778658	2	0.866072		117	0.0521835	0.209459	0.119156	3	0.738759		332
463	0.224697	0.805921	0.0989	2	0.876668		293	0.257266	0.604863	0.127649	3	0.746653		25	0.0083166	0.0626866	0.648997	4	0.72323		180	0.336323	0.629344	0.229656	5	0.712647		426	0.0970049	0.570164	0.262088	2	0.822148		271	0.0560504	0.598291	0.0778528	2	0.866072		118	0.0540865	0.209459	0.117468	3	0.738759		333
464	0.236625	0.805921	0.0942935	2	0.876668		294	0.257266	0.607903	0.127527	3	0.746653		26	0.0100373	0.0626866	0.622045	4	0.72323		181	0.33707	0.629344	0.229604	5	0.712647		427	0.0970886	0.570164	0.262045	2	0.822148		272	0.0563025	0.598291	0.0777207	2	0.866072		119	0.0540865	0.212838	0.117439	3	0.738759		334
465	0.236625	0.807566	0.0942584	2	0.876668		295	0.261154	0.607903	0.126573	3	0.746653		27	0.0100373	0.0656716	0.619947	4	0.72323		182	0.33707	0.633205	0.228944	5	0.712647		428	0.0970886	0.571429	0.262022	2	0.822148		273	0.0563025	0.6	0.0776838	2	0.866072		120	0.0560897	0.212838	0.116004	3	0.738759		335
466	0.236801	0.807566	0.0941985	2	0.876668		296	0.261154	0.610942	0.126506	3	0.746653		28	0.0106108	0.0656716	0.618373	4	0.72323		183	0.340807	0.633205	0.225905	5	0.712647		429	0.0981344	0.571429	0.260384	2	0.822148		274	0.0571429	0.6	0.0773363	2	0.866072		121	0.0560897	0.219595	0.115883	3	0.738759		336
467	0.236801	0.810855	0.094194	2	0.876668		297	0.261564	0.610942	0.126233	3	0.746653		29	0.0106108	0.0716418	0.5987	4	0.72323		184	0.340807	0.640927	0.225693	5	0.712647		430	0.0981344	0.572693	0.26025	2	0.822148		275	0.0571429	0.601709	0.0773208	2	0.866072		122	0.0563902	0.219595	0.115732	3	0.738759		337
468	0.24522	0.810855	0.0919014	2	0.876668		298	0.261564	0.613982	0.126199	3	0.746653		30	0.0120447	0.0716418	0.548885	4	0.72323		185	0.344544	0.640927	0.224853	5	0.712647		431	0.0998076	0.572693	0.258196	2	0.822148		276	0.0572269	0.601709	0.0772732	2	0.866072		123	0.0563902	0.222973	0.115716	3	0.738759		338
469	0.24522	0.8125	0.0918625	2	0.876668		299	0.264429	0.613982	0.125067	3	0.746653		31	0.0120447	0.0776119	0.536793	4	0.72323		186	0.344544	0.644788	0.224556	5	0.712647		432	0.0998076	0.573957	0.258184	2	0.822148		277	0.0572269	0.603419	0.0772555	2	0.866072		124	0.0598958	0.222973	0.113402	3	0.738759		339
470	0.245746	0.8125	0.0917245	2	0.876668		300	0.264429	0.617021	0.125027	3	0.746653		32	0.0149125	0.0776119	0.467151	4	0.72323		187	0.35426	0.644788	0.220562	5	0.712647		433	0.100184	0.573957	0.257786	2	0.822148		278	0.0604202	0.603419	0.0759598	2	0.866072		125	0.0598958	0.226351	0.113293	3	0.738759		340
471	0.245746	0.814145	0.091716	2	0.876668		301	0.275072	0.617021	0.121504	3	0.746653		33	0.0149125	0.080597	0.455047	4	0.72323		188	0.35426	0.648649	0.219503	5	0.712647		434	0.100184	0.575221	0.257777	2	0.822148		279	0.0604202	0.605128	0.0759413	2	0.866072		126	0.060597	0.226351	0.113017	3	0.738759		341
472	0.24715	0.814145	0.0913312	2	0.876668		302	0.275072	0.620061	0.121494	3	0.746653		34	0.0151993	0.080597	0.455043	4	0.72323		189	0.358744	0.648649	0.21778	5	0.712647		435	0.101062	0.575221	0.256608	2	0.822148		280	0.0609244	0.605128	0.0756805	2	0.866072		127	0.060597	0.22973	0.112916	3	0.738759		342
473	0.24715	0.815789	0.0912749	2	0.876668		303	0.277732	0.620061	0.120753	3	0.746653		35	0.0151993	0.0835821	0.449839	4	0.72323		190	0.358744	0.65251	0.217473	5	0.712647		436	0.101062	0.576485	0.256586	2	0.822148		281	0.0609244	0.606838	0.0755285	2	0.866072		128	0.0611979	0.22973	0.112499	3	0.738759		343
474	0.247325	0.815789	0.091273	2	0.876668		304	0.277732	0.6231	0.120587	3	0.746653		36	0.01692	0.0835821	0.437623	4	0.72323		191	0.372197	0.65251	0.211277	5	0.712647		437	0.103154	0.576485	0.254005	2	0.822148		282	0.0616807	0.606838	0.0753444	2	0.866072		129	0.0611979	0.233108	0.112481	3	0.738759		344
475	0.247325	0.817434	0.0911734	2	0.876668		305	0.280188	0.6231	0.119871	3	0.746653		37	0.0174935	0.0835821	0.435253	4	0.72323		192	0.372197	0.656371	0.210844	5	0.712647		438	0.103154	0.57775	0.253963	2	0.822148		283	0.0616807	0.608547	0.0752773	2	0.866072		130	0.0621995	0.233108	0.111969	3	0.738759		345
476	0.248027	0.817434	0.0907595	2	0.876668		306	0.280188	0.62614	0.119726	3	0.746653		38	0.0189274	0.0835821	0.421932	4	0.72323		193	0.375187	0.656371	0.208498	5	0.712647		439	0.104618	0.57775	0.252278	2	0.822148		284	0.0621008	0.608547	0.0750314	2	0.866072		131	0.0623998	0.233108	0.111852	3	0.738759		346
477	0.248377	0.817434	0.0907544	2	0.876668		307	0.282235	0.62614	0.119322	3	0.746653		39	0.0189274	0.0865672	0.416716	4	0.72323		194	0.375187	0.660232	0.208301	5	0.712647		440	0.104618	0.579014	0.25226	2	0.822148		285	0.0621008	0.610256	0.0750038	2	0.866072		132	0.0627003	0.233108	0.111648	3	0.738759		347
478	0.249781	0.817434	0.0903621	2	0.876668		308	0.282235	0.629179	0.119295	3	0.746653		40	0.019501	0.0865672	0.40135	4	0.72323		195	0.390882	0.660232	0.20304	5	0.712647		441	0.107295	0.579014	0.249623	2	0.822148		286	0.0630252	0.610256	0.0746458	2	0.866072		133	0.0627003	0.236486	0.111619	3	0.738759		348
479	0.249781	0.820724	0.0902772	2	0.876668		309	0.283463	0.629179	0.118976	3	0.746653		41	0.0215085	0.0865672	0.385695	4	0.72323		196	0.390882	0.664093	0.20249	5	0.712647		442	0.107295	0.580278	0.24954	2	0.822148		287	0.0631933	0.610256	0.0745681	2	0.866072		134	0.0640024	0.236486	0.11045	3	0.738759		349
480	0.251184	0.820724	0.0899585	2	0.876668		310	0.283463	0.632219	0.118852	3	0.746653		42	0.0215085	0.0895522	0.385534	4	0.72323		197	0.393871	0.664093	0.201658	5	0.712647		443	0.107714	0.580278	0.24928	2	0.822148		288	0.064958	0.610256	0.0736331	2	0.866072		135	0.0640024	0.239865	0.110438	3	0.738759		350
481	0.251184	0.822368	0.0898224	2	0.876668		311	0.287966	0.632219	0.117531	3	0.746653		43	0.0217952	0.0895522	0.38526	4	0.72323		198	0.393871	0.667954	0.201654	5	0.712647		444	0.107714	0.581542	0.249232	2	0.822148		289	0.064958	0.611966	0.0736256	2	0.866072		136	0.0669071	0.239865	0.107907	3	0.738759		351
482	0.252236	0.822368	0.0896331	2	0.876668		312	0.287966	0.635258	0.117502	3	0.746653		44	0.0217952	0.0925373	0.38406	4	0.72323		199	0.395366	0.667954	0.200661	5	0.712647		445	0.112608	0.581542	0.243642	2	0.822148		290	0.0682353	0.611966	0.0718689	2	0.866072		137	0.0671074	0.239865	0.107764	3	0.738759		352
483	0.252587	0.822368	0.0895879	2	0.876668		313	0.288784	0.635258	0.117157	3	0.746653		45	0.0235159	0.0925373	0.376082	4	0.72323		200	0.395366	0.671815	0.200535	5	0.712647		446	0.112608	0.584071	0.243616	2	0.822148		291	0.0684034	0.611966	0.071843	2	0.866072		138	0.0672075	0.239865	0.107756	3	0.738759		353
484	0.257674	0.822368	0.0876583	2	0.876668		314	0.288784	0.638298	0.117012	3	0.746653		46	0.0235159	0.0985075	0.371564	4	0.72323		201	0.396114	0.671815	0.200506	5	0.712647		447	0.11265	0.584071	0.243551	2	0.822148		292	0.0689076	0.611966	0.0715477	2	0.866072		139	0.0672075	0.243243	0.107747	3	0.738759		354
485	0.257674	0.824013	0.0876364	2	0.876668		315	0.289194	0.638298	0.116786	3	0.746653		47	0.0266705	0.0985075	0.356488	4	0.72323		202	0.396114	0.675676	0.199797	5	0.712647		448	0.11265	0.585335	0.243527	2	0.822148		293	0.0689076	0.613675	0.0714326	2	0.866072		140	0.0676082	0.243243	0.107086	3	0.738759		355
486	0.258025	0.824013	0.0875329	2	0.876668		316	0.289603	0.638298	0.116749	3	0.746653		48	0.0266705	0.104478	0.353923	4	0.72323		203	0.399851	0.675676	0.198293	5	0.712647		449	0.112733	0.585335	0.243431	2	0.822148		294	0.0689916	0.613675	0.0713909	2	0.866072		141	0.0676082	0.246622	0.106736	3	0.738759		356
487	0.258025	0.827303	0.0873734	2	0.876668		317	0.290626	0.638298	0.11651	3	0.746653		49	0.0281044	0.104478	0.338891	4	0.72323		204	0.399851	0.679537	0.198087	5	0.712647		450	0.112733	0.586599	0.243389	2	0.822148		295	0.0689916	0.615385	0.0711572	2	0.866072		142	0.0678085	0.246622	0.106434	3	0.738759		357
488	0.259604	0.827303	0.0869574	2	0.876668		318	0.290626	0.641337	0.116441	3	0.746653		50	0.0281044	0.107463	0.338628	4	0.72323		205	0.403587	0.679537	0.196746	5	0.712647		451	0.112984	0.586599	0.242929	2	0.822148		296	0.0691597	0.615385	0.0710478	2	0.866072		143	0.0678085	0.25	0.106417	3	0.738759		358
489	0.259604	0.828947	0.0869264	2	0.876668		319	0.301269	0.641337	0.112668	3	0.746653		51	0.0283912	0.107463	0.33317	4	0.72323		206	0.403587	0.683398	0.196699	5	0.712647		452	0.112984	0.587863	0.242921	2	0.822148		297	0.0691597	0.618803	0.0710147	2	0.866072		144	0.0679087	0.25	0.106234	3	0.738759		359
490	0.264866	0.828947	0.0855658	2	0.876668		320	0.301269	0.644377	0.112621	3	0.746653		52	0.0283912	0.110448	0.331278	4	0.72323		207	0.40583	0.683398	0.196197	5	0.712647		453	0.113863	0.587863	0.24213	2	0.822148		298	0.0692437	0.618803	0.0709558	2	0.866072		145	0.0679087	0.253378	0.106169	3	0.738759		360
491	0.264866	0.830592	0.0855079	2	0.876668		321	0.301678	0.644377	0.112587	3	0.746653		53	0.0289647	0.110448	0.330128	4	0.72323		208	0.40583	0.687259	0.195836	5	0.712647		454	0.113863	0.589128	0.242116	2	0.822148		299	0.0692437	0.620513	0.0709444	2	0.866072		146	0.0685096	0.253378	0.105925	3	0.738759		361
492	0.273461	0.830592	0.0835448	2	0.876668		322	0.301678	0.647416	0.11257	3	0.746653		54	0.0292515	0.110448	0.329097	4	0.72323		209	0.414798	0.687259	0.191652	5	0.712647		455	0.114072	0.589128	0.241793	2	0.822148		300	0.0693277	0.620513	0.0709143	2	0.866072		147	0.0685096	0.256757	0.105902	3	0.738759		362
493	0.273461	0.832237	0.0834822	2	0.876668		323	0.303111	0.647416	0.111829	3	0.746653		55	0.0292515	0.116418	0.327247	4	0.72323		210	0.414798	0.69112	0.191648	5	0.712647		456	0.114072	0.590392	0.241793	2	0.822148		301	0.0693277	0.622222	0.0707792	2	0.866072		148	0.0746194	0.256757	0.102588	3	0.738759		363
494	0.2796	0.832237	0.0818547	2	0.876668		324	0.303111	0.650456	0.111749	3	0.746653		56	0.0306854	0.116418	0.322094	4	0.72323		211	0.423767	0.69112	0.188691	5	0.712647		457	0.114365	0.590392	0.241564	2	0.822148		302	0.0698319	0.622222	0.0706166	2	0.866072		149	0.0746194	0.260135	0.102563	3	0.738759		364
495	0.279951	0.832237	0.0817807	2	0.876668		325	0.30352	0.650456	0.111567	3	0.746653		57	0.0306854	0.119403	0.321431	4	0.72323		212	0.423767	0.694981	0.188665	5	0.712647		458	0.114365	0.591656	0.24147	2	0.822148		303	0.0698319	0.623932	0.0706011	2	0.866072		150	0.0765224	0.260135	0.101437	3	0.738759		365
496	0.285739	0.832237	0.0804668	2	0.876668		326	0.30352	0.653495	0.111547	3	0.746653		58	0.0326929	0.119403	0.312473	4	0.72323		213	0.426756	0.694981	0.187781	5	0.712647		459	0.123735	0.591656	0.231797	2	0.822148		304	0.0753782	0.623932	0.0683923	2	0.866072		151	0.0765224	0.263514	0.101384	3	0.738759		366
497	0.285739	0.833882	0.080391	2	0.876668		327	0.305362	0.653495	0.110883	3	0.746653		59	0.0326929	0.125373	0.310048	4	0.72323		214	0.426756	0.698842	0.187702	5	0.712647		460	0.123735	0.59292	0.231667	2	0.822148		305	0.0753782	0.625641	0.0683751	2	0.866072		152	0.0772236	0.263514	0.10099	3	0.738759		367
498	0.287493	0.833882	0.0801068	2	0.876668		328	0.305362	0.659574	0.110821	3	0.746653		60	0.0329796	0.125373	0.30991	4	0.72323		215	0.427504	0.698842	0.187658	5	0.712647		461	0.12386	0.59292	0.231515	2	0.822148		306	0.0761345	0.625641	0.0680507	2	0.866072		153	0.0772236	0.266892	0.100938	3	0.738759		368
499	0.287493	0.835526	0.0799531	2	0.876668		329	0.305976	0.659574	0.110504	3	0.746653		61	0.0329796	0.128358	0.308623	4	0.72323		216	0.427504	0.702703	0.187616	5	0.712647		462	0.12386	0.594185	0.231507	2	0.822148		307	0.0761345	0.62906	0.0680362	2	0.866072		154	0.0776242	0.266892	0.100753	3	0.738759		369
500	0.28837	0.835526	0.0798432	2	0.876668		330	0.305976	0.662614	0.110497	3	0.746653		62	0.0335532	0.128358	0.307443	4	0.72323		217	0.428999	0.702703	0.186877	5	0.712647		463	0.124237	0.594185	0.231243	2	0.822148		308	0.0769748	0.62906	0.0676075	2	0.866072		155	0.0776242	0.27027	0.100708	3	0.738759		370
501	0.28837	0.837171	0.079817	2	0.876668		331	0.306795	0.662614	0.110274	3	0.746653		63	0.0335532	0.131343	0.306635	4	0.72323		218	0.428999	0.706564	0.186732	5	0.712647		464	0.124237	0.595449	0.231204	2	0.822148		309	0.0769748	0.630769	0.0675893	2	0.866072		156	0.0786258	0.27027	0.100148	3	0.738759		371
502	0.295738	0.837171	0.0783998	2	0.876668		332	0.306795	0.665653	0.110223	3	0.746653		64	0.03384	0.131343	0.306155	4	0.72323		219	0.429746	0.706564	0.186653	5	0.712647		465	0.124655	0.595449	0.230933	2	0.822148		310	0.0779832	0.630769	0.0671684	2	0.866072		157	0.0786258	0.273649	0.100027	3	0.738759		372
503	0.295738	0.838816	0.0783344	2	0.876668		333	0.309456	0.665653	0.109337	3	0.746653		65	0.03384	0.134328	0.304765	4	0.72323		220	0.429746	0.710425	0.186248	5	0.712647		466	0.124655	0.596713	0.230915	2	0.822148		311	0.0779832	0.632479	0.067139	2	0.866072		158	0.0790264	0.273649	0.0998641	3	0.738759		373
504	0.296264	0.838816	0.0781246	2	0.876668		334	0.309456	0.668693	0.109328	3	0.746653		66	0.0349871	0.134328	0.299136	4	0.72323		221	0.435725	0.710425	0.184742	5	0.712647		467	0.125492	0.596713	0.229908	2	0.822148		312	0.0788235	0.632479	0.0667636	2	0.866072		159	0.0790264	0.277027	0.0998523	3	0.738759		374
505	0.296615	0.838816	0.0781111	2	0.876668		335	0.310684	0.668693	0.108848	3	0.746653		67	0.0349871	0.137313	0.298636	4	0.72323		222	0.435725	0.714286	0.184735	5	0.712647		468	0.125492	0.597977	0.229851	2	0.822148		313	0.0788235	0.634188	0.0666846	2	0.866072		160	0.0820312	0.277027	0.0984003	3	0.738759		375
506	0.296615	0.840461	0.0780079	2	0.876668		336	0.310684	0.671733	0.108767	3	0.746653		68	0.0367078	0.137313	0.293132	4	0.72323		223	0.43722	0.714286	0.183836	5	0.712647		469	0.126914	0.597977	0.228458	2	0.822148		314	0.0791597	0.634188	0.066576	2	0.866072		161	0.0820312	0.280405	0.0983645	3	0.738759		376
507	0.298544	0.840461	0.0772475	2	0.876668		337	0.316005	0.671733	0.106791	3	0.746653		69	0.0367078	0.143284	0.289746	4	0.72323		224	0.43722	0.718147	0.18379	5	0.712647		470	0.126914	0.600506	0.228391	2	0.822148		315	0.0791597	0.635897	0.0665682	2	0.866072		162	0.0823317	0.280405	0.0981385	3	0.738759		377
508	0.298544	0.842105	0.0771995	2	0.876668		338	0.316005	0.674772	0.106657	3	0.746653		70	0.0384284	0.143284	0.285518	4	0.72323		225	0.439462	0.718147	0.182732	5	0.712647		471	0.127039	0.600506	0.228203	2	0.822148		316	0.082605	0.635897	0.0653267	2	0.866072		163	0.0823317	0.283784	0.0981192	3	0.738759		378
509	0.299947	0.842105	0.0767605	2	0.876668		339	0.317847	0.674772	0.105921	3	0.746653		71	0.0384284	0.146269	0.285097	4	0.72323		226	0.439462	0.722008	0.182637	5	0.712647		472	0.127039	0.60177	0.228181	2	0.822148		317	0.082605	0.637607	0.065311	2	0.866072		164	0.0836338	0.283784	0.0970551	3	0.738759		379
510	0.299947	0.84375	0.0767505	2	0.876668		340	0.317847	0.677812	0.105884	3	0.746653		72	0.039002	0.146269	0.283317	4	0.72323		227	0.440957	0.722008	0.181684	5	0.712647		473	0.128336	0.60177	0.226797	2	0.822148		318	0.0854622	0.637607	0.0638402	2	0.866072		165	0.0836338	0.287162	0.0969558	3	0.738759		380
511	0.306437	0.84375	0.0751122	2	0.876668		341	0.320098	0.677812	0.104924	3	0.746653		73	0.039002	0.149254	0.281747	4	0.72323		228	0.440957	0.725869	0.181278	5	0.712647		474	0.128336	0.603034	0.226785	2	0.822148		319	0.0854622	0.639316	0.0638191	2	0.866072		166	0.0874399	0.287162	0.0950088	3	0.738759		381
512	0.306437	0.845395	0.0750807	2	0.876668		342	0.320098	0.680851	0.104908	3	0.746653		74	0.0407227	0.149254	0.278029	4	0.72323		229	0.44843	0.725869	0.178148	5	0.712647		475	0.129214	0.603034	0.226122	2	0.822148		320	0.0872269	0.639316	0.0632599	2	0.866072		167	0.0876402	0.287162	0.0948404	3	0.738759		382
513	0.308016	0.845395	0.0746926	2	0.876668		343	0.320917	0.680851	0.104523	3	0.746653		75	0.0407227	0.152239	0.277513	4	0.72323		230	0.44843	0.72973	0.177989	5	0.712647		476	0.129214	0.604298	0.226066	2	0.822148		321	0.087395	0.639316	0.063227	2	0.866072		168	0.0897436	0.287162	0.0935702	3	0.738759		383
514	0.308016	0.847039	0.0746025	2	0.876668		344	0.320917	0.683891	0.104494	3	0.746653		76	0.0410095	0.152239	0.276006	4	0.72323		231	0.452167	0.72973	0.176541	5	0.712647		477	0.129716	0.604298	0.225445	2	0.822148		322	0.0876471	0.639316	0.0630972	2	0.866072		169	0.0897436	0.290541	0.0935599	3	0.738759		384
515	0.309244	0.847039	0.0743779	2	0.876668		345	0.321531	0.683891	0.104127	3	0.746653		77	0.0410095	0.155224	0.275308	4	0.72323		232	0.452167	0.733591	0.176473	5	0.712647		478	0.129716	0.605563	0.225443	2	0.822148		323	0.0876471	0.641026	0.0630598	2	0.866072		170	0.0909455	0.290541	0.0931953	3	0.738759		385
516	0.309244	0.848684	0.0743649	2	0.876668		346	0.321531	0.68693	0.104024	3	0.746653		78	0.0478922	0.155224	0.264668	4	0.72323		233	0.470852	0.733591	0.170143	5	0.712647		479	0.131515	0.605563	0.223819	2	0.822148		324	0.0894958	0.641026	0.0623802	2	0.866072		171	0.0909455	0.293919	0.0931927	3	0.738759		386
517	0.311524	0.848684	0.0739222	2	0.876668		347	0.32194	0.68693	0.103976	3	0.746653		79	0.0478922	0.158209	0.264332	4	0.72323		234	0.470852	0.737452	0.169179	5	0.712647		480	0.131515	0.606827	0.223811	2	0.822148		325	0.0894958	0.642735	0.0623733	2	0.866072		172	0.0915465	0.293919	0.0927852	3	0.738759		387
518	0.311524	0.850329	0.0738941	2	0.876668		348	0.32235	0.68693	0.103852	3	0.746653		80	0.048179	0.158209	0.264208	4	0.72323		235	0.472347	0.737452	0.169068	5	0.712647		481	0.132017	0.606827	0.223454	2	0.822148		326	0.0915126	0.642735	0.0616921	2	0.866072		173	0.0915465	0.297297	0.0927095	3	0.738759		388
519	0.312928	0.850329	0.0733956	2	0.876668		349	0.322964	0.68693	0.103665	3	0.746653		81	0.048179	0.161194	0.264154	4	0.72323		236	0.472347	0.741313	0.168669	5	0.712647		482	0.132017	0.608091	0.223376	2	0.822148		327	0.0915126	0.644444	0.0616885	2	0.866072		174	0.0917468	0.297297	0.0925581	3	0.738759		389
520	0.313278	0.850329	0.0733058	2	0.876668		350	0.322964	0.68997	0.103577	3	0.746653		82	0.0516203	0.161194	0.259041	4	0.72323		237	0.476831	0.741313	0.166562	5	0.712647		483	0.134109	0.608091	0.221087	2	0.822148		328	0.0916807	0.644444	0.0616469	2	0.866072		175	0.0917468	0.300676	0.0925328	3	0.738759		390
521	0.315208	0.850329	0.0728977	2	0.876668		351	0.325829	0.68997	0.102411	3	0.746653		83	0.0516203	0.164179	0.258945	4	0.72323		238	0.476831	0.745174	0.166222	5	0.712647		484	0.134109	0.609355	0.220998	2	0.822148		329	0.0930252	0.644444	0.0611879	2	0.866072		176	0.093149	0.300676	0.0918795	3	0.738759		391
522	0.315208	0.851974	0.0728937	2	0.876668		352	0.326238	0.68997	0.102372	3	0.746653		84	0.0519071	0.164179	0.25846	4	0.72323		239	0.477578	0.745174	0.166075	5	0.712647		485	0.134443	0.609355	0.220569	2	0.822148		330	0.0930252	0.646154	0.06118	2	0.866072		177	0.093149	0.304054	0.09177	3	0.738759		392
523	0.315383	0.851974	0.0728917	2	0.876668		353	0.327876	0.68997	0.101958	3	0.746653		85	0.0519071	0.167164	0.258427	4	0.72323		240	0.477578	0.749035	0.166036	5	0.712647		486	0.134443	0.610619	0.220448	2	0.822148		331	0.0942017	0.646154	0.0606277	2	0.866072		178	0.0941506	0.304054	0.0909557	3	0.738759		393
524	0.315383	0.853618	0.0728851	2	0.876668		354	0.327876	0.693009	0.101958	3	0.746653		86	0.0570691	0.167164	0.250964	4	0.72323		241	0.479821	0.749035	0.16503	5	0.712647		487	0.139379	0.610619	0.215996	2	0.822148		332	0.0943697	0.646154	0.0604836	2	0.866072		179	0.0941506	0.307432	0.0907747	3	0.738759		394
525	0.320996	0.853618	0.0712306	2	0.876668		355	0.32808	0.693009	0.101621	3	0.746653		87	0.0570691	0.173134	0.250466	4	0.72323		242	0.479821	0.752896	0.16501	5	0.712647		488	0.139379	0.611884	0.215969	2	0.822148		333	0.0967227	0.646154	0.0597967	2	0.866072		180	0.0965545	0.307432	0.089695	3	0.738759		395
526	0.320996	0.855263	0.0711044	2	0.876668		356	0.32808	0.696049	0.101507	3	0.746653		88	0.0573559	0.173134	0.250458	4	0.72323		243	0.481315	0.752896	0.164946	5	0.712647		489	0.139923	0.611884	0.215493	2	0.822148		334	0.0967227	0.647863	0.0597832	2	0.866072		181	0.0965545	0.310811	0.0896749	3	0.738759		396
527	0.325908	0.855263	0.069682	2	0.876668		357	0.330946	0.696049	0.0999715	3	0.746653		89	0.0960711	0.286567	0.25	4	0.72323		244	0.485052	0.752896	0.163613	5	0.712647		490	0.139923	0.613148	0.215445	2	0.822148		335	0.0973109	0.647863	0.0596497	2	0.866072		182	0.0970553	0.310811	0.0894745	3	0.738759		397
528	0.325908	0.856908	0.069663	2	0.876668		358	0.330946	0.699088	0.0999592	3	0.746653		90	0.0969315	0.286567	0.249785	4	0.72323		245	0.485052	0.756757	0.163021	5	0.712647		491	0.141345	0.613148	0.21412	2	0.822148		336	0.0973109	0.649573	0.0596432	2	0.866072		183	0.0970553	0.314189	0.0894648	3	0.738759		398
529	0.327311	0.856908	0.0694179	2	0.876668		359	0.333197	0.699088	0.0991961	3	0.746653		91	0.0969315	0.292537	0.249695	4	0.72323		246	0.494768	0.756757	0.158617	5	0.712647		492	0.141345	0.614412	0.214083	2	0.822148		337	0.097479	0.649573	0.0594701	2	0.866072		184	0.0973558	0.314189	0.0892052	3	0.738759		399
530	0.327311	0.858553	0.0693492	2	0.876668		360	0.333197	0.702128	0.0990967	3	0.746653		92	0.0986521	0.292537	0.249105	4	0.72323		247	0.494768	0.76834	0.157668	5	0.712647		493	0.141554	0.614412	0.21398	2	0.822148		338	0.097479	0.651282	0.0594676	2	0.866072		185	0.0973558	0.317568	0.0892014	3	0.738759		400
531	0.334152	0.858553	0.0679273	2	0.876668		361	0.333811	0.702128	0.099018	3	0.746653		93	0.0986521	0.295522	0.248944	4	0.72323		248	0.496263	0.76834	0.1572	5	0.712647		494	0.141554	0.615676	0.213946	2	0.822148		339	0.0993277	0.651282	0.058946	2	0.866072		186	0.0995593	0.317568	0.0881761	3	0.738759		401
532	0.334152	0.860197	0.0678477	2	0.876668		362	0.333811	0.708207	0.0990031	3	0.746653		94	0.100373	0.295522	0.248251	4	0.72323		249	0.496263	0.776062	0.156424	5	0.712647		495	0.141764	0.615676	0.2138	2	0.822148		340	0.0993277	0.652991	0.0588514	2	0.866072		187	0.0995593	0.320946	0.0881656	3	0.738759		402
533	0.334327	0.860197	0.0676951	2	0.876668		363	0.34384	0.708207	0.0959266	3	0.746653		95	0.100373	0.298507	0.247994	4	0.72323		250	0.499253	0.776062	0.155059	5	0.712647		496	0.141764	0.616941	0.213664	2	0.822148		341	0.0994958	0.652991	0.0587841	2	0.866072		188	0.0997596	0.320946	0.0880746	3	0.738759		403
534	0.334327	0.861842	0.0676715	2	0.876668		364	0.34384	0.711246	0.0959219	3	0.746653		96	0.10066	0.298507	0.247734	4	0.72323		251	0.499253	0.779923	0.155041	5	0.712647		497	0.14352	0.616941	0.212017	2	0.822148		342	0.0994958	0.654701	0.0587771	2	0.866072		189	0.0997596	0.327703	0.087953	3	0.738759		404
535	0.338011	0.861842	0.0666589	2	0.876668		365	0.346296	0.711246	0.0948443	3	0.746653		97	0.10066	0.301493	0.247723	4	0.72323		252	0.5	0.779923	0.15482	5	0.712647		498	0.14352	0.618205	0.212002	2	0.822148		343	0.0997479	0.654701	0.0587093	2	0.866072		190	0.100361	0.327703	0.0878515	3	0.738759		405
536	0.338011	0.863487	0.0666395	2	0.876668		366	0.346296	0.714286	0.0947899	3	0.746653		98	0.10152	0.301493	0.247517	4	0.72323		253	0.5	0.783784	0.15405	5	0.712647		499	0.144859	0.618205	0.210628	2	0.822148		344	0.0997479	0.65641	0.0586353	2	0.866072		191	0.100361	0.331081	0.0878161	3	0.738759		406
537	0.349763	0.863487	0.063951	2	0.876668		367	0.3465	0.714286	0.0946174	3	0.746653		99	0.10152	0.304478	0.247509	4	0.72323		254	0.500747	0.783784	0.153507	5	0.712647		500	0.144859	0.619469	0.210607	2	0.822148		345	0.100084	0.65641	0.0585676	2	0.866072		192	0.101462	0.331081	0.0871267	3	0.738759		407
538	0.349763	0.865132	0.0639479	2	0.876668		368	0.3465	0.717325	0.0946009	3	0.746653		100	0.102093	0.304478	0.247366	4	0.72323		255	0.500747	0.787645	0.153376	5	0.712647		501	0.145152	0.619469	0.210167	2	0.822148		346	0.100084	0.659829	0.0585402	2	0.866072		193	0.101462	0.334459	0.0871241	3	0.738759		408
539	0.353271	0.865132	0.0630783	2	0.876668		369	0.348342	0.717325	0.0939495	3	0.746653		101	0.102093	0.310448	0.247102	4	0.72323		256	0.502242	0.787645	0.153291	5	0.712647		502	0.145152	0.620733	0.210163	2	0.822148		347	0.101429	0.659829	0.058063	2	0.866072		194	0.101663	0.334459	0.0870944	3	0.738759		409
540	0.353271	0.866776	0.0630673	2	0.876668		370	0.348342	0.720365	0.09386	3	0.746653		102	0.10238	0.310448	0.247022	4	0.72323		257	0.502242	0.791506	0.153014	5	0.712647		503	0.148666	0.620733	0.206847	2	0.822148		348	0.101429	0.661538	0.0580413	2	0.866072		195	0.101663	0.337838	0.087062	3	0.738759		410
541	0.354675	0.866776	0.062633	2	0.876668		371	0.34998	0.720365	0.0930351	3	0.746653		103	0.10238	0.319403	0.246741	4	0.72323		258	0.504484	0.791506	0.152393	5	0.712647		504	0.148666	0.621997	0.206841	2	0.822148		349	0.102857	0.661538	0.0575995	2	0.866072		196	0.103165	0.337838	0.0864334	3	0.738759		411
542	0.354675	0.868421	0.0625734	2	0.876668		372	0.34998	0.723404	0.0930249	3	0.746653		104	0.102667	0.319403	0.246679	4	0.72323		259	0.504484	0.795367	0.152044	5	0.712647		505	0.151468	0.621997	0.204269	2	0.822148		350	0.102857	0.663248	0.0575889	2	0.866072		197	0.103165	0.341216	0.0863833	3	0.738759		412
543	0.355025	0.868421	0.0625525	2	0.876668		373	0.352845	0.723404	0.092032	3	0.746653		105	0.102667	0.325373	0.246652	4	0.72323		260	0.505232	0.795367	0.151383	5	0.712647		506	0.151468	0.623262	0.204239	2	0.822148		351	0.103782	0.663248	0.0574585	2	0.866072		198	0.104067	0.341216	0.0861878	3	0.738759		413
544	0.356604	0.868421	0.0620234	2	0.876668		374	0.352845	0.726444	0.0920255	3	0.746653		106	0.104675	0.325373	0.246221	4	0.72323		261	0.505232	0.799228	0.151205	5	0.712647		507	0.152807	0.623262	0.203509	2	0.822148		352	0.103782	0.664957	0.0574355	2	0.866072		199	0.104067	0.344595	0.0861533	3	0.738759		414
545	0.356604	0.870066	0.0620166	2	0.876668		375	0.354482	0.726444	0.0912262	3	0.746653		107	0.104675	0.331343	0.246113	4	0.72323		262	0.508221	0.799228	0.150573	5	0.712647		508	0.152807	0.624526	0.203456	2	0.822148		353	0.106807	0.664957	0.0563397	2	0.866072		200	0.104467	0.344595	0.0858948	3	0.738759		415
546	0.358007	0.870066	0.0616564	2	0.876668		376	0.354482	0.729483	0.0912261	3	0.746653		108	0.106682	0.331343	0.245768	4	0.72323		263	0.508221	0.80695	0.149989	5	0.712647		509	0.153727	0.624526	0.202464	2	0.822148		354	0.106807	0.668376	0.0563354	2	0.866072		201	0.104467	0.347973	0.0858552	3	0.738759		416
547	0.358358	0.870066	0.0616545	2	0.876668		377	0.355301	0.729483	0.0908298	3	0.746653		109	0.106682	0.337313	0.245569	4	0.72323		264	0.517937	0.80695	0.146818	5	0.712647		510	0.153727	0.62579	0.20241	2	0.822148		355	0.106975	0.668376	0.0561826	2	0.866072		202	0.108774	0.347973	0.0834288	3	0.738759		417
548	0.358358	0.871711	0.061639	2	0.876668		378	0.355301	0.735562	0.0907062	3	0.746653		110	0.110984	0.337313	0.243972	4	0.72323		265	0.517937	0.810811	0.146804	5	0.712647		511	0.154187	0.62579	0.202179	2	0.822148		356	0.106975	0.670085	0.0561222	2	0.866072		203	0.108774	0.351351	0.0834083	3	0.738759		418
549	0.36134	0.871711	0.060482	2	0.876668		379	0.356529	0.735562	0.0902924	3	0.746653		111	0.110984	0.340299	0.243784	4	0.72323		266	0.523916	0.810811	0.145049	5	0.712647		512	0.154187	0.627054	0.202083	2	0.822148		357	0.108571	0.670085	0.0556192	2	0.866072		204	0.109275	0.351351	0.0832023	3	0.738759		419
550	0.36134	0.873355	0.0604708	2	0.876668		380	0.356529	0.741641	0.0900456	3	0.746653		112	0.111557	0.340299	0.243461	4	0.72323		267	0.523916	0.814672	0.145044	5	0.712647		513	0.155651	0.627054	0.200519	2	0.822148		358	0.108571	0.671795	0.0556055	2	0.866072		205	0.109275	0.35473	0.0831949	3	0.738759		420
551	0.362217	0.873355	0.0601949	2	0.876668		381	0.364102	0.741641	0.0876955	3	0.746653		113	0.111557	0.343284	0.243408	4	0.72323		268	0.524664	0.814672	0.144945	5	0.712647		514	0.155651	0.629583	0.200479	2	0.822148		359	0.109076	0.671795	0.0554682	2	0.866072		206	0.109375	0.35473	0.0831675	3	0.738759		421
552	0.362217	0.876645	0.0599957	2	0.876668		382	0.364102	0.744681	0.0876925	3	0.746653		114	0.112704	0.343284	0.242855	4	0.72323		269	0.524664	0.818533	0.144847	5	0.712647		515	0.155819	0.629583	0.200265	2	0.822148		360	0.109076	0.673504	0.0554633	2	0.866072		207	0.109575	0.35473	0.0831235	3	0.738759		422
553	0.369233	0.876645	0.0585081	2	0.876668		383	0.365125	0.744681	0.0872849	3	0.746653		115	0.112704	0.349254	0.242595	4	0.72323		270	0.535874	0.818533	0.141849	5	0.712647		516	0.155819	0.630847	0.200222	2	0.822148		361	0.10916	0.673504	0.055445	2	0.866072		208	0.110777	0.35473	0.0822267	3	0.738759		423
554	0.369584	0.876645	0.0584984	2	0.876668		384	0.365125	0.74772	0.0872458	3	0.746653		116	0.113278	0.349254	0.242542	4	0.72323		271	0.535874	0.822394	0.141718	5	0.712647		517	0.156446	0.630847	0.19958	2	0.822148		362	0.109328	0.673504	0.0554157	2	0.866072		209	0.110777	0.358108	0.0821834	3	0.738759		424
555	0.36976	0.876645	0.0584637	2	0.876668		385	0.365534	0.74772	0.0872119	3	0.746653		117	0.113278	0.352239	0.242347	4	0.72323		272	0.538864	0.822394	0.140437	5	0.712647		518	0.156446	0.632111	0.199549	2	0.822148		363	0.112101	0.673504	0.0544401	2	0.866072		210	0.111879	0.358108	0.0818221	3	0.738759		425
556	0.36976	0.878289	0.0584616	2	0.876668		386	0.365534	0.75076	0.0871611	3	0.746653		118	0.114425	0.352239	0.242158	4	0.72323		273	0.538864	0.826255	0.140124	5	0.712647		519	0.157617	0.632111	0.198883	2	0.822148		364	0.112101	0.675214	0.0544235	2	0.866072		211	0.111879	0.361486	0.0818194	3	0.738759		426
557	0.371338	0.878289	0.0581668	2	0.876668		387	0.366353	0.75076	0.086967	3	0.746653		119	0.114425	0.355224	0.242118	4	0.72323		274	0.543348	0.826255	0.138504	5	0.712647		520	0.157617	0.633375	0.198875	2	0.822148		365	0.113109	0.675214	0.0542921	2	0.866072		212	0.112179	0.361486	0.0816602	3	0.738759		427
558	0.371338	0.879934	0.0581639	2	0.876668		388	0.366353	0.756839	0.0868908	3	0.746653		120	0.116719	0.355224	0.241648	4	0.72323		275	0.543348	0.830116	0.138428	5	0.712647		521	0.159793	0.633375	0.19719	2	0.822148		366	0.113109	0.676923	0.0542871	2	0.866072		213	0.112179	0.364865	0.0816352	3	0.738759		428
559	0.371689	0.879934	0.0581413	2	0.876668		389	0.366558	0.756839	0.08688	3	0.746653		121	0.116719	0.358209	0.241634	4	0.72323		276	0.544843	0.830116	0.137579	5	0.712647		522	0.159793	0.63464	0.197189	2	0.822148		367	0.113613	0.676923	0.0541664	2	0.866072		214	0.113582	0.364865	0.0812496	3	0.738759		429
560	0.371689	0.881579	0.0581074	2	0.876668		390	0.366967	0.756839	0.0868413	3	0.746653		122	0.11844	0.358209	0.241077	4	0.72323		277	0.544843	0.837838	0.137178	5	0.712647		523	0.160127	0.63464	0.196989	2	0.822148		368	0.113782	0.676923	0.0541387	2	0.866072		215	0.113782	0.364865	0.081208	3	0.738759		430
561	0.37204	0.881579	0.0580197	2	0.876668		391	0.368604	0.756839	0.086263	3	0.746653		123	0.11844	0.361194	0.240909	4	0.72323		278	0.547085	0.837838	0.135625	5	0.712647		524	0.160127	0.635904	0.19693	2	0.822148		369	0.11437	0.676923	0.0539192	2	0.866072		216	0.114583	0.364865	0.0808788	3	0.738759		431
562	0.37204	0.883224	0.0580174	2	0.876668		392	0.368604	0.759878	0.0862449	3	0.746653		124	0.120161	0.361194	0.240294	4	0.72323		279	0.547085	0.841699	0.135078	5	0.712647		525	0.160964	0.635904	0.19612	2	0.822148		370	0.11437	0.678632	0.0539129	2	0.866072		217	0.114583	0.368243	0.0808694	3	0.738759		432
563	0.372566	0.883224	0.05792	2	0.876668		393	0.369628	0.759878	0.0859822	3	0.746653		125	0.120161	0.364179	0.240268	4	0.72323		280	0.549327	0.841699	0.134469	5	0.712647		526	0.160964	0.638432	0.196093	2	0.822148		371	0.114706	0.678632	0.0538425	2	0.866072		218	0.115385	0.368243	0.0804678	3	0.738759		433
564	0.372917	0.883224	0.0578942	2	0.876668		394	0.369628	0.762918	0.0858987	3	0.746653		126	0.120734	0.364179	0.239894	4	0.72323		281	0.549327	0.84556	0.134449	5	0.712647		527	0.162093	0.638432	0.195224	2	0.822148		372	0.114874	0.678632	0.0537695	2	0.866072		219	0.115385	0.371622	0.0804251	3	0.738759		434
565	0.375373	0.883224	0.0573215	2	0.876668		395	0.370242	0.762918	0.0856471	3	0.746653		127	0.121308	0.364179	0.239771	4	0.72323		282	0.564275	0.84556	0.129059	5	0.712647		528	0.162093	0.639697	0.195203	2	0.822148		373	0.115462	0.678632	0.0536452	2	0.866072		220	0.116787	0.371622	0.0799761	3	0.738759		435
566	0.375373	0.884868	0.0572658	2	0.876668		396	0.370242	0.765957	0.0856221	3	0.746653		128	0.121308	0.367164	0.239574	4	0.72323		283	0.564275	0.849421	0.128187	5	0.712647		529	0.162888	0.639697	0.19458	2	0.822148		374	0.115462	0.680342	0.0536167	2	0.866072		221	0.116987	0.371622	0.0799646	3	0.738759		436
567	0.378705	0.884868	0.0567263	2	0.876668		397	0.374949	0.765957	0.0842619	3	0.746653		129	0.121594	0.367164	0.239545	4	0.72323		284	0.567265	0.849421	0.127071	5	0.712647		530	0.162888	0.640961	0.194553	2	0.822148		375	0.11605	0.680342	0.0534692	2	0.866072		222	0.117788	0.371622	0.0798182	3	0.738759		437
568	0.378705	0.886513	0.0567047	2	0.876668		398	0.374949	0.768997	0.0842526	3	0.746653		130	0.121594	0.370149	0.239429	4	0.72323		285	0.567265	0.861004	0.126204	5	0.712647		531	0.164185	0.640961	0.193749	2	0.822148		376	0.11605	0.682051	0.0534488	2	0.866072		223	0.117788	0.375	0.0798148	3	0.738759		438
569	0.38046	0.886513	0.056398	2	0.876668		399	0.381293	0.768997	0.0825266	3	0.746653		131	0.122455	0.370149	0.239022	4	0.72323		286	0.570254	0.861004	0.125845	5	0.712647		532	0.164185	0.642225	0.193728	2	0.822148		377	0.116471	0.682051	0.0533174	2	0.866072		224	0.117989	0.375	0.0797321	3	0.738759		439
570	0.38046	0.888158	0.0563168	2	0.876668		400	0.381293	0.772036	0.0823069	3	0.746653		132	0.122455	0.376119	0.238668	4	0.72323		287	0.570254	0.864865	0.125142	5	0.712647		533	0.166485	0.642225	0.191803	2	0.822148		378	0.116639	0.682051	0.0533097	2	0.866072		225	0.117989	0.378378	0.079717	3	0.738759		440
571	0.388879	0.888158	0.0545869	2	0.876668		401	0.383135	0.772036	0.0818286	3	0.746653		133	0.124749	0.376119	0.23761	4	0.72323		288	0.573244	0.864865	0.123444	5	0.712647		534	0.166485	0.643489	0.191756	2	0.822148		379	0.117395	0.682051	0.0532121	2	0.866072		226	0.118189	0.378378	0.0796189	3	0.738759		441
572	0.388879	0.889803	0.0545346	2	0.876668		402	0.383135	0.775076	0.0818019	3	0.746653		134	0.124749	0.379104	0.237555	4	0.72323		289	0.573244	0.868726	0.122978	5	0.712647		535	0.167197	0.643489	0.191232	2	0.822148		380	0.117395	0.683761	0.0532098	2	0.866072		227	0.118189	0.381757	0.0795672	3	0.738759		442
573	0.402912	0.889803	0.0518061	2	0.876668		403	0.399099	0.775076	0.0771335	3	0.746653		135	0.125609	0.379104	0.237206	4	0.72323		290	0.577728	0.868726	0.12235	5	0.712647		536	0.167197	0.644753	0.19123	2	0.822148		381	0.117731	0.683761	0.0531547	2	0.866072		228	0.122496	0.381757	0.0773726	3	0.738759		443
574	0.402912	0.891447	0.0517893	2	0.876668		404	0.399099	0.778116	0.0771215	3	0.746653		136	0.125609	0.38209	0.236918	4	0.72323		291	0.577728	0.872587	0.121889	5	0.712647		537	0.168159	0.644753	0.190278	2	0.822148		382	0.117731	0.68547	0.0531447	2	0.866072		229	0.122496	0.385135	0.0773042	3	0.738759		444
575	0.404666	0.891447	0.0514839	2	0.876668		405	0.401555	0.778116	0.0765843	3	0.746653		137	0.130198	0.38209	0.23466	4	0.72323		292	0.580717	0.872587	0.120426	5	0.712647		538	0.168159	0.646018	0.19027	2	0.822148		383	0.118571	0.68547	0.0528892	2	0.866072		230	0.122696	0.385135	0.0772727	3	0.738759		445
576	0.404666	0.893092	0.0514718	2	0.876668		406	0.401555	0.781155	0.0764438	3	0.746653		138	0.130771	0.38209	0.234624	4	0.72323		293	0.580717	0.876448	0.12023	5	0.712647		539	0.168284	0.646018	0.190214	2	0.822148		384	0.118571	0.687179	0.0528467	2	0.866072		231	0.122696	0.391892	0.0772277	3	0.738759		446
577	0.407648	0.893092	0.0510231	2	0.876668		407	0.403193	0.781155	0.07611	3	0.746653		139	0.131058	0.38209	0.234616	4	0.72323		294	0.587444	0.876448	0.11779	5	0.712647		540	0.168284	0.647282	0.190169	2	0.822148		385	0.12042	0.687179	0.0523265	2	0.866072		232	0.1247	0.391892	0.0763567	3	0.738759		447
578	0.407648	0.894737	0.0509625	2	0.876668		408	0.403193	0.784195	0.0760473	3	0.746653		140	0.131058	0.385075	0.234484	4	0.72323		295	0.587444	0.880309	0.117723	5	0.712647		541	0.169121	0.647282	0.189393	2	0.822148		386	0.12042	0.688889	0.0523242	2	0.866072		233	0.1247	0.39527	0.076291	3	0.738759		448
579	0.408876	0.894737	0.05074	2	0.876668		409	0.404421	0.784195	0.0757818	3	0.746653		141	0.137367	0.385075	0.231054	4	0.72323		296	0.595665	0.880309	0.115006	5	0.712647		542	0.169121	0.648546	0.189357	2	0.822148		387	0.122773	0.688889	0.0515152	2	0.866072		234	0.1251	0.39527	0.0761369	3	0.738759		449
580	0.408876	0.896382	0.0506982	2	0.876668		410	0.404421	0.787234	0.0757223	3	0.746653		142	0.137367	0.38806	0.231045	4	0.72323		297	0.595665	0.88417	0.114958	5	0.712647		543	0.169497	0.648546	0.189035	2	0.822148		388	0.122773	0.690598	0.0515072	2	0.866072		235	0.1253	0.39527	0.0760443	3	0.738759		450
581	0.409928	0.896382	0.0505212	2	0.876668		411	0.406263	0.787234	0.0753977	3	0.746653		143	0.138801	0.38806	0.229073	4	0.72323		298	0.602392	0.88417	0.114022	5	0.712647		544	0.169497	0.64981	0.188987	2	0.822148		389	0.122857	0.690598	0.0514968	2	0.866072		236	0.126102	0.39527	0.0758928	3	0.738759		451
582	0.409928	0.898026	0.0504815	2	0.876668		412	0.406672	0.787234	0.0753417	3	0.746653		144	0.138801	0.39403	0.229042	4	0.72323		299	0.602392	0.888031	0.113573	5	0.712647		545	0.170668	0.64981	0.188136	2	0.822148		390	0.122857	0.694017	0.0513984	2	0.866072		237	0.126102	0.398649	0.0758907	3	0.738759		452
583	0.416418	0.898026	0.0493492	2	0.876668		413	0.411175	0.787234	0.0740662	3	0.746653		145	0.139662	0.39403	0.228901	4	0.72323		300	0.613602	0.888031	0.110275	5	0.712647		546	0.170668	0.651075	0.188096	2	0.822148		391	0.123025	0.694017	0.0513743	2	0.866072		238	0.130008	0.398649	0.074046	3	0.738759		453
584	0.416418	0.899671	0.0493362	2	0.876668		414	0.411175	0.790274	0.0740043	3	0.746653		146	0.139662	0.397015	0.228664	4	0.72323		301	0.613602	0.891892	0.108977	5	0.712647		547	0.171129	0.651075	0.187751	2	0.822148		392	0.123025	0.695726	0.0513725	2	0.866072		239	0.130008	0.402027	0.0740224	3	0.738759		454
585	0.419049	0.899671	0.0487663	2	0.876668		415	0.413631	0.790274	0.0731494	3	0.746653		147	0.140235	0.397015	0.22853	4	0.72323		302	0.616592	0.891892	0.107864	5	0.712647		548	0.171129	0.652339	0.187689	2	0.822148		393	0.125294	0.695726	0.050758	2	0.866072		240	0.13111	0.402027	0.0736303	3	0.738759		455
586	0.419049	0.901316	0.0487557	2	0.876668		416	0.413631	0.793313	0.0731336	3	0.746653		148	0.140235	0.4	0.228426	4	0.72323		303	0.616592	0.895753	0.10749	5	0.712647		549	0.1723	0.652339	0.186925	2	0.822148		394	0.125294	0.697436	0.0507452	2	0.866072		241	0.13111	0.405405	0.0736114	3	0.738759		456
587	0.425364	0.901316	0.0475952	2	0.876668		417	0.415268	0.793313	0.0726033	3	0.746653		149	0.14511	0.4	0.225141	4	0.72323		304	0.621076	0.895753	0.1056	5	0.712647		550	0.1723	0.653603	0.186896	2	0.822148		395	0.125462	0.697436	0.0506962	2	0.866072		242	0.132011	0.405405	0.0733905	3	0.738759		457
588	0.425364	0.902961	0.0475549	2	0.876668		418	0.415268	0.796353	0.0725162	3	0.746653		150	0.14511	0.402985	0.225136	4	0.72323		305	0.621076	0.899614	0.10548	5	0.712647		551	0.172844	0.653603	0.186494	2	0.822148		396	0.126134	0.697436	0.0505952	2	0.866072		243	0.132011	0.408784	0.073387	3	0.738759		458
589	0.428346	0.902961	0.0470892	2	0.876668		419	0.415882	0.796353	0.0721772	3	0.746653		151	0.154001	0.402985	0.221145	4	0.72323		306	0.639761	0.899614	0.099569	5	0.712647		552	0.172844	0.654867	0.186476	2	0.822148		397	0.126134	0.700855	0.0505836	2	0.866072		244	0.134315	0.408784	0.0724731	3	0.738759		459
590	0.428346	0.904605	0.0470793	2	0.876668		420	0.415882	0.799392	0.0721379	3	0.746653		152	0.154001	0.40597	0.220678	4	0.72323		307	0.639761	0.903475	0.0990833	5	0.712647		553	0.176357	0.654867	0.184077	2	0.822148		398	0.12958	0.700855	0.049364	2	0.866072		245	0.134315	0.412162	0.0724142	3	0.738759		460
591	0.433959	0.904605	0.0462594	2	0.876668		421	0.420589	0.799392	0.070812	3	0.746653		153	0.154861	0.40597	0.219683	4	0.72323		308	0.644245	0.903475	0.0965479	5	0.712647		554	0.176357	0.656131	0.184073	2	0.822148		399	0.12958	0.702564	0.0493483	2	0.866072		246	0.134415	0.412162	0.0723913	3	0.738759		461
592	0.433959	0.90625	0.0462386	2	0.876668		422	0.420589	0.802432	0.070769	3	0.746653		154	0.154861	0.408955	0.219572	4	0.72323		309	0.644245	0.907336	0.0960454	5	0.712647		555	0.176692	0.656131	0.183747	2	0.822148		400	0.13084	0.702564	0.0490869	2	0.866072		247	0.134615	0.412162	0.072295	3	0.738759		462
593	0.435713	0.90625	0.0459908	2	0.876668		423	0.42632	0.802432	0.0692915	3	0.746653		155	0.159163	0.408955	0.217496	4	0.72323		310	0.65994	0.907336	0.0892021	5	0.712647		556	0.176692	0.657396	0.183667	2	0.822148		401	0.13084	0.704274	0.0490742	2	0.866072		248	0.140825	0.412162	0.0705762	3	0.738759		463
594	0.435713	0.907895	0.0459832	2	0.876668		424	0.426729	0.802432	0.0692864	3	0.746653		156	0.159163	0.41194	0.217364	4	0.72323		311	0.65994	0.911197	0.0886133	5	0.712647		557	0.176901	0.657396	0.183567	2	0.822148		402	0.13437	0.704274	0.0483154	2	0.866072		249	0.140825	0.415541	0.0705522	3	0.738759		464
595	0.439046	0.907895	0.0454384	2	0.876668		425	0.427957	0.802432	0.0690033	3	0.746653		157	0.160597	0.41194	0.216361	4	0.72323		312	0.665919	0.911197	0.0869944	5	0.712647		558	0.176901	0.65866	0.183523	2	0.822148		403	0.13437	0.705983	0.0482761	2	0.866072		250	0.141426	0.415541	0.0703016	3	0.738759		465
596	0.439046	0.909539	0.0454294	2	0.876668		426	0.427957	0.805471	0.0689748	3	0.746653		158	0.160597	0.414925	0.21635	4	0.72323		313	0.665919	0.915058	0.0866719	5	0.712647		559	0.177947	0.65866	0.182279	2	0.822148		404	0.134538	0.705983	0.0482168	2	0.866072		251	0.141426	0.418919	0.0702808	3	0.738759		466
597	0.44308	0.909539	0.0447426	2	0.876668		427	0.429185	0.805471	0.0687076	3	0.746653		159	0.16203	0.414925	0.215869	4	0.72323		314	0.671151	0.915058	0.0846728	5	0.712647		560	0.177947	0.659924	0.182274	2	0.822148		405	0.134706	0.705983	0.0481966	2	0.866072		252	0.142228	0.418919	0.0699232	3	0.738759		467
598	0.44308	0.911184	0.0447412	2	0.876668		428	0.429185	0.808511	0.0686969	3	0.746653		160	0.16203	0.420896	0.215602	4	0.72323		315	0.671151	0.918919	0.0842649	5	0.712647		561	0.178365	0.659924	0.181888	2	0.822148		406	0.144622	0.705983	0.0459064	2	0.866072		253	0.142228	0.422297	0.0698827	3	0.738759		468
599	0.450623	0.911184	0.0430064	2	0.876668		429	0.431641	0.808511	0.0681575	3	0.746653		161	0.162317	0.420896	0.215388	4	0.72323		316	0.690583	0.918919	0.0793065	5	0.712647		562	0.178365	0.661188	0.181875	2	0.822148		407	0.144622	0.707692	0.0458661	2	0.866072		254	0.143429	0.422297	0.0692982	3	0.738759		469
600	0.450623	0.912829	0.0429959	2	0.876668		430	0.431641	0.81155	0.0681441	3	0.746653		162	0.162317	0.426866	0.215179	4	0.72323		317	0.690583	0.92278	0.0791568	5	0.712647		563	0.178909	0.661188	0.181653	2	0.822148		408	0.146303	0.707692	0.0453507	2	0.866072		255	0.143429	0.425676	0.0692911	3	0.738759		470
601	0.453429	0.912829	0.0425161	2	0.876668		431	0.431846	0.81155	0.068128	3	0.746653		163	0.164038	0.426866	0.21378	4	0.72323		318	0.707025	0.92278	0.0751221	5	0.712647		564	0.178909	0.662453	0.181649	2	0.822148		409	0.146303	0.711111	0.0453402	2	0.866072		256	0.145132	0.425676	0.0688687	3	0.738759		471
602	0.45378	0.912829	0.0424792	2	0.876668		432	0.432255	0.81155	0.0680674	3	0.746653		164	0.164038	0.429851	0.213763	4	0.72323		319	0.707025	0.926641	0.0750421	5	0.712647		565	0.178951	0.662453	0.181596	2	0.822148		410	0.149076	0.711111	0.0446513	2	0.866072		257	0.145132	0.429054	0.0687991	3	0.738759		472
603	0.455885	0.912829	0.04224	2	0.876668		433	0.436758	0.81155	0.0671432	3	0.746653		165	0.164611	0.429851	0.213651	4	0.72323		320	0.719731	0.926641	0.0709662	5	0.712647		566	0.178951	0.663717	0.181595	2	0.822148		411	0.149244	0.711111	0.0446335	2	0.866072		258	0.146534	0.429054	0.0680884	3	0.738759		473
604	0.455885	0.914474	0.0421919	2	0.876668		434	0.436758	0.81459	0.0671118	3	0.746653		166	0.164611	0.432836	0.213561	4	0.72323		321	0.719731	0.930502	0.0707622	5	0.712647		567	0.178993	0.663717	0.181542	2	0.822148		412	0.149664	0.711111	0.0445072	2	0.866072		259	0.146534	0.432432	0.0680103	3	0.738759		474
605	0.460446	0.914474	0.0413895	2	0.876668		435	0.44474	0.81459	0.0646018	3	0.746653		167	0.165759	0.432836	0.213083	4	0.72323		322	0.724215	0.930502	0.0688596	5	0.712647		568	0.178993	0.664981	0.181499	2	0.822148		413	0.149832	0.711111	0.0445072	2	0.866072		260	0.14974	0.432432	0.0667609	3	0.738759		475
606	0.460446	0.917763	0.0413472	2	0.876668		436	0.44474	0.817629	0.0644938	3	0.746653		168	0.165759	0.435821	0.212906	4	0.72323		323	0.724215	0.934363	0.0680859	5	0.712647		569	0.180624	0.664981	0.180678	2	0.822148		414	0.150084	0.711111	0.044414	2	0.866072		261	0.14994	0.432432	0.0667608	3	0.738759		476
607	0.475706	0.917763	0.0386192	2	0.876668		437	0.444945	0.817629	0.0644731	3	0.746653		169	0.166045	0.435821	0.212786	4	0.72323		324	0.740658	0.934363	0.0637381	5	0.712647		570	0.180624	0.666245	0.180676	2	0.822148		415	0.150084	0.712821	0.044364	2	0.866072		262	0.15024	0.432432	0.0666632	3	0.738759		477
608	0.475706	0.919408	0.038615	2	0.876668		438	0.444945	0.820669	0.0644139	3	0.746653		170	0.166045	0.441791	0.21259	4	0.72323		325	0.740658	0.938224	0.0636039	5	0.712647		571	0.180875	0.666245	0.180422	2	0.822148		416	0.151176	0.712821	0.0441446	2	0.866072		263	0.15024	0.435811	0.066546	3	0.738759		478
609	0.48623	0.919408	0.0367721	2	0.876668		439	0.454973	0.820669	0.0620843	3	0.746653		171	0.166332	0.441791	0.212524	4	0.72323		326	0.756353	0.938224	0.058726	5	0.712647		572	0.180875	0.667509	0.180418	2	0.822148		417	0.151345	0.712821	0.0441385	2	0.866072		264	0.152043	0.435811	0.0660513	3	0.738759		479
610	0.48623	0.921053	0.0367662	2	0.876668		440	0.454973	0.823708	0.0620225	3	0.746653		172	0.166906	0.441791	0.212297	4	0.72323		327	0.756353	0.942085	0.0586363	5	0.712647		573	0.181335	0.667509	0.180092	2	0.822148		418	0.151849	0.712821	0.0440342	2	0.866072		265	0.152043	0.439189	0.0660234	3	0.738759		480
611	0.487458	0.921053	0.0365195	2	0.876668		441	0.455792	0.823708	0.0618194	3	0.746653		173	0.175796	0.441791	0.207583	4	0.72323		328	0.76009	0.942085	0.058011	5	0.712647		574	0.181335	0.668774	0.180078	2	0.822148		419	0.151849	0.71453	0.0440156	2	0.866072		266	0.152344	0.439189	0.0659002	3	0.738759		481
612	0.487458	0.922697	0.0365093	2	0.876668		442	0.455792	0.826748	0.0618104	3	0.746653		174	0.175796	0.447761	0.207225	4	0.72323		329	0.76009	0.945946	0.0578794	5	0.712647		575	0.181754	0.668774	0.1798	2	0.822148		420	0.152269	0.71453	0.0439335	2	0.866072		267	0.152544	0.439189	0.0658548	3	0.738759		482
613	0.495527	0.922697	0.0350534	2	0.876668		443	0.465002	0.826748	0.0590966	3	0.746653		175	0.177516	0.447761	0.206928	4	0.72323		330	0.772795	0.945946	0.0546517	5	0.712647		576	0.181754	0.670038	0.179769	2	0.822148		421	0.152437	0.71453	0.0439032	2	0.866072		268	0.152845	0.439189	0.0657864	3	0.738759		483
614	0.495878	0.922697	0.035027	2	0.876668		444	0.465002	0.829787	0.0590574	3	0.746653		176	0.177516	0.450746	0.20692	4	0.72323		331	0.772795	0.949807	0.0546213	5	0.712647		577	0.181837	0.670038	0.179726	2	0.822148		422	0.152773	0.71453	0.0438894	2	0.866072		269	0.152845	0.442568	0.0657853	3	0.738759		484
615	0.499035	0.922697	0.0345794	2	0.876668		445	0.470323	0.829787	0.0576272	3	0.746653		177	0.179811	0.450746	0.206157	4	0.72323		332	0.783259	0.949807	0.0515161	5	0.712647		578	0.181837	0.671302	0.179693	2	0.822148		423	0.152773	0.716239	0.0438569	2	0.866072		270	0.153446	0.442568	0.0654669	3	0.738759		485
616	0.499386	0.922697	0.0345673	2	0.876668		446	0.470323	0.832827	0.0575035	3	0.746653		178	0.179811	0.453731	0.206118	4	0.72323		333	0.783259	0.953668	0.051453	5	0.712647		579	0.182757	0.671302	0.179074	2	0.822148		424	0.152857	0.716239	0.0438539	2	0.866072		271	0.153446	0.445946	0.0654452	3	0.738759		486
617	0.506929	0.922697	0.0334997	2	0.876668		447	0.481171	0.832827	0.0547792	3	0.746653		179	0.180384	0.453731	0.206009	4	0.72323		334	0.811659	0.953668	0.0449982	5	0.712647		580	0.182757	0.672566	0.179068	2	0.822148		425	0.152857	0.717949	0.0437884	2	0.866072		272	0.155449	0.445946	0.0647854	3	0.738759		487
618	0.507279	0.922697	0.033473	2	0.876668		448	0.481171	0.835866	0.054764	3	0.746653		180	0.180384	0.456716	0.205872	4	0.72323		335	0.811659	0.957529	0.0445092	5	0.712647		581	0.184849	0.672566	0.177734	2	0.822148		426	0.153361	0.717949	0.0436446	2	0.866072		273	0.155449	0.452703	0.0646447	3	0.738759		488
619	0.508858	0.922697	0.0333512	2	0.876668		449	0.504912	0.835866	0.0493977	3	0.746653		181	0.181531	0.456716	0.204993	4	0.72323		336	0.83707	0.957529	0.0381032	5	0.712647		582	0.184849	0.673831	0.177723	2	0.822148		427	0.153361	0.719658	0.0436301	2	0.866072		274	0.157552	0.452703	0.0639743	3	0.738759		489
620	0.508858	0.924342	0.033337	2	0.876668		450	0.504912	0.838906	0.0493642	3	0.746653		182	0.181531	0.459701	0.204976	4	0.72323		337	0.83707	0.96139	0.0380529	5	0.712647		583	0.186439	0.673831	0.176491	2	0.822148		428	0.15395	0.719658	0.043495	2	0.866072		275	0.157752	0.452703	0.0639376	3	0.738759		490
621	0.512542	0.924342	0.0329318	2	0.876668		451	0.51535	0.838906	0.0475839	3	0.746653		183	0.184686	0.459701	0.203462	4	0.72323		338	0.845291	0.96139	0.035812	5	0.712647		584	0.186439	0.675095	0.176476	2	0.822148		429	0.15395	0.721368	0.0434853	2	0.866072		276	0.159255	0.452703	0.0634237	3	0.738759		491
622	0.512542	0.925987	0.0329095	2	0.876668		452	0.51535	0.841945	0.0474941	3	0.746653		184	0.184686	0.462687	0.203328	4	0.72323		339	0.845291	0.965251	0.0357035	5	0.712647		585	0.187024	0.675095	0.176009	2	0.822148		430	0.155462	0.721368	0.0431423	2	0.866072		277	0.159255	0.456081	0.0634051	3	0.738759		492
623	0.521487	0.925987	0.0316709	2	0.876668		453	0.515555	0.841945	0.0474491	3	0.746653		185	0.185546	0.462687	0.202695	4	0.72323		340	0.851271	0.965251	0.0341202	5	0.712647		586	0.187024	0.676359	0.175992	2	0.822148		431	0.155462	0.723077	0.0430964	2	0.866072		278	0.159355	0.456081	0.0633757	3	0.738759		493
624	0.521487	0.927632	0.0316627	2	0.876668		454	0.515964	0.841945	0.0474154	3	0.746653		186	0.185546	0.465672	0.202525	4	0.72323		341	0.851271	0.969112	0.0340395	5	0.712647		587	0.188614	0.676359	0.174565	2	0.822148		432	0.155714	0.723077	0.0430749	2	0.866072		279	0.159355	0.459459	0.0633665	3	0.738759		494
625	0.521663	0.927632	0.0316327	2	0.876668		455	0.522309	0.841945	0.0465836	3	0.746653		187	0.190422	0.465672	0.200104	4	0.72323		342	0.852018	0.969112	0.0339612	5	0.712647		588	0.188614	0.677623	0.174547	2	0.822148		433	0.155714	0.724786	0.043072	2	0.866072		280	0.159455	0.459459	0.0633536	3	0.738759		495
626	0.522014	0.927632	0.0316103	2	0.876668		456	0.522718	0.841945	0.0465775	3	0.746653		188	0.190422	0.468657	0.200092	4	0.72323		343	0.852018	0.972973	0.0338609	5	0.712647		589	0.188865	0.677623	0.174424	2	0.822148		434	0.155966	0.724786	0.0430319	2	0.866072		281	0.159455	0.462838	0.063287	3	0.738759		496
627	0.527978	0.927632	0.0308649	2	0.876668		457	0.523127	0.841945	0.0462973	3	0.746653		189	0.192429	0.468657	0.197917	4	0.72323		344	0.85426	0.972973	0.0334933	5	0.712647		590	0.188865	0.678887	0.174402	2	0.822148		435	0.155966	0.728205	0.0430287	2	0.866072		282	0.161759	0.462838	0.0626927	3	0.738759		497
628	0.527978	0.929276	0.0308266	2	0.876668		458	0.523127	0.844985	0.0462399	3	0.746653		190	0.192429	0.471642	0.1978	4	0.72323		345	0.85426	0.976834	0.0334081	5	0.712647		591	0.189074	0.678887	0.174206	2	0.822148		436	0.157227	0.728205	0.0426495	2	0.866072		283	0.161759	0.466216	0.0626527	3	0.738759		498
629	0.531837	0.929276	0.0300434	2	0.876668		459	0.527016	0.844985	0.0450651	3	0.746653		191	0.199885	0.471642	0.192906	4	0.72323		346	0.878176	0.976834	0.0280512	5	0.712647		592	0.189074	0.680152	0.1742	2	0.822148		437	0.157395	0.728205	0.0426372	2	0.866072		284	0.162159	0.466216	0.0625922	3	0.738759		499
630	0.531837	0.930921	0.0300168	2	0.876668		460	0.527016	0.848024	0.0450253	3	0.746653		192	0.199885	0.474627	0.192844	4	0.72323		347	0.878176	0.980695	0.0278545	5	0.712647		593	0.191124	0.680152	0.172387	2	0.822148		438	0.158739	0.728205	0.0422825	2	0.866072		285	0.162159	0.469595	0.0625911	3	0.738759		500
631	0.547974	0.930921	0.0278543	2	0.876668		461	0.527835	0.848024	0.0447782	3	0.746653		193	0.206481	0.474627	0.188537	4	0.72323		348	0.878924	0.980695	0.0277883	5	0.712647		594	0.191124	0.681416	0.172375	2	0.822148		439	0.158739	0.729915	0.0422701	2	0.866072		286	0.163462	0.469595	0.0620471	3	0.738759		501
632	0.547974	0.932566	0.0278543	2	0.876668		462	0.527835	0.851064	0.044762	3	0.746653		194	0.206481	0.477612	0.188517	4	0.72323		349	0.878924	0.984556	0.0275186	5	0.712647		595	0.193215	0.681416	0.170711	2	0.822148		440	0.159832	0.729915	0.0420692	2	0.866072		287	0.163462	0.472973	0.0620451	3	0.738759		502
633	0.551833	0.932566	0.0272278	2	0.876668		463	0.528449	0.851064	0.0446669	3	0.746653		195	0.21193	0.477612	0.185407	4	0.72323		350	0.894619	0.984556	0.0247833	5	0.712647		596	0.193215	0.68268	0.170682	2	0.822148		441	0.159832	0.731624	0.0420522	2	0.866072		288	0.163562	0.472973	0.0620094	3	0.738759		503
634	0.551833	0.934211	0.027217	2	0.876668		464	0.528858	0.851064	0.0446132	3	0.746653		196	0.21193	0.480597	0.18515	4	0.72323		351	0.894619	0.988417	0.0242361	5	0.712647		597	0.193257	0.68268	0.170546	2	0.822148		442	0.160336	0.731624	0.0419748	2	0.866072		289	0.163562	0.476351	0.0619729	3	0.738759		504
635	0.559902	0.934211	0.026215	2	0.876668		465	0.53684	0.851064	0.042908	3	0.746653		197	0.215085	0.480597	0.183803	4	0.72323		352	0.905082	0.988417	0.022898	5	0.712647		598	0.193257	0.683944	0.170533	2	0.822148		443	0.160504	0.731624	0.0419492	2	0.866072		290	0.166266	0.476351	0.061128	3	0.738759		505
636	0.560253	0.934211	0.0261735	2	0.876668		466	0.53684	0.854103	0.04281	3	0.746653		198	0.215085	0.483582	0.183725	4	0.72323		353	0.905082	0.992278	0.022862	5	0.712647		599	0.193926	0.683944	0.169973	2	0.822148		444	0.160672	0.731624	0.0419215	2	0.866072		291	0.166266	0.47973	0.0611215	3	0.738759		506
637	0.563059	0.934211	0.0257781	2	0.876668		467	0.540933	0.854103	0.0422545	3	0.746653		199	0.216805	0.483582	0.182714	4	0.72323		354	0.933483	0.992278	0.017817	5	0.712647		600	0.193926	0.685209	0.169957	2	0.822148		445	0.16084	0.731624	0.0419209	2	0.866072		292	0.16847	0.47973	0.0603322	3	0.738759		507
638	0.563059	0.9375	0.0257552	2	0.876668		468	0.540933	0.857143	0.0421678	3	0.746653		200	0.216805	0.486567	0.18255	4	0.72323		355	0.933483	0.996139	0.0177827	5	0.712647		601	0.197482	0.685209	0.16743	2	0.822148		446	0.161849	0.731624	0.0417281	2	0.866072		293	0.16847	0.483108	0.0602858	3	0.738759		508
639	0.566567	0.9375	0.0252792	2	0.876668		469	0.543594	0.857143	0.0413745	3	0.746653		201	0.219386	0.486567	0.180724	4	0.72323		356	1	0.996139	0.00350347	5	0.712647		602	0.197482	0.686473	0.167408	2	0.822148		447	0.161849	0.733333	0.0417274	2	0.866072		294	0.171174	0.483108	0.0597376	3	0.738759		509
640	0.566567	0.939145	0.0252753	2	0.876668		470	0.543594	0.860182	0.0413225	3	0.746653		202	0.219386	0.489552	0.180692	4	0.72323		357	1	1	0.00104868	5	0.712647		603	0.198862	0.686473	0.166506	2	0.822148		448	0.162605	0.733333	0.0415168	2	0.866072		295	0.171174	0.486486	0.0597312	3	0.738759		510
641	0.583933	0.939145	0.0234843	2	0.876668		471	0.546664	0.860182	0.0408469	3	0.746653		203	0.221107	0.489552	0.17966	4	0.72323		0	0	0	1.99697	6	0.6976		604	0.198862	0.687737	0.166478	2	0.822148		449	0.162773	0.733333	0.0415165	2	0.866072		296	0.171575	0.486486	0.0595696	3	0.738759		511
642	0.583933	0.940789	0.0234545	2	0.876668		472	0.546664	0.863222	0.0408254	3	0.746653		204	0.221107	0.492537	0.179645	4	0.72323		1	0	0.00342466	0.996967	6	0.6976		605	0.199364	0.687737	0.166285	2	0.822148		450	0.166471	0.733333	0.0406903	2	0.866072		297	0.171575	0.489865	0.059553	3	0.738759		512
643	0.586564	0.940789	0.0232044	2	0.876668		473	0.549325	0.863222	0.0404085	3	0.746653		205	0.225409	0.492537	0.177536	4	0.72323		2	0	0.0136986	0.989157	6	0.6976		606	0.199364	0.689001	0.166279	2	0.822148		451	0.166471	0.735043	0.0406772	2	0.866072		298	0.172476	0.489865	0.059225	3	0.738759		513
644	0.586564	0.942434	0.0231518	2	0.876668		474	0.549734	0.863222	0.040401	3	0.746653		206	0.225982	0.492537	0.177017	4	0.72323		3	0	0.0205479	0.952223	6	0.6976		607	0.19949	0.689001	0.166213	2	0.822148		452	0.168151	0.735043	0.0403174	2	0.866072		299	0.172476	0.493243	0.0592234	3	0.738759		514
645	0.604631	0.942434	0.0215313	2	0.876668		475	0.555669	0.863222	0.0393225	3	0.746653		207	0.227416	0.492537	0.175713	4	0.72323		4	0	0.0273973	0.929918	6	0.6976		608	0.19949	0.690265	0.166147	2	0.822148		453	0.168319	0.735043	0.0403121	2	0.866072		300	0.174379	0.493243	0.0587471	3	0.738759		515
646	0.604631	0.944079	0.0215113	2	0.876668		476	0.556079	0.863222	0.0392602	3	0.746653		208	0.227416	0.495522	0.175603	4	0.72323		5	0.00189753	0.0273973	0.902216	6	0.6976		609	0.200117	0.690265	0.16584	2	0.822148		454	0.168824	0.735043	0.0402215	2	0.866072		301	0.174379	0.496622	0.0587332	3	0.738759		516
647	0.614804	0.944079	0.0205974	2	0.876668		477	0.55833	0.863222	0.0386672	3	0.746653		209	0.230857	0.495522	0.173915	4	0.72323		6	0.00189753	0.0479452	0.778526	6	0.6976		610	0.200117	0.69153	0.165802	2	0.822148		455	0.168824	0.736752	0.0401905	2	0.866072		302	0.17528	0.496622	0.0585129	3	0.738759		517
648	0.614804	0.947368	0.0205787	2	0.876668		478	0.55833	0.869301	0.0386329	3	0.746653		210	0.230857	0.498507	0.173853	4	0.72323		7	0.0028463	0.0479452	0.769364	6	0.6976		611	0.206392	0.69153	0.161488	2	0.822148		456	0.17084	0.736752	0.0398251	2	0.866072		303	0.17528	0.5	0.0584693	3	0.738759		518
649	0.620242	0.947368	0.0200064	2	0.876668		479	0.559967	0.869301	0.0382428	3	0.746653		211	0.231718	0.498507	0.173719	4	0.72323		8	0.0028463	0.0582192	0.678829	6	0.6976		612	0.206392	0.692794	0.161446	2	0.822148		457	0.17084	0.738462	0.0398208	2	0.866072		304	0.177384	0.5	0.0578217	3	0.738759		519
650	0.620242	0.949013	0.0200011	2	0.876668		480	0.559967	0.87234	0.0381623	3	0.746653		212	0.231718	0.501493	0.173378	4	0.72323		9	0.00664137	0.0582192	0.622861	6	0.6976		613	0.206726	0.692794	0.161343	2	0.822148		458	0.172857	0.738462	0.0393923	2	0.866072		305	0.177384	0.503378	0.057818	3	0.738759		520
651	0.623399	0.949013	0.0197324	2	0.876668		481	0.573885	0.87234	0.0359164	3	0.746653		213	0.232865	0.501493	0.172697	4	0.72323		10	0.00664137	0.0616438	0.613994	6	0.6976		614	0.206726	0.694058	0.161327	2	0.822148		459	0.172857	0.74188	0.039377	2	0.866072		306	0.177985	0.503378	0.0575077	3	0.738759		521
652	0.623399	0.950658	0.0197069	2	0.876668		482	0.574294	0.87234	0.0358607	3	0.746653		214	0.232865	0.504478	0.172685	4	0.72323		11	0.00759013	0.0616438	0.59043	6	0.6976		615	0.208065	0.694058	0.160449	2	0.822148		460	0.17437	0.74188	0.0391647	2	0.866072		307	0.177985	0.506757	0.0575041	3	0.738759		522
653	0.633924	0.950658	0.018812	2	0.876668		483	0.579206	0.87234	0.0352265	3	0.746653		215	0.236306	0.504478	0.171544	4	0.72323		12	0.00759013	0.0650685	0.563124	6	0.6976		616	0.208065	0.695322	0.1604	2	0.822148		461	0.17437	0.74359	0.0391555	2	0.866072		308	0.178085	0.506757	0.0575038	3	0.738759		523
654	0.633924	0.952303	0.0188004	2	0.876668		484	0.579206	0.878419	0.0351811	3	0.746653		216	0.236306	0.507463	0.171424	4	0.72323		13	0.0085389	0.0650685	0.560625	6	0.6976		617	0.20978	0.695322	0.159283	2	0.822148		462	0.175294	0.74359	0.0389834	2	0.866072		309	0.178085	0.510135	0.0572286	3	0.738759		524
655	0.646553	0.952303	0.0178044	2	0.876668		485	0.599263	0.878419	0.0323312	3	0.746653		217	0.237167	0.507463	0.171153	4	0.72323		14	0.0085389	0.0753425	0.545873	6	0.6976		618	0.20978	0.696587	0.159268	2	0.822148		463	0.175294	0.745299	0.0389796	2	0.866072		310	0.178285	0.510135	0.0570983	3	0.738759		525
656	0.646553	0.953947	0.0178037	2	0.876668		486	0.599263	0.881459	0.0322669	3	0.746653		218	0.237167	0.510448	0.171016	4	0.72323		15	0.00948767	0.0753425	0.540621	6	0.6976		619	0.210575	0.696587	0.158565	2	0.822148		464	0.176387	0.745299	0.0387475	2	0.866072		311	0.178285	0.513514	0.0570553	3	0.738759		526
657	0.648132	0.953947	0.0176324	2	0.876668		487	0.609701	0.881459	0.0309097	3	0.746653		219	0.23774	0.510448	0.170486	4	0.72323		16	0.00948767	0.0787671	0.525129	6	0.6976		620	0.210575	0.697851	0.158537	2	0.822148		465	0.176387	0.748718	0.0387451	2	0.866072		312	0.179487	0.513514	0.0566828	3	0.738759		527
658	0.648132	0.955592	0.017602	2	0.876668		488	0.609701	0.887538	0.030868	3	0.746653		220	0.23774	0.513433	0.170285	4	0.72323		17	0.0104364	0.0787671	0.522509	6	0.6976		621	0.212583	0.697851	0.15726	2	0.822148		466	0.177059	0.748718	0.0385478	2	0.866072		313	0.179688	0.513514	0.0566318	3	0.738759		528
659	0.653745	0.955592	0.0170286	2	0.876668		489	0.619525	0.887538	0.029648	3	0.746653		221	0.238027	0.513433	0.170199	4	0.72323		18	0.0104364	0.0821918	0.51393	6	0.6976		622	0.212583	0.699115	0.157253	2	0.822148		467	0.177059	0.750427	0.0385453	2	0.866072		314	0.182893	0.513514	0.0555494	3	0.738759		529
660	0.653745	0.957237	0.0170254	2	0.876668		490	0.619525	0.890578	0.0295603	3	0.746653		222	0.238027	0.516418	0.170036	4	0.72323		19	0.0113852	0.0821918	0.506814	6	0.6976		623	0.213126	0.699115	0.15705	2	0.822148		468	0.177563	0.750427	0.038356	2	0.866072		315	0.182893	0.516892	0.0555027	3	0.738759		530
661	0.657779	0.957237	0.0166894	2	0.876668		491	0.630168	0.890578	0.0282129	3	0.746653		223	0.241468	0.516418	0.168766	4	0.72323		20	0.0113852	0.0856164	0.502445	6	0.6976		624	0.213126	0.700379	0.157044	2	0.822148		469	0.177563	0.752137	0.0383409	2	0.866072		316	0.184295	0.516892	0.0552075	3	0.738759		531
662	0.657779	0.958882	0.0166821	2	0.876668		492	0.630168	0.893617	0.0281733	3	0.746653		224	0.241468	0.522388	0.168311	4	0.72323		21	0.0132827	0.0856164	0.490908	6	0.6976		625	0.2148	0.700379	0.155806	2	0.822148		470	0.178235	0.752137	0.038058	2	0.866072		317	0.184295	0.52027	0.0552059	3	0.738759		532
663	0.675145	0.958882	0.0151323	2	0.876668		493	0.641629	0.893617	0.0267319	3	0.746653		225	0.244049	0.522388	0.166697	4	0.72323		22	0.0132827	0.0924658	0.486717	6	0.6976		626	0.2148	0.701643	0.155801	2	0.822148		471	0.178235	0.753846	0.0380369	2	0.866072		318	0.185998	0.52027	0.0546747	3	0.738759		533
664	0.675145	0.960526	0.0151322	2	0.876668		494	0.641629	0.896657	0.0267055	3	0.746653		226	0.244049	0.525373	0.166641	4	0.72323		23	0.0142315	0.0924658	0.484881	6	0.6976		627	0.21572	0.701643	0.155256	2	0.822148		472	0.179328	0.753846	0.0377885	2	0.866072		319	0.185998	0.523649	0.0546445	3	0.738759		534
665	0.675496	0.960526	0.0151185	2	0.876668		495	0.648588	0.896657	0.0255968	3	0.746653		227	0.247777	0.525373	0.164974	4	0.72323		24	0.0142315	0.0958904	0.484813	6	0.6976		628	0.21572	0.702908	0.155199	2	0.822148		473	0.179496	0.753846	0.0377545	2	0.866072		320	0.186198	0.523649	0.0545867	3	0.738759		535
666	0.675496	0.962171	0.0151078	2	0.876668		496	0.648588	0.899696	0.0255832	3	0.746653		228	0.247777	0.528358	0.16497	4	0.72323		25	0.016129	0.0958904	0.480707	6	0.6976		629	0.216138	0.702908	0.154845	2	0.822148		474	0.180252	0.753846	0.0376212	2	0.866072		321	0.186198	0.527027	0.0545632	3	0.738759		536
667	0.689353	0.962171	0.0141382	2	0.876668		497	0.648997	0.899696	0.0255429	3	0.746653		229	0.255521	0.528358	0.162006	4	0.72323		26	0.016129	0.10274	0.476303	6	0.6976		630	0.216138	0.704172	0.154809	2	0.822148		475	0.180252	0.755556	0.0376066	2	0.866072		322	0.191206	0.527027	0.0532038	3	0.738759		537
668	0.689353	0.963816	0.0141142	2	0.876668		498	0.648997	0.902736	0.025538	3	0.746653		230	0.255521	0.531343	0.161992	4	0.72323		27	0.0170778	0.10274	0.474511	6	0.6976		631	0.217184	0.704172	0.154104	2	0.822148		476	0.180504	0.755556	0.0375469	2	0.866072		323	0.191206	0.530405	0.0531945	3	0.738759		538
669	0.695667	0.963816	0.0136698	2	0.876668		499	0.670487	0.902736	0.0228971	3	0.746653		231	0.258102	0.531343	0.160902	4	0.72323		28	0.0170778	0.106164	0.47364	6	0.6976		632	0.217184	0.705436	0.154037	2	0.822148		477	0.180672	0.755556	0.037546	2	0.866072		324	0.194912	0.530405	0.052433	3	0.738759		539
670	0.695667	0.965461	0.0136517	2	0.876668		500	0.670487	0.905775	0.0228756	3	0.746653		232	0.258102	0.534328	0.160782	4	0.72323		29	0.0189753	0.106164	0.468776	6	0.6976		633	0.218481	0.705436	0.153245	2	0.822148		478	0.182773	0.755556	0.0370727	2	0.866072		325	0.194912	0.533784	0.0524108	3	0.738759		540
671	0.696018	0.965461	0.0136297	2	0.876668		501	0.670692	0.905775	0.0228619	3	0.746653		233	0.258388	0.534328	0.16063	4	0.72323		30	0.0189753	0.113014	0.467649	6	0.6976		634	0.218481	0.7067	0.153099	2	0.822148		479	0.182773	0.758974	0.037063	2	0.866072		326	0.196915	0.533784	0.0517136	3	0.738759		541
672	0.696018	0.967105	0.0136158	2	0.876668		502	0.670692	0.908815	0.0228318	3	0.746653		234	0.258388	0.537313	0.160589	4	0.72323		31	0.0227704	0.113014	0.459054	6	0.6976		635	0.218564	0.7067	0.153084	2	0.822148		480	0.182857	0.758974	0.0370329	2	0.866072		327	0.196915	0.537162	0.0517019	3	0.738759		542
673	0.69672	0.967105	0.0135845	2	0.876668		503	0.67192	0.908815	0.0226984	3	0.746653		235	0.259822	0.537313	0.160031	4	0.72323		32	0.0227704	0.123288	0.452263	6	0.6976		636	0.218564	0.707965	0.153036	2	0.822148		481	0.182857	0.760684	0.0370018	2	0.866072		328	0.199619	0.537162	0.0506074	3	0.738759		543
674	0.69672	0.96875	0.0135444	2	0.876668		504	0.67192	0.911854	0.0226983	3	0.746653		236	0.259822	0.540299	0.159837	4	0.72323		33	0.0265655	0.123288	0.441529	6	0.6976		637	0.221074	0.707965	0.151707	2	0.822148		482	0.185294	0.760684	0.0364498	2	0.866072		329	0.199619	0.540541	0.0506047	3	0.738759		544
675	0.697948	0.96875	0.0133839	2	0.876668		505	0.672124	0.911854	0.0226777	3	0.746653		237	0.260109	0.540299	0.159829	4	0.72323		34	0.0265655	0.130137	0.44032	6	0.6976		638	0.221074	0.709229	0.151699	2	0.822148		483	0.185294	0.762393	0.0364297	2	0.866072		330	0.20012	0.540541	0.0504813	3	0.738759		545
676	0.698299	0.96875	0.0133824	2	0.876668		506	0.672124	0.914894	0.0226617	3	0.746653		238	0.260109	0.543284	0.159634	4	0.72323		35	0.0265655	0.133562	0.439372	6	0.6976		639	0.222538	0.709229	0.150754	2	0.822148		484	0.191008	0.762393	0.0354692	2	0.866072		331	0.20012	0.547297	0.0504275	3	0.738759		546
677	0.703912	0.96875	0.0129135	2	0.876668		507	0.67499	0.914894	0.0224176	3	0.746653		239	0.264124	0.543284	0.158592	4	0.72323		36	0.0275142	0.133562	0.439247	6	0.6976		640	0.222538	0.710493	0.150728	2	0.822148		485	0.191008	0.764103	0.035463	2	0.866072		332	0.200621	0.547297	0.0503897	3	0.738759		547
678	0.704262	0.96875	0.0129032	2	0.876668		508	0.67499	0.917933	0.0223872	3	0.746653		240	0.264124	0.549254	0.158338	4	0.72323		37	0.0275142	0.136986	0.437862	6	0.6976		641	0.224086	0.710493	0.149942	2	0.822148		486	0.193277	0.764103	0.0351494	2	0.866072		333	0.200621	0.550676	0.0503743	3	0.738759		548
679	0.729521	0.96875	0.0112334	2	0.876668		509	0.685632	0.917933	0.0212015	3	0.746653		241	0.268999	0.549254	0.156675	4	0.72323		38	0.028463	0.136986	0.433607	6	0.6976		642	0.224086	0.711757	0.149937	2	0.822148		487	0.193445	0.764103	0.0351355	2	0.866072		334	0.215345	0.550676	0.0469903	3	0.738759		549
680	0.729521	0.970395	0.0112251	2	0.876668		510	0.685632	0.920973	0.0211713	3	0.746653		242	0.268999	0.552239	0.156669	4	0.72323		39	0.028463	0.14726	0.430868	6	0.6976		643	0.224797	0.711757	0.149478	2	0.822148		488	0.196218	0.764103	0.0345898	2	0.866072		335	0.215345	0.554054	0.0469754	3	0.738759		550
681	0.740923	0.970395	0.0105525	2	0.876668		511	0.691772	0.920973	0.0205048	3	0.746653		243	0.269573	0.552239	0.156249	4	0.72323		40	0.0313093	0.14726	0.42559	6	0.6976		644	0.224797	0.713021	0.149472	2	0.822148		489	0.196387	0.764103	0.0345787	2	0.866072		336	0.216246	0.554054	0.0466799	3	0.738759		551
682	0.741449	0.970395	0.0105485	2	0.876668		512	0.691772	0.924012	0.0204775	3	0.746653		244	0.269573	0.555224	0.156016	4	0.72323		41	0.0313093	0.15411	0.423852	6	0.6976		645	0.229482	0.713021	0.146543	2	0.822148		490	0.198571	0.764103	0.0341004	2	0.866072		337	0.216446	0.554054	0.0466607	3	0.738759		552
683	0.747237	0.970395	0.0102647	2	0.876668		513	0.691977	0.924012	0.0204675	3	0.746653		245	0.270146	0.555224	0.155714	4	0.72323		42	0.0322581	0.15411	0.423506	6	0.6976		646	0.229482	0.714286	0.146505	2	0.822148		491	0.198571	0.765812	0.0340848	2	0.866072		338	0.217348	0.554054	0.0465703	3	0.738759		553
684	0.747237	0.972039	0.0102538	2	0.876668		514	0.691977	0.927052	0.0204237	3	0.746653		246	0.270146	0.558209	0.155588	4	0.72323		43	0.0322581	0.164384	0.41553	6	0.6976		647	0.229817	0.714286	0.146314	2	0.822148		492	0.200756	0.765812	0.0336542	2	0.866072		339	0.217548	0.554054	0.0465668	3	0.738759		554
685	0.748991	0.972039	0.0100642	2	0.876668		515	0.692591	0.927052	0.0203767	3	0.746653		247	0.270433	0.558209	0.155208	4	0.72323		44	0.0370019	0.164384	0.407011	6	0.6976		648	0.229817	0.71555	0.146282	2	0.822148		493	0.200756	0.767521	0.0336255	2	0.866072		340	0.219651	0.554054	0.0460277	3	0.738759		555
686	0.748991	0.973684	0.0100633	2	0.876668		516	0.692591	0.930091	0.0203166	3	0.746653		248	0.270433	0.561194	0.155107	4	0.72323		45	0.0370019	0.171233	0.404248	6	0.6976		649	0.232201	0.71555	0.144713	2	0.822148		494	0.201261	0.767521	0.0335931	2	0.866072		341	0.219651	0.557432	0.0459791	3	0.738759		556
687	0.755306	0.973684	0.00964783	2	0.876668		517	0.693819	0.930091	0.0200758	3	0.746653		249	0.272154	0.561194	0.154436	4	0.72323		46	0.0388994	0.171233	0.398358	6	0.6976		650	0.232201	0.716814	0.144704	2	0.822148		495	0.201261	0.769231	0.0335829	2	0.866072		342	0.220954	0.557432	0.0456283	3	0.738759		557
688	0.755306	0.975329	0.0096415	2	0.876668		518	0.694228	0.930091	0.0200736	3	0.746653		250	0.272154	0.564179	0.154097	4	0.72323		47	0.0388994	0.181507	0.39609	6	0.6976		651	0.232619	0.716814	0.144372	2	0.822148		496	0.204874	0.769231	0.0329487	2	0.866072		343	0.220954	0.560811	0.0456216	3	0.738759		558
689	0.757937	0.975329	0.00952215	2	0.876668		519	0.694638	0.930091	0.0200674	3	0.746653		251	0.280184	0.564179	0.150953	4	0.72323		48	0.040797	0.181507	0.39435	6	0.6976		652	0.232619	0.718078	0.144333	2	0.822148		497	0.204874	0.77094	0.0329427	2	0.866072		344	0.221054	0.560811	0.0456096	3	0.738759		559
690	0.757937	0.976974	0.00952003	2	0.876668		520	0.694638	0.933131	0.0200449	3	0.746653		252	0.280184	0.567164	0.150932	4	0.72323		49	0.040797	0.188356	0.393824	6	0.6976		653	0.232996	0.718078	0.144162	2	0.822148		498	0.211849	0.77094	0.0317076	2	0.866072		345	0.221254	0.560811	0.0455863	3	0.738759		560
691	0.759867	0.976974	0.0093508	2	0.876668		521	0.701187	0.933131	0.0193703	3	0.746653		253	0.281904	0.567164	0.150224	4	0.72323		50	0.0436433	0.188356	0.391714	6	0.6976		654	0.232996	0.719343	0.144147	2	0.822148		499	0.211849	0.77265	0.0316975	2	0.866072		346	0.222055	0.560811	0.0453084	3	0.738759		561
692	0.759867	0.978618	0.00934644	2	0.876668		522	0.701596	0.933131	0.0193548	3	0.746653		254	0.281904	0.570149	0.150161	4	0.72323		51	0.0436433	0.191781	0.391374	6	0.6976		655	0.233791	0.719343	0.143671	2	0.822148		500	0.214958	0.77265	0.0313272	2	0.866072		347	0.222055	0.564189	0.0453013	3	0.738759		562
693	0.764778	0.978618	0.00914757	2	0.876668		523	0.709783	0.933131	0.0185939	3	0.746653		255	0.282191	0.570149	0.150127	4	0.72323		52	0.0464896	0.191781	0.390484	6	0.6976		656	0.233791	0.720607	0.143655	2	0.822148		501	0.214958	0.774359	0.0313169	2	0.866072		348	0.222356	0.564189	0.0452711	3	0.738759		563
694	0.764778	0.980263	0.00913518	2	0.876668		524	0.709783	0.93617	0.0185757	3	0.746653		256	0.282191	0.573134	0.150093	4	0.72323		53	0.0464896	0.195205	0.389483	6	0.6976		657	0.235338	0.720607	0.142802	2	0.822148		502	0.215798	0.774359	0.0311199	2	0.866072		349	0.222356	0.567568	0.0452446	3	0.738759		564
[truncated: 10,674 more rows]
[truncated: 17 more columns]

## Sheet: Fig. 4
Fig.4. Cumulative risk at multiple time points on different cohorts and different sub-groups.
A. 1-10 year risk in test set (primary cancer risk)
	1-Y	2-Y	3-Y	4-Y	5-Y	6-Y	7-Y	8-Y	9-Y	10-Y
[truncated: 53 more rows]

## Sheet: Table 2
P values of DeLong's Test: Table 2 Comparison of 10-year risk predictions on inhosue test set and CSAW-CC dataset.
[truncated: 14 more rows]

[truncated: 9 more sheets: Table 3, Table 4, Table 5, Table S7, Table S8, Table S16, Table S17, Table S18, Table S19]
